# Supplementary material for: A seven-year surveillance of epidemiology of malaria reveals travel and gender are the key drivers of dispersion of drug resistant genotypes in Kenya
Source: PeerJ. 2020 Mar 12;8:e8082. doi: 10.7717/peerj.8082 (PMC7073242; doi:10.7717/peerj.8082)
Supplement: Supplemental Information 1 [file peerj-08-8082-s001.xls]

## Sheet: Sheet1
studyid	studysite	date	district	sex	county	traveled2m	travelledwhen	malariaever	malarialongyr	malarialongmth	attackslast12mths	treatedmalaria6wks	treatment	treatmentsource	chiefcomplaint	noofdayssick	weight	temperature	pulse	diagnosis1	diagnosis2	pfparasit_ul	poparasite_ul	pvparasites_ul	pmparasites_ul	gametocytes_ul	epizones	age	agegroup	crt76status	mdr_86status	mdr184status	visitdate	visityear	visitquarter	resitant	fp_resistant	Qyear	chiefcomplaint1	pfparasite2	epizones1	mutantstatus	agegroup1
MDH1201060	Malindi DH	1/18/2012	Malindi	Male	Kilifi	Yes	2-4 weeks	No				No			Fever	5	13	36.6	78	Malaria		11440					Coast Endemic	5	0 - 5 years	wild type/Mutant	wild type/Mutant	Mutant	2012-01-18	2012	1	1	0	1-2012	Fever	9.34487	1. Coast Endemic	MDR184	1. 0 - 5 years
MDH1202069	Malindi DH	2/6/2012	Malindi	Female	Kilifi	Yes	2-4 weeks	No				No			Fever	3	11	39.8	86	Malaria		25120					Coast Endemic	1	0 - 5 years	Mutant	Mutant	Wild type	2012-02-06	2012	1	1	1	1-2012	Fever	10.1314	1. Coast Endemic	MDR86	1. 0 - 5 years
MDH1202078	Malindi DH	2/24/2012	Malindi	Male	Kilifi	No		No				No			Fever	1	8	36.3	88	Malaria		11520					Coast Endemic	0	0 - 5 years	Wild type	Wild type	Mutant	2012-02-24	2012	1	1	0	1-2012	Fever	9.35184	1. Coast Endemic	MDR184	1. 0 - 5 years
MDH1112052	Malindi DH	12/8/2011	Malindi	Male	Kilifi	No		No				No			Fever	2	18	38.4	80	Malaria		38880					Coast Endemic	6	6 - 15 years	Wild type	Wild type	Mutant	2011-12-08	2011	4	1	0	4-2011	Fever	10.5682	1. Coast Endemic	MDR184	2. 6 - 15 years
MDH1201057	Malindi DH	1/11/2012	Malindi	Male	Kilifi	No		Yes			2	Yes	Other	Hospital/Dispensary	Fever	7	17	39.5	100	Malaria		28800					Coast Endemic	6	6 - 15 years	wild type/Mutant	Wild type	Mutant	2012-01-11	2012	1	1	0	1-2012	Fever	10.2681	1. Coast Endemic	MDR184	2. 6 - 15 years
MDH1208106	Malindi DH	8/15/2012	Malindi	Male	Kilifi	No		No				No			Fever	3	20	40.8	88	Malaria		69200					Coast Endemic	5	0 - 5 years	undetermined	Wild type	Wild type	2012-08-15	2012	3	0	2	2-2013	Fever	11.1448	1. Coast Endemic		1. 0 - 5 years
MDH1202071	Malindi DH	2/10/2012	Malindi	Female	Kilifi	Yes	<2weeks	No				No			Fever	4	15	38.2	80	Malaria		13160					Coast Endemic	4	0 - 5 years	wild type/Mutant	Wild type	Wild type	2012-02-10	2012	1	0	0	1-2012	Fever	9.48494	1. Coast Endemic		1. 0 - 5 years
MDH1202070	Malindi DH	2/10/2012	Malindi	Male	Kilifi	Yes	2-4 weeks	No				No			Headache	3	60	36	72	Malaria		1440					Coast Endemic	24	Above 15 years	Mutant	Mutant	Wild type	2012-02-10	2012	1	1	1	1-2012	Headache	7.2724	1. Coast Endemic	MDR86	3. Above 15 years
MDH1201066	Malindi DH	1/30/2012	Malindi	Male	Kilifi	No		Yes	12			No			Fever	10	56	39.1	80	Malaria		77600					Coast Endemic	22	Above 15 years	Wild type	undetermined	Wild type	2012-01-30	2012	1	0	0	1-2012	Fever	11.2593	1. Coast Endemic		3. Above 15 years
MDH1201065	Malindi DH	1/24/2012	Malindi	Male	Kilifi	Yes	2-4 weeks	No				No			Fever	3	10	37.6	84	Malaria		4320					Coast Endemic	1	0 - 5 years	wild type/Mutant	Wild type	Wild type	2012-01-24	2012	1	0	0	1-2012	Fever	8.37101	1. Coast Endemic		1. 0 - 5 years
MDH1206082	Malindi DH	6/1/2012	Malindi	Male	Kilifi	Yes	<2weeks	Yes		6	1	No			Fever	2	11	37.7	84	Malaria		65280					Coast Endemic	1	0 - 5 years	undetermined	wild type/Mutant	Wild type	2012-06-01	2012	2	0	2	2-2012	Fever	11.0864	1. Coast Endemic		1. 0 - 5 years
MDH1112053	Malindi DH	12/12/2012	Malindi	Female	Kilifi	No		No				No			Fever	4	45	38.8	76	Malaria		19760					Coast Endemic	14	6 - 15 years	Mutant	Mutant	Wild type	2012-12-12	2012	4	1	1	2-2013	Fever	9.89141	1. Coast Endemic	MDR86	2. 6 - 15 years
MDH1202074	Malindi DH	2/20/2012	Malindi	Female	Kilifi	No		No				No			Fever	3	21	39	90	Malaria		33960					Coast Endemic	8	6 - 15 years	Wild type	Mutant	undetermined	2012-02-20	2012	1	1	0	1-2012	Fever	10.4329	1. Coast Endemic	MDR86	2. 6 - 15 years
MDH1202076	Malindi DH	2/22/2012	Malindi	Male	Kilifi	No		No				No			Fever	5	16	38.3	88	Malaria		13920					Coast Endemic	4	0 - 5 years	Wild type	Wild type	Wild type	2012-02-22	2012	1	0	0	1-2012	Fever	9.54108	1. Coast Endemic		1. 0 - 5 years
MDH1202077	Malindi DH	2/22/2012	Malindi	Female	Kilifi	No		No				No			Coughing	21	24	36.3	116	Malaria		5720					Coast Endemic	9	6 - 15 years	Mutant	Wild type	undetermined	2012-02-22	2012	1	1	1	1-2012	Coughing	8.65172	1. Coast Endemic	CRT76	2. 6 - 15 years
MDH1206090	Malindi DH	6/25/2012	Malindi	Male	Kilifi	Yes	2-4 weeks	Yes	2		0	No			Joint Pains	2	69	36.8	72	Malaria		4160					Coast Endemic	38	Above 15 years	Mutant	Wild type	Wild type	2012-06-25	2012	2	1	1	2-2012	Joint Pains	8.33327	1. Coast Endemic	CRT76	3. Above 15 years
MDH1201058	Malindi DH	1/17/2012	Malindi	Female	Kilifi	No		No				No			Fever	3	7.8	39.5	80	Malaria		77600					Coast Endemic	1	0 - 5 years	Mutant	Mutant	Wild type	2012-01-17	2012	1	1	1	1-2012	Fever	11.2593	1. Coast Endemic	MDR86	1. 0 - 5 years
MDH1206086	Malindi DH	6/8/2012	Malindi	Female	Kilifi	Yes	<2weeks	No				No			Fever	5	12	38.6	86	Malaria		46240					Coast Endemic	3	0 - 5 years	undetermined	Wild type	Mutant	2012-06-08	2012	2	1	2	2-2012	Fever	10.7416	1. Coast Endemic	MDR184	1. 0 - 5 years
MDH1208108	Malindi DH	8/24/2012	Malindi	Female	Kilifi	No		No				No			Fever	3	10	40.3	86	Malaria		49120					Coast Endemic	2	0 - 5 years	undetermined	Wild type	wild type/Mutant	2012-08-24	2012	3	0	2	2-2013	Fever	10.802	1. Coast Endemic		1. 0 - 5 years
MDH1204080	Malindi DH	4/24/2012	Malindi	Female	Kilifi	Yes	1-2 months	No				No			Fever	7	12	38.4	82	Malaria							Coast Endemic	2	0 - 5 years	undetermined	Wild type	undetermined	2012-04-24	2012	2	0	2	2-2012	Fever		1. Coast Endemic		1. 0 - 5 years
MDH1201061	Malindi DH	1/18/2012	Malindi	Female	Kilifi	Yes	2-4 weeks	No				No			Fever	2	31	38.8	80	Malaria		120					Coast Endemic	9	6 - 15 years	wild type/Mutant	undetermined	undetermined	2012-01-18	2012	1	0	0	1-2012	Fever	4.78749	1. Coast Endemic		2. 6 - 15 years
MDH1208110	Malindi DH	8/24/2012	Malindi	Female	Kilifi	No		Yes	2		0	No			Fever	1	16.5	40.1	108	Malaria		61920					Coast Endemic	5	0 - 5 years	undetermined	Wild type	Wild type	2012-08-24	2012	3	0	2	2-2013	Fever	11.0336	1. Coast Endemic		1. 0 - 5 years
MDH1111049	Malindi DH	11/11/2011	Malindi	Male	Kilifi	No		No				No			Fever	4	18	39.7	78	Malaria		117000					Coast Endemic	8	6 - 15 years	Mutant	undetermined	Wild type	2011-11-11	2011	4	1	1	4-2011	Fever	11.6699	1. Coast Endemic	CRT76	2. 6 - 15 years
MDH1208107	Malindi DH	8/21/2012	Malindi	Female	Kilifi	No		Yes	2		0	No			Fever	7	14	39.8	80	Malaria		50720					Coast Endemic	4	0 - 5 years	undetermined	Wild type	Wild type	2012-08-21	2012	3	0	2	2-2013	Fever	10.8341	1. Coast Endemic		1. 0 - 5 years
MDH1112054	Malindi DH	12/13/2011	Malindi	Male	Kilifi	No		No				No			Fever	7	25	39.2	82	Malaria		7360					Coast Endemic	6	6 - 15 years	Wild type	Wild type	Mutant	2011-12-13	2011	4	1	0	4-2011	Fever	8.90382	1. Coast Endemic	MDR184	2. 6 - 15 years
MDH1207094	Malindi DH	7/3/2012	Malindi	Male	Kilifi	No		No				No			Fever	3	14	40.3	86	Malaria		72800					Coast Endemic	2	0 - 5 years	undetermined	Wild type	Wild type	2012-07-03	2012	3	0	2	2-2013	Fever	11.1955	1. Coast Endemic		1. 0 - 5 years
MDH1112056	Malindi DH	12/16/2011	Malindi	Male	Kilifi	No		No				No			Fever	4	63	37.8	74	Malaria		7920					Coast Endemic	32	Above 15 years	wild type/Mutant	Wild type	Wild type	2011-12-16	2011	4	0	0	4-2011	Fever	8.97715	1. Coast Endemic		3. Above 15 years
MDH1112050	Malindi DH	11/4/2011	Malindi	Male	Kilifi	Yes	<2weeks	Yes		4	1	Yes	Artenam	Hospital/Dispensary	Fever	2	27	39.6	80	Malaria		11120					Coast Endemic	8	6 - 15 years	wild type/Mutant	Mutant	undetermined	2011-11-04	2011	4	1	0	4-2011	Fever	9.3165	1. Coast Endemic	MDR86	2. 6 - 15 years
MDH1201059	Malindi DH	1/17/2012	Malindi	Female	Kilifi	No		No				No			Headache	2	84	40	80	Malaria		21600					Coast Endemic	55	Above 15 years	wild type/Mutant	Wild type	Wild type	2012-01-17	2012	1	0	0	1-2012	Headache	9.98045	1. Coast Endemic		3. Above 15 years
MDH1207099	Malindi DH	7/10/2012	Malindi	Male	Kilifi	Yes	1-2 months	No				No			Fever	2	17	39	88	Malaria		66080					Coast Endemic	4	0 - 5 years	undetermined	Wild type	wild type/Mutant	2012-07-10	2012	3	0	2	2-2013	Fever	11.0986	1. Coast Endemic		1. 0 - 5 years
MDH1206087	Malindi DH	6/12/2012	Malindi	Female	Kilifi	No		No				No			Stomachache	3	14	38.4	76	Malaria		40960					Coast Endemic	5	0 - 5 years	undetermined	Mutant	Wild type	2012-06-12	2012	2	1	2	2-2012	Others	10.6204	1. Coast Endemic	MDR86	1. 0 - 5 years
MDH1202073	Malindi DH	2/14/2012	Malindi	Male	Kilifi	No		No				No			Stomachache	14	16	37.8	82	Malaria		2480					Coast Endemic	6	6 - 15 years	wild type/Mutant	Mutant	Wild type	2012-02-14	2012	1	1	0	1-2012	Others	7.81601	1. Coast Endemic	MDR86	2. 6 - 15 years
MDH1201064	Malindi DH	1/23/2012	Malindi	Female	Kilifi	Yes	<2weeks	No				No			Fever	5	10	39.2	86	Malaria		65920					Coast Endemic	0	0 - 5 years	wild type/Mutant	Mutant	wild type/Mutant	2012-01-23	2012	1	1	0	1-2012	Fever	11.0962	1. Coast Endemic	MDR86	1. 0 - 5 years
MDH1208112	Malindi DH	8/28/2012	Malindi	Male	Kilifi	No		Yes			2	Yes	Quinine		Fever	2	14	36.8	70	Malaria		20000					Coast Endemic	3	0 - 5 years	Wild type	Wild type	Wild type	2012-08-28	2012	3	0	0	2-2013	Fever	9.90349	1. Coast Endemic		1. 0 - 5 years
MDH1201062	Malindi DH	1/19/2012	Malindi	Male	Kilifi	Yes	<2weeks	No				No			Vomiting	1	58	37.6	74	Malaria		5600					Coast Endemic	24	Above 15 years	Wild type	Wild type	Wild type	2012-01-19	2012	1	0	0	1-2012	Others	8.63052	1. Coast Endemic		3. Above 15 years
MDH1208109	Malindi DH	8/24/2012	Malindi	Female	Kilifi	No		Yes	1		1	No			Vomiting	3	9	38.8	80	Malaria		29200					Coast Endemic	1	0 - 5 years	undetermined	Wild type	Wild type	2012-08-24	2012	3	0	2	2-2013	Others	10.2819	1. Coast Endemic		1. 0 - 5 years
MDH1202079	Malindi DH	2/28/2012	Malindi	Male	Kilifi	Yes	1-2 months	No				No			Fever	54	14	38	82	Malaria		12240					Coast Endemic	3	0 - 5 years	wild type/Mutant	undetermined	Wild type	2012-02-28	2012	1	0	0	1-2012	Fever	9.41246	1. Coast Endemic		1. 0 - 5 years
MDH1207100	Malindi DH	7/12/2012	Malindi	Male	Kilifi	No		Yes	3		0	No			Headache	3	69	37.7	68	Malaria							Coast Endemic	55	Above 15 years	Mutant	undetermined	wild type/Mutant	2012-07-12	2012	3	1	1	2-2013	Headache		1. Coast Endemic	CRT76	3. Above 15 years
MDH1206085	Malindi DH	6/7/2012	Malindi	Female	Kilifi	No		No				No			Fever	3	10	36.7	82	Malaria		4800					Coast Endemic	3	0 - 5 years	undetermined	Wild type	Mutant	2012-06-07	2012	2	1	2	2-2012	Fever	8.47637	1. Coast Endemic	MDR184	1. 0 - 5 years
MDH1208113	Malindi DH	8/30/2012	Malindi	Male	Kilifi	No		Yes		2	4	No			Fever	7	15	38.7	86	Malaria		14560					Coast Endemic	4	0 - 5 years	undetermined	Mutant	Wild type	2012-08-30	2012	3	1	2	2-2013	Fever	9.58603	1. Coast Endemic	MDR86	1. 0 - 5 years
MDH1207098	Malindi DH	7/10/2012	Malindi	Male	Kilifi	No		No				No			Fever	3	15	37.2	86	Malaria		7880					Coast Endemic	3	0 - 5 years	undetermined	Mutant	wild type/Mutant	2012-07-10	2012	3	1	2	2-2013	Fever	8.97208	1. Coast Endemic	MDR86	1. 0 - 5 years
MDH1112051	Malindi DH	12/4/2011	Malindi	Female	Kilifi	No		No				No			Joint Pains	3	51	36.5	72	Malaria		6720					Coast Endemic	28	Above 15 years	Wild type	Wild type	undetermined	2011-12-04	2011	4	0	0	4-2011	Joint Pains	8.81284	1. Coast Endemic		3. Above 15 years
MDH1201068	Malindi DH	1/31/2012	Malindi	Female	Kilifi	No		Yes			1	Yes	Other	Hospital/Dispensary	Fever	7	15	39	86	Malaria		8560					Coast Endemic	4	0 - 5 years	wild type/Mutant	Wild type	wild type/Mutant	2012-01-31	2012	1	0	0	1-2012	Fever	9.05486	1. Coast Endemic		1. 0 - 5 years
MDH1202072	Malindi DH	2/13/2012	Malindi	Female	Kilifi	No		No				No			Stomachache	4	10	39	88	Malaria	Gastroenteritis						Coast Endemic	1	0 - 5 years	Wild type	undetermined	undetermined	2012-02-13	2012	1	0	0	1-2012	Others		1. Coast Endemic		1. 0 - 5 years
MDH1208105	Malindi DH	8/13/2012	Malindi	Male	Kilifi	Yes	1-2 months	No				No			Coughing	7	12	37.1	86	Malaria		8400					Coast Endemic	3	0 - 5 years	undetermined	Wild type	Wild type	2012-08-13	2012	3	0	2	2-2013	Coughing	9.03599	1. Coast Endemic		1. 0 - 5 years
MDH1112055	Malindi DH	12/14/2011	Malindi	Male	Kilifi	No		No				No			Dizziness	3	55	39.1	76	Malaria		26160					Coast Endemic	14	6 - 15 years	wild type/Mutant	Wild type	undetermined	2011-12-14	2011	4	0	0	4-2011	Others	10.172	1. Coast Endemic		2. 6 - 15 years
MDH1207102	Malindi DH	7/18/2012	Malindi	Female	Kilifi	No		Yes	1		1	No			Fever	2	11	36.2	88	Malaria		1040					Coast Endemic			Mutant	Wild type	Wild type	2012-07-18	2012	3	1	1	2-2013	Fever	6.94698	1. Coast Endemic	CRT76
MDH1206091	Malindi DH	6/25/2012	Malindi	Male	Kilifi	No		No				No			Fever	2	8.9	37.3	82	Malaria	RTI						Coast Endemic	0	0 - 5 years	undetermined	Mutant	Wild type	2012-06-25	2012	2	1	2	2-2012	Fever		1. Coast Endemic	MDR86	1. 0 - 5 years
MDH1202075	Malindi DH	2/22/2012	Malindi	Male	Kilifi	Yes	2-4 weeks	No				No			Other	2	81	36.5	80	Malaria		320					Coast Endemic	43	Above 15 years	Mutant	undetermined	undetermined	2012-02-22	2012	1	1	1	1-2012	Others	5.76832	1. Coast Endemic	CRT76	3. Above 15 years
MDH1206083	Malindi DH	6/5/2012	Malindi	Male	Kilifi	No		No				No			Fever	3	10	39.2	84	Malaria		47680					Coast Endemic	1	0 - 5 years	undetermined	wild type/Mutant	Wild type	2012-06-05	2012	2	0	2	2-2012	Fever	10.7723	1. Coast Endemic		1. 0 - 5 years
MDH1208114	Malindi DH	8/30/2012	Malindi	Female	Kilifi	No		Yes	3		0	No			Headache	7	68	39.1	78	Malaria		19680					Coast Endemic	30	Above 15 years	undetermined	Mutant	Wild type	2012-08-30	2012	3	1	2	2-2013	Headache	9.88736	1. Coast Endemic	MDR86	3. Above 15 years
MDH1206084	Malindi DH	6/5/2012	Malindi	Female	Kilifi	No		Yes	1		1	No			Dizziness	3	67	37.8	76	Malaria		800					Coast Endemic	22	Above 15 years	undetermined	Wild type	Wild type	2012-06-05	2012	2	0	2	2-2012	Others	6.68461	1. Coast Endemic		3. Above 15 years
MDH1207097	Malindi DH	7/6/2012	Malindi	Male	Kilifi	No		No				No			Fever	14	13	37.8	84	Malaria		30880					Coast Endemic	2	0 - 5 years	undetermined	Wild type	wild type/Mutant	2012-07-06	2012	3	0	2	2-2013	Fever	10.3379	1. Coast Endemic		1. 0 - 5 years
MDH1206088	Malindi DH	6/14/2012	Kilifi	Female	Kilifi	No		Yes	8		1	No			Headache	3	48	38.2	74	Malaria		58400					Coast Endemic	60	Above 15 years	Mutant	Wild type	Wild type	2012-06-14	2012	2	1	1	2-2012	Headache	10.9751	1. Coast Endemic	CRT76	3. Above 15 years
MDH1207095	Malindi DH	7/5/2012	Malindi	Female	Kilifi	No		No				No			Fever	3	10	36.8	80	Malaria							Coast Endemic	2	0 - 5 years	undetermined	Mutant	undetermined	2012-07-05	2012	3	1	2	2-2013	Fever		1. Coast Endemic	MDR86	1. 0 - 5 years
MDH1201067	Malindi DH	1/30/2012	Malindi	Male	Kilifi	No		No				No			Fever	5	37	38.9	80	Malaria		21280					Coast Endemic	13	6 - 15 years	Mutant	Wild type	Wild type	2012-01-30	2012	1	1	1	1-2012	Fever	9.96552	1. Coast Endemic	CRT76	2. 6 - 15 years
MDH1207096	Malindi DH	7/5/2012	Malindi	Female	Kilifi	No		No				No			Fever	7	10	37.2	86	Malaria		6640					Coast Endemic	2	0 - 5 years	undetermined	wild type/Mutant	Wild type	2012-07-05	2012	3	0	2	2-2013	Fever	8.80087	1. Coast Endemic		1. 0 - 5 years
MDH1208104	Malindi DH	8/2/2012	Malindi	Female	Kilifi	No		Yes			1	Yes	Other	Hospital/Dispensary	Fever	4	19	36.7	78	Malaria		62160					Coast Endemic	7	6 - 15 years	wild type/Mutant	Wild type	Wild type	2012-08-02	2012	3	0	0	2-2013	Fever	11.0375	1. Coast Endemic		2. 6 - 15 years
MDH1207101	Malindi DH	7/12/2012	Malindi	Male	Kilifi	No		No				No			Fever	3	28	38.8	78	Malaria		42720					Coast Endemic	10	6 - 15 years	undetermined	Wild type	Wild type	2012-07-12	2012	3	0	2	2-2013	Fever	10.6624	1. Coast Endemic		2. 6 - 15 years
MDH1208111	Malindi DH	8/28/2012	Malindi	Female	Kilifi	No		No				No			Fever	3	16	39.3	80	Malaria		25120					Coast Endemic	5	0 - 5 years	wild type/Mutant	Mutant	Wild type	2012-08-28	2012	3	1	0	2-2013	Fever	10.1314	1. Coast Endemic	MDR86	1. 0 - 5 years
MDH1201063	Malindi DH	1/23/2012	Malindi	Male	Kilifi	Yes	<2weeks	No				No			Fever	5	13	36.7	80	Malaria		2080					Coast Endemic	3	0 - 5 years	wild type/Mutant	wild type/Mutant	wild type/Mutant	2012-01-23	2012	1	0	0	1-2012	Fever	7.64012	1. Coast Endemic		1. 0 - 5 years
MDH1207103	Malindi DH	7/23/2012	Malindi	Female	Kilifi	Yes	2-4 weeks	Yes	2		0	No			Joint Pains	3	89	39.8	80	Malaria		6720					Coast Endemic	61	Above 15 years	undetermined	Wild type	Wild type	2012-07-23	2012	3	0	2	2-2013	Joint Pains	8.81284	1. Coast Endemic		3. Above 15 years
KSI1401457	Kisii DH	1/14/2014	KISII	Male	Kisii	No		Yes	3		1	No			Joint Pains	3	58	37.2	80			1000					Highland Epidemic	40	Above 15 years	Wild type	Wild type	Mutant	2014-01-14	2014	1	1	0	1-2014	Joint Pains	6.90776	2. Highland Epidemic	MDR184	3. Above 15 years
KSI1208279	Kisii DH	8/21/2012	Kisii	Female	Kisii	No		Yes		8	2	No			Fever	3	21	39.7	84	Malaria		47250					Highland Epidemic	7	6 - 15 years	undetermined	Wild type	Mutant	2012-08-21	2012	3	1	2	2-2013	Fever	10.7632	2. Highland Epidemic	MDR184	2. 6 - 15 years
KCH1105144	Kericho DH	5/12/2011	Kericho	Male	Kericho	Yes	2-4 weeks	Yes	2			No			Fever	2	17	39.3	100	Malaria		40500					Highland Epidemic	4	0 - 5 years	Wild type	Wild type	Wild type	2011-05-12	2011	2	0	0	2-2013	Fever	10.6091	2. Highland Epidemic		1. 0 - 5 years
KSI1208282	Kisii DH	8/22/2012	Kisii	Female	Kisii	No		Yes		8	2	No			Fever	3	12	38.2	74	Malaria		1280					Highland Epidemic	4	0 - 5 years	Wild type	Wild type	Wild type	2012-08-22	2012	3	0	0	2-2013	Fever	7.15462	2. Highland Epidemic		1. 0 - 5 years
KSI1201234	Kisii DH	1/31/2012	Kisii	Female	Kisii	No		No				No			Fever	3	68	40.4	74	Malaria		5920					Highland Epidemic	49	Above 15 years	Wild type	Wild type	Mutant	2012-01-31	2012	1	1	0	1-2012	Fever	8.68609	2. Highland Epidemic	MDR184	3. Above 15 years
KSI1201229	Kisii DH	1/18/2012	Kisii	Male	Kisii	No		Yes	3		1	No			Fever	3	32	38.7	84	Malaria		2240					Highland Epidemic	10	6 - 15 years	Mutant	Wild type	Mutant	2012-01-18	2012	1	1	1	1-2012	Fever	7.71423	2. Highland Epidemic	MDR184	2. 6 - 15 years
KSI1201226	Kisii DH	1/18/2012	Kisii	Male	Kisii	No		Yes	2		1	No			Fever	3	32.5	40	84	Malaria		1400					Highland Epidemic	14	6 - 15 years	wild type/Mutant	Wild type	wild type/Mutant	2012-01-18	2012	1	0	0	1-2012	Fever	7.24423	2. Highland Epidemic		2. 6 - 15 years
KCH0804002	Kericho DH	4/7/2008	Kericho	Female	Kericho	Yes	<2weeks	No				No			Vomiting	6	12	36.1	102	Clinical Malaria	RTI	25600					Highland Epidemic	2	0 - 5 years	Mutant	wild type/Mutant	Wild type	2008-04-07	2008	2	1	1	2-2008	Others	10.1503	2. Highland Epidemic	CRT76	1. 0 - 5 years
KSI1405555	Kisii DH	5/15/2014	KISII	Female	Kisii	No		Yes	5		1	No			Fever	2	52	38.6	72	Malaria		6760					Highland Epidemic	17	Above 15 years	Wild type	Wild type	Mutant	2014-05-15	2014	2	1	0	2-2014	Fever	8.81878	2. Highland Epidemic	MDR184	3. Above 15 years
KSI1310423	Kisii DH	10/16/2013	KISII	Male	Kisii	No		No				No			Fever	6	9.5	40	96	Malaria		177750					Highland Epidemic	0	0 - 5 years	Wild type	Wild type	Wild type	2013-10-16	2013	4	0	0	4-2013	Fever	12.0881	2. Highland Epidemic		1. 0 - 5 years
KSI0807001	Kisii DH	7/8/2008	KISII	Female	Kisii	Yes	2-4 weeks	No				No			Fever	4	13	39.2	102	Malaria							Highland Epidemic	1	0 - 5 years	wild type/Mutant	Wild type	Wild type	2008-07-08	2008	3	0	0	3-2008	Fever		2. Highland Epidemic		1. 0 - 5 years
KCH1005113	Kericho DH	5/17/2010	Kericho	Male	Kericho	Yes	2-4 weeks	No				No			Headache	6	54	37.7	84	Malaria		18000					Highland Epidemic	13	6 - 15 years	Wild type	undetermined	Wild type	2010-05-17	2010	2	0	0	2-2010	Headache	9.79813	2. Highland Epidemic		2. 6 - 15 years
KCH0805010	Kericho DH	5/15/2008	Kericho	Male	Kericho	Yes	<2weeks	No				No			Fever	1	26	39.2	87	Clinical Malaria		317250					Highland Epidemic	8	6 - 15 years	Wild type	wild type/Mutant	wild type/Mutant	2008-05-15	2008	2	0	0	2-2008	Fever	12.6674	2. Highland Epidemic		2. 6 - 15 years
KCH0804008	Kericho DH	4/22/2008	Kericho	Female	Kericho	Yes	<2weeks	No				No			Fever	8	17	37	96	Clinical Malaria		1440					Highland Epidemic	3	0 - 5 years	Mutant	Wild type	wild type/Mutant	2008-04-22	2008	2	1	1	2-2008	Fever	7.2724	2. Highland Epidemic	CRT76	1. 0 - 5 years
KSI0805003	Kisii DH	5/20/2008	KISII	Male	Kisii	No		Yes		1	2	Yes	Other	Self	Vomiting	1	12.5	39.7	102	Malaria		6560					Highland Epidemic	2	0 - 5 years	Mutant	Wild type	Wild type	2008-05-20	2008	2	1	1	2-2008	Others	8.78875	2. Highland Epidemic	CRT76	1. 0 - 5 years
KCH0804009	Kericho DH	4/22/2008	Kericho	Female	Kericho	Yes	1-2 months	Yes		4	2	No			Fever		10	37.5	98	Clinical Malaria	RTI	8360					Highland Epidemic	1	0 - 5 years	undetermined	Mutant	Wild type	2008-04-22	2008	2	1	2	2-2008	Fever	9.03121	2. Highland Epidemic	MDR86	1. 0 - 5 years
KCH0804010	Kericho DH	4/23/2008	Kericho	Female	Kericho	Yes	<2weeks	Yes		1	2	Yes	Other	Hospital/Dispensary	Fever	3	20	38	86	Malaria		37800					Highland Epidemic	8	6 - 15 years	Mutant	Mutant	Wild type	2008-04-23	2008	2	1	1	2-2008	Fever	10.5401	2. Highland Epidemic	MDR86	2. 6 - 15 years
KSI1405542	Kisii DH	5/6/2014	KISII	Male	Kisii	No		Yes	2		1	No			Fever	3	26	39	70			454500					Highland Epidemic	8	6 - 15 years	Wild type	Wild type	Wild type	2014-05-06	2014	2	0	0	2-2014	Fever	13.027	2. Highland Epidemic		2. 6 - 15 years
KCH1101136	Kericho DH	1/10/2011	Kericho	Male	Kericho	No		No				No			Fever	6	22	38.5	99	Malaria		2040					Highland Epidemic	6	6 - 15 years	Mutant	Wild type	wild type/Mutant	2011-01-10	2011	1	1	1	1-2011	Fever	7.62071	2. Highland Epidemic	CRT76	2. 6 - 15 years
KSI1202242	Kisii DH	2/29/2012	Kisii	Female	Kisii	No		Yes	1		1	No			Fever	3	17	38.9	78	Malaria		440					Highland Epidemic	3	0 - 5 years	Mutant	undetermined	Wild type	2012-02-29	2012	1	1	1	1-2012	Fever	6.08677	2. Highland Epidemic	CRT76	1. 0 - 5 years
KSI1401474	Kisii DH	1/30/2014	KISII	Female	Kisii	No		Yes	1		1	No			Fever	3	15.6	40	84	Malaria		1320					Highland Epidemic	4	0 - 5 years	wild type/Mutant	Wild type	Wild type	2014-01-30	2014	1	0	0	1-2014	Fever	7.18539	2. Highland Epidemic		1. 0 - 5 years
KSI1304329	Kisii DH	4/22/2013	Kisii	Male	Kisii	No		Yes		8	2	No			Fever	2	14	38.8	78	Malaria		14240					Highland Epidemic	3	0 - 5 years	Wild type	Wild type	Mutant	2013-04-22	2013	2	1	0	2-2013	Fever	9.56381	2. Highland Epidemic	MDR184	1. 0 - 5 years
KSI1110207	Kisii DH	10/25/2011	Kisii	Male	Kisii	No		Yes		5	2	No			Headache	2	25	36.7	64	Malaria		6960					Highland Epidemic	8	6 - 15 years	Mutant	Wild type	Mutant	2011-10-25	2011	4	1	1	4-2011	Headache	8.84793	2. Highland Epidemic	MDR184	2. 6 - 15 years
KSI0807004	Kisii DH	7/29/2008	KISII	Male	Kisii	Yes	<2weeks	Yes			2	No			Joint Pains	2	70	38	90	Malaria		4040					Highland Epidemic	28	Above 15 years	Mutant	Mutant	undetermined	2008-07-29	2008	3	1	1	3-2008	Joint Pains	8.304	2. Highland Epidemic	MDR86	3. Above 15 years
KCH1207176	Kericho DH	7/19/2012	Kericho	Female	Kericho	No		No				No			Joint Pains	4	54	37.8	85	Malaria							Highland Epidemic	26	Above 15 years	undetermined	Wild type	wild type/Mutant	2012-07-19	2012	3	0	2	2-2013	Joint Pains		2. Highland Epidemic		3. Above 15 years
KSI1203244	Kisii DH	3/1/2012	Kisii	Female	Kisii	Yes	1-2 months	Yes		2	2	No			Fever	3	13	37.8	88	Malaria		76500					Highland Epidemic	3	0 - 5 years	wild type/Mutant	undetermined	Wild type	2012-03-01	2012	1	0	0	1-2012	Fever	11.245	2. Highland Epidemic		1. 0 - 5 years
KSI1201223	Kisii DH	1/16/2012	Kisii	Female	Kisii	No		Yes		3	3	No			Fever	2	15.5	40.1	84	Malaria		200250					Highland Epidemic	4	0 - 5 years	Wild type	Wild type	Wild type	2012-01-16	2012	1	0	0	1-2012	Fever	12.2073	2. Highland Epidemic		1. 0 - 5 years
KSI1408628	Kisii DH	8/4/2014	KISII	Female	Kisii	No		Yes	1		1	No			Fever		14.5	38.9	70	Malaria		252000					Highland Epidemic	4	0 - 5 years	Wild type	Wild type	Wild type	2014-08-04	2014	3	0	0	3-2014	Fever	12.4372	2. Highland Epidemic		1. 0 - 5 years
KCH1402242	Kericho DH	2/20/2014	Kericho	Female	Kericho	No		No				No			Joint Pains	2	54	36.8	74	Malaria							Highland Epidemic			undetermined	undetermined	Wild type	2014-02-20	2014	1	0	2	1-2014	Joint Pains		2. Highland Epidemic
KCH0809040	Kericho DH	9/24/2008	Kericho	Male	Kericho	Yes	<2weeks	Yes		3	2	No			Fever	1	10	38.9	108	Malaria		2560					Highland Epidemic	2	0 - 5 years	Mutant	wild type/Mutant	Wild type	2008-09-24	2008	3	1	1	3-2008	Fever	7.84776	2. Highland Epidemic	CRT76	1. 0 - 5 years
KSI1404527	Kisii DH	4/3/2014	KISII	Male	Kisii	No		Yes	2		1	No			Fever	2	25	38.1	78	Malaria		5880					Highland Epidemic	7	6 - 15 years	Wild type	Wild type	Mutant	2014-04-03	2014	2	1	0	2-2014	Fever	8.67931	2. Highland Epidemic	MDR184	2. 6 - 15 years
KSI1401472	Kisii DH	1/29/2014	KISII	Male	Kisii	No		Yes		6	2	No			Fever	2	29	39.7	88	Malaria		4920					Highland Epidemic	11	6 - 15 years	Wild type	Wild type	Wild type	2014-01-29	2014	1	0	0	1-2014	Fever	8.50106	2. Highland Epidemic		2. 6 - 15 years
KSI1203247	Kisii DH	3/13/2012	Kisii	Male	Kisii	No		Yes	2		1	No			Fever	4	22.5	38.7	72	Malaria		207000					Highland Epidemic	10	6 - 15 years	Wild type	Wild type	Mutant	2012-03-13	2012	1	1	0	1-2012	Fever	12.2405	2. Highland Epidemic	MDR184	2. 6 - 15 years
KSI1202239	Kisii DH	2/16/2012	Kisii	Female	Kisii	No		Yes	4		1	No			Fever	2	60	38.9	74	Malaria							Highland Epidemic	25	Above 15 years	undetermined	Wild type	Wild type	2012-02-16	2012	1	0	2	1-2012	Fever		2. Highland Epidemic		3. Above 15 years
KSI1402493	Kisii DH	2/24/2014	KISII	Female	Kisii	No		Yes	2		1	No			Headache	2	27	36.4	74	Malaria		7360					Highland Epidemic	10	6 - 15 years	Mutant	Wild type	Mutant	2014-02-24	2014	1	1	1	1-2014	Headache	8.90382	2. Highland Epidemic	MDR184	2. 6 - 15 years
KSI1407624	Kisii DH	7/30/2014	KISII	Male	Kisii	No		Yes	2		1	No			Fever	2	36	38.6	80	Malaria		13200					Highland Epidemic	5	0 - 5 years	Wild type	Wild type	Mutant	2014-07-30	2014	3	1	0	3-2014	Fever	9.48797	2. Highland Epidemic	MDR184	1. 0 - 5 years
KSI1406609	Kisii DH	7/30/2014	KISII	Male	Kisii	No		Yes		6	2	No			Fever	2	17	40	74	Malaria		13160					Highland Epidemic	4	0 - 5 years	Wild type	Wild type	Wild type	2014-07-30	2014	3	0	0	3-2014	Fever	9.48494	2. Highland Epidemic		1. 0 - 5 years
KCH1407265	Kericho DH	7/17/2014	Kericho	Female	Kericho	Yes	<2weeks	Yes	1		1	No			Headache	4	50	38	82	Malaria		1400					Highland Epidemic	19	Above 15 years	Wild type	Wild type	Wild type	2014-07-17	2014	3	0	0	3-2014	Headache	7.24423	2. Highland Epidemic		3. Above 15 years
KSI1406603	Kisii DH	7/25/2014	KISII	Male	Kisii	No		Yes		7	7	No			Headache	2	17	37.3	78	Malaria		283500					Highland Epidemic	4	0 - 5 years	Wild type	Wild type	Wild type	2014-07-25	2014	3	0	0	3-2014	Headache	12.555	2. Highland Epidemic		1. 0 - 5 years
KCH1407267	Kericho DH	6/30/2014	Kericho	Female	Kericho	Yes	2-4 weeks	No				No			Headache	2	18	38.8	105	Clinical Malaria		1120					Highland Epidemic	5	0 - 5 years	Wild type	Wild type	Mutant	2014-06-30	2014	2	1	0	2-2014	Headache	7.02108	2. Highland Epidemic	MDR184	1. 0 - 5 years
KSI1406601	Kisii DH	6/24/2014	KISII	Male	Kisii	No		Yes		8	2	No			Fever	2	75	38.6	70	Malaria		7040					Highland Epidemic	2	0 - 5 years	Wild type	Wild type	Mutant	2014-06-24	2014	2	1	0	2-2014	Fever	8.85936	2. Highland Epidemic	MDR184	1. 0 - 5 years
KCH1006121	Kericho DH	6/10/2010	Kericho	Male	Kericho	Yes	2-4 weeks	No				No			Headache	2	81	37.9	89	Malaria		1320					Highland Epidemic	35	Above 15 years	Mutant	Mutant	Wild type	2010-06-10	2010	2	1	1	2-2010	Headache	7.18539	2. Highland Epidemic	MDR86	3. Above 15 years
KSI1406596	Kisii DH	6/18/2014	KISII	Female	Kisii	No		Yes		3	2	No			Dizziness	2	66	37.8	72	Malaria		3240					Highland Epidemic	21	Above 15 years	Wild type	Wild type	Wild type	2014-06-18	2014	2	0	0	2-2014	Others	8.08333	2. Highland Epidemic		3. Above 15 years
KSI1406578	Kisii DH	4/4/2014	KISII	Male	Kisii	No		Yes		8	2	No			Fever	2	14	38.2	70	Malaria		177750					Highland Epidemic	3	0 - 5 years	Wild type	Wild type	Mutant	2014-04-04	2014	2	1	0	2-2014	Fever	12.0881	2. Highland Epidemic	MDR184	1. 0 - 5 years
KSI1406593	Kisii DH	6/18/2014	KISII	Male	Kisii	No		Yes		6	2	No			Fever	2	13	39.9	70	Malaria		171000					Highland Epidemic	2	0 - 5 years	Wild type	Wild type	Mutant	2014-06-18	2014	2	1	0	2-2014	Fever	12.0494	2. Highland Epidemic	MDR184	1. 0 - 5 years
KSI1406592	Kisii DH	6/17/2014	KISII	Male	Kisii	No		Yes		8	2	No			Fever	2	17	38.4	72	Malaria		177750					Highland Epidemic	4	0 - 5 years	Wild type	Wild type	Wild type	2014-06-17	2014	2	0	0	2-2014	Fever	12.0881	2. Highland Epidemic		1. 0 - 5 years
KSI1305352	Kisii DH	5/20/2013	Kisii	Male	Kisii	Yes		Yes	1		1	No			Fever	3	68	38.8	80	Malaria		12640					Highland Epidemic	18	Above 15 years	Wild type	Wild type	Wild type	2013-05-20	2013	2	0	0	2-2013	Fever	9.44462	2. Highland Epidemic		3. Above 15 years
KCH0809041	Kericho DH	9/25/2008	Kericho	Female	Kericho	Yes	2-4 weeks	Yes			5	Yes			Headache	3	16	38.4	96	Malaria		1320					Highland Epidemic	5	0 - 5 years	wild type/Mutant	undetermined	Wild type	2008-09-25	2008	3	0	0	3-2008	Headache	7.18539	2. Highland Epidemic		1. 0 - 5 years
KSI1403511	Kisii DH	3/13/2014	KISII	Female	Kisii	No		Yes	3		1	No			Fever	2	28	38.7	74	Malaria		9040					Highland Epidemic	8	6 - 15 years	Wild type	Wild type	Mutant	2014-03-13	2014	1	1	0	1-2014	Fever	9.10941	2. Highland Epidemic	MDR184	2. 6 - 15 years
KSI1202235	Kisii DH	2/2/2012	Kisii	Male	Kisii	No		Yes	2		1	No			Fever	4	16	38.6	74	Malaria		231750					Highland Epidemic	5	0 - 5 years	Mutant	Wild type	Wild type	2012-02-02	2012	1	1	1	1-2012	Fever	12.3534	2. Highland Epidemic	CRT76	1. 0 - 5 years
KSI1406583	Kisii DH	6/5/2014	KISII	Female	Kisii	No		Yes	3		1	No			Fever	3	35	40.2	68	Malaria		10760					Highland Epidemic	11	6 - 15 years	Wild type	Wild type	Wild type	2014-06-05	2014	2	0	0	2-2014	Fever	9.28359	2. Highland Epidemic		2. 6 - 15 years
KSI1406582	Kisii DH	6/5/2014	KISII	Male	Kisii	No		Yes	1		1	No			Fever	2	13.5	38.7	64	Malaria		11920					Highland Epidemic	3	0 - 5 years	Wild type	Wild type	Wild type	2014-06-05	2014	2	0	0	2-2014	Fever	9.38597	2. Highland Epidemic		1. 0 - 5 years
KSI1406581	Kisii DH	7/5/2014	KISII	Female	Kisii	No		Yes		6	2	No			Fever	2	11	39.1	76	Malaria		10760					Highland Epidemic	2	0 - 5 years	Wild type	Wild type	Mutant	2014-07-05	2014	3	1	0	3-2014	Fever	9.28359	2. Highland Epidemic	MDR184	1. 0 - 5 years
KCH1309227	Kericho DH	9/19/2013	Kericho	Male	Kericho	Yes	<2weeks	Yes		3	3	Yes	Other	Hospital/Dispensary	Diarrhea	1	62	38.7	81	Malaria		1000					Highland Epidemic	38	Above 15 years	Wild type	Wild type	Mutant	2013-09-19	2013	3	1	0	3-2013	Others	6.90776	2. Highland Epidemic	MDR184	3. Above 15 years
KSI1311445	Kisii DH	11/27/2013	KISII	Male	Kisii	No		Yes	3		1	No			Fever	5	51	37.7	78	Malaria		7240					Highland Epidemic	55	Above 15 years	Wild type	Wild type	Mutant	2013-11-27	2013	4	1	0	4-2013	Fever	8.88738	2. Highland Epidemic	MDR184	3. Above 15 years
KCH1004100	Kericho DH	4/12/2010	Kericho	Male	Kericho	Yes	2-4 weeks	Yes	1		1	No			Fever	7	20	39.7	88	Malaria		360					Highland Epidemic	5	0 - 5 years	Wild type	Wild type	Wild type	2010-04-12	2010	2	0	0	2-2010	Fever	5.8861	2. Highland Epidemic		1. 0 - 5 years
KSI0808001	Kisii DH	8/5/2008	KISII	Female	Kisii	No		Yes		6	1	No			Headache	1	60	38.1	96	Malaria		2040					Highland Epidemic	20	Above 15 years	Mutant	wild type/Mutant	wild type/Mutant	2008-08-05	2008	3	1	1	3-2008	Headache	7.62071	2. Highland Epidemic	CRT76	3. Above 15 years
KSI1304332	Kisii DH	4/23/2013	Kisii	Female	Kisii	No		Yes	3		1	No			Headache	2	85	39.1	74	Malaria		480					Highland Epidemic	39	Above 15 years	Wild type	Wild type	Wild type	2013-04-23	2013	2	0	0	2-2013	Headache	6.17379	2. Highland Epidemic		3. Above 15 years
KCH1104140	Kericho DH	4/7/2011	Kericho	Female	Kericho	Yes	<2weeks	Yes	2			No			Headache	2	73	37	90	Malaria		1400					Highland Epidemic	21	Above 15 years	Wild type	wild type/Mutant	wild type/Mutant	2011-04-07	2011	2	0	0	2-2013	Headache	7.24423	2. Highland Epidemic		3. Above 15 years
KSI1312447	Kisii DH	12/3/2013	KISII	Female	Kisii	No		No				No			Fever	2	15.5	39.3	78	Malaria		4360					Highland Epidemic	4	0 - 5 years	Wild type	Wild type	Mutant	2013-12-03	2013	4	1	0	4-2013	Fever	8.38023	2. Highland Epidemic	MDR184	1. 0 - 5 years
KCH1207178	Kericho DH	7/31/2012	Kericho	Male	Kericho	Yes	<2weeks	Yes		6	3	No			Fever	3	33	40.2	90	Malaria		2240					Highland Epidemic	9	6 - 15 years	undetermined	Wild type	Wild type	2012-07-31	2012	3	0	2	2-2013	Fever	7.71423	2. Highland Epidemic		2. 6 - 15 years
KSI0809002	Kisii DH	9/8/2008	KISII	Male	Kisii	No		Yes	3			No			Jaundice	5	15	38.6	94	Malaria		3400					Highland Epidemic	5	0 - 5 years	undetermined	wild type/Mutant	wild type/Mutant	2008-09-08	2008	3	0	2	3-2008	Others	8.13153	2. Highland Epidemic		1. 0 - 5 years
KCH1202163	Kericho DH	2/1/2012	Kericho	Male	Kericho	Yes	2-4 weeks	No				No			Headache	4	56	37.4	80	Clinical Malaria	Typhoid	640					Highland Epidemic	34	Above 15 years	wild type/Mutant	Wild type	wild type/Mutant	2012-02-01	2012	1	0	0	1-2012	Headache	6.46147	2. Highland Epidemic		3. Above 15 years
KSI1405565	Kisii DH	5/22/2014	KISII	Male	Kisii	No		Yes	3		1	No			Fever	2	20	39.6	80	Malaria		14760					Highland Epidemic	10	6 - 15 years	Wild type	Wild type	Wild type	2014-05-22	2014	2	0	0	2-2014	Fever	9.59968	2. Highland Epidemic		2. 6 - 15 years
KSI1304330	Kisii DH	4/22/2013	Migori	Female	Migori	No		Yes	2		1	No			Fever	3	50	38.9	88	Malaria		2720					Highland Epidemic	46	Above 15 years	Wild type	Wild type	Mutant	2013-04-22	2013	2	1	0	2-2013	Fever	7.90839	2. Highland Epidemic	MDR184	3. Above 15 years
KSI0804005	Kisii DH	4/7/2008	KISII	Male	Kisii	Yes	2-4 weeks	No				No			Fever	1	12	37.9	110	Malaria		5720					Highland Epidemic	3	0 - 5 years	Mutant	wild type/Mutant	Wild type	2008-04-07	2008	2	1	1	2-2008	Fever	8.65172	2. Highland Epidemic	CRT76	1. 0 - 5 years
KSI0808004	Kisii DH	8/19/2008	MIGORI	Male	Migori	No		Yes		2	1	No			Fever	4	13	37.9	100	Malaria		4560					Highland Epidemic	3	0 - 5 years	wild type/Mutant	Wild type	Wild type	2008-08-19	2008	3	0	0	3-2008	Fever	8.42508	2. Highland Epidemic		1. 0 - 5 years
KSI1408627	Kisii DH	8/4/2014	KISII	Female	Kisii	No		Yes		6	1	No			Fever	2	7.9	39.2	80	Malaria		15480					Highland Epidemic	1	0 - 5 years	Wild type	Wild type	Wild type	2014-08-04	2014	3	0	0	3-2014	Fever	9.6473	2. Highland Epidemic		1. 0 - 5 years
KSI1201227	Kisii DH	1/18/2012	Kisii	Female	Kisii	No		Yes	1		1	No			Headache	2	15	35.1	68	Malaria		1200					Highland Epidemic	5	0 - 5 years	Wild type	Wild type	wild type/Mutant	2012-01-18	2012	1	0	0	1-2012	Headache	7.09008	2. Highland Epidemic		1. 0 - 5 years
KCH0805004	Kericho DH	4/6/2008	Kericho	Male	Kericho	No		Yes	1		2	Yes	Quinine	Hospital/Dispensary	Fever	5	12	38.6	98	Malaria		130500					Highland Epidemic			Mutant	wild type/Mutant	wild type/Mutant	2008-04-06	2008	2	1	1	2-2008	Fever	11.7791	2. Highland Epidemic	CRT76
KCH1407266	Kericho DH	6/24/2014	Kericho	Female	Kericho	Yes	<2weeks	No				No			Fever	4	10	38.7	109	Clinical Malaria	Anaemia						Highland Epidemic	1	0 - 5 years	Wild type	Wild type	wild type/Mutant	2014-06-24	2014	2	0	0	2-2014	Fever		2. Highland Epidemic		1. 0 - 5 years
KSI1401465	Kisii DH	1/21/2014	KISII	Female	Kisii	No		Yes		8	2	No			Fever	1	21	39.2	84	Malaria		5720					Highland Epidemic	7	6 - 15 years	Wild type	Wild type	wild type/Mutant	2014-01-21	2014	1	0	0	1-2014	Fever	8.65172	2. Highland Epidemic		2. 6 - 15 years
KSI1405550	Kisii DH	5/12/2014	KISII	Male	Kisii	No		Yes		6	2	No			Fever	3	14	39.9	78	Malaria		11680					Highland Epidemic	2	0 - 5 years	Wild type	Wild type	Mutant	2014-05-12	2014	2	1	0	2-2014	Fever	9.36563	2. Highland Epidemic	MDR184	1. 0 - 5 years
KSI1311443	Kisii DH	11/21/2013	KISII	Male	Kisii	No		Yes		8	3	No			Fever	3	12	39.2	84	Malaria		168750					Highland Epidemic	2	0 - 5 years	Wild type	Wild type	Mutant	2013-11-21	2013	4	1	0	4-2013	Fever	12.0362	2. Highland Epidemic	MDR184	1. 0 - 5 years
KCH1002088	Kericho DH	2/22/2010	Kericho	Male	Kericho	No		No				No			Vomiting	5	27		82	Malaria		2920					Highland Epidemic	1	0 - 5 years	Mutant	Wild type	Mutant	2010-02-22	2010	1	1	1	1-2010	Others	7.97934	2. Highland Epidemic	MDR184	1. 0 - 5 years
KSI1401453	Kisii DH	1/10/2014	KISII	Female	Kisii	No		Yes		1	2	Yes	Other	Hospital/Dispensary	Headache	2	21	36.9	74	Malaria		267750					Highland Epidemic	8	6 - 15 years	Wild type	Wild type	Mutant	2014-01-10	2014	1	1	0	1-2014	Headache	12.4978	2. Highland Epidemic	MDR184	2. 6 - 15 years
KCH1406263	Kericho DH	6/30/2014	Kericho	Female	Kericho	No		No				No			Headache	2	55	37.4	77	Malaria							Highland Epidemic	24	Above 15 years	Wild type	Wild type	Mutant	2014-06-30	2014	2	1	0	2-2014	Headache		2. Highland Epidemic	MDR184	3. Above 15 years
KSI1404539	Kisii DH	4/29/2014	KISII	Male	Kisii	No		Yes		6	1	No			Fever	2	11	38.3	70	Malaria		7680					Highland Epidemic	1	0 - 5 years	Wild type	Wild type	wild type/Mutant	2014-04-29	2014	2	0	0	2-2014	Fever	8.94637	2. Highland Epidemic		1. 0 - 5 years
KSI1401454	Kisii DH	1/13/2014	KISII	Female	Kisii	No		Yes		2	3	Yes	Other	Hospital/Dispensary	Stomachache	2	15.5	36.3	68	Malaria		189000					Highland Epidemic	6	6 - 15 years	Wild type	Wild type	Mutant	2014-01-13	2014	1	1	0	1-2014	Others	12.1495	2. Highland Epidemic	MDR184	2. 6 - 15 years
KSI1205265	Kisii DH	5/9/2012	Kisii	Female	Kisii	Yes	2-4 weeks	Yes	2		1	No			Fever	2	53	39.6	86	Malaria		1040					Highland Epidemic	22	Above 15 years	Mutant	Wild type	wild type/Mutant	2012-05-09	2012	2	1	1	2-2012	Fever	6.94698	2. Highland Epidemic	CRT76	3. Above 15 years
KCH1111157	Kericho DH	11/21/2011	Kericho	Male	Kericho	Yes	2-4 weeks	No				No			Fever	2	12	40.3	101	Malaria		10200					Highland Epidemic	2	0 - 5 years	Wild type	wild type/Mutant	Wild type	2011-11-21	2011	4	0	0	4-2011	Fever	9.23014	2. Highland Epidemic		1. 0 - 5 years
KSI1311433	Kisii DH	11/6/2013	KISII	Male	Kisii	No		Yes		1	2	No			Headache	2	14.5	36.2	78	Malaria		4800					Highland Epidemic	3	0 - 5 years	Wild type	Wild type	Mutant	2013-11-06	2013	4	1	0	4-2013	Headache	8.47637	2. Highland Epidemic	MDR184	1. 0 - 5 years
KSI1404534	Kisii DH	4/28/2014	KISII	Male	Kisii	No		Yes		2	2	Yes	Quinine	Hospital/Dispensary	Fever	2	21	37	74	Malaria		8720					Highland Epidemic	5	0 - 5 years	Wild type	Wild type	wild type/Mutant	2014-04-28	2014	2	0	0	2-2014	Fever	9.07337	2. Highland Epidemic		1. 0 - 5 years
KSI1404533	Kisii DH	4/24/2014	KISII	Female	Kisii	No		Yes	3		1	No			Fever	3	53	38.9	78	Malaria		7320					Highland Epidemic	16	Above 15 years	Wild type	Wild type	Wild type	2014-04-24	2014	2	0	0	2-2014	Fever	8.89837	2. Highland Epidemic		3. Above 15 years
KSI1310415	Kisii DH	10/2/2013	KISII	Female	Kisii	No		Yes	2		1	No			Fever	2	14	39.2	88	Malaria		11920					Highland Epidemic	3	0 - 5 years	Wild type	Wild type	Wild type	2013-10-02	2013	4	0	0	4-2013	Fever	9.38597	2. Highland Epidemic		1. 0 - 5 years
KSI1407620	Kisii DH	7/23/2014	KISII	Male	Kisii	No		Yes	2		1	No			Fever	2	40	39.5	80	Malaria		15480					Highland Epidemic	12	6 - 15 years	Wild type	Wild type	Wild type	2014-07-23	2014	3	0	0	3-2014	Fever	9.6473	2. Highland Epidemic		2. 6 - 15 years
KSI1401460	Kisii DH	1/16/2014	KISII	Male	Kisii	No		Yes	3		1	No			Headache	2	77	38.2	74	Malaria		2720					Highland Epidemic	40	Above 15 years	Wild type	Wild type	Wild type	2014-01-16	2014	1	0	0	1-2014	Headache	7.90839	2. Highland Epidemic		3. Above 15 years
KSI1404526	Kisii DH	4/3/2014	KISII	Female	Kisii	No		Yes	2		1	No			Fever	3	60	38.8	74	Malaria		103500					Highland Epidemic	26	Above 15 years	Wild type	Wild type	Wild type	2014-04-03	2014	2	0	0	2-2014	Fever	11.5473	2. Highland Epidemic		3. Above 15 years
KSI0807002	Kisii DH	7/11/2008	KISII	Female	Kisii	Yes	1-2 months	Yes		1	1	Yes	Other	Hospital/Dispensary	Fever	1	11	39.8	102	Malaria							Highland Epidemic	4	0 - 5 years	Mutant	Mutant	Wild type	2008-07-11	2008	3	1	1	3-2008	Fever		2. Highland Epidemic	MDR86	1. 0 - 5 years
KSI1403502	Kisii DH	3/5/2014	KISII	Male	Kisii	No		Yes	2		1	No			Fever	2	19	39.9	80	Malaria		130500					Highland Epidemic	7	6 - 15 years	Wild type	Wild type	Wild type	2014-03-05	2014	1	0	0	1-2014	Fever	11.7791	2. Highland Epidemic		2. 6 - 15 years
KCH0805011	Kericho DH	5/19/2008	Kericho	Male	Kericho	Yes	1-2 months	No				No			Fever	1	23	39.8	88	Clinical Malaria		1080					Highland Epidemic	5	0 - 5 years	wild type/Mutant	Wild type	Wild type	2008-05-19	2008	2	0	0	2-2008	Fever	6.98472	2. Highland Epidemic		1. 0 - 5 years
KSI1401468	Kisii DH	1/23/2014	KISII	Male	Kisii	No		Yes		6	2	No			Fever	2	11.5	38.2	80	Malaria		5040					Highland Epidemic	3	0 - 5 years	Wild type	Wild type	Wild type	2014-01-23	2014	1	0	0	1-2014	Fever	8.52516	2. Highland Epidemic		1. 0 - 5 years
KSI1312446	Kisii DH	12/1/2013	KISII	Female	Kisii	No		No				No			Fever	2	12.5	39.1	76	Malaria		5440					Highland Epidemic	2	0 - 5 years	Wild type	Wild type	Wild type	2013-12-01	2013	4	0	0	4-2013	Fever	8.60153	2. Highland Epidemic		1. 0 - 5 years
KSI1205266	Kisii DH	5/10/2012	Kisii	Male	Kisii	No		No				No			Fever	2	45	39.5	74	Malaria		480					Highland Epidemic	13	6 - 15 years	Wild type	Wild type	Mutant	2012-05-10	2012	2	1	0	2-2012	Fever	6.17379	2. Highland Epidemic	MDR184	2. 6 - 15 years
KSI1404531	Kisii DH	4/16/2014	KISII	Female	Kisii	No		No				No			Fever	2	88	37.8	76	Malaria		7400					Highland Epidemic	27	Above 15 years	Wild type	Wild type	Mutant	2014-04-16	2014	2	1	0	2-2014	Fever	8.90924	2. Highland Epidemic	MDR184	3. Above 15 years
KSI1405547	Kisii DH	5/12/2014	KISII	Female	Kisii	Yes	<2weeks	Yes		8	2	No			Fever	2	13	39.9	80	Malaria		15560					Highland Epidemic	7	6 - 15 years	Wild type	Wild type	Mutant	2014-05-12	2014	2	1	0	2-2014	Fever	9.65246	2. Highland Epidemic	MDR184	2. 6 - 15 years
KCH1405259	Kericho DH	5/28/2014	Kericho	Female	Kericho	Yes	1-2 months	No				No			Headache	4	64	37.1	90	Malaria		520					Highland Epidemic	18	Above 15 years	Wild type	Wild type	Wild type	2014-05-28	2014	2	0	0	2-2014	Headache	6.25383	2. Highland Epidemic		3. Above 15 years
KSI1406586	Kisii DH	6/9/2014	KISII	Female	Kisii	No		Yes	2		1	No			Fever	2	19	38.1	72	Malaria		6720					Highland Epidemic	5	0 - 5 years	Wild type	Wild type	Wild type	2014-06-09	2014	2	0	0	2-2014	Fever	8.81284	2. Highland Epidemic		1. 0 - 5 years
KSI1403509	Kisii DH	3/12/2014	KISII	Male	Kisii	No		Yes	1		1	No			Fever	2	16	38.5	70	Malaria		315000					Highland Epidemic	4	0 - 5 years	Wild type	Wild type	Wild type	2014-03-12	2014	1	0	0	1-2014	Fever	12.6603	2. Highland Epidemic		1. 0 - 5 years
KCH1001079	Kericho DH	1/18/2010	Kericho	Male	Kericho	Yes	<2weeks	No				No			Fever	2	22	37.3	90	Malaria		1520					Highland Epidemic	5	0 - 5 years	wild type/Mutant	Wild type	wild type/Mutant	2010-01-18	2010	1	0	0	1-2010	Fever	7.32647	2. Highland Epidemic		1. 0 - 5 years
KCH1401235	Kericho DH	1/13/2014	Kericho	Male	Kericho	Yes	<2weeks	Yes			2	Yes	Other	Pharmacist	Fever	3	15	38.8	101	Malaria		1120					Highland Epidemic	4	0 - 5 years	Mutant	Wild type	Mutant	2014-01-13	2014	1	1	1	1-2014	Fever	7.02108	2. Highland Epidemic	MDR184	1. 0 - 5 years
KSI1403506	Kisii DH	3/12/2014	KISII	Male	Kisii	No		Yes		6	2	No			Fever	2	15	38.3	78	Malaria		213750					Highland Epidemic	2	0 - 5 years	Wild type	Wild type	Wild type	2014-03-12	2014	1	0	0	1-2014	Fever	12.2726	2. Highland Epidemic		1. 0 - 5 years
KSI1204253	Kisii DH	4/5/2012	Rachuonyo	Female	Homa Bay	No		Yes		4	2	No			Fever	3	18.5	38.8	88	Malaria		573750					Highland Epidemic	6	6 - 15 years	Mutant	Wild type	Mutant	2012-04-05	2012	2	1	1	2-2012	Fever	13.2599	2. Highland Epidemic	MDR184	2. 6 - 15 years
KCH1306211	Kericho DH	6/25/2013	Kericho	Male	Kericho	No		No				No			Headache	4	16	38.1	90	Malaria		103500					Highland Epidemic	6	6 - 15 years	Wild type	Wild type	Wild type	2013-06-25	2013	2	0	0	2-2013	Headache	11.5473	2. Highland Epidemic		2. 6 - 15 years
KCH1208181	Kericho DH	8/28/2012	Kericho	Female	Kericho	Yes	<2weeks	Yes	1		1	No			Headache	2	16	36.8	94	Malaria		5080					Highland Epidemic	4	0 - 5 years	undetermined	Wild type	wild type/Mutant	2012-08-28	2012	3	0	2	2-2013	Headache	8.53307	2. Highland Epidemic		1. 0 - 5 years
KSI1401451	Kisii DH	1/6/2014	KISII	Female	Kisii	No		No				No			Fever	1	40.1	38.1	79	Malaria		4320					Highland Epidemic	13	6 - 15 years	Wild type	Wild type	Mutant	2014-01-06	2014	1	1	0	1-2014	Fever	8.37101	2. Highland Epidemic	MDR184	2. 6 - 15 years
KSI1402495	Kisii DH	2/24/2014	KISII	Male	Kisii	No		Yes	2		1	No			Vomiting	3	20	36.1	74	Malaria		65250					Highland Epidemic	6	6 - 15 years	Wild type	Wild type	Wild type	2014-02-24	2014	1	0	0	1-2014	Others	11.086	2. Highland Epidemic		2. 6 - 15 years
KSI0804010	Kisii DH	4/16/2008	KISII CENTRAL	Female	Kisii	No		Yes			3	Yes	Fansidar	Hospital/Dispensary	Dizziness	2	24	37.9	110	Malaria		1400					Highland Epidemic	10	6 - 15 years	Mutant	wild type/Mutant	Wild type	2008-04-16	2008	2	1	1	2-2008	Others	7.24423	2. Highland Epidemic	CRT76	2. 6 - 15 years
KCH1207177	Kericho DH	7/31/2012	Kericho	Female	Kericho	Yes	<2weeks	Yes		6	2	No			Headache	3	28	39.6	101	Malaria		1160					Highland Epidemic	9	6 - 15 years	undetermined	Wild type	wild type/Mutant	2012-07-31	2012	3	0	2	2-2013	Headache	7.05618	2. Highland Epidemic		2. 6 - 15 years
KSI1405546	Kisii DH	5/7/2014	KISII	Female	Kisii	No		Yes		8	2	No			Fever	3	18	38.3	72	Malaria		5560					Highland Epidemic	4	0 - 5 years	wild type/Mutant	Wild type	wild type/Mutant	2014-05-07	2014	2	0	0	2-2014	Fever	8.62335	2. Highland Epidemic		1. 0 - 5 years
KSI1205261	Kisii DH	5/2/2012	Kisii	Female	Kisii	Yes	1-2 months	Yes		4	3	No			Headache	18	51	36.1	74	Malaria		7360					Highland Epidemic	16	Above 15 years	Wild type	Wild type	undetermined	2012-05-02	2012	2	0	0	2-2012	Headache	8.90382	2. Highland Epidemic		3. Above 15 years
KSI1402491	Kisii DH	2/18/2014	KISII	Male	Kisii	No		Yes		3		Yes	Other	Hospital/Dispensary	Fever	2	13	40	80	Malaria							Highland Epidemic	3	0 - 5 years	undetermined	Mutant	Wild type	2014-02-18	2014	1	1	2	1-2014	Fever		2. Highland Epidemic	MDR86	1. 0 - 5 years
KSI1404529	Kisii DH	4/3/2014	KISII	Female	Kisii	No		Yes	3		1	No			Fever	3	55	38.8	78	Malaria		625500					Highland Epidemic	70	Above 15 years	Wild type	Wild type	Wild type	2014-04-03	2014	2	0	0	2-2014	Fever	13.3463	2. Highland Epidemic		3. Above 15 years
KSI1204256	Kisii DH	4/12/2012	Kisii	Female	Kisii	No		Yes	1		1	No			Fever	2	17.5	38.5	78	Malaria		10880					Highland Epidemic	4	0 - 5 years	wild type/Mutant	Mutant	Wild type	2012-04-12	2012	2	1	0	2-2012	Fever	9.29468	2. Highland Epidemic	MDR86	1. 0 - 5 years
KCH0910071	Kericho DH	10/22/2009	Kericho	Male	Kericho	No		No				No			Diarrhea	3	10	37.2	102	Malaria		1280					Highland Epidemic	2	0 - 5 years	undetermined	Wild type	Wild type	2009-10-22	2009	4	0	2	4-2009	Others	7.15462	2. Highland Epidemic		1. 0 - 5 years
KSI1305346	Kisii DH	5/8/2013	Kisii	Male	Kisii	No		Yes	5		1	No			Fever	3	62	38.5	74	Malaria		15160					Highland Epidemic	23	Above 15 years	Mutant	Wild type	Mutant	2013-05-08	2013	2	1	1	2-2013	Fever	9.62642	2. Highland Epidemic	MDR184	3. Above 15 years
KSI1304331	Kisii DH	4/23/2013	Kisii	Female	Kisii	No		Yes	2		0	No			Fever	2	48	37.2	68	Malaria		14200					Highland Epidemic	13	6 - 15 years	Wild type	Wild type	Wild type	2013-04-23	2013	2	0	0	2-2013	Fever	9.561	2. Highland Epidemic		2. 6 - 15 years
KSI1405570	Kisii DH	5/26/2014	KISII	Female	Kisii	No		Yes	2		1	No			Fever	2	17.5	38.1	72	Malaria		8360					Highland Epidemic	10	6 - 15 years	Wild type	Wild type	Mutant	2014-05-26	2014	2	1	0	2-2014	Fever	9.03121	2. Highland Epidemic	MDR184	2. 6 - 15 years
KSI1405561	Kisii DH	5/20/2014	KISII	Female	Kisii	Yes	2-4 weeks	Yes	2		1	No			Fever	2	20	39.4	74	Malaria		171000					Highland Epidemic	5	0 - 5 years	Wild type	Wild type	Wild type	2014-05-20	2014	2	0	0	2-2014	Fever	12.0494	2. Highland Epidemic		1. 0 - 5 years
KSI1311432	Kisii DH	11/4/2013	KISII	Male	Kisii	No		Yes		6	2	No			Fever	2	12	38.2	84	Malaria							Highland Epidemic	3	0 - 5 years	wild type/Mutant	wild type/Mutant	wild type/Mutant	2013-11-04	2013	4	0	0	4-2013	Fever		2. Highland Epidemic		1. 0 - 5 years
KSI1310426	Kisii DH	10/23/2013	KISII	Female	Kisii	No		No				No			Fever	3	10	38.6	78			1040					Highland Epidemic	1	0 - 5 years	Wild type	Wild type	Mutant	2013-10-23	2013	4	1	0	4-2013	Fever	6.94698	2. Highland Epidemic	MDR184	1. 0 - 5 years
KSI1402485	Kisii DH	2/12/2014	KISII	Female	Kisii	No		Yes	2		1	No			Fever	3	23	39.1	78	Malaria		13080					Highland Epidemic	7	6 - 15 years	Wild type	Wild type	wild type/Mutant	2014-02-12	2014	1	0	0	1-2014	Fever	9.47884	2. Highland Epidemic		2. 6 - 15 years
KCH1308219	Kericho DH	8/14/2014	Kisii	Female	Kisii	Yes	2-4 weeks	Yes	1		1	No			Headache	4	55	36.6	98	Malaria	RTI	2720					Highland Epidemic	19	Above 15 years	Wild type	Wild type	Mutant	2014-08-14	2014	3	1	0	3-2014	Headache	7.90839	2. Highland Epidemic	MDR184	3. Above 15 years
KSI1406585	Kisii DH	6/9/2014	KISII	Male	Kisii	No		Yes	1		1	No			Fever	2	13.5	36.2	70	Malaria		3560					Highland Epidemic	3	0 - 5 years	Wild type	Wild type	Wild type	2014-06-09	2014	2	0	0	2-2014	Fever	8.17752	2. Highland Epidemic		1. 0 - 5 years
KCH1305209	Kericho DH	5/30/2013	Kipkelion	Female	Kericho	No		Yes		2	4	No			Headache	3	22	37.2	100	Malaria		231750					Highland Epidemic	6	6 - 15 years	Wild type	Wild type	Wild type	2013-05-30	2013	2	0	0	2-2013	Headache	12.3534	2. Highland Epidemic		2. 6 - 15 years
KSI1401464	Kisii DH	1/20/2014	KISII	Female	Kisii	Yes	2-4 weeks	Yes		5	0	No			Fever	2	21.5	39.2	80	Malaria		312750					Highland Epidemic	6	6 - 15 years	Wild type	Wild type	Mutant	2014-01-20	2014	1	1	0	1-2014	Fever	12.6532	2. Highland Epidemic	MDR184	2. 6 - 15 years
KSI1111213	Kisii DH	11/8/2011	Kisii	Male	Kisii	No		Yes		6	2	No			Fever	2	11	38.1	84	Malaria		320					Highland Epidemic	3	0 - 5 years	Wild type	Wild type	Wild type	2011-11-08	2011	4	0	0	4-2011	Fever	5.76832	2. Highland Epidemic		1. 0 - 5 years
KSI1306364	Kisii DH	6/24/2013	Kisii	Male	Kisii	No		Yes	1		1	No			Fever	2	19.5	38.6	102	Malaria		141750					Highland Epidemic	6	6 - 15 years	Wild type	Wild type	Wild type	2013-06-24	2013	2	0	0	2-2013	Fever	11.8618	2. Highland Epidemic		2. 6 - 15 years
KCH1003098	Kericho DH	3/24/2010	Kericho	Female	Kericho	Yes	2-4 weeks	Yes		1		Yes	Other	Hospital/Dispensary	Joint Pains	5	48	37.6	96	Malaria		5680					Highland Epidemic	32	Above 15 years	undetermined	Wild type	undetermined	2010-03-24	2010	1	0	2	1-2010	Joint Pains	8.64471	2. Highland Epidemic		3. Above 15 years
KCH0808034	Kericho DH	8/27/2008	Kericho	Female	Kericho	Yes	2-4 weeks	No				No			Seizure	2	11	38.4	92	Clinical Malaria		12760					Highland Epidemic	2	0 - 5 years	wild type/Mutant	Wild type	Wild type	2008-08-27	2008	3	0	0	3-2008	Others	9.45407	2. Highland Epidemic		1. 0 - 5 years
KSI1401459	Kisii DH	1/16/2014	KISII	Male	Kisii	No		Yes		6	2	No			Fever	2	13	39.5	78	Malaria		162000					Highland Epidemic	3	0 - 5 years	Wild type	Wild type	Mutant	2014-01-16	2014	1	1	0	1-2014	Fever	11.9954	2. Highland Epidemic	MDR184	1. 0 - 5 years
KCH0804012	Kericho DH	4/29/2008	Kericho	Female	Kericho	Yes	<2weeks	No				No			Fever	7	11	39.4	98	Clinical Malaria							Highland Epidemic	2	0 - 5 years	wild type/Mutant	undetermined	undetermined	2008-04-29	2008	2	0	0	2-2008	Fever		2. Highland Epidemic		1. 0 - 5 years
KCH0805003	Kericho DH	5/6/2008	Kericho	Male	Kericho	Yes	<2weeks	No				No			Fever	2	9.2	38.8	98	Malaria		520					Highland Epidemic	1	0 - 5 years	Mutant	Wild type	Wild type	2008-05-06	2008	2	1	1	2-2008	Fever	6.25383	2. Highland Epidemic	CRT76	1. 0 - 5 years
KCH0805005	Kericho DH	5/8/2008	Kericho	Male	Kericho	Yes	<2weeks	Yes	1		2	No			Other	1	14	36	92	Clinical Malaria		1880					Highland Epidemic	2	0 - 5 years	wild type/Mutant	Mutant	Wild type	2008-05-08	2008	2	1	0	2-2008	Others	7.53903	2. Highland Epidemic	MDR86	1. 0 - 5 years
KCH1004101	Kericho DH	4/14/2010	Kericho	Male	Kericho	No		Yes		1	4	Yes	Other	Hospital/Dispensary	Joint Pains	3	25	38.5	88	Malaria		5560					Highland Epidemic	10	6 - 15 years	Mutant	Mutant	undetermined	2010-04-14	2010	2	1	1	2-2010	Joint Pains	8.62335	2. Highland Epidemic	MDR86	2. 6 - 15 years
KSI1311441	Kisii DH	11/20/2013	KISII	Male	Kisii	No		Yes		2	2	Yes		Hospital/Dispensary	Fever	3	7.5	38.1	84	Malaria		87750					Highland Epidemic	7	6 - 15 years	Wild type	Wild type	Mutant	2013-11-20	2013	4	1	0	4-2013	Fever	11.3822	2. Highland Epidemic	MDR184	2. 6 - 15 years
KSI1208285	Kisii DH	8/28/2012	Kisii	Female	Kisii	Yes	<2weeks	Yes	3		1	No			Fever	2	50	38.6	88	Malaria		5960					Highland Epidemic	18	Above 15 years	wild type/Mutant	Wild type	Wild type	2012-08-28	2012	3	0	0	2-2013	Fever	8.69283	2. Highland Epidemic		3. Above 15 years
KSI1309403	Kisii DH	9/4/2013	KISII	Female	Kisii	Yes	2-4 weeks	Yes	3	0	1	No			Fever	2	59	39.5	88	Malaria		14400					Highland Epidemic	24	Above 15 years	Wild type	Wild type	Mutant	2013-09-04	2013	3	1	0	3-2013	Fever	9.57498	2. Highland Epidemic	MDR184	3. Above 15 years
KCH1307212	Kericho DH	7/2/2013	Kericho	Female	Kericho	Yes	<2weeks	No				No			Headache	3	51	37.6	98	Malaria		21000					Highland Epidemic	18	Above 15 years	Wild type	Wild type	Mutant	2013-07-02	2013	3	1	0	3-2013	Headache	9.95228	2. Highland Epidemic	MDR184	3. Above 15 years
KSI1405571	Kisii DH	5/27/2014	KISII	Male	Kisii	No		Yes		6	2	No			Fever	2	16	39.3	74	Malaria		270000					Highland Epidemic	4	0 - 5 years	wild type/Mutant	Wild type	Mutant	2014-05-27	2014	2	1	0	2-2014	Fever	12.5062	2. Highland Epidemic	MDR184	1. 0 - 5 years
KSI1201231	Kisii DH	1/19/2012	Kisii	Male	Kisii	Yes	<2weeks	No				No				2	68	37.8	74	Malaria		960					Highland Epidemic	21	Above 15 years	wild type/Mutant	Wild type	wild type/Mutant	2012-01-19	2012	1	0	0	1-2012		6.86693	2. Highland Epidemic		3. Above 15 years
KSI1401455	Kisii DH	1/13/2014	KISII	Female	Kisii	No		Yes		2	3	Yes	Other	Hospital/Dispensary	Vomiting	3	36	36.7	78	Malaria		7360					Highland Epidemic	12	6 - 15 years	Wild type	Wild type	Wild type	2014-01-13	2014	1	0	0	1-2014	Others	8.90382	2. Highland Epidemic		2. 6 - 15 years
KCH0808033	Kericho DH	8/25/2008	Kericho	Male	Kericho	Yes	2-4 weeks	Yes		4	2	No			Fever	10	15	39	90	Malaria		87750					Highland Epidemic	4	0 - 5 years	wild type/Mutant	wild type/Mutant	wild type/Mutant	2008-08-25	2008	3	0	0	3-2008	Fever	11.3822	2. Highland Epidemic		1. 0 - 5 years
KSI1402486	Kisii DH	2/12/2014	KISII	Male	Kisii	No		Yes		8	6	No			Fever	2	17	38.5	78	Malaria		1760					Highland Epidemic	4	0 - 5 years	Wild type	Wild type	wild type/Mutant	2014-02-12	2014	1	0	0	1-2014	Fever	7.47307	2. Highland Epidemic		1. 0 - 5 years
KCH0804003	Kericho DH	4/7/2008	Kericho	Male	Kericho	No		No				No			Headache	4	29	36.8	89	Malaria	URTI	7160					Highland Epidemic	9	6 - 15 years	Mutant	Mutant	Wild type	2008-04-07	2008	2	1	1	2-2008	Headache	8.87627	2. Highland Epidemic	MDR86	2. 6 - 15 years
KCH0809036	Kericho DH	9/2/2008	Kericho	Male	Kericho	Yes	2-4 weeks	No				No			Fever	4	12	38.2	90	Malaria		280					Highland Epidemic	2	0 - 5 years	undetermined	undetermined	Wild type	2008-09-02	2008	3	0	2	3-2008	Fever	5.63479	2. Highland Epidemic		1. 0 - 5 years
KCH1001081	Kericho DH	1/18/2010	Kericho	Male	Kericho	Yes	2-4 weeks	Yes		5	1	Yes	Other		Headache	6	35	38.8	87	Malaria		14000					Highland Epidemic	12	6 - 15 years	wild type/Mutant	wild type/Mutant	Wild type	2010-01-18	2010	1	0	0	1-2010	Headache	9.54681	2. Highland Epidemic		2. 6 - 15 years
KSI1206267	Kisii DH	6/27/2012	Kisii	Female	Kisii	No		Yes	1		1	No			Fever	2	17.5	39.5	78	Malaria							Highland Epidemic	4	0 - 5 years	undetermined	undetermined	Wild type	2012-06-27	2012	2	0	2	2-2012	Fever		2. Highland Epidemic		1. 0 - 5 years
KSI1311436	Kisii DH	11/12/2013	KISII	Male	Kisii	No		No				No			Fever	1	29	38.1	74	Malaria							Highland Epidemic	10	6 - 15 years	wild type/Mutant	Wild type	wild type/Mutant	2013-11-12	2013	4	0	0	4-2013	Fever		2. Highland Epidemic		2. 6 - 15 years
KCH0812049	Kericho DH	12/4/2008	Kericho	Female	Kericho	Yes	<2weeks	Yes		4		No			Seizure												Highland Epidemic	8	6 - 15 years	wild type/Mutant	Wild type	wild type/Mutant	2008-12-04	2008	4	0	0	4-2008	Others		2. Highland Epidemic		2. 6 - 15 years
KCH1102138	Kericho DH	2/14/2011	Kericho	Female	Kericho	Yes	2-4 weeks	No				No			Headache	3	62	38	98	Malaria		1920					Highland Epidemic	25	Above 15 years	undetermined	wild type/Mutant	Mutant	2011-02-14	2011	1	1	2	1-2011	Headache	7.56008	2. Highland Epidemic	MDR184	3. Above 15 years
KCH1304202	Kericho DH	4/16/2013	Kericho	Female	Kericho	Yes	2-4 weeks	No				No			Headache	3	20	38	101	Malaria		69750					Highland Epidemic	6	6 - 15 years	Mutant	Wild type	Mutant	2013-04-16	2013	2	1	1	2-2013	Headache	11.1527	2. Highland Epidemic	MDR184	2. 6 - 15 years
KCH1107149	Kericho DH	7/20/2011	Kericho	Male	Kericho	Yes	<2weeks	Yes	1		1	No			Fever	2	17	39.2	90	Malaria		1520					Highland Epidemic	5	0 - 5 years	wild type/Mutant	Wild type	Mutant	2011-07-20	2011	3	1	0	3-2011	Fever	7.32647	2. Highland Epidemic	MDR184	1. 0 - 5 years
KSI1401456	Kisii DH	1/14/2014	KISII	Male	Kisii	No		Yes		8	2	No			Fever	2	16.5	37.8	84	Malaria		4360					Highland Epidemic	5	0 - 5 years	Wild type	Wild type	Wild type	2014-01-14	2014	1	0	0	1-2014	Fever	8.38023	2. Highland Epidemic		1. 0 - 5 years
KCH1009129	Kericho DH	9/13/2010	Kericho	Female	Kericho	Yes	<2weeks	No				No			Seizure	1	16	40	90	Malaria		880					Highland Epidemic	5	0 - 5 years	Mutant	Wild type	Mutant	2010-09-13	2010	3	1	1	3-2010	Others	6.77992	2. Highland Epidemic	MDR184	1. 0 - 5 years
KSI0804011	Kisii DH	4/28/2008	KISI	Female	Kisii	Yes	<2weeks	Yes		9	1	No			Fever	1	19.5	39	110	Malaria		11920					Highland Epidemic	5	0 - 5 years	Mutant	wild type/Mutant	wild type/Mutant	2008-04-28	2008	2	1	1	2-2008	Fever	9.38597	2. Highland Epidemic	CRT76	1. 0 - 5 years
KSI1405543	Kisii DH	5/6/2014	KISII	Female	Kisii	No		Yes	2		1	No			Fever	2	29	39	70	Malaria		13040					Highland Epidemic	6	6 - 15 years	Wild type	Wild type	wild type/Mutant	2014-05-06	2014	2	0	0	2-2014	Fever	9.47578	2. Highland Epidemic		2. 6 - 15 years
KCH0910068	Kericho DH	10/14/2009	Kericho	Female	Kericho	No		No				No			Fever	2	11	40	102	Malaria		4200					Highland Epidemic	5	0 - 5 years	wild type/Mutant	Wild type	Wild type	2009-10-14	2009	4	0	0	4-2009	Fever	8.34284	2. Highland Epidemic		1. 0 - 5 years
KSI0806003	Kisii DH	6/27/2008	KISII	Female	Kisii	No		Yes	3			No			Headache	5	65	38.3	90	Malaria							Highland Epidemic	18	Above 15 years	Mutant	Mutant	Wild type	2008-06-27	2008	2	1	1	2-2008	Headache		2. Highland Epidemic	MDR86	3. Above 15 years
KCH1309226	Kericho DH	9/19/2013	Kericho	Female	Kericho																						Highland Epidemic	7	6 - 15 years	Wild type	Wild type	Wild type	2013-09-19	2013	3	0	0	3-2013			2. Highland Epidemic		2. 6 - 15 years
KSI0805001	Kisii DH	5/16/2008	KISII	Female	Kisii	No		Yes		9	1	No			Fever	3	64	39.2	98	Malaria		840					Highland Epidemic	38	Above 15 years	Mutant	Mutant	Wild type	2008-05-16	2008	2	1	1	2-2008	Fever	6.7334	2. Highland Epidemic	MDR86	3. Above 15 years
KSI1402483	Kisii DH	2/12/2014	KISII	Male	Kisii	No		Yes	1		1	No			Fever	2	30	39.1	74	Malaria		200250					Highland Epidemic	10	6 - 15 years	Mutant	Wild type	Mutant	2014-02-12	2014	1	1	1	1-2014	Fever	12.2073	2. Highland Epidemic	MDR184	2. 6 - 15 years
KCH1001078	Kericho DH	1/15/2010	Kericho	Male	Kericho	Yes	<2weeks	Yes		6	1	No			Headache	5	17.5	39.8	110	Malaria		5800					Highland Epidemic	5	0 - 5 years	wild type/Mutant	Wild type	wild type/Mutant	2010-01-15	2010	1	0	0	1-2010	Headache	8.66561	2. Highland Epidemic		1. 0 - 5 years
KSI1402492	Kisii DH	2/19/2014	KISII	Male	Kisii	No		Yes		6		Yes	Other	Hospital/Dispensary	Fever	2	15.5	40.2	72	Malaria		128250					Highland Epidemic	3	0 - 5 years	Wild type	Wild type	Mutant	2014-02-19	2014	1	1	0	1-2014	Fever	11.7617	2. Highland Epidemic	MDR184	1. 0 - 5 years
KSI0808005	Kisii DH	8/20/2008	KISII	Female	Kisii	Yes	2-4 weeks	No				No			Fever	2	18	38.7	104	Malaria		3840					Highland Epidemic	4	0 - 5 years	Mutant	Wild type	wild type/Mutant	2008-08-20	2008	3	1	1	3-2008	Fever	8.25323	2. Highland Epidemic	CRT76	1. 0 - 5 years
KCH1205169	Kericho DH	5/14/2012	Kericho	Male	Kericho	Yes	2-4 weeks	No				No			Fever	6	14	39.4	100	Malaria	Anaemia	2360					Highland Epidemic	3	0 - 5 years	Mutant	Wild type	Mutant	2012-05-14	2012	2	1	1	2-2012	Fever	7.76642	2. Highland Epidemic	MDR184	1. 0 - 5 years
KCH1001084	Kericho DH	1/28/2010	Kericho	Female	Kericho	Yes	2-4 weeks	Yes		8	3	No			Headache	2	46	36.3	80	Malaria		3000					Highland Epidemic	27	Above 15 years	wild type/Mutant	Mutant	Wild type	2010-01-28	2010	1	1	0	1-2010	Headache	8.00637	2. Highland Epidemic	MDR86	3. Above 15 years
KCH1001077	Kericho DH	1/12/2010	Kericho	Male	Kericho	Yes	<2weeks	Yes		4	1	No			Fever	2	10	38.8	105	Malaria		7400					Highland Epidemic	1	0 - 5 years	undetermined	Mutant	undetermined	2010-01-12	2010	1	1	2	1-2010	Fever	8.90924	2. Highland Epidemic	MDR86	1. 0 - 5 years
KCH1003089	Kericho DH	3/1/2010	Kericho	Male	Kericho	No		No				No			Headache	14	18	36.9	90	Malaria		69750					Highland Epidemic	5	0 - 5 years	undetermined	Wild type	Wild type	2010-03-01	2010	1	0	2	1-2010	Headache	11.1527	2. Highland Epidemic		1. 0 - 5 years
KSI0804007	Kisii DH	4/10/2008	KISII	Male	Kisii	Yes	2-4 weeks	Yes	1		1	No			Fever	2	18	38.6	110	Malaria	RTI	15160					Highland Epidemic	5	0 - 5 years	Mutant	wild type/Mutant	wild type/Mutant	2008-04-10	2008	2	1	1	2-2008	Fever	9.62642	2. Highland Epidemic	CRT76	1. 0 - 5 years
KCH1003092	Kericho DH	3/9/2010	Kericho	Female	Kericho	Yes	2-4 weeks	Yes		3	4	No			Fever	3	11	40.1	103	Malaria		960					Highland Epidemic	3	0 - 5 years	Mutant	Wild type	Wild type	2010-03-09	2010	1	1	1	1-2010	Fever	6.86693	2. Highland Epidemic	CRT76	1. 0 - 5 years
KCH1003093	Kericho DH	3/10/2010	Kericho	Female	Kericho	Yes	2-4 weeks	No				No			Fever	1	15	40	96	Malaria							Highland Epidemic	4	0 - 5 years	Mutant	Wild type	Mutant	2010-03-10	2010	1	1	1	1-2010	Fever		2. Highland Epidemic	MDR184	1. 0 - 5 years
KSI1205264	Kisii DH	5/8/2012	Kisii	Female	Kisii	Yes	2-4 weeks	Yes		8	2	No			Fever	5	15.5	39.1	88	Malaria		9920					Highland Epidemic	5	0 - 5 years	Mutant	Wild type	Wild type	2012-05-08	2012	2	1	1	2-2012	Fever	9.20231	2. Highland Epidemic	CRT76	1. 0 - 5 years
KCH1003095	Kericho DH	3/17/2010	Kericho	Male	Kericho	Yes	<2weeks	No				No			Fever	3	15	39.6	101	Malaria		480					Highland Epidemic	3	0 - 5 years	wild type/Mutant	Mutant	Wild type	2010-03-17	2010	1	1	0	1-2010	Fever	6.17379	2. Highland Epidemic	MDR86	1. 0 - 5 years
KCH1003096	Kericho DH	3/19/2010	Kericho	Female	Kericho	Yes	1-2 months	Yes		4	1	No			Headache	1	24	38	90	Malaria							Highland Epidemic	6	6 - 15 years	Wild type	Wild type	undetermined	2010-03-19	2010	1	0	0	1-2010	Headache		2. Highland Epidemic		2. 6 - 15 years
KSI1405563	Kisii DH	5/21/2014	KISII	Male	Kisii	No		Yes		6	2	No			Fever	2	11	38.2	74	Malaria		166500					Highland Epidemic	2	0 - 5 years	Wild type	Wild type	Wild type	2014-05-21	2014	2	0	0	2-2014	Fever	12.0228	2. Highland Epidemic		1. 0 - 5 years
KCH0907065	Kericho DH	7/14/2009	Kericho	Male	Kericho	Yes	2-4 weeks	No				No			Diarrhea	5	10	36.7	98	Malaria		400					Highland Epidemic	3	0 - 5 years	wild type/Mutant	Wild type	undetermined	2009-07-14	2009	3	0	0	3-2009	Others	5.99146	2. Highland Epidemic		1. 0 - 5 years
KSI1405549	Kisii DH	5/12/2014	KISII	Female	Kisii	No		Yes		5	2	No			Fever	2	12.5	39.9	72	Malaria		1040					Highland Epidemic	2	0 - 5 years	Wild type	Wild type	Wild type	2014-05-12	2014	2	0	0	2-2014	Fever	6.94698	2. Highland Epidemic		1. 0 - 5 years
KCH1005109	Kericho DH	5/6/2010	Kericho	Female	Kericho	Yes	<2weeks	No				No			Headache	4	15	38.1	88	Malaria		1560					Highland Epidemic	4	0 - 5 years	Mutant	Wild type	Wild type	2010-05-06	2010	2	1	1	2-2010	Headache	7.35244	2. Highland Epidemic	CRT76	1. 0 - 5 years
KCH0808031	Kericho DH	8/20/2008	Kericho	Male	Kericho	Yes	2-4 weeks	No				No			Fever	3	11	38.1	90	Clinical Malaria		56250					Highland Epidemic	2	0 - 5 years	Mutant	Mutant	Wild type	2008-08-20	2008	3	1	1	3-2008	Fever	10.9376	2. Highland Epidemic	MDR86	1. 0 - 5 years
KCH1402240	Kericho DH	3/26/2014	Kericho	Male	Kericho	Yes	2-4 weeks	Yes	1		1	No			Headache	7	52	36.5	88	Malaria		1320					Highland Epidemic	35	Above 15 years	Wild type	Wild type	Mutant	2014-03-26	2014	1	1	0	1-2014	Headache	7.18539	2. Highland Epidemic	MDR184	3. Above 15 years
KSI1403505	Kisii DH	3/11/2014	KISII	Male	Kisii	Yes	<2weeks	No				No			Fever	2	8.3	38.5	78			13320					Highland Epidemic	0	0 - 5 years	Wild type	Wild type	Wild type	2014-03-11	2014	1	0	0	1-2014	Fever	9.49702	2. Highland Epidemic		1. 0 - 5 years
KCH1006118	Kericho DH	6/7/2010	Kericho	Female	Kericho	Yes	2-4 weeks	Yes	5			No			Headache	1	66	39.8	82	Malaria		2080					Highland Epidemic	29	Above 15 years	Mutant	Mutant	Wild type	2010-06-07	2010	2	1	1	2-2010	Headache	7.64012	2. Highland Epidemic	MDR86	3. Above 15 years
KCH1006119	Kericho DH	6/9/2010	Kericho	Male	Kericho	Yes	<2weeks	No				No			Headache	4	58	38.2	82	Malaria		2680					Highland Epidemic	21	Above 15 years	Mutant	Mutant	Wild type	2010-06-09	2010	2	1	1	2-2010	Headache	7.89357	2. Highland Epidemic	MDR86	3. Above 15 years
KCH1005116	Kericho DH	5/26/2010	Kericho	Male	Kericho	Yes	2-4 weeks	No				No			Headache	2	26	39.1	82	Malaria		4320					Highland Epidemic	10	6 - 15 years	wild type/Mutant	Wild type	Wild type	2010-05-26	2010	2	0	0	2-2010	Headache	8.37101	2. Highland Epidemic		2. 6 - 15 years
KCH1006122	Kericho DH	6/14/2010	Kericho	Male	Kericho	No		No				No			Headache	3	49	36.2	82	Malaria		6360					Highland Epidemic	16	Above 15 years	Mutant	Wild type	undetermined	2010-06-14	2010	2	1	1	2-2010	Headache	8.75778	2. Highland Epidemic	CRT76	3. Above 15 years
KSI1304335	Kisii DH	4/23/2013	Kisii	Male	Kisii	No		Yes	2		1	No			Headache	3	43	38.8	72	Malaria		10600					Highland Epidemic	6	6 - 15 years	Wild type	Wild type	Wild type	2013-04-23	2013	2	0	0	2-2013	Headache	9.26861	2. Highland Epidemic		2. 6 - 15 years
KSI0804002	Kisii DH	4/3/2008	KISII	Female	Kisii	No		Yes		2	2	Yes	Fansidar	Self	Dizziness	4	46	37	76	Malaria		720					Highland Epidemic	40	Above 15 years	wild type/Mutant	Mutant	Wild type	2008-04-03	2008	2	1	0	2-2008	Others	6.57925	2. Highland Epidemic	MDR86	3. Above 15 years
KCH1008127	Kericho DH	8/23/2010	Kericho	Female	Kericho	Yes	<2weeks	Yes		2	3	No			Fever	7	11		100	Malaria		175500					Highland Epidemic	1	0 - 5 years	Mutant	Mutant	Wild type	2010-08-23	2010	3	1	1	3-2010	Fever	12.0754	2. Highland Epidemic	MDR86	1. 0 - 5 years
KCH1404252	Kericho DH	4/23/2014	Kericho	Male	Kericho	No		No				No			Headache	3	70	37.2	69	Clinical Malaria		920					Highland Epidemic	50	Above 15 years	wild type/Mutant	Wild type	wild type/Mutant	2014-04-23	2014	2	0	0	2-2014	Headache	6.82437	2. Highland Epidemic		3. Above 15 years
KSI1304336	Kisii DH	4/24/2013	Kisii	Female	Kisii	No		No				No			Fever	3	13	38.2	80	Malaria		12400					Highland Epidemic	4	0 - 5 years	Wild type	Wild type	Wild type	2013-04-24	2013	2	0	0	2-2013	Fever	9.42545	2. Highland Epidemic		1. 0 - 5 years
KCH1009130	Kericho DH	9/20/2010	Kericho	Male	Kericho	Yes	<2weeks	Yes		3	2	No			Fever	2	19.5	38.5	96	Malaria		1000					Highland Epidemic	5	0 - 5 years	Mutant	Wild type	Wild type	2010-09-20	2010	3	1	1	3-2010	Fever	6.90776	2. Highland Epidemic	CRT76	1. 0 - 5 years
KCH1011134	Kericho DH	11/2/2010	Kericho	Female	Kericho	Yes	<2weeks	No				No				1	77	37.5	87	Malaria		42750					Highland Epidemic	31	Above 15 years	Mutant	Wild type	Mutant	2010-11-02	2010	4	1	1	4-2010		10.6631	2. Highland Epidemic	MDR184	3. Above 15 years
KSI1403507	Kisii DH	3/12/2014	KISII	Female	Kisii	No		Yes	1		1	No			Fever	3	18	39.7	74	Malaria		139500					Highland Epidemic	5	0 - 5 years	Wild type	Wild type	Wild type	2014-03-12	2014	1	0	0	1-2014	Fever	11.8458	2. Highland Epidemic		1. 0 - 5 years
KSI1301307	Kisii DH	1/8/2013	Kisii	Female	Kisii	Yes	<2weeks	Yes		5	2	No			Fever	2	18	40.5	78	Malaria		3800					Highland Epidemic	4	0 - 5 years	Mutant	Wild type	Mutant	2013-01-08	2013	1	1	1	2-2013	Fever	8.24276	2. Highland Epidemic	MDR184	1. 0 - 5 years
KCH1004107	Kericho DH	4/29/2010	Kericho	Female	Kericho	Yes	2-4 weeks	No				No			Headache	2	54	38.1	88	Malaria		1880					Highland Epidemic	25	Above 15 years	Mutant	Wild type	Mutant	2010-04-29	2010	2	1	1	2-2010	Headache	7.53903	2. Highland Epidemic	MDR184	3. Above 15 years
KCH0911073	Kericho DH	11/19/2009	Kericho	Female	Kericho	Yes	<2weeks	Yes	2		1	No			Headache	3	73	36.5	82	Malaria		16000					Highland Epidemic	29	Above 15 years	wild type/Mutant	Wild type	Mutant	2009-11-19	2009	4	1	0	4-2009	Headache	9.68034	2. Highland Epidemic	MDR184	3. Above 15 years
KCH0910069	Kericho DH	10/14/2009	Kericho	Male	Kericho	Yes	<2weeks	Yes		4	2	No			Fever	2	52	38.4	72	Malaria		12160					Highland Epidemic	30	Above 15 years	wild type/Mutant	Wild type	Wild type	2009-10-14	2009	4	0	0	4-2009	Fever	9.40591	2. Highland Epidemic		3. Above 15 years
KSI1404525	Kisii DH	4/1/2014	KISII	Female	Kisii	No		Yes		9	1	No			Fever	2	14.5	39.1	78	Malaria		74250					Highland Epidemic	5	0 - 5 years	Mutant	Wild type	Mutant	2014-04-01	2014	2	1	1	2-2014	Fever	11.2152	2. Highland Epidemic	MDR184	1. 0 - 5 years
KCH1204167	Kericho DH	4/12/2012	Kericho	Female	Kericho	No		No				No			Dizziness	4	57	38.9	90	Clinical Malaria		640					Highland Epidemic	19	Above 15 years	undetermined	undetermined	Mutant	2012-04-12	2012	2	1	2	2-2012	Others	6.46147	2. Highland Epidemic	MDR184	3. Above 15 years
KSI1304333	Kisii DH	4/23/2013	Kisii	Female	Kisii	No		Yes	1		1	No			Fever	2	36	39.5	80	Malaria		150750					Highland Epidemic	6	6 - 15 years	Wild type	Wild type	Wild type	2013-04-23	2013	2	0	0	2-2013	Fever	11.9234	2. Highland Epidemic		2. 6 - 15 years
KCH1306210	Kericho DH	6/24/2013	Kericho	Male	Kericho	Yes	<2weeks	No				No			Headache	3	50	38.2	88	Malaria		56250					Highland Epidemic	28	Above 15 years	Wild type	Wild type	Mutant	2013-06-24	2013	2	1	0	2-2013	Headache	10.9376	2. Highland Epidemic	MDR184	3. Above 15 years
KSI1202241	Kisii DH	2/28/2012	Kisii	Female	Kisii	No		Yes		4	2	No			Fever	4	10.5	39.9	74	Malaria	Gastroenteritis	1086750					Highland Epidemic	2	0 - 5 years	Mutant	Wild type	Wild type	2012-02-28	2012	1	1	1	1-2012	Fever	13.8987	2. Highland Epidemic	CRT76	1. 0 - 5 years
KCH1308222	Kericho DH	8/28/2013	Kericho	Male	Kericho	No		Yes		1	1	Yes	Other		Headache	8	28	37.6	98	Malaria		1520					Highland Epidemic	13	6 - 15 years	wild type/Mutant	wild type/Mutant	wild type/Mutant	2013-08-28	2013	3	0	0	3-2013	Headache	7.32647	2. Highland Epidemic		2. 6 - 15 years
KSI1403504	Kisii DH	3/11/2014	KISII	Female	Kisii	No		Yes		6	2	No			Fever	3	14	39	72	Malaria		200250					Highland Epidemic	5	0 - 5 years	Wild type	Wild type	Wild type	2014-03-11	2014	1	0	0	1-2014	Fever	12.2073	2. Highland Epidemic		1. 0 - 5 years
KCH1201158	Kericho DH	1/12/2012	Kericho	Female	Kericho	Yes	<2weeks	Yes	2		1	No			Headache	3	24	38.2	100	Malaria		7800					Highland Epidemic	6	6 - 15 years	Wild type	undetermined	Wild type	2012-01-12	2012	1	0	0	1-2012	Headache	8.96188	2. Highland Epidemic		2. 6 - 15 years
KSI1401466	Kisii DH	1/23/2014	KISII	Female	Kisii	No		Yes		4	2	No			Fever	2	11.5	38.9	74	Malaria		229500					Highland Epidemic	2	0 - 5 years	Wild type	Wild type	wild type/Mutant	2014-01-23	2014	1	0	0	1-2014	Fever	12.3437	2. Highland Epidemic		1. 0 - 5 years
KSI0806002	Kisii DH	6/12/2008	KISII	Male	Kisii	No		Yes		1	2	Yes	Amodiaquine	Hospital/Dispensary	Headache	1	52	38.6	86	Malaria		80					Highland Epidemic	18	Above 15 years	Mutant	wild type/Mutant	wild type/Mutant	2008-06-12	2008	2	1	1	2-2008	Headache	4.38203	2. Highland Epidemic	CRT76	3. Above 15 years
KCH1107151	Kericho DH	7/21/2011	Kericho	Female	Kericho	Yes	<2weeks	No				No			Diarrhea	5	64	37.5	80	Malaria		157500					Highland Epidemic	19	Above 15 years	wild type/Mutant	Wild type	undetermined	2011-07-21	2011	3	0	0	3-2011	Others	11.9672	2. Highland Epidemic		3. Above 15 years
KCH1101137	Kericho DH	1/20/2011	Kericho	Female	Kericho	No		No				No			Fever	2	12	40	96	Malaria		4600					Highland Epidemic	2	0 - 5 years	Mutant	Wild type	Mutant	2011-01-20	2011	1	1	1	1-2011	Fever	8.43381	2. Highland Epidemic	MDR184	1. 0 - 5 years
KCH1305206	Kericho DH	5/7/2013	Kericho	Male	Kericho	Yes	<2weeks	No				No			Dizziness	2	67	38	82	Malaria		92250					Highland Epidemic	42	Above 15 years	Wild type	Wild type	Wild type	2013-05-07	2013	2	0	0	2-2013	Others	11.4323	2. Highland Epidemic		3. Above 15 years
KSI1203251	Kisii DH	3/27/2012	Kisii	Male	Kisii	Yes	2-4 weeks	Yes	6		2	No			Fever	3	69	39.7	88	Malaria		45000					Highland Epidemic	23	Above 15 years	Mutant	Wild type	Mutant	2012-03-27	2012	1	1	1	1-2012	Fever	10.7144	2. Highland Epidemic	MDR184	3. Above 15 years
KSI1310427	Kisii DH	10/23/2013	KISII	Male	Kisii	No		No				No			Fever	2	9	38.4	98			5240					Highland Epidemic	0	0 - 5 years	Wild type	Wild type	Wild type	2013-10-23	2013	4	0	0	4-2013	Fever	8.56408	2. Highland Epidemic		1. 0 - 5 years
KSI1407612	Kisii DH	7/2/2014	KISII	Male	Kisii	No		Yes	2		1	No			Fever		23.5	38	78	Malaria		10720					Highland Epidemic	7	6 - 15 years	Wild type	Wild type	Wild type	2014-07-02	2014	3	0	0	3-2014	Fever	9.27987	2. Highland Epidemic		2. 6 - 15 years
KSI0804003	Kisii DH	4/4/2008	KISII	Male	Kisii	No		Yes		1	2	Yes	Fansidar	Hospital/Dispensary	Fever	3	12.5	37.7	110	Malaria	Anaemia	12040					Highland Epidemic	3	0 - 5 years	Mutant	Wild type	Wild type	2008-04-04	2008	2	1	1	2-2008	Fever	9.39599	2. Highland Epidemic	CRT76	1. 0 - 5 years
KSI1201232	Kisii DH	1/19/2012	Kisii	Male	Kisii	Yes	<2weeks	No				No			Joint Pains	3	65.5	37.4	86	Malaria		4720					Highland Epidemic	23	Above 15 years	wild type/Mutant	wild type/Mutant	undetermined	2012-01-19	2012	1	0	0	1-2012	Joint Pains	8.45956	2. Highland Epidemic		3. Above 15 years
KSI1401471	Kisii DH	1/27/2014	KISII	Female	Kisii	Yes	<2weeks	Yes		2	3	Yes	Quinine	Hospital/Dispensary	Fever	3	10.6	39.1	74	Malaria		9560					Highland Epidemic	1	0 - 5 years	wild type/Mutant	Wild type	Wild type	2014-01-27	2014	1	0	0	1-2014	Fever	9.16534	2. Highland Epidemic		1. 0 - 5 years
KSI1203249	Kisii DH	3/19/2012	Kisii	Female	Kisii	No		Yes		6	2	No			Fever	5	49	40.1	88	Malaria		85500					Highland Epidemic	13	6 - 15 years	Mutant	Wild type	Mutant	2012-03-19	2012	1	1	1	1-2012	Fever	11.3563	2. Highland Epidemic	MDR184	2. 6 - 15 years
KSI0803003	Kisii DH	3/20/2008	KISII	Male	Kisii	Yes	2-4 weeks	Yes		1	3	Yes	Amodiaquine	Self	Fever	3	12	38.1	102	Malaria	RTI						Highland Epidemic	2	0 - 5 years	Mutant	Mutant	wild type/Mutant	2008-03-20	2008	1	1	1	1-2008	Fever		2. Highland Epidemic	MDR86	1. 0 - 5 years
KCH0804004	Kericho DH	4/8/2008	Kericho	Female	Kericho	Yes	<2weeks	Yes		4	2	Yes	Quinine	Hospital/Dispensary	Fever		11	40.1	108	Malaria		528750					Highland Epidemic	1	0 - 5 years	Wild type	wild type/Mutant	Wild type	2008-04-08	2008	2	0	0	2-2008	Fever	13.1783	2. Highland Epidemic		1. 0 - 5 years
KSI1208280	Kisii DH	8/21/2012	Kisii	Male	Kisii	No		Yes		3	2	No			Fever	4	28	39.4	78	Malaria		58500					Highland Epidemic	9	6 - 15 years	undetermined	Wild type	Wild type	2012-08-21	2012	3	0	2	2-2013	Fever	10.9768	2. Highland Epidemic		2. 6 - 15 years
KSI1203250	Kisii DH	3/20/2012	Kisii	Female	Kisii	No		Yes		4	3	No			Fever	3	16	39.5	80	Malaria		155250					Highland Epidemic	6	6 - 15 years	undetermined	Wild type	Mutant	2012-03-20	2012	1	1	2	1-2012	Fever	11.9528	2. Highland Epidemic	MDR184	2. 6 - 15 years
KCH1111156	Kericho DH	11/15/2011	Kericho	Female	Kericho	Yes	2-4 weeks	No				No			Headache	1	64	38.8	87	Malaria		33480					Highland Epidemic	22	Above 15 years	undetermined	Wild type	Wild type	2011-11-15	2011	4	0	2	4-2011	Headache	10.4187	2. Highland Epidemic		3. Above 15 years
KSI1402481	Kisii DH	2/11/2014	KISII	Male	Kisii	No		Yes		6		No			Fever	2	11	38.4	78	Malaria		5480					Highland Epidemic	2	0 - 5 years	Wild type	Wild type	Wild type	2014-02-11	2014	1	0	0	1-2014	Fever	8.60886	2. Highland Epidemic		1. 0 - 5 years
KSI1402480	Kisii DH	2/6/2014	KISII	Female	Kisii	No		Yes		9	2	No			Fever	2	18	38.9	78	Malaria		5840					Highland Epidemic	6	6 - 15 years	Wild type	Wild type	Mutant	2014-02-06	2014	1	1	0	1-2014	Fever	8.67249	2. Highland Epidemic	MDR184	2. 6 - 15 years
KCH0803001	Kericho DH	3/31/2008	Kericho	Female	Kericho	No		Yes			2	Yes	Other	Hospital/Dispensary	Headache	3	56	37.2	84	Malaria	Typhoid						Highland Epidemic	16	Above 15 years	Mutant	undetermined	undetermined	2008-03-31	2008	1	1	1	1-2008	Headache		2. Highland Epidemic	CRT76	3. Above 15 years
KSI1207272	Kisii DH	7/3/2012	Kisii	Male	Kisii	No		Yes	3		1	No			Stomachache	3	67	37.4	64	Malaria		7360					Highland Epidemic	20	Above 15 years	Wild type	Wild type	Wild type	2012-07-03	2012	3	0	0	2-2013	Others	8.90382	2. Highland Epidemic		3. Above 15 years
KSI1402496	Kisii DH	2/24/2014	KISII	Female	Kisii	No		Yes	3		1	No			Fever	2	70	37.8	68	Malaria		7080					Highland Epidemic	57	Above 15 years	Wild type	Wild type	Wild type	2014-02-24	2014	1	0	0	1-2014	Fever	8.86503	2. Highland Epidemic		3. Above 15 years
KSI1405574	Kisii DH	5/29/2014	KISII	Male	Kisii	No		Yes		6	1	No			Fever	2	16	39.2	74	Malaria		2760					Highland Epidemic	4	0 - 5 years	Wild type	Wild type	Wild type	2014-05-29	2014	2	0	0	2-2014	Fever	7.92299	2. Highland Epidemic		1. 0 - 5 years
KSI1405567	Kisii DH	5/27/2014	KISII	Female	Kisii	Yes	2-4 weeks	Yes	1		1	No			Fever	3	57	36.6	72	Malaria		6240					Highland Epidemic	22	Above 15 years	Wild type	Wild type	wild type/Mutant	2014-05-27	2014	2	0	0	2-2014	Fever	8.73874	2. Highland Epidemic		3. Above 15 years
KSI1403520	Kisii DH	3/26/2014	KISII	Male	Kisii	No		Yes		6	2	No			Fever	3	15	39.4	74			195750					Highland Epidemic	6	6 - 15 years	Wild type	Wild type	Wild type	2014-03-26	2014	1	0	0	1-2014	Fever	12.1846	2. Highland Epidemic		2. 6 - 15 years
KSI1406594	Kisii DH	6/18/2014	KISII	Female	Kisii	No		Yes		6	2	No			Fever	2	13	39.4	72	Malaria		238500					Highland Epidemic	1	0 - 5 years	Wild type	Wild type	Wild type	2014-06-18	2014	2	0	0	2-2014	Fever	12.3821	2. Highland Epidemic		1. 0 - 5 years
KSI1205262	Kisii DH	5/3/2012	Kisii	Female	Kisii	Yes	2-4 weeks	Yes	1		1	No			Headache	4	32	39.9	78	Malaria		9560					Highland Epidemic	11	6 - 15 years	Wild type	Wild type	Mutant	2012-05-03	2012	2	1	0	2-2012	Headache	9.16534	2. Highland Epidemic	MDR184	2. 6 - 15 years
KSI1207273	Kisii DH	7/16/2012	Kisii	Female	Kisii	No		Yes	2		1	No			Fever	3	60	38.6	78	Malaria		2760					Highland Epidemic	35	Above 15 years	Mutant	Wild type	Wild type	2012-07-16	2012	3	1	1	2-2013	Fever	7.92299	2. Highland Epidemic	CRT76	3. Above 15 years
KCH0903057	Kericho DH	3/2/2009	Kericho	Male	Kericho	Yes	<2weeks	Yes	2			No			Headache	1	62	37.6	82	Malaria		480			80		Highland Epidemic	27	Above 15 years	Mutant	Mutant	undetermined	2009-03-02	2009	1	1	1	1-2009	Headache	6.17379	2. Highland Epidemic	MDR86	3. Above 15 years
KSI1110204	Kisii DH	10/12/2011	Kisii	Male	Kisii	Yes	2-4 weeks	Yes		2	3	No			Fever	3	9.5	38.7	72	Malaria		3760					Highland Epidemic	3	0 - 5 years	Wild type	wild type/Mutant	Mutant	2011-10-12	2011	4	1	0	4-2011	Fever	8.23217	2. Highland Epidemic	MDR184	1. 0 - 5 years
KCH1001080	Kericho DH	1/18/2010	Kericho	Male	Kericho	Yes	<2weeks	Yes		6	1	No			Fever	3	11	39.5	98	Malaria		2400					Highland Epidemic	2	0 - 5 years	Mutant	Wild type	Wild type	2010-01-18	2010	1	1	1	1-2010	Fever	7.78322	2. Highland Epidemic	CRT76	1. 0 - 5 years
KCH0808032	Kericho DH	8/21/2008	Kericho	Female	Kericho	Yes	2-4 weeks	Yes			4	Yes	Other	Pharmacist	Fever	4	16	40.3	89	Clinical Malaria		2320					Highland Epidemic	4	0 - 5 years	Mutant	Mutant	Wild type	2008-08-21	2008	3	1	1	3-2008	Fever	7.74932	2. Highland Epidemic	MDR86	1. 0 - 5 years
KSI1406604	Kisii DH	7/25/2014	KISII	Male	Kisii	No		Yes		4	2	No			Fever	2	11.5	39	88	Malaria							Highland Epidemic	3	0 - 5 years	Mutant	Wild type	Mutant	2014-07-25	2014	3	1	1	3-2014	Fever		2. Highland Epidemic	MDR184	1. 0 - 5 years
KCH1307213	Kericho DH	7/3/2013	Kerichi	Female	Kericho	No		Yes			1	Yes		Hospital/Dispensary	Fever	7	19	37.8	100	Malaria		18920					Highland Epidemic	6	6 - 15 years	Wild type	Wild type	wild type/Mutant	2013-07-03	2013	3	0	0	3-2013	Fever	9.84797	2. Highland Epidemic		2. 6 - 15 years
KSI1402479	Kisii DH	2/4/2014	KISII	Female	Kisii	No		Yes	2		1	No			Fever	2	24	38.7	78			12800					Highland Epidemic	7	6 - 15 years	Wild type	Wild type	Mutant	2014-02-04	2014	1	1	0	1-2014	Fever	9.4572	2. Highland Epidemic	MDR184	2. 6 - 15 years
KSI1108199	Kisii DH	8/22/2011	KISII	Male	Kisii	No		No				No			Fever	3	9	39.4	84	Malaria		15360					Highland Epidemic	0	0 - 5 years	Wild type	undetermined	undetermined	2011-08-22	2011	3	0	0	3-2011	Fever	9.63952	2. Highland Epidemic		1. 0 - 5 years
KCH1402243	Kericho DH	2/27/2014	Kericho	Male	Kericho	Yes	2-4 weeks	No				No			Fever	2	11	39.4	100	Malaria							Highland Epidemic	1	0 - 5 years	Wild type	undetermined	Mutant	2014-02-27	2014	1	1	0	1-2014	Fever		2. Highland Epidemic	MDR184	1. 0 - 5 years
KCH1006124	Kericho DH	6/21/2010	Kericho	Male	Kericho	Yes	<2weeks	Yes		3	1	No			Fever	1	11	39.1	90	Malaria		7840					Highland Epidemic	1	0 - 5 years	Mutant	Wild type	undetermined	2010-06-21	2010	2	1	1	2-2010	Fever	8.96699	2. Highland Epidemic	CRT76	1. 0 - 5 years
KSI1209290	Kisii DH	9/6/2012	Kisii	Female	Kisii	No		Yes		8	2	No			Fever	3	13	39.4	80	Malaria		5960					Highland Epidemic	2	0 - 5 years	undetermined	Wild type	Wild type	2012-09-06	2012	3	0	2	2-2013	Fever	8.69283	2. Highland Epidemic		1. 0 - 5 years
KCH0812047	Kericho DH	12/3/2008	Kericho	Female	Kericho	Yes	<2weeks	Yes		2	3	Yes	Other	Pharmacist	Fever	3	12	40.2	102	Malaria		880					Highland Epidemic	3	0 - 5 years	Mutant	Wild type	Wild type	2008-12-03	2008	4	1	1	4-2008	Fever	6.77992	2. Highland Epidemic	CRT76	1. 0 - 5 years
KSI1204255	Kisii DH	4/11/2012	Kisii	Male	Kisii	No		Yes		4	2	No			Fever	2	10	39.3	84	Malaria							Highland Epidemic	1	0 - 5 years	undetermined	undetermined	Wild type	2012-04-11	2012	2	0	2	2-2012	Fever		2. Highland Epidemic		1. 0 - 5 years
KCH1001076	Kericho DH	1/8/2010	Kericho	Male	Kericho	Yes	2-4 weeks	No				No			Fever	2	12	39.2	101	Malaria		7720					Highland Epidemic	2	0 - 5 years	Mutant	wild type/Mutant	undetermined	2010-01-08	2010	1	1	1	1-2010	Fever	8.95157	2. Highland Epidemic	CRT76	1. 0 - 5 years
KCH1404250	Kericho DH	4/11/2014	Kericho	Male	Kericho	No		No				No			Headache	1	65	38.7	74	Clinical Malaria		2440					Highland Epidemic	28	Above 15 years	wild type/Mutant	Wild type	wild type/Mutant	2014-04-11	2014	2	0	0	2-2014	Headache	7.79975	2. Highland Epidemic		3. Above 15 years
KCH1304201	Kericho DH	4/16/2013	Kericho	Male	Kericho	Yes	2-4 weeks	No				No			Headache	3	48	37.8	90	Malaria		7880					Highland Epidemic	19	Above 15 years	Wild type	Wild type	Mutant	2013-04-16	2013	2	1	0	2-2013	Headache	8.97208	2. Highland Epidemic	MDR184	3. Above 15 years
KSI1407625	Kisii DH	7/31/2014	KISII	Male	Kisii	No		Yes	2		1	No			Fever	3	21	39.9	80	Malaria		7160					Highland Epidemic	6	6 - 15 years	Wild type	Wild type	Wild type	2014-07-31	2014	3	0	0	3-2014	Fever	8.87627	2. Highland Epidemic		2. 6 - 15 years
KCH0805016	Kericho DH	5/22/2008	Kericho	Male	Kericho	Yes	<2weeks	Yes		9	2	No			Headache	3	52	37.6	76	Malaria	Typhoid						Highland Epidemic	33	Above 15 years	Mutant	undetermined	Wild type	2008-05-22	2008	2	1	1	2-2008	Headache		2. Highland Epidemic	CRT76	3. Above 15 years
KSI1304334	Kisii DH	4/23/2013	Kisii	Male	Kisii	No		Yes		8	2	No			Fever	4	60	37.5	74	Malaria		2880					Highland Epidemic	19	Above 15 years	Wild type	Wild type	Wild type	2013-04-23	2013	2	0	0	2-2013	Fever	7.96555	2. Highland Epidemic		3. Above 15 years
KCH1104143	Kericho DH	4/27/2011	Kericho	Male	Kericho	No		Yes		6	1	No			Fever	2	11	38.1	100	Malaria		4480					Highland Epidemic	2	0 - 5 years	Mutant	wild type/Mutant	Mutant	2011-04-27	2011	2	1	1	2-2013	Fever	8.40738	2. Highland Epidemic	MDR184	1. 0 - 5 years
KCH1401233	Kericho DH	1/8/2014	Kericho	Male	Kericho	Yes	2-4 weeks	Yes	4		1	No			Headache	1	27	37.5	98	Malaria		4320					Highland Epidemic	10	6 - 15 years	Wild type	Wild type	Mutant	2014-01-08	2014	1	1	0	1-2014	Headache	8.37101	2. Highland Epidemic	MDR184	2. 6 - 15 years
KSI1206269	Kisii DH	6/28/2012	Kisii	Male	Kisii	No		Yes		3	2	No			Fever	2	9.5	38.2	74	Malaria							Highland Epidemic	1	0 - 5 years	undetermined	undetermined	Mutant	2012-06-28	2012	2	1	2	2-2012	Fever		2. Highland Epidemic	MDR184	1. 0 - 5 years
KSI1406608	Kisii DH	6/26/2014	KISII	Male	Kisii	No		Yes	2		1	No			Fever	2	23	38.9	74	Malaria		7960					Highland Epidemic	9	6 - 15 years	Wild type	Wild type	wild type/Mutant	2014-06-26	2014	2	0	0	2-2014	Fever	8.98218	2. Highland Epidemic		2. 6 - 15 years
KSI1401477	Kisii DH	1/30/2014	KISII	Female	Kisii	No		Yes	3		1	No			Fever	2	52	39.2	88	Malaria		3560					Highland Epidemic	35	Above 15 years	Wild type	Wild type	Mutant	2014-01-30	2014	1	1	0	1-2014	Fever	8.17752	2. Highland Epidemic	MDR184	3. Above 15 years
KSI1407617	Kisii DH	7/22/2014	KISII	Female	Kisii	No		Yes		6	1	No			Fever	2	11	39.4	78	Malaria		110250					Highland Epidemic	2	0 - 5 years	Wild type	Wild type	Wild type	2014-07-22	2014	3	0	0	3-2014	Fever	11.6105	2. Highland Epidemic		1. 0 - 5 years
KCH1307218	Kericho DH	7/23/2013	Kericho	Female	Kericho	Yes	2-4 weeks	No				No			Headache	3	66	37.6	80	Malaria		51750					Highland Epidemic	35	Above 15 years	Wild type	Wild type	Mutant	2013-07-23	2013	3	1	0	3-2013	Headache	10.8542	2. Highland Epidemic	MDR184	3. Above 15 years
KSI1404530	Kisii DH	4/14/2014	KISII	Male	Kisii	No		No				No			Fever	1	13.3	40.1	72	Malaria		12400					Highland Epidemic	2	0 - 5 years	Wild type	Wild type	wild type/Mutant	2014-04-14	2014	2	0	0	2-2014	Fever	9.42545	2. Highland Epidemic		1. 0 - 5 years
KSI1407615	Kisii DH	7/8/2014	KISII	Female	Kisii	No		Yes		4	2	No			Fever	2	12.5	39.8	80	Malaria		312750					Highland Epidemic			Wild type	Wild type	Wild type	2014-07-08	2014	3	0	0	3-2014	Fever	12.6532	2. Highland Epidemic
KSI1406600	Kisii DH	6/24/2014	KISII	Female	Kisii	No		No				No			Fever	2	74	37.9	72	Malaria		13160					Highland Epidemic	0	0 - 5 years	Wild type	Wild type	Wild type	2014-06-24	2014	2	0	0	2-2014	Fever	9.48494	2. Highland Epidemic		1. 0 - 5 years
KSI1311438	Kisii DH	11/18/2013	KISII	Female	Kisii	No		Yes		6	2	Yes			Fever	3	9.5	38.8	84	Malaria		4640					Highland Epidemic	2	0 - 5 years	Wild type	Wild type	Wild type	2013-11-18	2013	4	0	0	4-2013	Fever	8.44247	2. Highland Epidemic		1. 0 - 5 years
KCH0905062	Kericho DH	5/26/2009	Kericho	Female	Kericho	Yes	2-4 weeks	No				No			Fever	1	16	40	98	Malaria		680			240		Highland Epidemic	4	0 - 5 years	Wild type	Wild type	Wild type	2009-05-26	2009	2	0	0	2-2009	Fever	6.52209	2. Highland Epidemic		1. 0 - 5 years
KSI1202237	Kisii DH	2/15/2012	Kisii	Male	Kisii	No		Yes	2		1	No			Fever	2	65	38.9	78	Malaria		1040					Highland Epidemic	25	Above 15 years	undetermined	wild type/Mutant	Wild type	2012-02-15	2012	1	0	2	1-2012	Fever	6.94698	2. Highland Epidemic		3. Above 15 years
KSI1111211	Kisii DH	11/7/2011	Kisii	Female	Kisii	No		Yes		7	2	No			Fever	2	21	39.7	74	Malaria		33750					Highland Epidemic	6	6 - 15 years	Mutant	Wild type	undetermined	2011-11-07	2011	4	1	1	4-2011	Fever	10.4267	2. Highland Epidemic	CRT76	2. 6 - 15 years
KSI1304338	Kisii DH	4/25/2013	Kisii	Female	Kisii	No		Yes	3		1	No			Fever	2	50	38.4	80	Malaria		11560					Highland Epidemic	20	Above 15 years	Wild type	Wild type	Mutant	2013-04-25	2013	2	1	0	2-2013	Fever	9.35531	2. Highland Epidemic	MDR184	3. Above 15 years
KSI1203245	Kisii DH	3/12/2012	Kisii	Female	Kisii	No		Yes	2		1	No			Headache	2	30	37.4	78	Malaria		411750					Highland Epidemic	12	6 - 15 years	wild type/Mutant	Wild type	Wild type	2012-03-12	2012	1	0	0	1-2012	Headache	12.9282	2. Highland Epidemic		2. 6 - 15 years
KSI1403514	Kisii DH	3/11/2014	KISII	Female	Kisii	No		Yes	2		1	No			Headache	2	30	36.5	72	Malaria		10760					Highland Epidemic	12	6 - 15 years	Wild type	Wild type	Mutant	2014-03-11	2014	1	1	0	1-2014	Headache	9.28359	2. Highland Epidemic	MDR184	2. 6 - 15 years
KSI1207274	Kisii DH	7/19/2012	Kisii	Male	Kisii	No		Yes		4	2	No			Fever	2	8.5	38.7	84	Malaria		15120					Highland Epidemic	1	0 - 5 years	Wild type	Wild type	Wild type	2012-07-19	2012	3	0	0	2-2013	Fever	9.62377	2. Highland Epidemic		1. 0 - 5 years
KSI1403515	Kisii DH	3/18/2014	KISII	Female	Kisii	No		Yes	1		1	No			Fever	3	13	38.6	72	Malaria		402750					Highland Epidemic	5	0 - 5 years	Wild type	Wild type	Wild type	2014-03-18	2014	1	0	0	1-2014	Fever	12.9061	2. Highland Epidemic		1. 0 - 5 years
KCH1001083	Kericho DH	1/25/2010	Kericho	Male	Kericho	Yes	<2weeks	Yes		2	3	No			Fever	1	10	38	108	Malaria		11600					Highland Epidemic	1	0 - 5 years	wild type/Mutant	Wild type	Wild type	2010-01-25	2010	1	0	0	1-2010	Fever	9.35876	2. Highland Epidemic		1. 0 - 5 years
KCH0812048	Kericho DH	12/4/2008	Kericho	Male	Kericho	Yes	<2weeks	No				No				3	28	38.4	88	Malaria		520					Highland Epidemic	4	0 - 5 years	Mutant	Wild type	Mutant	2008-12-04	2008	4	1	1	4-2008		6.25383	2. Highland Epidemic	MDR184	1. 0 - 5 years
KCH1105145	Kericho DH	5/17/2011	Kericho	Female	Kericho	Yes	2-4 weeks	No				No			Vomiting	1	13	37.6	100	Malaria		319500					Highland Epidemic	2	0 - 5 years	Wild type	Wild type	Wild type	2011-05-17	2011	2	0	0	2-2013	Others	12.6745	2. Highland Epidemic		1. 0 - 5 years
KSI1405556	Kisii DH	5/15/2014	KISII	Female	Kisii	No		Yes			1	No			Fever	2	9	38.9	78	Malaria		4080					Highland Epidemic	1	0 - 5 years	Wild type	Wild type	Mutant	2014-05-15	2014	2	1	0	2-2014	Fever	8.31385	2. Highland Epidemic	MDR184	1. 0 - 5 years
KCH0807029	Kericho DH	7/30/2008	Kericho	Male	Kericho	Yes	<2weeks	Yes			2	Yes	Metakelfin	Pharmacist	Fever	7	63	38	87	Malaria	Typhoid	1320					Highland Epidemic	31	Above 15 years	undetermined	Mutant	Mutant	2008-07-30	2008	3	1	2	3-2008	Fever	7.18539	2. Highland Epidemic	MDR184	3. Above 15 years
KCH1403245	Kericho DH	3/11/2014	Kericho	Female	Kericho	No		No				No			Fever	2	15.5	39.6	90	Malaria							Highland Epidemic	4	0 - 5 years	Wild type	Mutant	Mutant	2014-03-11	2014	1	1	0	1-2014	Fever		2. Highland Epidemic	MDR184	1. 0 - 5 years
KSI1405558	Kisii DH	5/19/2014	KISII	Male	Kisii	No		Yes		2	2	No			Fever	2	9	39.7	80	Malaria		5960					Highland Epidemic	1	0 - 5 years	Wild type	Wild type	Wild type	2014-05-19	2014	2	0	0	2-2014	Fever	8.69283	2. Highland Epidemic		1. 0 - 5 years
KSI1206268	Kisii DH	6/27/2012	Kisii	Female	Kisii	No		Yes		9	2	No			Fever	3	45	39.3	74	Malaria		840					Highland Epidemic	15	6 - 15 years	wild type/Mutant	Wild type	Wild type	2012-06-27	2012	2	0	0	2-2012	Fever	6.7334	2. Highland Epidemic		2. 6 - 15 years
KSI1407614	Kisii DH	7/7/2014	KISII	Female	Kisii	Yes	2-4 weeks	Yes		4	2	No			Fever	2	9.5	38.9	80	Malaria		220500					Highland Epidemic	2	0 - 5 years	Wild type	Wild type	Mutant	2014-07-07	2014	3	1	0	3-2014	Fever	12.3037	2. Highland Epidemic	MDR184	1. 0 - 5 years
KSI1403517	Kisii DH	3/24/2014	KISII	Male	Kisii	No		Yes		1	2	Yes	Other	Hospital/Dispensary	Fever	2	25	38.3	74	Malaria		6600					Highland Epidemic	10	6 - 15 years	Wild type	Wild type	Mutant	2014-03-24	2014	1	1	0	1-2014	Fever	8.79482	2. Highland Epidemic	MDR184	2. 6 - 15 years
KSI1404536	Kisii DH	4/28/2014	KISII	Female	Kisii	No		Yes	2		1	No			Fever	2	25	38.5	78	Malaria		3840					Highland Epidemic	9	6 - 15 years	Wild type	Wild type	Mutant	2014-04-28	2014	2	1	0	2-2014	Fever	8.25323	2. Highland Epidemic	MDR184	2. 6 - 15 years
KCH1402241	Kericho DH	2/20/2014	Kericho	Male	Kericho	No		Yes		3	2	No			Headache	5	27	40.1	100	Malaria		2800					Highland Epidemic	9	6 - 15 years	Wild type	Wild type	Mutant	2014-02-20	2014	1	1	0	1-2014	Headache	7.93737	2. Highland Epidemic	MDR184	2. 6 - 15 years
KCH1204166	Kericho DH	4/10/2012	Kericho	Male	Kericho	No		No				No			Headache	4	45	39.4	80	Malaria		520					Highland Epidemic	18	Above 15 years	Mutant	Wild type	Wild type	2012-04-10	2012	2	1	1	2-2012	Headache	6.25383	2. Highland Epidemic	CRT76	3. Above 15 years
KSI1405568	Kisii DH	5/26/2014	KISII	Female	Kisii	No		Yes	2		1	No			Fever	2	52	38	78	Malaria		7480					Highland Epidemic	28	Above 15 years	Wild type	Wild type	Wild type	2014-05-26	2014	2	0	0	2-2014	Fever	8.91999	2. Highland Epidemic		3. Above 15 years
KSI1201225	Kisii DH	1/16/2012	Kisii	Female	Kisii	Yes	<2weeks	No				No			Fever	3	74	39.4	74	Malaria		560					Highland Epidemic	54	Above 15 years	Wild type	Wild type	Mutant	2012-01-16	2012	1	1	0	1-2012	Fever	6.32794	2. Highland Epidemic	MDR184	3. Above 15 years
KSI1403512	Kisii DH	3/17/2014	KISII	Male	Kisii	No		Yes	5		1	No			Headache	3	59	36.9	78	Malaria		171000					Highland Epidemic	25	Above 15 years	Wild type	Wild type	Wild type	2014-03-17	2014	1	0	0	1-2014	Headache	12.0494	2. Highland Epidemic		3. Above 15 years
KCH1402239	Kericho DH	2/10/2014	Kericho	Male	Kericho	No		No				No			Headache	5	56	36.1	88	Malaria		9920					Highland Epidemic	20	Above 15 years	Wild type	Wild type	wild type/Mutant	2014-02-10	2014	1	0	0	1-2014	Headache	9.20231	2. Highland Epidemic		3. Above 15 years
KCH1311231	Kericho DH	11/12/2013	Kericho	Female	Kericho	Yes	2-4 weeks	No				No			Headache	1	15	39.1	10	Malaria							Highland Epidemic	4	0 - 5 years	undetermined	Mutant	wild type/Mutant	2013-11-12	2013	4	1	2	4-2013	Headache		2. Highland Epidemic	MDR86	1. 0 - 5 years
KCH1009132	Kericho DH	9/30/2010	Kericho	Male	Kericho	Yes	<2weeks	No				No			Seizure	3	22	38.4	96	Malaria		209250					Highland Epidemic	4	0 - 5 years	Mutant	Wild type	Mutant	2010-09-30	2010	3	1	1	3-2010	Others	12.2513	2. Highland Epidemic	MDR184	1. 0 - 5 years
KCH1008125	Kericho DH	8/16/2010	Kericho	Male	Kericho	Yes	<2weeks	No				No			Headache	5	68	37.9	92	Malaria		20250					Highland Epidemic	24	Above 15 years	Mutant	undetermined	Mutant	2010-08-16	2010	3	1	1	3-2010	Headache	9.91591	2. Highland Epidemic	MDR184	3. Above 15 years
KCH1201159	Kericho DH	1/12/2012	Kericho	Female	Kericho	Yes	<2weeks	No				No			Headache	3	56	37	92	Malaria		360					Highland Epidemic	30	Above 15 years	wild type/Mutant	Wild type	Wild type	2012-01-12	2012	1	0	0	1-2012	Headache	5.8861	2. Highland Epidemic		3. Above 15 years
KSI1402487	Kisii DH	2/13/2014	KISII	Female	Kisii	Yes	<2weeks	Yes	1		1	No			Headache	4	61	37.9	74	Malaria		2760					Highland Epidemic	23	Above 15 years	Wild type	Wild type	wild type/Mutant	2014-02-13	2014	1	0	0	1-2014	Headache	7.92299	2. Highland Epidemic		3. Above 15 years
KSI1304337	Kisii DH	4/24/2013	Kisii	Male	Kisii	No		Yes	4		1	No			Fever	2	24	40	72	Malaria		6280					Highland Epidemic	10	6 - 15 years	Wild type	Wild type	Wild type	2013-04-24	2013	2	0	0	2-2013	Fever	8.74512	2. Highland Epidemic		2. 6 - 15 years
KCH1402238	Kericho DH	2/10/2014	Kericho	Male	Kericho	Yes	2-4 weeks	Yes			3	Yes	Other	Hospital/Dispensary	Headache	3	25	39.3	90	Malaria		1440					Highland Epidemic	11	6 - 15 years	Wild type	Wild type	Wild type	2014-02-10	2014	1	0	0	1-2014	Headache	7.2724	2. Highland Epidemic		2. 6 - 15 years
KSI1405560	Kisii DH	5/20/2014	KISII	Female	Kisii	Yes	2-4 weeks	Yes		8	2	No			Fever	2	32	38	74	Malaria		7920					Highland Epidemic	9	6 - 15 years	Wild type	Wild type	Wild type	2014-05-20	2014	2	0	0	2-2014	Fever	8.97715	2. Highland Epidemic		2. 6 - 15 years
KSI0804012	Kisii DH	4/28/2008	KISII	Male	Kisii	Yes	1-2 months	Yes			2	Yes	Amodiaquine	Self	Fever	2	12	37	106	Malaria	RTI	1200					Highland Epidemic	3	0 - 5 years	Mutant	Mutant	Wild type	2008-04-28	2008	2	1	1	2-2008	Fever	7.09008	2. Highland Epidemic	MDR86	1. 0 - 5 years
KCH0806023	Kericho DH	6/11/2008	Kericho	Male	Kericho	Yes	1-2 months	No				No			Headache	14	53	36.8	86	Malaria		108000					Highland Epidemic	16	Above 15 years	Wild type	Mutant	Wild type	2008-06-11	2008	2	1	0	2-2008	Headache	11.5899	2. Highland Epidemic	MDR86	3. Above 15 years
KCH0901053	Kericho DH	1/12/2009	Kericho	Female	Kericho	Yes	2-4 weeks	Yes			1	No			Coughing	3	21	38.3	100	Malaria		7640			240		Highland Epidemic			Mutant	Wild type	Mutant	2009-01-12	2009	1	1	1	1-2009	Coughing	8.94115	2. Highland Epidemic	MDR184
KCH0805015	Kericho DH	5/21/2008	Kericho	Female	Kericho	Yes	<2weeks	No				No			Fever	5	30	39.5	87	Malaria		51750					Highland Epidemic	11	6 - 15 years	Mutant	wild type/Mutant	wild type/Mutant	2008-05-21	2008	2	1	1	2-2008	Fever	10.8542	2. Highland Epidemic	CRT76	2. 6 - 15 years
KSI1401463	Kisii DH	1/20/2014	KISII	Male	Kisii	Yes	2-4 weeks	Yes		5	2	No			Fever	2	19.5	38.5	78	Malaria		108000					Highland Epidemic	4	0 - 5 years	wild type/Mutant	Wild type	wild type/Mutant	2014-01-20	2014	1	0	0	1-2014	Fever	11.5899	2. Highland Epidemic		1. 0 - 5 years
KCH1308220	Kericho DH	8/22/2014	Kericho	Female	Kericho	Yes	<2weeks	Yes		4	1	No			Headache	3	40	37.3	90	Malaria	RTI	5000					Highland Epidemic	11	6 - 15 years	Wild type	Wild type	wild type/Mutant	2014-08-22	2014	3	0	0	3-2014	Headache	8.51719	2. Highland Epidemic		2. 6 - 15 years
KSI1405566	Kisii DH	5/22/2014	KISII	Female	Kisii	No		Yes	2		1	No			Fever	3	102	38.2	80	Malaria		9080					Highland Epidemic	20	Above 15 years	Wild type	Wild type	Wild type	2014-05-22	2014	2	0	0	2-2014	Fever	9.11383	2. Highland Epidemic		3. Above 15 years
KSI1310431	Kisii DH	10/29/2013	KISII	Female	Kisii	No		Yes	1		2	No			Fever	2	13.5	37.6	76	Malaria							Highland Epidemic	3	0 - 5 years	Wild type	Wild type	Mutant	2013-10-29	2013	4	1	0	4-2013	Fever		2. Highland Epidemic	MDR184	1. 0 - 5 years
KSI1310430	Kisii DH	10/28/2013	KISII	Male	Kisii	No		Yes		9	2	No			Fever	2	17	40	96	Malaria		60750					Highland Epidemic	4	0 - 5 years	Mutant	Wild type	Wild type	2013-10-28	2013	4	1	1	4-2013	Fever	11.0145	2. Highland Epidemic	CRT76	1. 0 - 5 years
KSI1401467	Kisii DH	1/23/2014	KISII	Male	Kisii	Yes	2-4 weeks	Yes	3		3	No			Joint Pains	2	63	37.4	74	Malaria		4360					Highland Epidemic	45	Above 15 years	Wild type	Wild type	Wild type	2014-01-23	2014	1	0	0	1-2014	Joint Pains	8.38023	2. Highland Epidemic		3. Above 15 years
KSI1310414	Kisii DH	10/1/2013	KISII	Male	Kisii	No		Yes		1	2	Yes	Other	Hospital/Dispensary	Fever	3	11	37.9	88	Malaria							Highland Epidemic	2	0 - 5 years	Mutant	Mutant	Mutant	2013-10-01	2013	4	1	1	4-2013	Fever		2. Highland Epidemic	MDR184	1. 0 - 5 years
KSI1310424	Kisii DH	10/17/2013	KISII	Male	Kisii	No		Yes	2		1	No			Fever	3	22	38.8	84	Malaria							Highland Epidemic	6	6 - 15 years	Wild type	wild type/Mutant	wild type/Mutant	2013-10-17	2013	4	0	0	4-2013	Fever		2. Highland Epidemic		2. 6 - 15 years
KSI1111212	Kisii DH	11/8/2011	Kisii	Male	Kisii	No		Yes	2		1	No			Headache	3	30	37.1	72	Malaria		364500					Highland Epidemic	11	6 - 15 years	Wild type	Wild type	Mutant	2011-11-08	2011	4	1	0	4-2011	Headache	12.8063	2. Highland Epidemic	MDR184	2. 6 - 15 years
KSI0805002	Kisii DH	5/16/2008	KISII	Male	Kisii	Yes	<2weeks	Yes	1		1	No			Fever	2	9.5	38.7	100	Malaria	RTI	2960					Highland Epidemic	2	0 - 5 years	Mutant	Mutant	Wild type	2008-05-16	2008	2	1	1	2-2008	Fever	7.99294	2. Highland Epidemic	MDR86	1. 0 - 5 years
KSI1309412	Kisii DH	9/25/2013	KISII	Female	Kisii	No		Yes	1		1	No			Fever	2	12.5	38.4	88	Malaria							Highland Epidemic	3	0 - 5 years	undetermined	wild type/Mutant	wild type/Mutant	2013-09-25	2013	3	0	2	3-2013	Fever		2. Highland Epidemic		1. 0 - 5 years
KCH1208183	Kericho DH	8/30/2012	Kericho	Male	Kericho	No		No				No			Headache	6	81	37.8	84	Malaria	Anaemia						Highland Epidemic	46	Above 15 years	undetermined	undetermined	Wild type	2012-08-30	2012	3	0	2	2-2013	Headache		2. Highland Epidemic		3. Above 15 years
KSI1308396	Kisii DH	8/15/2013	KISII	Female	Kisii	No		Yes	2	0	1	No			Fever	2	35	39.4	80	Malaria		4360					Highland Epidemic	12	6 - 15 years	wild type/Mutant	Wild type	wild type/Mutant	2013-08-15	2013	3	0	0	3-2013	Fever	8.38023	2. Highland Epidemic		2. 6 - 15 years
KSI1407623	Kisii DH	7/30/2014	KISII	Female	Kisii	No		Yes		6	2	No			Fever	2	15.5	38.4	70			6480					Highland Epidemic	6	6 - 15 years	Mutant	undetermined	Mutant	2014-07-30	2014	3	1	1	3-2014	Fever	8.77648	2. Highland Epidemic	MDR184	2. 6 - 15 years
KSI1307373	Kisii DH	7/2/2013	KISII	Female	Kisii	Yes	1-2 months	Yes	0	3	2	No			Fever	2	8.7	38.2	98	Malaria		11560					Highland Epidemic	1	0 - 5 years	wild type/Mutant	Wild type	Wild type	2013-07-02	2013	3	0	0	3-2013	Fever	9.35531	2. Highland Epidemic		1. 0 - 5 years
KSI1403508	Kisii DH	3/12/2014	KISII	Female	Kisii	No		Yes		8	2	No			Fever	3	12	39.4	80	Malaria		245250					Highland Epidemic	2	0 - 5 years	Wild type	Wild type	Mutant	2014-03-12	2014	1	1	0	1-2014	Fever	12.41	2. Highland Epidemic	MDR184	1. 0 - 5 years
KSI1306358	Kisii DH	6/3/2013	Kisii	Female	Kisii	No		Yes	3		1	No			Headache	2	55	36.8	80	Malaria		8520					Highland Epidemic	17	Above 15 years	Mutant	Wild type	Mutant	2013-06-03	2013	2	1	1	2-2013	Headache	9.05017	2. Highland Epidemic	MDR184	3. Above 15 years
KSI1310428	Kisii DH	10/23/2013	KISII	Male	Kisii	No		Yes		8	2	No			Fever	2	18	37.8	96	Malaria		126000					Highland Epidemic	5	0 - 5 years	Wild type	Wild type	Mutant	2013-10-23	2013	4	1	0	4-2013	Fever	11.744	2. Highland Epidemic	MDR184	1. 0 - 5 years
KCH0811043	Kericho DH	11/17/2008	Kericho	Male	Kericho	Yes	<2weeks	Yes			2	Yes	Other	Pharmacist	Fever	4	17	39	94	Clinical Malaria		480					Highland Epidemic	3	0 - 5 years	Mutant	wild type/Mutant	wild type/Mutant	2008-11-17	2008	4	1	1	4-2008	Fever	6.17379	2. Highland Epidemic	CRT76	1. 0 - 5 years
KSI1402489	Kisii DH	2/17/2014	KISII	Male	Kisii	No		Yes	5		0	No			Fever	2	62	38.2	68			10640					Highland Epidemic	21	Above 15 years	Wild type	Wild type	Mutant	2014-02-17	2014	1	1	0	1-2014	Fever	9.27238	2. Highland Epidemic	MDR184	3. Above 15 years
KSI1405572	Kisii DH	5/28/2014	KISII	Male	Kisii	No		Yes	1		1	No			Fever	2	18	40.1	80	Malaria		7560					Highland Epidemic	5	0 - 5 years	Wild type	Wild type	wild type/Mutant	2014-05-28	2014	2	0	0	2-2014	Fever	8.93063	2. Highland Epidemic		1. 0 - 5 years
KSI1406575	Kisii DH	6/3/2014	KISII	Female	Kisii	No		Yes		5	2	No			Fever	2	14.5	37.6	70	Malaria		267750					Highland Epidemic	3	0 - 5 years	Wild type	Wild type	Mutant	2014-06-03	2014	2	1	0	2-2014	Fever	12.4978	2. Highland Epidemic	MDR184	1. 0 - 5 years
KCH0804007	Kericho DH	4/15/2008	Kericho	Female	Kericho	Yes	<2weeks	No				No			Headache	11	65	37.5	88	Malaria		9040					Highland Epidemic	24	Above 15 years	wild type/Mutant	Wild type	Wild type	2008-04-15	2008	2	0	0	2-2008	Headache	9.10941	2. Highland Epidemic		3. Above 15 years
KCH1403248	Kericho DH	3/26/2014	Kericho	Female	Kericho	Yes	2-4 weeks	Yes		8	2	No			Headache	2	65	37.8	74	Malaria		25880					Highland Epidemic	28	Above 15 years	Wild type	Wild type	wild type/Mutant	2014-03-26	2014	1	0	0	1-2014	Headache	10.1612	2. Highland Epidemic		3. Above 15 years
KCH1404251	Kericho DH	5/23/2014	Kericho	Female	Kericho	Yes	2-4 weeks	Yes	1		1	No			Fever	1	62	38	70	Clinical Malaria		8240					Highland Epidemic	28	Above 15 years	wild type/Mutant	Wild type	Wild type	2014-05-23	2014	2	0	0	2-2014	Fever	9.01676	2. Highland Epidemic		3. Above 15 years
KSI1111214	Kisii DH	11/10/2011	Kisii	Male	Kisii	No		Yes			3	Yes	Fansidar	Hospital/Dispensary	Fever	3	13	38.9	74	Malaria		162000					Highland Epidemic	4	0 - 5 years	Mutant	Wild type	wild type/Mutant	2011-11-10	2011	4	1	1	4-2011	Fever	11.9954	2. Highland Epidemic	CRT76	1. 0 - 5 years
KCH1006123	Kericho DH	6/17/2010	Kericho	Male	Kericho	Yes	<2weeks	Yes		3	3	No			Headache	3	67	37.6	80	Malaria		280					Highland Epidemic	23	Above 15 years	wild type/Mutant	Wild type	undetermined	2010-06-17	2010	2	0	0	2-2010	Headache	5.63479	2. Highland Epidemic		3. Above 15 years
KSI1307385	Kisii DH	7/15/2013	KISII	Female	Kisii	No		Yes	4	0	1	No			Headache	2	59	37.8	74	Malaria		9400					Highland Epidemic	35	Above 15 years	Wild type	Wild type	Wild type	2013-07-15	2013	3	0	0	3-2013	Headache	9.14847	2. Highland Epidemic		3. Above 15 years
KCH1305207	Kericho DH	5/22/2013	Kericho	Female	Kericho	Yes	<2weeks	Yes		8	2	No			Fever	2	24	39.1	105	Malaria		297000					Highland Epidemic	6	6 - 15 years	Wild type	Wild type	Mutant	2013-05-22	2013	2	1	0	2-2013	Fever	12.6015	2. Highland Epidemic	MDR184	2. 6 - 15 years
KSI1406577	Kisii DH	6/3/2014	KISII	Female	Kisii	No		Yes	1		1	No			Fever	3	11	40.4	80	Malaria		2360					Highland Epidemic	3	0 - 5 years	Wild type	Wild type	Mutant	2014-06-03	2014	2	1	0	2-2014	Fever	7.76642	2. Highland Epidemic	MDR184	1. 0 - 5 years
KSI1310425	Kisii DH	10/22/2013	KISII	Female	Kisii	No		No				No			Fever	2	9	38.2	88	Malaria		162000					Highland Epidemic	0	0 - 5 years	Wild type	Wild type	Mutant	2013-10-22	2013	4	1	0	4-2013	Fever	11.9954	2. Highland Epidemic	MDR184	1. 0 - 5 years
KCH1205171	Kericho DH	5/14/2012	Kericho	Male	Kericho	Yes	<2weeks	No				No			Fever	3	21	40.1	90	Malaria		2960					Highland Epidemic	5	0 - 5 years	Mutant	wild type/Mutant	wild type/Mutant	2012-05-14	2012	2	1	1	2-2012	Fever	7.99294	2. Highland Epidemic	CRT76	1. 0 - 5 years
KSI1202243	Kisii DH	2/29/2012	Kisii	Female	Kisii	No		Yes	2		1	No			Headache	2	40	37.6	64	Malaria		400					Highland Epidemic	12	6 - 15 years	Wild type	Wild type	Wild type	2012-02-29	2012	1	0	0	1-2012	Headache	5.99146	2. Highland Epidemic		2. 6 - 15 years
KSI1407622	Kisii DH	7/27/2014	KISII	Male	Kisii	Yes	2-4 weeks	Yes		6	2	No			Fever	3	21	39.2	88	Malaria			12880				Highland Epidemic	0	0 - 5 years	Wild type	Wild type	wild type/Mutant	2014-07-27	2014	3	0	0	3-2014	Fever		2. Highland Epidemic		1. 0 - 5 years
KSI1404535	Kisii DH	4/28/2014	KISII	Female	Kisii	No		Yes	1		1	No			Fever	2	21	38.2	78	Malaria		10720					Highland Epidemic	7	6 - 15 years	Wild type	Wild type	Wild type	2014-04-28	2014	2	0	0	2-2014	Fever	9.27987	2. Highland Epidemic		2. 6 - 15 years
KCH1011135	Kericho DH	11/3/2010	Kericho	Female	Kericho	Yes	2-4 weeks	No				No			Fever	3	11.4	37.9	99	Malaria		440					Highland Epidemic	1	0 - 5 years	undetermined	wild type/Mutant	Wild type	2010-11-03	2010	4	0	2	4-2010	Fever	6.08677	2. Highland Epidemic		1. 0 - 5 years
KSI1406584	Kisii DH	6/9/2014	KISII	Female	Kisii	Yes	2-4 weeks	Yes		6	2	No			Fever	2	15.5	38.7	72	Malaria		4760					Highland Epidemic	3	0 - 5 years	Wild type	Wild type	Mutant	2014-06-09	2014	2	1	0	2-2014	Fever	8.468	2. Highland Epidemic	MDR184	1. 0 - 5 years
KSI1405548	Kisii DH	5/12/2014	KISII	Female	Kisii	Yes	<2weeks	Yes	2		1	No			Fever	3	85	39.5	78	Malaria		15120					Highland Epidemic	28	Above 15 years	Wild type	Wild type	wild type/Mutant	2014-05-12	2014	2	0	0	2-2014	Fever	9.62377	2. Highland Epidemic		3. Above 15 years
KSI1305354	Kisii DH	5/20/2013	Kisii	Female	Kisii	No		No				No			Fever	2	7.7	37.9	88	Malaria		680					Highland Epidemic	1	0 - 5 years	undetermined	Wild type	wild type/Mutant	2013-05-20	2013	2	0	2	2-2013	Fever	6.52209	2. Highland Epidemic		1. 0 - 5 years
KSI1204258	Kisii DH	4/18/2012	Kisii	Male	Kisii	No		Yes		2	2	No			Fever	2	69	39.1	84	Malaria		15920					Highland Epidemic	24	Above 15 years	wild type/Mutant	undetermined	Mutant	2012-04-18	2012	2	1	0	2-2012	Fever	9.67533	2. Highland Epidemic	MDR184	3. Above 15 years
KSI1311434	Kisii DH	11/7/2013	KISII	Male	Kisii	No		Yes		8	2	No			Fever	2	12	39.3	88	Malaria		216000					Highland Epidemic	2	0 - 5 years	Wild type	wild type/Mutant	wild type/Mutant	2013-11-07	2013	4	0	0	4-2013	Fever	12.283	2. Highland Epidemic		1. 0 - 5 years
KCH1005117	Kericho DH	5/26/2010	Kericho	Male	Kericho	Yes	2-4 weeks	No				No			Headache	4	33	38.6	88	Malaria		1451250					Highland Epidemic	12	6 - 15 years	wild type/Mutant	Wild type	Wild type	2010-05-26	2010	2	0	0	2-2010	Headache	14.1879	2. Highland Epidemic		2. 6 - 15 years
KCH1202164	Kericho DH	2/16/2012	Kericho	Female	Kericho	No		No				No			Headache	10	43	36	87	Malaria	Anaemia	480					Highland Epidemic	20	Above 15 years	wild type/Mutant	wild type/Mutant	Mutant	2012-02-16	2012	1	1	0	1-2012	Headache	6.17379	2. Highland Epidemic	MDR184	3. Above 15 years
KCH1207173	Kericho DH	7/5/2012	Kericho	Male	Kericho	Yes	<2weeks	Yes		6	2	Yes	Other	Pharmacist	Diarrhea	1	14	38.4	94	Malaria		200					Highland Epidemic	2	0 - 5 years	undetermined	Wild type	Mutant	2012-07-05	2012	3	1	2	2-2013	Others	5.29832	2. Highland Epidemic	MDR184	1. 0 - 5 years
KSI1209288	Kisii DH	9/4/2012	Kisii	Female	Kisii	No		Yes		3	2	No			Fever	3	20	38.2	74	Malaria		38250					Highland Epidemic	3	0 - 5 years	undetermined	Wild type	Wild type	2012-09-04	2012	3	0	2	2-2013	Fever	10.5519	2. Highland Epidemic		1. 0 - 5 years
KCH1401237	Kericho DH	1/21/2014	Kericho	Female	Kericho	Yes	<2weeks	Yes	2		0	No			Fever	1	56	37.3	82	Malaria		3480					Highland Epidemic	19	Above 15 years	Wild type	Wild type	wild type/Mutant	2014-01-21	2014	1	0	0	1-2014	Fever	8.15479	2. Highland Epidemic		3. Above 15 years
KSI1209287	Kisii DH	9/4/2012	Kisii	Female	Kisii	No		Yes		8	1	No			Fever	3	20	38.9	70	Malaria		1040					Highland Epidemic	4	0 - 5 years	undetermined	Wild type	Wild type	2012-09-04	2012	3	0	2	2-2013	Fever	6.94698	2. Highland Epidemic		1. 0 - 5 years
KCH1207174	Kericho DH	7/5/2012	Kericho	Male	Kericho	No		No				No			Fever	4	12	39.4	102	Malaria		2360					Highland Epidemic	1	0 - 5 years	undetermined	Wild type	Mutant	2012-07-05	2012	3	1	2	2-2013	Fever	7.76642	2. Highland Epidemic	MDR184	1. 0 - 5 years
KCH1006120	Kericho DH	6/9/2010	Kericho	Female	Kericho	Yes	1-2 months	Yes	7			No			Headache	6	64	38	78	Malaria		14480					Highland Epidemic	18	Above 15 years	wild type/Mutant	Wild type	Wild type	2010-06-09	2010	2	0	0	2-2010	Headache	9.58052	2. Highland Epidemic		3. Above 15 years
KCH1407269	Kericho DH	7/31/2014	Kericho	Female	Kericho	No		Yes		3	2	No			Headache	3	65	36.4	81	Malaria							Highland Epidemic	28	Above 15 years	Wild type	wild type/Mutant	Wild type	2014-07-31	2014	3	0	0	3-2014	Headache		2. Highland Epidemic		3. Above 15 years
KSI1404532	Kisii DH	4/16/2014	KISII	Male	Kisii	No		No				No			Fever	2	12	38.1	78			7920					Highland Epidemic	2	0 - 5 years	Mutant	Wild type	Mutant	2014-04-16	2014	2	1	1	2-2014	Fever	8.97715	2. Highland Epidemic	MDR184	1. 0 - 5 years
KCH1301197	Kericho DH	1/15/2013	Kericho	Male	Kericho	Yes	<2weeks	Yes		4	1	No			Headache	4	71	37.9	84	Malaria	Typhoid	320					Highland Epidemic	22	Above 15 years	wild type/Mutant	Wild type	Mutant	2013-01-15	2013	1	1	0	2-2013	Headache	5.76832	2. Highland Epidemic	MDR184	3. Above 15 years
KCH0903060	Kericho DH	3/23/2009	Kericho	Female	Kericho	Yes	<2weeks	Yes		8	1	No			Stomachache	4	16	36.3	108	Malaria		3040			720		Highland Epidemic	5	0 - 5 years	Mutant	Mutant	Wild type	2009-03-23	2009	1	1	1	1-2009	Others	8.01961	2. Highland Epidemic	MDR86	1. 0 - 5 years
KCH0810042	Kericho DH	10/13/2008	Kericho	Female	Kericho	Yes	1-2 months	Yes		5	2	No			Fever	6	17	38.4	98	Clinical Malaria	Anaemia	2680					Highland Epidemic	5	0 - 5 years	Mutant	Mutant	Wild type	2008-10-13	2008	4	1	1	4-2008	Fever	7.89357	2. Highland Epidemic	MDR86	1. 0 - 5 years
KCH1002086	Kericho DH	2/11/2010	Kericho	Male	Kericho	Yes	2-4 weeks	Yes		6	1	No			Headache	5	63	36	83	Malaria		640					Highland Epidemic	55	Above 15 years	wild type/Mutant	wild type/Mutant	Wild type	2010-02-11	2010	1	0	0	1-2010	Headache	6.46147	2. Highland Epidemic		3. Above 15 years
KSI1209289	Kisii DH	9/6/2012	Kisii	Female	Kisii	No		Yes		3	2	No			Fever	3	10	38.6	64	Malaria		9040					Highland Epidemic	1	0 - 5 years	undetermined	Wild type	Wild type	2012-09-06	2012	3	0	2	2-2013	Fever	9.10941	2. Highland Epidemic		1. 0 - 5 years
KSI1403523	Kisii DH	3/27/2014	KISII	Male	Kisii	No		Yes		8	2	No			Coughing	2	13	35.4	66	Malaria		6760					Highland Epidemic	2	0 - 5 years	Mutant	Wild type	Mutant	2014-03-27	2014	1	1	1	1-2014	Coughing	8.81878	2. Highland Epidemic	MDR184	1. 0 - 5 years
KCH0806025	Kericho DH	6/17/2008	Kericho	Male	Kericho	Yes	<2weeks	Yes		3	2	No			Headache	6	61	37.2	84	Malaria		21080					Highland Epidemic	24	Above 15 years	Mutant	wild type/Mutant	Wild type	2008-06-17	2008	2	1	1	2-2008	Headache	9.95608	2. Highland Epidemic	CRT76	3. Above 15 years
KCH1301193	Kericho DH	1/9/2013	Kericho	Female	Kericho	Yes	<2weeks	Yes		6	1	No			Headache	1	17	39.2	101	Malaria		7320					Highland Epidemic	6	6 - 15 years	Mutant	Wild type	Wild type	2013-01-09	2013	1	1	1	2-2013	Headache	8.89837	2. Highland Epidemic	CRT76	2. 6 - 15 years
KSI1401458	Kisii DH	1/15/2014	KISII	Male	Kisii	No		Yes	2		1	No			Fever	2	41.5	38.7	96	Malaria		5200					Highland Epidemic	4	0 - 5 years	wild type/Mutant	Wild type	Wild type	2014-01-15	2014	1	0	0	1-2014	Fever	8.55641	2. Highland Epidemic		1. 0 - 5 years
KSI1406595	Kisii DH	6/18/2014	KISII	Male	Kisii	No		Yes		3	2	No			Fever	2	11.5	38.6	68	Malaria		297000					Highland Epidemic	1	0 - 5 years	Mutant	Wild type	Wild type	2014-06-18	2014	2	1	1	2-2014	Fever	12.6015	2. Highland Epidemic	CRT76	1. 0 - 5 years
KSI1401452	Kisii DH	1/8/2014	KISII	Male	Kisii	No		No				No			Fever	2	22.3	39.4	78	Malaria		175500					Highland Epidemic	6	6 - 15 years	Wild type	Wild type	wild type/Mutant	2014-01-08	2014	1	0	0	1-2014	Fever	12.0754	2. Highland Epidemic		2. 6 - 15 years
KSI1201233	Kisii DH	1/23/2012	Kisii	Male	Kisii	No		Yes		4	0	No			Fever	3	14.5	40.1	88	Malaria		560					Highland Epidemic	4	0 - 5 years	Mutant	wild type/Mutant	wild type/Mutant	2012-01-23	2012	1	1	1	1-2012	Fever	6.32794	2. Highland Epidemic	CRT76	1. 0 - 5 years
KSI1404538	Kisii DH	4/29/2014	KISII	Female	Kisii	No		Yes	2		1	No			Fever	2	22	40	88	Malaria		12360					Highland Epidemic	9	6 - 15 years	Wild type	Wild type	Wild type	2014-04-29	2014	2	0	0	2-2014	Fever	9.42222	2. Highland Epidemic		2. 6 - 15 years
KSI1207271	Kisii DH	7/2/2012	Kisii	Female	Kisii	Yes	<2weeks	Yes	1		1	Yes	Fansidar		Headache	4	56	39.2	74	Clinical Malaria		7360					Highland Epidemic	13	6 - 15 years	Wild type	Wild type	Wild type	2012-07-02	2012	3	0	0	2-2013	Headache	8.90382	2. Highland Epidemic		2. 6 - 15 years
KCH1309224	Kericho DH	9/5/2013	Kericho	Male	Kericho	Yes	2-4 weeks	No				No			Headache	2	40	36.1	80	Malaria		1400					Highland Epidemic	14	6 - 15 years	Wild type	Wild type	wild type/Mutant	2013-09-05	2013	3	0	0	3-2013	Headache	7.24423	2. Highland Epidemic		2. 6 - 15 years
KSI1407613	Kisii DH	7/7/2014	KISII	Male	Kisii	No		Yes		6	2	No			Fever	2	13.5	38.5	70	Malaria		12760					Highland Epidemic	3	0 - 5 years	Wild type	Wild type	wild type/Mutant	2014-07-07	2014	3	0	0	3-2014	Fever	9.45407	2. Highland Epidemic		1. 0 - 5 years
KCH0806024	Kericho DH	6/11/2008	Kericho	Male	Kericho	Yes	<2weeks	Yes		1	3	Yes	Quinine		Fever	4	15	38.6	92	Malaria		42750					Highland Epidemic	4	0 - 5 years	wild type/Mutant	Wild type	Mutant	2008-06-11	2008	2	1	0	2-2008	Fever	10.6631	2. Highland Epidemic	MDR184	1. 0 - 5 years
KSI1201228	Kisii DH	1/18/2012	Kisii	Male	Kisii	No		Yes		3	2	No			Headache	3	15	38.4	74	Malaria		11480					Highland Epidemic	4	0 - 5 years	Wild type	Wild type	wild type/Mutant	2012-01-18	2012	1	0	0	1-2012	Headache	9.34836	2. Highland Epidemic		1. 0 - 5 years
KSI1403519	Kisii DH	3/24/2014	KISII	Female	Kisii	Yes	2-4 weeks	Yes	1		1	No			Joint Pains	2	63	36.1	68	Malaria		8360					Highland Epidemic	32	Above 15 years	Wild type	Wild type	Wild type	2014-03-24	2014	1	0	0	1-2014	Joint Pains	9.03121	2. Highland Epidemic		3. Above 15 years
KSI1406605	Kisii DH	7/26/2014	KISII	Female	Kisii	No		Yes		2		No			Fever	2	11	38.4	72	Malaria		6760					Highland Epidemic	2	0 - 5 years	Wild type	Wild type	wild type/Mutant	2014-07-26	2014	3	0	0	3-2014	Fever	8.81878	2. Highland Epidemic		1. 0 - 5 years
KSI1405569	Kisii DH	5/26/2014	KISII	Female	Kisii	No		Yes		6	2	No			Fever	2	13	38.8	70	Malaria		7080					Highland Epidemic	3	0 - 5 years	Wild type	Wild type	Wild type	2014-05-26	2014	2	0	0	2-2014	Fever	8.86503	2. Highland Epidemic		1. 0 - 5 years
KSI1405544	Kisii DH	5/6/2014	KISII	Male	Kisii	No		Yes		5	2	No			Fever	2	11	39.5	80			670500					Highland Epidemic	1	0 - 5 years	Wild type	Wild type	Wild type	2014-05-06	2014	2	0	0	2-2014	Fever	13.4158	2. Highland Epidemic		1. 0 - 5 years
KSI1304328	Kisii DH	4/18/2013	Kisii	Female	Kisii	Yes	2-4 weeks	Yes	1		1	No			Fever	3	18.5	40	18	Malaria		4560					Highland Epidemic	6	6 - 15 years	Wild type	Wild type	Wild type	2013-04-18	2013	2	0	0	2-2013	Fever	8.42508	2. Highland Epidemic		2. 6 - 15 years
KSI1204260	Kisii DH	4/26/2012	Kisii	Female	Kisii	No		No				No			Fever	2	18.5	40.4	88	Malaria		3400					Highland Epidemic	3	0 - 5 years	Wild type	Wild type	Wild type	2012-04-26	2012	2	0	0	2-2012	Fever	8.13153	2. Highland Epidemic		1. 0 - 5 years
KCH0901054	Kericho DH	1/21/2009	Kericho	Female	Kericho	Yes	<2weeks	No				No			Headache	7	58	37.2	72	Malaria		600			200		Highland Epidemic	24	Above 15 years	Mutant	wild type/Mutant	Wild type	2009-01-21	2009	1	1	1	1-2009	Headache	6.39693	2. Highland Epidemic	CRT76	3. Above 15 years
KCH0804011	Kericho DH	4/24/2008	Kericho	Female	Kericho	Yes	<2weeks	No				No			Seizure	1	9	37	96	Malaria		6840					Highland Epidemic	2	0 - 5 years	wild type/Mutant	Wild type	wild type/Mutant	2008-04-24	2008	2	0	0	2-2008	Others	8.83054	2. Highland Epidemic		1. 0 - 5 years
KSI0804009	Kisii DH	4/15/2008	KISII	Male	Kisii	Yes	2-4 weeks	No				No			Dizziness	2	61	38.3	96	Malaria		920					Highland Epidemic	45	Above 15 years	wild type/Mutant	wild type/Mutant	wild type/Mutant	2008-04-15	2008	2	0	0	2-2008	Others	6.82437	2. Highland Epidemic		3. Above 15 years
KSI1112222	Kisii DH	12/13/2011	Kisii	Female	Kisii	Yes	<2weeks	Yes		4	2	Yes	Quinine	Hospital/Dispensary	Fever	3	12.5	39.2	78	Malaria		9080					Highland Epidemic	4	0 - 5 years	wild type/Mutant	Wild type	Mutant	2011-12-13	2011	4	1	0	4-2011	Fever	9.11383	2. Highland Epidemic	MDR184	1. 0 - 5 years
KCH1002087	Kericho DH	2/11/2010	Kericho	Female	Kericho	Yes	<2weeks	Yes		1	4	Yes	Artenam	Pharmacist	Fever	1	17	38.7	93	Malaria		5040					Highland Epidemic	3	0 - 5 years	wild type/Mutant	Mutant	Wild type	2010-02-11	2010	1	1	0	1-2010	Fever	8.52516	2. Highland Epidemic	MDR86	1. 0 - 5 years
KSI0804001	Kisii DH	4/3/2008	KISII	Female	Kisii	No		Yes	5			No			Backache	3	51	36.3	86	Malaria		2120					Highland Epidemic	17	Above 15 years	wild type/Mutant	Mutant	Wild type	2008-04-03	2008	2	1	0	2-2008	Others	7.65917	2. Highland Epidemic	MDR86	3. Above 15 years
KSI1208281	Kisii DH	8/22/2012	Kisii	Male	Kisii	No		Yes		4	2	No			Fever	2	15	38.4	78	Malaria		2760					Highland Epidemic	3	0 - 5 years	Wild type	Wild type	Wild type	2012-08-22	2012	3	0	0	2-2013	Fever	7.92299	2. Highland Epidemic		1. 0 - 5 years
KSI1405554	Kisii DH	5/15/2014	KISII	Female	Kisii	No		Yes	2		1	No			Fever	2	25	38.6	78	Malaria							Highland Epidemic	5	0 - 5 years	Mutant	undetermined	Wild type	2014-05-15	2014	2	1	1	2-2014	Fever		2. Highland Epidemic	CRT76	1. 0 - 5 years
KSI1111217	Kisii DH	11/17/2011	Kisii	Male	Kisii	No		Yes		4	2	No			Fever	2	11.5	38.5	84	Malaria		40500					Highland Epidemic	1	0 - 5 years	Wild type	Wild type	undetermined	2011-11-17	2011	4	0	0	4-2011	Fever	10.6091	2. Highland Epidemic		1. 0 - 5 years
KSI0803001	Kisii DH	3/17/2008	KISII	Female	Kisii	Yes	<2weeks	Yes		6	2	No			Seizure	1	10.1	37.6	98	Malaria	RTI						Highland Epidemic	1	0 - 5 years	undetermined	Mutant	Wild type	2008-03-17	2008	1	1	2	1-2008	Others		2. Highland Epidemic	MDR86	1. 0 - 5 years
KSI1111215	Kisii DH	11/14/2011	Kisii	Male	Kisii	No		Yes		6	3	No			Fever	3	32	38.2	84	Malaria		200250					Highland Epidemic	14	6 - 15 years	Wild type	Wild type	Wild type	2011-11-14	2011	4	0	0	4-2011	Fever	12.2073	2. Highland Epidemic		2. 6 - 15 years
KSI1208276	Kisii DH	8/6/2012	Kisii	Male	Kisii	Yes	<2weeks	Yes		4	2	No			Fever	2	12	38.7	84	Malaria		47250					Highland Epidemic	3	0 - 5 years	Mutant	Wild type	Wild type	2012-08-06	2012	3	1	1	2-2013	Fever	10.7632	2. Highland Epidemic	CRT76	1. 0 - 5 years
KCH1107150	Kericho DH	7/21/2011	Kericho	Male	Kericho	Yes	<2weeks	No				No			Headache	2	62	40	94	Malaria		675000					Highland Epidemic	32	Above 15 years	wild type/Mutant	Wild type	Mutant	2011-07-21	2011	3	1	0	3-2011	Headache	13.4225	2. Highland Epidemic	MDR184	3. Above 15 years
KSI1209291	Kisii DH	9/12/2012	Kisii	Male	Kisii	No		Yes		8	2	No			Fever	3	19	40	84	Malaria		126000					Highland Epidemic	4	0 - 5 years	undetermined	wild type/Mutant	wild type/Mutant	2012-09-12	2012	3	0	2	2-2013	Fever	11.744	2. Highland Epidemic		1. 0 - 5 years
KSI1110208	Kisii DH	10/26/2011	Kisii	Female	Kisii	No		Yes	2		1	Yes	Metakelfin	Self	Joint Pains	2	55	38.7	74	Malaria		560					Highland Epidemic	47	Above 15 years	Mutant	Wild type	Wild type	2011-10-26	2011	4	1	1	4-2011	Joint Pains	6.32794	2. Highland Epidemic	CRT76	3. Above 15 years
KSI1109203	Kisii DH	9/14/2011	Kisii	Male	Kisii	No		Yes		3	3	Yes	Artenam	Self	Fever	3	10.5	38.5	88	Malaria		1120					Highland Epidemic	1	0 - 5 years	wild type/Mutant	wild type/Mutant	Mutant	2011-09-14	2011	3	1	0	3-2011	Fever	7.02108	2. Highland Epidemic	MDR184	1. 0 - 5 years
KSI1110205	Kisii DH	10/12/2011	Kisii	Female	Kisii	No		Yes		6	2	No			Vomiting	3	11.8	35.8	68	Malaria		920					Highland Epidemic	3	0 - 5 years	Mutant	Wild type	Wild type	2011-10-12	2011	4	1	1	4-2011	Others	6.82437	2. Highland Epidemic	CRT76	1. 0 - 5 years
KSI1405573	Kisii DH	5/29/2014	KISII	Female	Kisii	No		No				No			Fever	2	7.5	39.2	78	Malaria		4640					Highland Epidemic	1	0 - 5 years	Wild type	Wild type	Mutant	2014-05-29	2014	2	1	0	2-2014	Fever	8.44247	2. Highland Epidemic	MDR184	1. 0 - 5 years
KSI1406576	Kisii DH	6/3/2014	KISII	Female	Kisii	No		Yes	1		1	No			Fever	2	12.5	39.1	78	Malaria		2360					Highland Epidemic	4	0 - 5 years	Wild type	Wild type	Mutant	2014-06-03	2014	2	1	0	2-2014	Fever	7.76642	2. Highland Epidemic	MDR184	1. 0 - 5 years
KSI1403510	Kisii DH	3/12/2014	KISII	Male	Kisii	No		Yes	2		1	No			Fever	3	18	38.6	80	Malaria		184500					Highland Epidemic	5	0 - 5 years	Wild type	Wild type	Mutant	2014-03-12	2014	1	1	0	1-2014	Fever	12.1254	2. Highland Epidemic	MDR184	1. 0 - 5 years
KSI1208278	Kisii DH	8/15/2012	Kisii	Male	Kisii	Yes	<2weeks	Yes	3		1	No			Headache	2	47	38.4	78	Malaria		15680					Highland Epidemic	13	6 - 15 years	undetermined	Wild type	Wild type	2012-08-15	2012	3	0	2	2-2013	Headache	9.66014	2. Highland Epidemic		2. 6 - 15 years
KSI1406580	Kisii DH	6/4/2014	KISII	Female	Kisii	No		No				No			Fever	2	10	38.6	78	Malaria		6760					Highland Epidemic	0	0 - 5 years	Wild type	Wild type	wild type/Mutant	2014-06-04	2014	2	0	0	2-2014	Fever	8.81878	2. Highland Epidemic		1. 0 - 5 years
KCH1209184	Kericho DH	9/11/2012	Kericho	Male	Kericho	No		Yes			1	Yes	Other	Hospital/Dispensary	Fever	4	12	38.6	100	Malaria		6560					Highland Epidemic	2	0 - 5 years	undetermined	wild type/Mutant	Mutant	2012-09-11	2012	3	1	2	2-2013	Fever	8.78875	2. Highland Epidemic	MDR184	1. 0 - 5 years
KCH1107147	Kericho DH	7/6/2011	Kericho	Female	Kericho	Yes	<2weeks	No				No			Headache	2	54	38.2	86	Malaria		220500					Highland Epidemic	18	Above 15 years	wild type/Mutant	Wild type	Wild type	2011-07-06	2011	3	0	0	3-2011	Headache	12.3037	2. Highland Epidemic		3. Above 15 years
KCH1301195	Kericho DH	1/14/2013	Kericho	Female	Kericho	Yes	<2weeks	No				No			Seizure	2	19	38.6	102	Malaria		920					Highland Epidemic	5	0 - 5 years	Wild type	Wild type	Mutant	2013-01-14	2013	1	1	0	2-2013	Others	6.82437	2. Highland Epidemic	MDR184	1. 0 - 5 years
KCH1401234	Kericho DH	1/9/2014	Kericho	Male	Kericho	Yes	<2weeks	Yes		8	1	No			Headache	2	40	38.8	84	Malaria		2560					Highland Epidemic	12	6 - 15 years	Wild type	Wild type	wild type/Mutant	2014-01-09	2014	1	0	0	1-2014	Headache	7.84776	2. Highland Epidemic		2. 6 - 15 years
KSI1108198	Kisii DH	8/18/2011	KISII	Female	Kisii	No		Yes		7	2	No			Fever	4	20	38.1	72	Malaria		3360					Highland Epidemic	6	6 - 15 years	Mutant	undetermined	undetermined	2011-08-18	2011	3	1	1	3-2011	Fever	8.1197	2. Highland Epidemic	CRT76	2. 6 - 15 years
KSI1407619	Kisii DH	7/23/2014	KISII	Male	Kisii	No		Yes	1		1	No			Fever	2	14.5	37.8	80			159750					Highland Epidemic	4	0 - 5 years	Wild type	Wild type	Wild type	2014-07-23	2014	3	0	0	3-2014	Fever	11.9814	2. Highland Epidemic		1. 0 - 5 years
KSI1406590	Kisii DH	6/12/2014	KISII	Female	Kisii	No		Yes		6	2	No			Fever	2	9	38.2	70	Malaria		13080					Highland Epidemic	1	0 - 5 years	Wild type	Wild type	Wild type	2014-06-12	2014	2	0	0	2-2014	Fever	9.47884	2. Highland Epidemic		1. 0 - 5 years
KSI1206270	Kisii DH	6/28/2012	Kisii	Female	Kisii	No		Yes		2	3	No			Fever	3	15	37.9	64	Malaria		2760					Highland Epidemic	3	0 - 5 years	Wild type	Wild type	Wild type	2012-06-28	2012	2	0	0	2-2012	Fever	7.92299	2. Highland Epidemic		1. 0 - 5 years
KCH1310229	Kericho DH	10/23/2013	Kericho	Female	Kericho	Yes	<2weeks	No				No			Headache	1	75	37.2	89	Malaria							Highland Epidemic	28	Above 15 years	undetermined	Mutant	wild type/Mutant	2013-10-23	2013	4	1	2	4-2013	Headache		2. Highland Epidemic	MDR86	3. Above 15 years
KSI1112221	Kisii DH	12/1/2011	Kisii	Male	Kisii	No		No				No			Fever	2	50.1	38.2	79	Malaria		11520					Highland Epidemic	14	6 - 15 years	Mutant	Wild type	Wild type	2011-12-01	2011	4	1	1	4-2011	Fever	9.35184	2. Highland Epidemic	CRT76	2. 6 - 15 years
KCH1001082	Kericho DH	1/21/2010	Kericho	Male	Kericho	No		No				No				1	15	36.5	90	Malaria		12800					Highland Epidemic	4	0 - 5 years	undetermined	Wild type	Wild type	2010-01-21	2010	1	0	2	1-2010		9.4572	2. Highland Epidemic		1. 0 - 5 years
KCH0805012	Kericho DH	5/19/2008	Kericho	Female	Kericho	Yes	<2weeks	No				No			Headache	4	20	37.4	86	Clinical Malaria		4120					Highland Epidemic	7	6 - 15 years	Mutant	Wild type	wild type/Mutant	2008-05-19	2008	2	1	1	2-2008	Headache	8.32361	2. Highland Epidemic	CRT76	2. 6 - 15 years
KSI1404537	Kisii DH	4/29/2014	KISII	Female	Kisii	No		Yes		8	2	No			Fever	2	12	38.4	78	Malaria		351000					Highland Epidemic	3	0 - 5 years	Wild type	Wild type	wild type/Mutant	2014-04-29	2014	2	0	0	2-2014	Fever	12.7685	2. Highland Epidemic		1. 0 - 5 years
KCH1005111	Kericho DH	5/10/2010	Kericho	Male	Kericho	Yes	<2weeks	No				No			Headache	4	14.5	38.9	94	Malaria		4160					Highland Epidemic	4	0 - 5 years	undetermined	Wild type	undetermined	2010-05-10	2010	2	0	2	2-2010	Headache	8.33327	2. Highland Epidemic		1. 0 - 5 years
KCH1305208	Kericho DH	5/29/2013	Kericho	Male	Kericho	Yes	2-4 weeks	No				No			Joint Pains	3	66	36.7	85	Malaria		117000					Highland Epidemic	21	Above 15 years	Wild type	Wild type	Wild type	2013-05-29	2013	2	0	0	2-2013	Joint Pains	11.6699	2. Highland Epidemic		3. Above 15 years
KCH1405258	Kericho DH	5/27/2014	Kericho	Female	Kericho	Yes	1-2 months	No				No			Nausea	3	60	37.8	84	Malaria							Highland Epidemic	22	Above 15 years	wild type/Mutant	undetermined	undetermined	2014-05-27	2014	2	0	0	2-2014	Others		2. Highland Epidemic		3. Above 15 years
KCH1407264	Kericho DH	7/14/2014	Kericho	Female	Kericho	No		No				No			Headache	3	12	38.4	97	Malaria		1080					Highland Epidemic	4	0 - 5 years	Wild type	Wild type	Wild type	2014-07-14	2014	3	0	0	3-2014	Headache	6.98472	2. Highland Epidemic		1. 0 - 5 years
KSI1401462	Kisii DH	1/16/2014	KISII	Female	Kisii	No		Yes	1		1	No			Fever	2	17	37.9	379	Malaria		128250					Highland Epidemic	5	0 - 5 years	Wild type	Wild type	Wild type	2014-01-16	2014	1	0	0	1-2014	Fever	11.7617	2. Highland Epidemic		1. 0 - 5 years
KCH0903059	Kericho DH	3/5/2009	Kericho	Male	Kericho	Yes	1-2 months	No				No			Headache	3	71.5	38.4	72	Malaria		640			120		Highland Epidemic	25	Above 15 years	Mutant	Mutant	undetermined	2009-03-05	2009	1	1	1	1-2009	Headache	6.46147	2. Highland Epidemic	MDR86	3. Above 15 years
KSI0808002	Kisii DH	8/7/2008	KISII	Female	Kisii	Yes	<2weeks	Yes		3	2	No			Headache	5	54	37.4	88	Malaria		8320					Highland Epidemic	17	Above 15 years	Mutant	Mutant	Wild type	2008-08-07	2008	3	1	1	3-2008	Headache	9.02642	2. Highland Epidemic	MDR86	3. Above 15 years
KSI1110206	Kisii DH	10/25/2011	Kisii	Female	Kisii	No		Yes		2	2	No			Fever	3	22	38.7	84	Malaria		31500					Highland Epidemic	4	0 - 5 years	Mutant	Wild type	Wild type	2011-10-25	2011	4	1	1	4-2011	Fever	10.3577	2. Highland Epidemic	CRT76	1. 0 - 5 years
KCH1403246	Kericho DH	3/11/2014	Kericho	Male	Kericho	Yes	<2weeks	No				No			Fever	3	13	39.1	100	Clinical Malaria							Highland Epidemic	1	0 - 5 years	undetermined	Mutant	Wild type	2014-03-11	2014	1	1	2	1-2014	Fever		2. Highland Epidemic	MDR86	1. 0 - 5 years
KCH1010133	Kericho DH	10/21/2010	Kericho	Female	Kericho	Yes	2-4 weeks	Yes		4	1	No			Fever	3	12	38.4	98	Malaria		3320					Highland Epidemic	1	0 - 5 years	undetermined	wild type/Mutant	wild type/Mutant	2010-10-21	2010	4	0	2	4-2010	Fever	8.10772	2. Highland Epidemic		1. 0 - 5 years
KCH0804005	Kericho DH	4/9/2008	BOMET	Male	Bomet	Yes	<2weeks	No				No			Headache	5	55	37.4	84	Malaria	Typhoid	38520					Highland Epidemic	52	Above 15 years	Mutant	Mutant	Wild type	2008-04-09	2008	2	1	1	2-2008	Headache	10.5589	2. Highland Epidemic	MDR86	3. Above 15 years
KSI1401473	Kisii DH	1/29/2014	KISII	Female	Kisii	No		Yes		8	2	No			Fever	2	12.5	39.2	80	Malaria		4360					Highland Epidemic	2	0 - 5 years	wild type/Mutant	Wild type	Wild type	2014-01-29	2014	1	0	0	1-2014	Fever	8.38023	2. Highland Epidemic		1. 0 - 5 years
KSI1202236	Kisii DH	2/2/2012	Kisii	Female	Kisii	No		Yes	5		1	No			Fever	6	28	38.6	74	Malaria		880					Highland Epidemic	10	6 - 15 years	Mutant	Wild type	wild type/Mutant	2012-02-02	2012	1	1	1	1-2012	Fever	6.77992	2. Highland Epidemic	CRT76	2. 6 - 15 years
KCH1301194	Kericho DH	1/14/2013	Kericho	Male	Kericho	Yes	2-4 weeks	No				No			Fever	2	19	39.7	88	Malaria		2480					Highland Epidemic	5	0 - 5 years	wild type/Mutant	Wild type	wild type/Mutant	2013-01-14	2013	1	0	0	2-2013	Fever	7.81601	2. Highland Epidemic		1. 0 - 5 years
KSI1308399	Kisii DH	8/26/2013	KISII	Female	Kisii	No		Yes	0	0	1	No			Fever	2	52	37.9	88	Malaria		12720					Highland Epidemic	19	Above 15 years	wild type/Mutant	Mutant	Wild type	2013-08-26	2013	3	1	0	3-2013	Fever	9.45093	2. Highland Epidemic	MDR86	3. Above 15 years
KSI1406602	Kisii DH	6/24/2014	KISII	Male	Kisii	No		Yes	2		1	No			Fever	2	22	38.5	78	Malaria		7960					Highland Epidemic	8	6 - 15 years	Wild type	Wild type	Wild type	2014-06-24	2014	2	0	0	2-2014	Fever	8.98218	2. Highland Epidemic		2. 6 - 15 years
KSI1208284	Kisii DH	8/27/2012	Kisii	Male	Kisii	No		Yes	2		1	No			Fever	4	19	38.5	74	Malaria		1560					Highland Epidemic	9	6 - 15 years	Wild type	Wild type	Wild type	2012-08-27	2012	3	0	0	2-2013	Fever	7.35244	2. Highland Epidemic		2. 6 - 15 years
KSI0804004	Kisii DH	4/7/2008	KISII	Male	Kisii	Yes	1-2 months	Yes		2	3	No			Fever	3	11.5	37.6	100	Malaria	RTI	560					Highland Epidemic	2	0 - 5 years	wild type/Mutant	Wild type	wild type/Mutant	2008-04-07	2008	2	0	0	2-2008	Fever	6.32794	2. Highland Epidemic		1. 0 - 5 years
KSI1401450	Kisii DH	1/6/2014	KISII	Female	Kisii	No		No				No			Fever	1	16.6	39.1	78	Malaria		6280					Highland Epidemic	3	0 - 5 years	Wild type	Wild type	Mutant	2014-01-06	2014	1	1	0	1-2014	Fever	8.74512	2. Highland Epidemic	MDR184	1. 0 - 5 years
KSI1405564	Kisii DH	5/22/2014	KISII	Male	Kisii	No		Yes	1		1	No			Fever	2	15	37.3	78	Malaria		4640					Highland Epidemic	5	0 - 5 years	Wild type	Wild type	Mutant	2014-05-22	2014	2	1	0	2-2014	Fever	8.44247	2. Highland Epidemic	MDR184	1. 0 - 5 years
KSI0807005	Kisii DH	7/31/2008	KISII	Female	Kisii	No		No				No			Fever	2	10.4	37.2	97	Malaria	RTI	1960					Highland Epidemic	2	0 - 5 years	Mutant	Wild type	Wild type	2008-07-31	2008	3	1	1	3-2008	Fever	7.5807	2. Highland Epidemic	CRT76	1. 0 - 5 years
KSI1311442	Kisii DH	11/21/2013	KISII	Female	Kisii	No		Yes	3	0	1	No			Joint Pains	3	42	37.5	78	Malaria		11800					Highland Epidemic	25	Above 15 years	wild type/Mutant	Wild type	Wild type	2013-11-21	2013	4	0	0	4-2013	Joint Pains	9.37585	2. Highland Epidemic		3. Above 15 years
KSI1111218	Kisii DH	11/24/2011	Kisii	Female	Kisii	No		Yes		4	2	No			Fever	2	12	39.4	78	Malaria		6800					Highland Epidemic	2	0 - 5 years	Mutant	Wild type	wild type/Mutant	2011-11-24	2011	4	1	1	4-2011	Fever	8.82468	2. Highland Epidemic	CRT76	1. 0 - 5 years
KSI1403516	Kisii DH	3/20/2014	KISII	Female	Kisii	No		Yes	2		1	No			Fever	2	23	38.3	74	Malaria		10880					Highland Epidemic	9	6 - 15 years	Wild type	Wild type	wild type/Mutant	2014-03-20	2014	1	0	0	1-2014	Fever	9.29468	2. Highland Epidemic		2. 6 - 15 years
KCH1401232	Kericho DH	1/8/2014	Kericho	Female	Kericho	Yes	2-4 weeks	Yes		4	1	Yes			Headache	6	20	37.5	9	Malaria		1680					Highland Epidemic	7	6 - 15 years	Wild type	Wild type	Wild type	2014-01-08	2014	1	0	0	1-2014	Headache	7.42655	2. Highland Epidemic		2. 6 - 15 years
KSI1310429	Kisii DH	10/24/2013	KISII	Female	Kisii	No		Yes	2		1	No			Fever	2	19	39.2	88	Malaria		4360					Highland Epidemic	7	6 - 15 years	Mutant	Wild type	Mutant	2013-10-24	2013	4	1	1	4-2013	Fever	8.38023	2. Highland Epidemic	MDR184	2. 6 - 15 years
KCH1302198	Kericho DH	2/25/2013	Kericho	Female	Kericho	Yes	2-4 weeks	Yes				Yes	Other	Pharmacist	Fever	6	16	41.4	108	Malaria		4120					Highland Epidemic	4	0 - 5 years	Wild type	Wild type	Wild type	2013-02-25	2013	1	0	0	2-2013	Fever	8.32361	2. Highland Epidemic		1. 0 - 5 years
KCH1107152	Kericho DH	7/27/2011	Kericho	Male	Kericho	No		No				No			Headache	1	21	36	86	Malaria							Highland Epidemic	8	6 - 15 years	Wild type	undetermined	undetermined	2011-07-27	2011	3	0	0	3-2011	Headache		2. Highland Epidemic		2. 6 - 15 years
KSI1404528	Kisii DH	4/3/2014	KISII	Male	Kisii	No		Yes	1		1	No			Fever	2	25	38.9	78	Malaria		5080					Highland Epidemic	10	6 - 15 years	Wild type	Wild type	Wild type	2014-04-03	2014	2	0	0	2-2014	Fever	8.53307	2. Highland Epidemic		2. 6 - 15 years
KCH1205170	Kericho DH	5/14/2012	Kericho	Female	Kericho	Yes	2-4 weeks	No				No			Headache	1	55	37.4	86	Malaria							Highland Epidemic	21	Above 15 years	undetermined	undetermined	Wild type	2012-05-14	2012	2	0	2	2-2012	Headache		2. Highland Epidemic		3. Above 15 years
KSI1405551	Kisii DH	5/12/2014	KISII	Female	Kisii																						Highland Epidemic	5	0 - 5 years	Wild type	Wild type	Mutant	2014-05-12	2014	2	1	0	2-2014			2. Highland Epidemic	MDR184	1. 0 - 5 years
KCH1008128	Kericho DH	8/31/2010	Kericho	Female	Kericho	Yes	2-4 weeks	Yes		1	1	No			Fever	3	11.5	39.6	100	Malaria		600					Highland Epidemic	2	0 - 5 years	Mutant	Wild type	Wild type	2010-08-31	2010	3	1	1	3-2010	Fever	6.39693	2. Highland Epidemic	CRT76	1. 0 - 5 years
KCH1008126	Kericho DH	8/17/2010	Kericho	Male	Kericho	Yes	<2weeks	No				No			Headache	7	30	39.6	88	Malaria		2680					Highland Epidemic	10	6 - 15 years	undetermined	Wild type	Mutant	2010-08-17	2010	3	1	2	3-2010	Headache	7.89357	2. Highland Epidemic	MDR184	2. 6 - 15 years
KSI1208277	Kisii DH	8/13/2012	Kisii	Male	Kisii	Yes	2-4 weeks	Yes	2		1	No			Fever	1	64	39.7	74	Malaria		5440					Highland Epidemic	21	Above 15 years	undetermined	Wild type	Mutant	2012-08-13	2012	3	1	2	2-2013	Fever	8.60153	2. Highland Epidemic	MDR184	3. Above 15 years
KCH0805013	Kericho DH	5/20/2008	Kericho	Male	Kericho	Yes	2-4 weeks	No				No					14	38.5	90	Malaria							Highland Epidemic	3	0 - 5 years	Mutant	Mutant	Wild type	2008-05-20	2008	2	1	1	2-2008			2. Highland Epidemic	MDR86	1. 0 - 5 years
KSI1403513	Kisii DH	3/17/2014	KISII	Female	Kisii	No		Yes		3	2	No			Fever	3	13	36.2	70			261000					Highland Epidemic	3	0 - 5 years	Wild type	Wild type	Wild type	2014-03-17	2014	1	0	0	1-2014	Fever	12.4723	2. Highland Epidemic		1. 0 - 5 years
KCH1406262	Kericho DH	6/30/2014	Kericho	Female	Kericho	No		No				No			Headache	2	16	38	97	Malaria		2120					Highland Epidemic	4	0 - 5 years	Wild type	Wild type	Wild type	2014-06-30	2014	2	0	0	2-2014	Headache	7.65917	2. Highland Epidemic		1. 0 - 5 years
KCH0901051	Kericho DH	1/7/2009	Kericho	Male	Kericho	Yes	<2weeks	Yes			2	Yes	Other	Hospital/Dispensary	Fever	1	15	38.6	102	Malaria		360			80		Highland Epidemic	3	0 - 5 years	wild type/Mutant	undetermined	undetermined	2009-01-07	2009	1	0	0	1-2009	Fever	5.8861	2. Highland Epidemic		1. 0 - 5 years
KCH1405256	Kericho DH	5/14/2014	Kericho	Female	Kericho	No		No				No			Coughing	3	15.3	37.1	101	Clinical Malaria							Highland Epidemic	3	0 - 5 years	Wild type	Wild type	wild type/Mutant	2014-05-14	2014	2	0	0	2-2014	Coughing		2. Highland Epidemic		1. 0 - 5 years
KCH1405255	Kericho DH	5/12/2014	Kericho	Female	Kericho	Yes	<2weeks	No				No			Dizziness	2	64	37.4	90	Malaria		720					Highland Epidemic	2	0 - 5 years	Wild type	Wild type	Mutant	2014-05-12	2014	2	1	0	2-2014	Others	6.57925	2. Highland Epidemic	MDR184	1. 0 - 5 years
KSI1111216	Kisii DH	11/16/2011	Kisii	Female	Kisii	No		Yes		3	4	No			Joint Pains	2	48	36.8	64	Malaria		33750					Highland Epidemic	30	Above 15 years	Mutant	wild type/Mutant	wild type/Mutant	2011-11-16	2011	4	1	1	4-2011	Joint Pains	10.4267	2. Highland Epidemic	CRT76	3. Above 15 years
KSI1402490	Kisii DH	2/17/2014	KISII	Male	Kisii	No		Yes		6	2	No			Fever	2	15	37.6	80	Malaria		7040					Highland Epidemic	4	0 - 5 years	Mutant	Wild type	Mutant	2014-02-17	2014	1	1	1	1-2014	Fever	8.85936	2. Highland Epidemic	MDR184	1. 0 - 5 years
KCH1003094	Kericho DH	3/10/2010	Kericho	Female	Kericho	Yes	<2weeks	No				No			Fever	1	11	38.8	105			1400					Highland Epidemic	1	0 - 5 years	Wild type	Wild type	Mutant	2010-03-10	2010	1	1	0	1-2010	Fever	7.24423	2. Highland Epidemic	MDR184	1. 0 - 5 years
KCH1310230	Kericho DH	10/31/2013	Kericho	Female	Kericho	No		No				No			Headache	3	80	37.4	86	Malaria							Highland Epidemic	32	Above 15 years	Wild type	Mutant	wild type/Mutant	2013-10-31	2013	4	1	0	4-2013	Headache		2. Highland Epidemic	MDR86	3. Above 15 years
KCH1405254	Kericho DH	5/12/2014	Kericho	Male	Kericho	Yes	<2weeks	Yes	1		1	No			Dizziness	2	19	39.6	100	Malaria		23040					Highland Epidemic	5	0 - 5 years	Wild type	Wild type	wild type/Mutant	2014-05-12	2014	2	0	0	2-2014	Others	10.045	2. Highland Epidemic		1. 0 - 5 years
KSI1205263	Kisii DH	5/3/2012	Kisii	Female	Kisii	Yes	2-4 weeks	Yes		7	2	No			Headache	2	20	36.1	64	Malaria		1480					Highland Epidemic	6	6 - 15 years	Wild type	Wild type	Mutant	2012-05-03	2012	2	1	0	2-2012	Headache	7.2998	2. Highland Epidemic	MDR184	2. 6 - 15 years
KCH1001074	Kericho DH	1/7/2010	Kericho	Female	Kericho	Yes	<2weeks	Yes		3	3	No			Fever	1	20	37.8	86	Malaria		3240					Highland Epidemic	5	0 - 5 years	Mutant	Wild type	undetermined	2010-01-07	2010	1	1	1	1-2010	Fever	8.08333	2. Highland Epidemic	CRT76	1. 0 - 5 years
KSI1402478	Kisii DH	2/3/2014	KISII	Male	Kisii	No		Yes	3		1	No			Fever	2	40	38.6	74	Malaria		171000					Highland Epidemic	13	6 - 15 years	wild type/Mutant	Wild type	Mutant	2014-02-03	2014	1	1	0	1-2014	Fever	12.0494	2. Highland Epidemic	MDR184	2. 6 - 15 years
KCH1004103	Kericho DH	4/20/2010	Kericho	Female	Kericho	Yes	<2weeks	No				No			Fever	1	15	38	86	Malaria		1760					Highland Epidemic	4	0 - 5 years	undetermined	Wild type	undetermined	2010-04-20	2010	2	0	2	2-2010	Fever	7.47307	2. Highland Epidemic		1. 0 - 5 years
KSI1402497	Kisii DH	2/26/2014	KISII	Female	Kisii	No		Yes		6	2	No			Fever	3	60	39.4	74	Malaria		14600					Highland Epidemic	2	0 - 5 years	Wild type	Wild type	Wild type	2014-02-26	2014	1	0	0	1-2014	Fever	9.58878	2. Highland Epidemic		1. 0 - 5 years
KCH1403249	Kericho DH	4/27/2014	Kericho	Female	Kericho	Yes	<2weeks	No				No			Headache	3	84	36.8	74	Clinical Malaria		600					Highland Epidemic	40	Above 15 years	Wild type	Wild type	Wild type	2014-04-27	2014	2	0	0	2-2014	Headache	6.39693	2. Highland Epidemic		3. Above 15 years
KSI1406611	Kisii DH	6/30/2014	KISII	Male	Kisii	No		Yes		8	2	No			Fever	2	13	39.4	74	Malaria		1560					Highland Epidemic	3	0 - 5 years	undetermined	Wild type	Mutant	2014-06-30	2014	2	1	2	2-2014	Fever	7.35244	2. Highland Epidemic	MDR184	1. 0 - 5 years
KCH1208182	Kericho DH	8/29/2012	Kericho	Female	Kericho	No		Yes		6	2	No			Joint Pains	3	60	36.8	80	Clinical Malaria							Highland Epidemic	32	Above 15 years	undetermined	undetermined	wild type/Mutant	2012-08-29	2012	3	0	2	2-2013	Joint Pains		2. Highland Epidemic		3. Above 15 years
KCH1208180	Kericho DH	8/27/2012	Kericho	Female	Kericho	No		No				No			Fever	3	48	38.2	82	Malaria							Highland Epidemic	25	Above 15 years	undetermined	Mutant	Mutant	2012-08-27	2012	3	1	2	2-2013	Fever		2. Highland Epidemic	MDR184	3. Above 15 years
KSI1406579	Kisii DH	6/4/2014	KISII	Female	Kisii	No		Yes	2		1	No			Fever	3	17.5	39	72	Malaria		7680					Highland Epidemic	5	0 - 5 years	Wild type	Wild type	Mutant	2014-06-04	2014	2	1	0	2-2014	Fever	8.94637	2. Highland Epidemic	MDR184	1. 0 - 5 years
KCH1403244	Kericho DH	3/5/2014	Kericho	Female	Kericho	No		No				No			Fever	5	19	39.4	89	Malaria							Highland Epidemic	5	0 - 5 years	undetermined	wild type/Mutant	Mutant	2014-03-05	2014	1	1	2	1-2014	Fever		2. Highland Epidemic	MDR184	1. 0 - 5 years
KCH1003090	Kericho DH	3/1/2010	Kericho	Female	Kericho	No		No				No			Headache	3	36	36.2	86	Malaria		2920					Highland Epidemic	12	6 - 15 years	Wild type	Mutant	Wild type	2010-03-01	2010	1	1	0	1-2010	Headache	7.97934	2. Highland Epidemic	MDR86	2. 6 - 15 years
KSI1202238	Kisii DH	2/16/2012	Kisii	Male	Kisii	No		Yes		4	2	No			Fever	2	13	38.4	68	Malaria		36000					Highland Epidemic	4	0 - 5 years	wild type/Mutant	Wild type	Wild type	2012-02-16	2012	1	0	0	1-2012	Fever	10.4913	2. Highland Epidemic		1. 0 - 5 years
KCH1307216	Kericho DH	7/15/2013	Kericho	Male	Kericho	No		Yes			3	Yes	Quinine	Hospital/Dispensary	Headache	2	18	37.2	99	Malaria		31500					Highland Epidemic	5	0 - 5 years	Wild type	Wild type	Wild type	2013-07-15	2013	3	0	0	3-2013	Headache	10.3577	2. Highland Epidemic		1. 0 - 5 years
KSI1405540	Kisii DH	5/5/2014	KISII	Male	Kisii	No		Yes		1	2	No	Other	Hospital/Dispensary	Fever	2	13	39.1	74	Malaria							Highland Epidemic	2	0 - 5 years	Wild type	Wild type	Wild type	2014-05-05	2014	2	0	0	2-2014	Fever		2. Highland Epidemic		1. 0 - 5 years
KSI1311437	Kisii DH	11/18/2013	KISII	Female	Kisii	No		Yes		8	2	No			Fever	2	15	38.7	78	Malaria		3440					Highland Epidemic	3	0 - 5 years	Wild type	Wild type	Mutant	2013-11-18	2013	4	1	0	4-2013	Fever	8.14323	2. Highland Epidemic	MDR184	1. 0 - 5 years
KCH1005112	Kericho DH	5/13/2010	Kericho	Female	Kericho	Yes	2-4 weeks	No				No			Headache	2	64	37.5	85	Malaria		1320					Highland Epidemic	20	Above 15 years	Mutant	Mutant	Wild type	2010-05-13	2010	2	1	1	2-2010	Headache	7.18539	2. Highland Epidemic	MDR86	3. Above 15 years
KSI1405557	Kisii DH	5/19/2014	KISII	Male	Kisii	No		Yes		1	3	Yes	Other	Hospital/Dispensary	Fever	2	16.5	38.2	74	Malaria		1040					Highland Epidemic	2	0 - 5 years	Wild type	Wild type	Mutant	2014-05-19	2014	2	1	0	2-2014	Fever	6.94698	2. Highland Epidemic	MDR184	1. 0 - 5 years
KCH1107148	Kericho DH	7/18/2011	Kericho	Female	Kericho	No		No				No			Headache	4	62	37.7	85	Malaria		45000					Highland Epidemic	35	Above 15 years	wild type/Mutant	Wild type	Mutant	2011-07-18	2011	3	1	0	3-2011	Headache	10.7144	2. Highland Epidemic	MDR184	3. Above 15 years
KSI0804006	Kisii DH	4/9/2008	KISII	Male	Kisii	Yes	2-4 weeks	Yes		6	1	No			Fever	3	18	37.8	100	Malaria	RTI	10480					Highland Epidemic	4	0 - 5 years	Mutant	Wild type	Mutant	2008-04-09	2008	2	1	1	2-2008	Fever	9.25722	2. Highland Epidemic	MDR184	1. 0 - 5 years
KSI1403522	Kisii DH	3/27/2014	KISII	Female	Kisii	No		No				No			Fever	3	10	38.2	78	Malaria	RTI						Highland Epidemic	1	0 - 5 years	Wild type	undetermined	Wild type	2014-03-27	2014	1	0	0	1-2014	Fever		2. Highland Epidemic		1. 0 - 5 years
KSI1405553	Kisii DH	5/15/2014	KISII	Female	Kisii	Yes	2-4 weeks	Yes	2		1	No			Fever	2	15.5	39.8	74	Malaria		11160					Highland Epidemic	3	0 - 5 years	Wild type	Wild type	Mutant	2014-05-15	2014	2	1	0	2-2014	Fever	9.32009	2. Highland Epidemic	MDR184	1. 0 - 5 years
KSI1405541	Kisii DH	5/6/2014	KISII	Female	Kisii	No		Yes		6	2	No			Fever	2	15	36.7	78	Malaria		11080					Highland Epidemic	2	0 - 5 years	Wild type	Wild type	Mutant	2014-05-06	2014	2	1	0	2-2014	Fever	9.3129	2. Highland Epidemic	MDR184	1. 0 - 5 years
KSI1208275	Kisii DH	8/1/2012	Kisii	Female	Kisii	No		Yes		9	2	Yes	Other	Self		2	18.5	36.2	72	Malaria		1080					Highland Epidemic	5	0 - 5 years	Wild type	Mutant	Wild type	2012-08-01	2012	3	1	0	2-2013		6.98472	2. Highland Epidemic	MDR86	1. 0 - 5 years
KCH1304204	Kericho DH	4/25/2013	Kericho	Male	Kericho	Yes	<2weeks	Yes		1	5	No			Fever	2	19	39	100	Malaria		65250					Highland Epidemic	5	0 - 5 years	Wild type	Wild type	Wild type	2013-04-25	2013	2	0	0	2-2013	Fever	11.086	2. Highland Epidemic		1. 0 - 5 years
KCH1309223	Kericho DH	9/4/2013	Kericho	Female	Kericho	Yes	<2weeks	No				No			Headache	3	40	37	98	Malaria		1960					Highland Epidemic	28	Above 15 years	Wild type	Wild type	wild type/Mutant	2013-09-04	2013	3	0	0	3-2013	Headache	7.5807	2. Highland Epidemic		3. Above 15 years
KCH0809035	Kericho DH	9/2/2009	Kericho	Male	Kericho	Yes	2-4 weeks	Yes	1		2	No			Fever	9	11	40	94	Malaria		3400					Highland Epidemic	2	0 - 5 years	Mutant	Wild type	Mutant	2009-09-02	2009	3	1	1	3-2009	Fever	8.13153	2. Highland Epidemic	MDR184	1. 0 - 5 years
KSI1403501	Kisii DH	3/4/2014	KISII	Female	Kisii	No		Yes		3	2	No			Fever	2	12	39.9	78	Malaria		4360					Highland Epidemic	1	0 - 5 years	Wild type	wild type/Mutant	wild type/Mutant	2014-03-04	2014	1	0	0	1-2014	Fever	8.38023	2. Highland Epidemic		1. 0 - 5 years
KCH1308221	Kericho DH	8/27/2014	Kericho	Female	Kericho	Yes	<2weeks	No				No			Headache	5	70	37.5	97	Malaria	Typhoid	2400					Highland Epidemic	18	Above 15 years	Wild type	Wild type	wild type/Mutant	2014-08-27	2014	3	0	0	3-2014	Headache	7.78322	2. Highland Epidemic		3. Above 15 years
KCH1009131	Kericho DH	9/29/2010	Kericho	Female	Kericho	Yes	1-2 months	Yes		5	2	No			Fever	5	11.9	37.9	98	Malaria		760					Highland Epidemic	3	0 - 5 years	undetermined	Wild type	Wild type	2010-09-29	2010	3	0	2	3-2010	Fever	6.63332	2. Highland Epidemic		1. 0 - 5 years
KSI1208283	Kisii DH	8/22/2012	Kisii	Female	Kisii	No		Yes	1		1	No			Fever	3	21	38.8	88	Malaria		65250					Highland Epidemic	6	6 - 15 years	Wild type	Wild type	Wild type	2012-08-22	2012	3	0	0	2-2013	Fever	11.086	2. Highland Epidemic		2. 6 - 15 years
KCH1105146	Kericho DH	5/30/2011	Kericho	Female	Kericho	No		No				No			Fever	2	14	38.1	96	Malaria							Highland Epidemic	3	0 - 5 years	Wild type	undetermined	undetermined	2011-05-30	2011	2	0	0	2-2013	Fever		2. Highland Epidemic		1. 0 - 5 years
KSI1311444	Kisii DH	11/27/2013	KISII	Male	Kisii	No		Yes	2		1	No			Fever	2	16.5	36.5	84	Malaria		139500					Highland Epidemic	4	0 - 5 years	Wild type	Wild type	Mutant	2013-11-27	2013	4	1	0	4-2013	Fever	11.8458	2. Highland Epidemic	MDR184	1. 0 - 5 years
KCH1004104	Kericho DH	4/22/2010	Kericho	Female	Kericho	Yes	2-4 weeks	No				No			Diarrhea	3	15.5	37.8	90	Malaria		1280					Highland Epidemic	4	0 - 5 years	Mutant	Wild type	Wild type	2010-04-22	2010	2	1	1	2-2010	Others	7.15462	2. Highland Epidemic	CRT76	1. 0 - 5 years
KSI1309409	Kisii DH	10/18/2013	KISII	Female	Kisii	No		Yes		6	2	Yes	Quinine	Hospital/Dispensary	Fever	2	14	40.1	96	Malaria		5440					Highland Epidemic	4	0 - 5 years	Wild type	Wild type	Wild type	2013-10-18	2013	4	0	0	4-2013	Fever	8.60153	2. Highland Epidemic		1. 0 - 5 years
KSI1401476	Kisii DH	1/30/2014	KISII	Female	Kisii	No		Yes		6	2	No			Fever	2	16	38.5	78	Malaria		3960					Highland Epidemic	3	0 - 5 years	Wild type	Wild type	Mutant	2014-01-30	2014	1	1	0	1-2014	Fever	8.284	2. Highland Epidemic	MDR184	1. 0 - 5 years
KSI1402484	Kisii DH	2/12/2014	KISII	Male	Kisii	No		Yes		6	2	No			Fever	2	14	38.7	78	Malaria		5800					Highland Epidemic	4	0 - 5 years	undetermined	wild type/Mutant	wild type/Mutant	2014-02-12	2014	1	0	2	1-2014	Fever	8.66561	2. Highland Epidemic		1. 0 - 5 years
KSI1307383	Kisii DH	7/15/2013	KISII	Male	Kisii	No		Yes	2	0	1	No			Fever	2	225	39.2	96	Malaria		207000					Highland Epidemic	12	6 - 15 years	Wild type	Wild type	Mutant	2013-07-15	2013	3	1	0	3-2013	Fever	12.2405	2. Highland Epidemic	MDR184	2. 6 - 15 years
KSI1112220	Kisii DH	12/1/2011	Kisii	Female	Kisii	No		No				No			Fever	2	55.1	39.2	78	Malaria		65250					Highland Epidemic	16	Above 15 years	Mutant	Wild type	Wild type	2011-12-01	2011	4	1	1	4-2011	Fever	11.086	2. Highland Epidemic	CRT76	3. Above 15 years
KCH1207175	Kericho DH	7/12/2012	Kericho	Male	Kericho	Yes	2-4 weeks	No				No			Headache	4	66	39	82	Malaria							Highland Epidemic	28	Above 15 years	undetermined	Mutant	Mutant	2012-07-12	2012	3	1	2	2-2013	Headache		2. Highland Epidemic	MDR184	3. Above 15 years
KSI1204252	Kisii DH	4/4/2012	Kisii	Male	Kisii	Yes	<2weeks	Yes	4		1	Yes	Fansidar	Pharmacist	Fever	4	90	39.8	78	Malaria		280					Highland Epidemic	37	Above 15 years	undetermined	Wild type	undetermined	2012-04-04	2012	2	0	2	2-2012	Fever	5.63479	2. Highland Epidemic		3. Above 15 years
KSI1202240	Kisii DH	2/22/2012	Kisii	Female	Kisii	No		Yes		8	2	No			Stomachache	2	21	37.6	76	Malaria		49500					Highland Epidemic	8	6 - 15 years	wild type/Mutant	Wild type	Mutant	2012-02-22	2012	1	1	0	1-2012	Others	10.8097	2. Highland Epidemic	MDR184	2. 6 - 15 years
KCH1303199	Kericho DH	3/12/2013	Kericho	Female	Kericho	No		Yes		11	2	Yes	Quinine	Hospital/Dispensary	Fever	7	12	39.2	104	Malaria	Anaemia	1040					Highland Epidemic	2	0 - 5 years	Wild type	Wild type	Wild type	2013-03-12	2013	1	0	0	2-2013	Fever	6.94698	2. Highland Epidemic		1. 0 - 5 years
KCH1307215	Kericho DH	7/9/2013	Kericho	Male	Kericho	No		Yes	1		1	No			Headache	2	46	37.6	117	Malaria		87750					Highland Epidemic	24	Above 15 years	Wild type	Wild type	Wild type	2013-07-09	2013	3	0	0	3-2013	Headache	11.3822	2. Highland Epidemic		3. Above 15 years
KCH1307214	Kericho DH	7/4/2013	Kericho	Female	Kericho	No		Yes	3		0	No			Fever	2	15	38.7	96	Malaria		58500					Highland Epidemic	6	6 - 15 years	Wild type	Wild type	wild type/Mutant	2013-07-04	2013	3	0	0	3-2013	Fever	10.9768	2. Highland Epidemic		2. 6 - 15 years
KSI1306366	Kisii DH	6/24/2013	Kisii	Male	Kisii	No		Yes	2		1	No			Fever	2	55	39.4	98	Malaria		1160					Highland Epidemic	20	Above 15 years	Wild type	wild type/Mutant	Mutant	2013-06-24	2013	2	1	0	2-2013	Fever	7.05618	2. Highland Epidemic	MDR184	3. Above 15 years
KSI1407618	Kisii DH	7/22/2014	KISII	Male	Kisii	No		Yes		3	2	No			Fever	2	13	39	78	Malaria		177750					Highland Epidemic	3	0 - 5 years	Wild type	Wild type	Wild type	2014-07-22	2014	3	0	0	3-2014	Fever	12.0881	2. Highland Epidemic		1. 0 - 5 years
KSI1402482	Kisii DH	2/11/2014	KISII	Female	Kisii	No		Yes		6		No			Fever	2	13	39.1	84	Malaria							Highland Epidemic	2	0 - 5 years	Wild type	wild type/Mutant	wild type/Mutant	2014-02-11	2014	1	0	0	1-2014	Fever		2. Highland Epidemic		1. 0 - 5 years
KCH0809037	Kericho DH	9/2/2008	Kericho	Female	Kericho	Yes	2-4 weeks	No				No			Headache	1	52	36.7	72	Malaria		2120					Highland Epidemic	20	Above 15 years	undetermined	Wild type	Mutant	2008-09-02	2008	3	1	2	3-2008	Headache	7.65917	2. Highland Epidemic	MDR184	3. Above 15 years
KSI1204257	Kisii DH	4/17/2012	Kisii	Female	Kisii	No		Yes		4	3	Yes	Other	Self	Fever	4	16	40.4	74	Malaria		126000					Highland Epidemic	4	0 - 5 years	wild type/Mutant	Wild type	Wild type	2012-04-17	2012	2	0	0	2-2012	Fever	11.744	2. Highland Epidemic		1. 0 - 5 years
KSI1311439	Kisii DH	11/19/2013	KISII	Female	Kisii	No		Yes	2		1	No			Headache	3	25	36.3	75	Malaria		5800					Highland Epidemic	10	6 - 15 years	Wild type	Wild type	Wild type	2013-11-19	2013	4	0	0	4-2013	Headache	8.66561	2. Highland Epidemic		2. 6 - 15 years
KCH0807028	Kericho DH	8/9/2008	Kericho	Female	Kericho	Yes	2-4 weeks	Yes	3		1	No			Fever	7	17	38.5	92	Clinical Malaria		480					Highland Epidemic	5	0 - 5 years	undetermined	Mutant	Wild type	2008-08-09	2008	3	1	2	3-2008	Fever	6.17379	2. Highland Epidemic	MDR86	1. 0 - 5 years
KSI0804008	Kisii DH	4/15/2008	KISII	Male	Kisii	No		No				No			Fever	2	9.5	40	112	Malaria		6400					Highland Epidemic	0	0 - 5 years	Mutant	Wild type	Mutant	2008-04-15	2008	2	1	1	2-2008	Fever	8.76405	2. Highland Epidemic	MDR184	1. 0 - 5 years
KSI1406599	Kisii DH	6/19/2014	KISII	Female	Kisii	Yes	2-4 weeks	Yes		8	2	No			Fever	3	21.5	38.7	76	Malaria		760					Highland Epidemic	5	0 - 5 years	Wild type	Wild type	Mutant	2014-06-19	2014	2	1	0	2-2014	Fever	6.63332	2. Highland Epidemic	MDR184	1. 0 - 5 years
KCH1401236	Kericho DH	1/13/2014	Kericho	Female	Kericho	Yes	<2weeks	No				No			Fever	3	15	39.2	110	Malaria		1800					Highland Epidemic	2	0 - 5 years	Mutant	Wild type	Mutant	2014-01-13	2014	1	1	1	1-2014	Fever	7.49554	2. Highland Epidemic	MDR184	1. 0 - 5 years
KSI1203246	Kisii DH	2/13/2012	Kisii	Female	Kisii	Yes	2-4 weeks	Yes		6	2	No			Fever	2	10	38	80	Malaria		9720	4680				Highland Epidemic	2	0 - 5 years	Wild type	Wild type	Wild type	2012-02-13	2012	1	0	0	1-2012	Fever	9.18194	2. Highland Epidemic		1. 0 - 5 years
KCH1005110	Kericho DH	5/10/2010	Kericho	Male	Kericho	Yes	<2weeks	No				No			Fever	1	18.5	39.2	88	Malaria		960					Highland Epidemic	5	0 - 5 years	Wild type	Wild type	Mutant	2010-05-10	2010	2	1	0	2-2010	Fever	6.86693	2. Highland Epidemic	MDR184	1. 0 - 5 years
KSI1401470	Kisii DH	1/27/2014	KISII	Male	Kisii	No		Yes		6	2	No			Fever	2	1.5	39.1	88	Malaria		15840					Highland Epidemic	1	0 - 5 years	Wild type	Wild type	Mutant	2014-01-27	2014	1	1	0	1-2014	Fever	9.67029	2. Highland Epidemic	MDR184	1. 0 - 5 years
KCH0902056	Kericho DH	2/16/2009	Kericho	Female	Kericho	No		No				No			Headache	3	47	35.3	84	Malaria		480			120		Highland Epidemic	30	Above 15 years	Mutant	Mutant	undetermined	2009-02-16	2009	1	1	1	1-2009	Headache	6.17379	2. Highland Epidemic	MDR86	3. Above 15 years
KCH1304203	Kericho DH	4/23/2013	Kericho	Female	Kericho	Yes	2-4 weeks	No				No			Headache	7	57	37.7	92	Malaria		33750					Highland Epidemic	42	Above 15 years	Wild type	Wild type	Mutant	2013-04-23	2013	2	1	0	2-2013	Headache	10.4267	2. Highland Epidemic	MDR184	3. Above 15 years
KSI1405562	Kisii DH	5/21/2014	KISII	Female	Kisii	No		Yes		2	3	No			Fever	3	10	40.2	70	Malaria		10720					Highland Epidemic	2	0 - 5 years	Wild type	Wild type	Wild type	2014-05-21	2014	2	0	0	2-2014	Fever	9.27987	2. Highland Epidemic		1. 0 - 5 years
KCH1001075	Kericho DH	1/8/2010	Kericho	Male	Kericho	Yes	2-4 weeks	No				No			Fever	2	21	39.5	90	Malaria		1560					Highland Epidemic	4	0 - 5 years	wild type/Mutant	Mutant	Wild type	2010-01-08	2010	1	1	0	1-2010	Fever	7.35244	2. Highland Epidemic	MDR86	1. 0 - 5 years
KCH1305205	Kericho DH	5/7/2013	Kericho	Female	Kericho	Yes	<2weeks	No				No			Joint Pains	2	59	38.2	88	Malaria		1040					Highland Epidemic	43	Above 15 years	Mutant	Wild type	Mutant	2013-05-07	2013	2	1	1	2-2013	Joint Pains	6.94698	2. Highland Epidemic	MDR184	3. Above 15 years
KCH1307217	Kericho DH	7/22/2013	Kericho	Female	Kericho	Yes	2-4 weeks	Yes			1	Yes	Other	Hospital/Dispensary	Headache	4	52.5	37	80	Malaria		128250					Highland Epidemic	19	Above 15 years	Wild type	Wild type	wild type/Mutant	2013-07-22	2013	3	0	0	3-2013	Headache	11.7617	2. Highland Epidemic		3. Above 15 years
KSI0809001	Kisii DH	9/3/2008	KISII	Male	Kisii	Yes	2-4 weeks	Yes			2	Yes	Fansidar	Hospital/Dispensary	Headache	2	37	36.8	100	Malaria		5840					Highland Epidemic	13	6 - 15 years	Mutant	Mutant	Wild type	2008-09-03	2008	3	1	1	3-2008	Headache	8.67249	2. Highland Epidemic	MDR86	2. 6 - 15 years
KCH0812050	Kericho DH	12/4/2008	Kericho	Female	Kericho	Yes	<2weeks	Yes	4		1	No			Headache	3	54	36.8	74	Malaria		5800					Highland Epidemic	30	Above 15 years	wild type/Mutant	Wild type	Mutant	2008-12-04	2008	4	1	0	4-2008	Headache	8.66561	2. Highland Epidemic	MDR184	3. Above 15 years
KCH1407268	Kericho DH	7/31/2014	Kericho	Female	Kericho	No		Yes		8	1	No			Fever	5	20	38.3	105	Malaria		33400					Highland Epidemic	5	0 - 5 years	Wild type	Wild type	Wild type	2014-07-31	2014	3	0	0	3-2014	Fever	10.4163	2. Highland Epidemic		1. 0 - 5 years
KSI1402494	Kisii DH	2/24/2014	KISII	Male	Kisii	No		Yes	2		1	No			Headache	3	16	38.6	72	Malaria		640					Highland Epidemic	5	0 - 5 years	Wild type	Wild type	Wild type	2014-02-24	2014	1	0	0	1-2014	Headache	6.46147	2. Highland Epidemic		1. 0 - 5 years
KSI1407616	Kisii DH	7/14/2014	KISII	Male	Kisii	No		No				No			Fever	2	14.2	39.1	76	Malaria		15920					Highland Epidemic	6	6 - 15 years	Wild type	Wild type	Mutant	2014-07-14	2014	3	1	0	3-2014	Fever	9.67533	2. Highland Epidemic	MDR184	2. 6 - 15 years
KCH1309225	Kericho DH	9/9/2013	Kericho	Male	Kericho	Yes	2-4 weeks	Yes		3	1	No			Joint Pains	3	74	38.3	75	Malaria		1120					Highland Epidemic	30	Above 15 years	Wild type	Wild type	Mutant	2013-09-09	2013	3	1	0	3-2013	Joint Pains	7.02108	2. Highland Epidemic	MDR184	3. Above 15 years
KSI1406589	Kisii DH	6/12/2014	KISII	Male	Kisii	No		Yes	2		1	No			Fever	3	22	38.9	68	Malaria		175500					Highland Epidemic	9	6 - 15 years	Wild type	Wild type	Wild type	2014-06-12	2014	2	0	0	2-2014	Fever	12.0754	2. Highland Epidemic		2. 6 - 15 years
KCH1104142	Kericho DH	4/27/2011	Kericho	Male	Kericho	No		Yes	1		1	No			Fever	2	16	38.7	100	Malaria		3120					Highland Epidemic	3	0 - 5 years	Wild type	Wild type	Wild type	2011-04-27	2011	2	0	0	2-2013	Fever	8.04559	2. Highland Epidemic		1. 0 - 5 years
KSI1406606	Kisii DH	6/26/2014	KISII	Female	Kisii	No		Yes		4	2	No			Fever	2	11.5	39.8	78	Malaria		80000					Highland Epidemic	0	0 - 5 years	Wild type	Wild type	Wild type	2014-06-26	2014	2	0	0	2-2014	Fever	11.2898	2. Highland Epidemic		1. 0 - 5 years
KCH0804006	Kericho DH	4/16/2008	BURETI	Female	Kericho	Yes	<2weeks	No				No			Headache	3	59	37	86	Malaria	Anaemia	139500					Highland Epidemic	21	Above 15 years	Mutant	Mutant	Wild type	2008-04-16	2008	2	1	1	2-2008	Headache	11.8458	2. Highland Epidemic	MDR86	3. Above 15 years
KCH1310228	Kericho DH	10/15/2013	Kericho	Female	Kericho	Yes	<2weeks	No				No			Headache	1	52	38.1	95	Malaria							Highland Epidemic	24	Above 15 years	Wild type	Mutant	wild type/Mutant	2013-10-15	2013	4	1	0	4-2013	Headache		2. Highland Epidemic	MDR86	3. Above 15 years
KSI1201230	Kisii DH	1/20/2012	Kisii	Male	Kisii	No		Yes		6	2	No			Fever	2	13	38.5	85	Malaria		1480					Highland Epidemic	3	0 - 5 years	Mutant	Wild type	wild type/Mutant	2012-01-20	2012	1	1	1	1-2012	Fever	7.2998	2. Highland Epidemic	CRT76	1. 0 - 5 years
KCH1109154	Kericho DH	9/27/2011	Kericho	Female	Kericho	No		Yes	1		1	No			Dizziness	2	55	36.8	88	Malaria	Anaemia						Highland Epidemic	32	Above 15 years	Wild type	undetermined	undetermined	2011-09-27	2011	3	0	0	3-2011	Others		2. Highland Epidemic		3. Above 15 years
KSI1311440	Kisii DH	11/20/2013	KISII	Male	Kisii	No		Yes		5	2	No			Fever	2	11	39.6	78	Malaria		11280					Highland Epidemic	1	0 - 5 years	Wild type	Wild type	Mutant	2013-11-20	2013	4	1	0	4-2013	Fever	9.33079	2. Highland Epidemic	MDR184	1. 0 - 5 years
KCH1005115	Kericho DH	5/24/2010	Kericho	Male	Kericho	No		No				No			Vomiting	4	61	38.2	115	Malaria		288000					Highland Epidemic	28	Above 15 years	wild type/Mutant	Wild type	wild type/Mutant	2010-05-24	2010	2	0	0	2-2010	Others	12.5707	2. Highland Epidemic		3. Above 15 years
KCH1109155	Kericho DH	9/29/2011	Kericho	Female	Kericho	No		No				No			Headache	2	36	38.9	94	Malaria		240					Highland Epidemic	13	6 - 15 years	wild type/Mutant	undetermined	Mutant	2011-09-29	2011	3	1	0	3-2011	Headache	5.48064	2. Highland Epidemic	MDR184	2. 6 - 15 years
KCH0907066	Kericho DH	7/30/2009	Kericho	Male	Kericho	No		No				No			Headache	1	17	38.2	94	Malaria		2920					Highland Epidemic	5	0 - 5 years	wild type/Mutant	Mutant	Wild type	2009-07-30	2009	3	1	0	3-2009	Headache	7.97934	2. Highland Epidemic	MDR86	1. 0 - 5 years
KSI1201224	Kisii DH	1/16/2012	Kisii	Male	Kisii	No		Yes		2	2	No			Fever	3	20.7	38.7	72	Malaria		920					Highland Epidemic	5	0 - 5 years	Wild type	Wild type	Mutant	2012-01-16	2012	1	1	0	1-2012	Fever	6.82437	2. Highland Epidemic	MDR184	1. 0 - 5 years
KCH1004106	Kericho DH	4/28/2010	Kericho	Female	Kericho	Yes	<2weeks	Yes		1	3	Yes	Other	Hospital/Dispensary	Fever	3	13	40	90	Malaria		1160					Highland Epidemic			Mutant	Mutant	Wild type	2010-04-28	2010	2	1	1	2-2010	Fever	7.05618	2. Highland Epidemic	MDR86
KSI1203248	Kisii DH	3/19/2012	Kisii	Male	Kisii	No		Yes	2		1	No			Backache	4	56	37.1	68	Malaria		1200					Highland Epidemic	58	Above 15 years	Mutant	Wild type	Mutant	2012-03-19	2012	1	1	1	1-2012	Others	7.09008	2. Highland Epidemic	MDR184	3. Above 15 years
KSI1403503	Kisii DH	3/10/2014	KISII	Male	Kisii	No		Yes	1		1	No			Fever	2	14.5	38.4	74	Malaria		144000					Highland Epidemic	3	0 - 5 years	Wild type	Wild type	Mutant	2014-03-10	2014	1	1	0	1-2014	Fever	11.8776	2. Highland Epidemic	MDR184	1. 0 - 5 years
KSI1402488	Kisii DH	2/17/2014	KISII	Male	Kisii	No		Yes	2		1	No			Fever	2	17	40	78	Malaria		13960					Highland Epidemic	5	0 - 5 years	Wild type	Wild type	Wild type	2014-02-17	2014	1	0	0	1-2014	Fever	9.54395	2. Highland Epidemic		1. 0 - 5 years
KCH1005114	Kericho DH	5/17/2010	Kericho	Female	Kericho	Yes	2-4 weeks	No				No			Headache	3	74	38	77	Malaria		69750					Highland Epidemic	25	Above 15 years	Mutant	Wild type	undetermined	2010-05-17	2010	2	1	1	2-2010	Headache	11.1527	2. Highland Epidemic	CRT76	3. Above 15 years
KSI1401461	Kisii DH	1/16/2014	KISII	Male	Kisii	No		Yes		8	2	No			Fever	2	20	38.1	78	Malaria		8640					Highland Epidemic	3	0 - 5 years	wild type/Mutant	Wild type	Wild type	2014-01-16	2014	1	0	0	1-2014	Fever	9.06416	2. Highland Epidemic		1. 0 - 5 years
KSI1405545	Kisii DH	5/6/2011	KISII	Male	Kisii	No		Yes	3		1	No			Fever	2	31	38.8	80	Malaria		380250					Highland Epidemic	13	6 - 15 years	Wild type	Wild type	Mutant	2011-05-06	2011	2	1	0	2-2013	Fever	12.8486	2. Highland Epidemic	MDR184	2. 6 - 15 years
KSI1111219	Kisii DH	11/29/2011	Kisii	Male	Kisii	Yes	<2weeks	Yes		3	2	No			Fever	6	12	40.1	78	Malaria		119250					Highland Epidemic	2	0 - 5 years	Wild type	undetermined	Mutant	2011-11-29	2011	4	1	0	4-2011	Fever	11.689	2. Highland Epidemic	MDR184	1. 0 - 5 years
KCH1003097	Kericho DH	3/22/2010	Kericho	Male	Kericho	No		No				No			Headache	3	58		86	Malaria		4680					Highland Epidemic	27	Above 15 years	Mutant	Wild type	Mutant	2010-03-22	2010	1	1	1	1-2010	Headache	8.45105	2. Highland Epidemic	MDR184	3. Above 15 years
KSI1401475	Kisii DH	1/30/2014	KISII	Female	Kisii	No		Yes		5		No			Fever	2	16	38.5	88	Malaria		760					Highland Epidemic	5	0 - 5 years	Wild type	Wild type	Mutant	2014-01-30	2014	1	1	0	1-2014	Fever	6.63332	2. Highland Epidemic	MDR184	1. 0 - 5 years
KCH1404253	Kericho DH	4/29/2014	Kericho	Female	Kericho	Yes	<2weeks	Yes		5	3	No			Headache	5	57	37	90	Malaria							Highland Epidemic	26	Above 15 years	Wild type	Wild type	wild type/Mutant	2014-04-29	2014	2	0	0	2-2014	Headache		2. Highland Epidemic		3. Above 15 years
KSI1204254	Kisii DH	4/10/2012	Gucha	Female	Kisii	No		Yes		1	2	Yes	Other	Hospital/Dispensary	Fever	3	70	39.4	74	Malaria		3360					Highland Epidemic	18	Above 15 years	undetermined	wild type/Mutant	undetermined	2012-04-10	2012	2	0	2	2-2012	Fever	8.1197	2. Highland Epidemic		3. Above 15 years
KSI1406598	Kisii DH	6/19/2014	KISII	Female	Kisii	No		Yes	1		1	No			Fever	2	17	38.6	80	Malaria		173250					Highland Epidemic	5	0 - 5 years	Wild type	Wild type	Wild type	2014-06-19	2014	2	0	0	2-2014	Fever	12.0625	2. Highland Epidemic		1. 0 - 5 years
KSI1403521	Kisii DH	3/27/2014	KISII	Male	Kisii	No		Yes	3		1	No			Fever	2	27	38.2	72	Malaria		216000					Highland Epidemic	10	6 - 15 years	Wild type	Wild type	Mutant	2014-03-27	2014	1	1	0	1-2014	Fever	12.283	2. Highland Epidemic	MDR184	2. 6 - 15 years
KSI1109202	Kisii DH	9/8/2011	Kisii	Male	Kisii	No		Yes	2		1	No			Headache	2	29.1	37.2	70	Malaria		54000					Highland Epidemic	12	6 - 15 years	Mutant	wild type/Mutant	Wild type	2011-09-08	2011	3	1	1	3-2011	Headache	10.8967	2. Highland Epidemic	CRT76	2. 6 - 15 years
KDH1202816	Kisumu DH	2/28/2012	Kisumu	Female	Kisumu	Yes	1-2 months	Yes	2			No			Headache	3	47	36.4	80	Malaria		589500					Lake Endemic	17	Above 15 years	Wild type	Wild type	wild type/Mutant	2012-02-28	2012	1	0	0	1-2012	Headache	13.287	3. Lake Endemic		3. Above 15 years
KOM1405244	Kombewa DH	5/22/2014	Kisumu	Male	Kisumu	No		Yes			4	Yes	Other	Hospital/Dispensary	Fever	2	12	37.4	97	Malaria		399240					Lake Endemic	3	0 - 5 years	Wild type	Wild type	Mutant	2014-05-22	2014	2	1	0	2-2014	Fever	12.8973	3. Lake Endemic	MDR184	1. 0 - 5 years
KDH0809110	Kisumu DH	9/2/2009	Kisumu	Male	Kisumu	Yes	2-4 weeks	Yes	10		0	No			Headache	3	73	35.9	73	Malaria		72000					Lake Endemic	21	Above 15 years	wild type/Mutant	wild type/Mutant	wild type/Mutant	2009-09-02	2009	3	0	0	3-2009	Headache	11.1844	3. Lake Endemic		3. Above 15 years
KDH0903197	Kisumu DH	3/31/2009	Kisumu	Female	Kisumu	No		Yes	3			No			Dizziness	3	53	35.1	61	Malaria		360000					Lake Endemic	40	Above 15 years	Wild type	Mutant	Wild type	2009-03-31	2009	1	1	0	1-2009	Others	12.7939	3. Lake Endemic	MDR86	3. Above 15 years
KOM1403180	Kombewa DH	3/10/2014	Kisumu	Female	Kisumu	No		Yes		2	4	No			Fever	3	30	38.5	123	Malaria		14080					Lake Endemic	8	6 - 15 years	Wild type	Wild type	wild type/Mutant	2014-03-10	2014	1	0	0	1-2014	Fever	9.55251	3. Lake Endemic		2. 6 - 15 years
KDH1202802	Kisumu DH	2/6/2012	Kisumu	Female	Kisumu	Yes	1-2 months	No				No			Vomiting	2	11	37.9	136	Malaria		283500					Lake Endemic	0	0 - 5 years	Mutant	Mutant	wild type/Mutant	2012-02-06	2012	1	1	1	1-2012	Others	12.555	3. Lake Endemic	MDR86	1. 0 - 5 years
KDH14041377	Kisumu DH	4/22/2014	Kisumu	Female	Kisumu	No		Yes		4	1	No			Fever	1	16	39	130	Malaria		47250					Lake Endemic	4	0 - 5 years	wild type/Mutant	Wild type	wild type/Mutant	2014-04-22	2014	2	0	0	2-2014	Fever	10.7632	3. Lake Endemic		1. 0 - 5 years
KDH1105632	Kisumu DH	5/16/2011	Kisumu	Female	Kisumu	Yes	<2weeks	Yes	1			No			Fever	1	15.3	35.9	120	Malaria		225000					Lake Endemic	3	0 - 5 years	wild type/Mutant	wild type/Mutant	undetermined	2011-05-16	2011	2	0	0	2-2013	Fever	12.3239	3. Lake Endemic		1. 0 - 5 years
KDH1001341	Kisumu DH	1/27/2010	Kisumu	Male	Kisumu	No		Yes		2	2	No			Stomachache	3	15	38.7	152	Malaria		11250					Lake Endemic	3	0 - 5 years	wild type/Mutant	Wild type	Wild type	2010-01-27	2010	1	0	0	1-2010	Others	9.32812	3. Lake Endemic		1. 0 - 5 years
KDH1004400	Kisumu DH	4/19/2010	Kisumu	Female	Kisumu	Yes	2-4 weeks	No				No			Headache	2	70	38.1	95	Malaria		42750					Lake Endemic	27	Above 15 years	Mutant	Wild type	Wild type	2010-04-19	2010	2	1	1	2-2010	Headache	10.6631	3. Lake Endemic	CRT76	3. Above 15 years
KOM1311109	Kombewa DH	11/18/2013	Kisumu	Male	Kisumu	No		Yes		2	5	No			Fever	2	15	37.4	113	Malaria		99200					Lake Endemic	5	0 - 5 years	Wild type	wild type/Mutant	wild type/Mutant	2013-11-18	2013	4	0	0	4-2013	Fever	11.5049	3. Lake Endemic		1. 0 - 5 years
KOM1404221	Kombewa DH	4/29/2014	Kisumu	Male	Kisumu	No		Yes		1	3	Yes	Other	Pharmacist	Fever	2	11	37.2	97	Malaria		10560					Lake Endemic	1	0 - 5 years	Wild type	Wild type	Wild type	2014-04-29	2014	2	0	0	2-2014	Fever	9.26483	3. Lake Endemic		1. 0 - 5 years
KDH0805050	Kisumu DH	5/26/2008	Kisumu	Male	Kisumu	No		Yes	4			No			Fever	4	18	36.6	92	Malaria		182250					Lake Endemic	5	0 - 5 years	wild type/Mutant	wild type/Mutant	Wild type	2008-05-26	2008	2	0	0	2-2008	Fever	12.1131	3. Lake Endemic		1. 0 - 5 years
KDH0910268	Kisumu DH	10/8/2009	Kisumu	Male	Kisumu	No		Yes	4			No			Headache	4	57	37.3	80			42750					Lake Endemic	27	Above 15 years	Mutant	Wild type	undetermined	2009-10-08	2009	4	1	1	4-2009	Headache	10.6631	3. Lake Endemic	CRT76	3. Above 15 years
KDH1003378	Kisumu DH	3/18/2010	Kisumu	Female	Kisumu	No		Yes		2	2	No			Fever	2	12.5	38.4	162	Malaria		4500					Lake Endemic	3	0 - 5 years	undetermined	Wild type	undetermined	2010-03-18	2010	1	0	2	1-2010	Fever	8.41183	3. Lake Endemic		1. 0 - 5 years
KDH0911316	Kisumu DH	11/30/2009	Kisumu	Male	Kisumu	No		Yes		5	1	No			Fever	1	13	39.1	136	Malaria		96750					Lake Endemic	3	0 - 5 years	wild type/Mutant	Wild type	undetermined	2009-11-30	2009	4	0	0	4-2009	Fever	11.4799	3. Lake Endemic		1. 0 - 5 years
KDH0907250	Kisumu DH	7/23/2009	Kisumu	Male	Kisumu	No		Yes	4			No			Fever	3	55	39.3	100	Malaria		22500					Lake Endemic	15	6 - 15 years	Mutant	Mutant	Wild type	2009-07-23	2009	3	1	1	3-2009	Fever	10.0213	3. Lake Endemic	MDR86	2. 6 - 15 years
KDH0910273	Kisumu DH	10/15/2009	Kisumu	Female	Kisumu	No		Yes		4	2	No			Fever		19	38.5	94	Malaria		36000					Lake Endemic	5	0 - 5 years	Mutant	Mutant	Wild type	2009-10-15	2009	4	1	1	4-2009	Fever	10.4913	3. Lake Endemic	MDR86	1. 0 - 5 years
KDH0806059	Kisumu DH	6/3/2008	Kisumu	Female	Kisumu	Yes	2-4 weeks	Yes		8	1	No				3	58	37.2	60	Malaria		189000					Lake Endemic	21	Above 15 years	Mutant	Mutant	wild type/Mutant	2008-06-03	2008	2	1	1	2-2008		12.1495	3. Lake Endemic	MDR86	3. Above 15 years
KDH14021339	Kisumu DH	2/25/2014	Kisumu	Female	Kisumu	No		Yes	5		0	No			Headache	2	60	37.6	104	Malaria		15750					Lake Endemic	18	Above 15 years	Wild type	Wild type	Mutant	2014-02-25	2014	1	1	0	1-2014	Headache	9.6646	3. Lake Endemic	MDR184	3. Above 15 years
KDH1110716	Kisumu DH	10/6/2011	Kisumu	Male	Kisumu	No		Yes		6	1	No			Fever	2	11	37.5	110	Malaria		58500					Lake Endemic	3	0 - 5 years	wild type/Mutant	wild type/Mutant	Mutant	2011-10-06	2011	4	1	0	4-2011	Fever	10.9768	3. Lake Endemic	MDR184	1. 0 - 5 years
KDH14021335	Kisumu DH	2/24/2014	Kisumu	Male	Kisumu	Yes	1-2 months	Yes		2	5	No			Fever	2	16.5	38.6	128	Malaria		36000					Lake Endemic	4	0 - 5 years	Wild type	Wild type	Wild type	2014-02-24	2014	1	0	0	1-2014	Fever	10.4913	3. Lake Endemic		1. 0 - 5 years
KDH1103577	Kisumu DH	3/3/2011	Kisumu	Female	Kisumu	Yes	1-2 months	No				No			Fever	9	13.9	39.5	160	Malaria		49500					Lake Endemic	3	0 - 5 years	Wild type	Wild type	wild type/Mutant	2011-03-03	2011	1	0	0	1-2011	Fever	10.8097	3. Lake Endemic		1. 0 - 5 years
KDH0806079	Kisumu DH	6/23/2008	Kisumu	Male	Kisumu	Yes	2-4 weeks	No				No			Fever	7	53	35.6	62	Malaria		2680					Lake Endemic	26	Above 15 years	wild type/Mutant	Mutant	Wild type	2008-06-23	2008	2	1	0	2-2008	Fever	7.89357	3. Lake Endemic	MDR86	3. Above 15 years
KDH1007459	Kisumu DH	7/13/2010	Kisumu	Male	Kisumu	No		Yes		2	3	No			Stomachache	3	37	36.6	100	Malaria		51750					Lake Endemic	11	6 - 15 years	wild type/Mutant	Wild type	Wild type	2010-07-13	2010	3	0	0	3-2010	Others	10.8542	3. Lake Endemic		2. 6 - 15 years
KOM1403186	Kombewa DH	3/13/2014	Kisumu	Male	Kisumu	No		Yes		2	2	No			Fever	2	52	37.3	69	Malaria		29760					Lake Endemic	18	Above 15 years	Wild type	Wild type	Mutant	2014-03-13	2014	1	1	0	1-2014	Fever	10.3009	3. Lake Endemic	MDR184	3. Above 15 years
KDH1111756	Kisumu DH	11/15/2011	Kisumu	Male	Kisumu	No		Yes		6	1	No			Fever	3	13	39.7	156	Malaria		31500					Lake Endemic	2	0 - 5 years	Wild type	wild type/Mutant	Wild type	2011-11-15	2011	4	0	0	4-2011	Fever	10.3577	3. Lake Endemic		1. 0 - 5 years
KDH1201777	Kisumu DH	1/12/2012	Kisumu	Male	Kisumu	No		No				No			Fever	2	16	40.5	180	Malaria		292500					Lake Endemic	4	0 - 5 years	wild type/Mutant	Wild type	Mutant	2012-01-12	2012	1	1	0	1-2012	Fever	12.5862	3. Lake Endemic	MDR184	1. 0 - 5 years
KDH0912319	Kisumu DH	12/1/2009	Kisumu	Female	Kisumu	Yes	<2weeks	Yes		11	1	No			Headache	4	55	36.4	91	Malaria		4500					Lake Endemic	20	Above 15 years	Mutant	undetermined	undetermined	2009-12-01	2009	4	1	1	4-2009	Headache	8.41183	3. Lake Endemic	CRT76	3. Above 15 years
KDH0912320	Kisumu DH	12/2/2009	Kisumu	Male	Kisumu	No		Yes		2		No			Headache	7	20	35.4	140	Malaria		146250					Lake Endemic	7	6 - 15 years	Mutant	Wild type	undetermined	2009-12-02	2009	4	1	1	4-2009	Headache	11.8931	3. Lake Endemic	CRT76	2. 6 - 15 years
KDH14051414	Kisumu DH	5/26/2014	Kisumu	Male	Kisumu	Yes	<2weeks	Yes		2	3	No			Headache	2	72	38.4	108	Malaria		11250					Lake Endemic	42	Above 15 years	Wild type	Wild type	wild type/Mutant	2014-05-26	2014	2	0	0	2-2014	Headache	9.32812	3. Lake Endemic		3. Above 15 years
KDH1207867	Kisumu DH	7/12/2012	Kisumu	Male	Kisumu	No		Yes	1		0	No			Fever	3	12	36	116	Malaria		184500					Lake Endemic	3	0 - 5 years	Mutant	Wild type	Wild type	2012-07-12	2012	3	1	1	2-2013	Fever	12.1254	3. Lake Endemic	CRT76	1. 0 - 5 years
KDH14051410	Kisumu DH	5/20/2014	Kisumu	Female	Kisumu	Yes	<2weeks	Yes	2		0	No			Headache	2	62	34.1	101	Malaria		63000					Lake Endemic	54	Above 15 years	Wild type	Wild type	Wild type	2014-05-20	2014	2	0	0	2-2014	Headache	11.0509	3. Lake Endemic		3. Above 15 years
KDH14021321	Kisumu DH	2/6/2014	Kisumu	Male	Kisumu	No		No				No			Headache	4	55	36.5	76	Malaria		94500					Lake Endemic	21	Above 15 years	Wild type	Wild type	wild type/Mutant	2014-02-06	2014	1	0	0	1-2014	Headache	11.4564	3. Lake Endemic		3. Above 15 years
KDH14061424	Kisumu DH	6/4/2014	Kisumu	Male	Kisumu	Yes	1-2 months	No				No			Fever	4	9.7	36.5	126	Malaria		31500					Lake Endemic	1	0 - 5 years	Mutant	Wild type	Mutant	2014-06-04	2014	2	1	1	2-2014	Fever	10.3577	3. Lake Endemic	MDR184	1. 0 - 5 years
KDH1005424	Kisumu DH	5/19/2010	Kisumu	Female	Kisumu	No		Yes		2	4	No			Vomiting	3	54	35.2	68	Malaria		9000					Lake Endemic	52	Above 15 years	Wild type	Wild type	Mutant	2010-05-19	2010	2	1	0	2-2010	Others	9.10498	3. Lake Endemic	MDR184	3. Above 15 years
KOM1404222	Kombewa DH	4/29/2014	Kisumu	Male	Kisumu	Yes	1-2 months	Yes		2	4	No			Fever	2	17.2	35.4	101	Malaria		188480					Lake Endemic	4	0 - 5 years	Wild type	Wild type	Wild type	2014-04-29	2014	2	0	0	2-2014	Fever	12.1467	3. Lake Endemic		1. 0 - 5 years
KOM1310094	Kombewa DH	10/29/2013	Kisumu	Male	Kisumu	No		Yes		3	4	No			Fever	3	17	38.5	96	Malaria		187200					Lake Endemic	4	0 - 5 years	Wild type	wild type/Mutant	wild type/Mutant	2013-10-29	2013	4	0	0	4-2013	Fever	12.1399	3. Lake Endemic		1. 0 - 5 years
KDH1012536	Kisumu DH	12/8/2010	Kisumu	Female	Kisumu	No		Yes		3	4	No			Fever	7	8.9	38.3	120	Malaria		47250					Lake Endemic	1	0 - 5 years	wild type/Mutant	Wild type	wild type/Mutant	2010-12-08	2010	4	0	0	4-2010	Fever	10.7632	3. Lake Endemic		1. 0 - 5 years
KDH1012537	Kisumu DH	12/10/2010	Kisumu	Female	Kisumu	No		Yes			2	No			Fever	14	19	39.3	110	Malaria		195750					Lake Endemic	6	6 - 15 years	Mutant	Wild type	Mutant	2010-12-10	2010	4	1	1	4-2010	Fever	12.1846	3. Lake Endemic	MDR184	2. 6 - 15 years
KOM1404225	Kombewa DH	4/30/2014	Kisumu	Male	Kisumu	No		Yes		3	2	No			Fever	2	20	37.6	111	Malaria		128800					Lake Endemic	4	0 - 5 years	Wild type	Wild type	Wild type	2014-04-30	2014	2	0	0	2-2014	Fever	11.766	3. Lake Endemic		1. 0 - 5 years
KDH1102576	Kisumu DH	2/28/2011	Kisumu	Female	Kisumu	No		Yes			5	Yes	Quinine	Hospital/Dispensary	Fever	3	15	37.8	160	Malaria		279000					Lake Endemic	3	0 - 5 years	wild type/Mutant	Wild type	Wild type	2011-02-28	2011	1	0	0	1-2011	Fever	12.539	3. Lake Endemic		1. 0 - 5 years
KDH1107656	Kisumu DH	7/6/2011	Kisumu	Male	Kisumu	Yes		No				No			Fever	1	11.5	37.7	164	Malaria		18000					Lake Endemic	2	0 - 5 years	wild type/Mutant	Wild type	undetermined	2011-07-06	2011	3	0	0	3-2011	Fever	9.79813	3. Lake Endemic		1. 0 - 5 years
KDH1005418	Kisumu DH	5/6/2010	Kisumu	Male	Kisumu	Yes	1-2 months	Yes		9	1	No			Fever	3	15	39.7	192	Malaria		445500					Lake Endemic	2	0 - 5 years	wild type/Mutant	Wild type	Mutant	2010-05-06	2010	2	1	0	2-2010	Fever	13.007	3. Lake Endemic	MDR184	1. 0 - 5 years
KOM1404202	Kombewa DH	4/9/2014	Kisumu	Female	Kisumu	Yes	1-2 months	Yes	2		0	No			Headache	4	50	37.1	53	Malaria		1760					Lake Endemic	35	Above 15 years	wild type/Mutant	Wild type	Mutant	2014-04-09	2014	2	1	0	2-2014	Headache	7.47307	3. Lake Endemic	MDR184	3. Above 15 years
KDH1105628	Kisumu DH	5/11/2011	Kisumu	Male	Kisumu	No		Yes		5	3	No			Fever	14	8	39.9	168	Malaria		24750					Lake Endemic	1	0 - 5 years	Wild type	wild type/Mutant	undetermined	2011-05-11	2011	2	0	0	2-2013	Fever	10.1166	3. Lake Endemic		1. 0 - 5 years
KDH14011315	Kisumu DH	1/29/2014	Kisumu	Female	Kisumu	Yes	<2weeks	Yes	1			No			Fever	1	11	39.7	164	Malaria		67500					Lake Endemic	3	0 - 5 years	Wild type	Wild type	Wild type	2014-01-29	2014	1	0	0	1-2014	Fever	11.1199	3. Lake Endemic		1. 0 - 5 years
KDH1208879	Kisumu DH	8/3/2012	Kisumu	Male	Kisumu	Yes	2-4 weeks	Yes		10	1	No			Fever	2	12	39	180	Malaria	RTI	1640					Lake Endemic	2	0 - 5 years	Wild type	Wild type	Mutant	2012-08-03	2012	3	1	0	2-2013	Fever	7.40245	3. Lake Endemic	MDR184	1. 0 - 5 years
KDH1011520	Kisumu DH	11/22/2010	Kisumu	Male	Kisumu	No		Yes		8	5	No			Fever	1	10	38.3	132	Malaria		76500					Lake Endemic	1	0 - 5 years	Wild type	Wild type	Wild type	2010-11-22	2010	4	0	0	4-2010	Fever	11.245	3. Lake Endemic		1. 0 - 5 years
KDH0811152	Kisumu DH	11/19/2008	Kisumu	Female	Kisumu	Yes		Yes	1	2	0	No			Fever	1	10	40.5	173	Malaria		362250					Lake Endemic	1	0 - 5 years	Mutant	Mutant	Wild type	2008-11-19	2008	4	1	1	4-2008	Fever	12.8001	3. Lake Endemic	MDR86	1. 0 - 5 years
KOM1403173	Kombewa DH	3/5/2014	Kisumu	Female	Kisumu	No		Yes		1	6	Yes	Other	Hospital/Dispensary	Fever	1	18	38.5	131	Malaria		113280					Lake Endemic	4	0 - 5 years	Wild type	Wild type	Mutant	2014-03-05	2014	1	1	0	1-2014	Fever	11.6376	3. Lake Endemic	MDR184	1. 0 - 5 years
KDH1001327	Kisumu DH	1/8/2010	Kisumu	Male	Kisumu	No		Yes		72		No			Fever	2	16.7	37.5	144	Malaria		292500					Lake Endemic	4	0 - 5 years	undetermined	Wild type	Mutant	2010-01-08	2010	1	1	2	1-2010	Fever	12.5862	3. Lake Endemic	MDR184	1. 0 - 5 years
KDH1011523	Kisumu DH	11/26/2010	Kisumu	Female	Kisumu	Yes	1-2 months	Yes		8	1	No			Fever	1	15.4	37.8	140	Malaria		58500					Lake Endemic	2	0 - 5 years	Wild type	Mutant	Wild type	2010-11-26	2010	4	1	0	4-2010	Fever	10.9768	3. Lake Endemic	MDR86	1. 0 - 5 years
KDH14051420	Kisumu DH	5/30/2014	Kisumu	Female	Kisumu	No		Yes		5	3	No			Fever	11	85	39	120	Malaria		22500					Lake Endemic	30	Above 15 years	Wild type	Wild type	wild type/Mutant	2014-05-30	2014	2	0	0	2-2014	Fever	10.0213	3. Lake Endemic		3. Above 15 years
KDH1203821	Kisumu DH	3/22/2012	Kisumu	Female	Kisumu	No		Yes	2		0	No			Headache	2	31	39.5	136	Malaria		605250					Lake Endemic	10	6 - 15 years	Mutant	Wild type	Wild type	2012-03-22	2012	1	1	1	1-2012	Headache	13.3134	3. Lake Endemic	CRT76	2. 6 - 15 years
KDH0911305	Kisumu DH	11/24/2009	Kisumu	Female	Kisumu	Yes	2-4 weeks	No				No			Headache	4	40	37.4	114	Malaria		38250					Lake Endemic	56	Above 15 years	wild type/Mutant	Wild type	undetermined	2009-11-24	2009	4	0	0	4-2009	Headache	10.5519	3. Lake Endemic		3. Above 15 years
KDH1012533	Kisumu DH	12/7/2010	Kisumu	Male	Kisumu	No		Yes		5	3	No			Fever	1	19	38.8	144	Malaria		65250					Lake Endemic	5	0 - 5 years	Mutant	Mutant	Mutant	2010-12-07	2010	4	1	1	4-2010	Fever	11.086	3. Lake Endemic	MDR184	1. 0 - 5 years
KDH1007453	Kisumu DH	7/5/2010	Kisumu	Male	Kisumu	No		Yes		2	3	No			Fever	2	13.5	38.5	168	Malaria		15750					Lake Endemic	2	0 - 5 years	Wild type	Mutant	Wild type	2010-07-05	2010	3	1	0	3-2010	Fever	9.6646	3. Lake Endemic	MDR86	1. 0 - 5 years
KDH0910278	Kisumu DH	10/19/2009	Kisumu	Female	Kisumu	No		Yes		4	3	No			Headache	3				Malaria		13500					Lake Endemic	20	Above 15 years	Mutant	Wild type	Mutant	2009-10-19	2009	4	1	1	4-2009	Headache	9.51044	3. Lake Endemic	MDR184	3. Above 15 years
KDH1012531	Kisumu DH	12/6/2010	Kisumu	Male	Kisumu	No		No				No			Fever	3	10	40	188	Malaria		117000					Lake Endemic	2	0 - 5 years	Wild type	Wild type	wild type/Mutant	2010-12-06	2010	4	0	0	4-2010	Fever	11.6699	3. Lake Endemic		1. 0 - 5 years
KDH0911297	Kisumu DH	11/16/2009	Kisumu	Male	Kisumu	No		Yes		2		No			Fever	2	11	35.7	96	Malaria		112500					Lake Endemic	3	0 - 5 years	Mutant	Wild type	undetermined	2009-11-16	2009	4	1	1	4-2009	Fever	11.6307	3. Lake Endemic	CRT76	1. 0 - 5 years
KDH0804019	Kisumu DH	4/2/2008	Kisumu	Female	Kisumu	Yes	<2weeks	No				No			Fever	3	9.6	37.9	160	Malaria		54000					Lake Endemic	0	0 - 5 years	Mutant	Wild type	Mutant	2008-04-02	2008	2	1	1	2-2008	Fever	10.8967	3. Lake Endemic	MDR184	1. 0 - 5 years
KDH1108689	Kisumu DH	8/15/2011	Kisumu	Female	Kisumu	Yes	2-4 weeks	Yes	1	6		No			Fever	2	17	37.7	116	Malaria		69750					Lake Endemic	4	0 - 5 years	wild type/Mutant	Wild type	Mutant	2011-08-15	2011	3	1	0	3-2011	Fever	11.1527	3. Lake Endemic	MDR184	1. 0 - 5 years
KDH0911301	Kisumu DH	11/19/2009	Kisumu	Female	Kisumu	Yes	2-4 weeks	Yes		3	4	No			Fever	2	8.6	39.4	156	Malaria		20250					Lake Endemic	1	0 - 5 years	Mutant	undetermined	undetermined	2009-11-19	2009	4	1	1	4-2009	Fever	9.91591	3. Lake Endemic	CRT76	1. 0 - 5 years
KDH0906233	Kisumu DH	6/15/2009	Kisumu	Male	Kisumu	Yes	<2weeks	Yes		10	1	No			Fever		14	39.2	12	Malaria		4500					Lake Endemic	4	0 - 5 years	Wild type	Wild type	Mutant	2009-06-15	2009	2	1	0	2-2009	Fever	8.41183	3. Lake Endemic	MDR184	1. 0 - 5 years
KDH1102566	Kisumu DH	2/9/2011	Kisumu	Male	Kisumu	No		Yes	1		1	No			Fever	3	66	37.5	90	Malaria		13500					Lake Endemic	15	6 - 15 years	Wild type	Wild type	Mutant	2011-02-09	2011	1	1	0	1-2011	Fever	9.51044	3. Lake Endemic	MDR184	2. 6 - 15 years
KDH1102572	Kisumu DH	2/22/2011	Kisumu	Male	Kisumu	Yes	2-4 weeks	Yes	11			No			Headache	1	55	37.7	90	Malaria		22500					Lake Endemic	24	Above 15 years	Mutant	Wild type	Mutant	2011-02-22	2011	1	1	1	1-2011	Headache	10.0213	3. Lake Endemic	MDR184	3. Above 15 years
KDH1208876	Kisumu DH	8/1/2012	Kisumu	Male	Kisumu	No		Yes		2	1	No			Fever	1	18	37.8	136	Malaria		114750					Lake Endemic	4	0 - 5 years	wild type/Mutant	Wild type	Wild type	2012-08-01	2012	3	0	0	2-2013	Fever	11.6505	3. Lake Endemic		1. 0 - 5 years
KDH0806060	Kisumu DH	6/3/2008	Kisumu	Male	Kisumu	Yes	<2weeks	Yes		10	1	No			Headache	4	64	39.5	20	Malaria		6000					Lake Endemic	28	Above 15 years	Mutant	Mutant	Wild type	2008-06-03	2008	2	1	1	2-2008	Headache	8.69951	3. Lake Endemic	MDR86	3. Above 15 years
KDH0803010	Kisumu DH	3/25/2008	Kisumu	Male	Kisumu	Yes	<2weeks	Yes			6	Yes	Other	Hospital/Dispensary	Fever	4	13.1	35.7	135	Malaria		195750					Lake Endemic	3	0 - 5 years	wild type/Mutant	Mutant	Wild type	2008-03-25	2008	1	1	0	1-2008	Fever	12.1846	3. Lake Endemic	MDR86	1. 0 - 5 years
KDH1010497	Kisumu DH	10/5/2010	Kisumu	Female	Kisumu	No		Yes		8	1	No			Vomiting	8	10	38.5	160	Malaria		58500					Lake Endemic	1	0 - 5 years	Mutant	Wild type	Wild type	2010-10-05	2010	4	1	1	4-2010	Others	10.9768	3. Lake Endemic	CRT76	1. 0 - 5 years
KDH14051394	Kisumu DH	5/8/2014	Kisumu	Male	Kisumu	No		Yes		9	1	No			Headache	2	23.5	37.9	113	Malaria		6750					Lake Endemic	5	0 - 5 years	Wild type	Wild type	Mutant	2014-05-08	2014	2	1	0	2-2014	Headache	8.8173	3. Lake Endemic	MDR184	1. 0 - 5 years
KDH0902180	Kisumu DH	2/12/2009	Kisumu	Female	Kisumu	Yes	2-4 weeks	Yes		1	4	Yes	Other	Hospital/Dispensary	Fever	1	65	39.1	107	Malaria		63000					Lake Endemic	20	Above 15 years	wild type/Mutant	Mutant	Wild type	2009-02-12	2009	1	1	0	1-2009	Fever	11.0509	3. Lake Endemic	MDR86	3. Above 15 years
KDH1106651	Kisumu DH	6/15/2011	Kisumu	Male	Kisumu	No		No				No			Fever	7	11.5	37.3	192	Malaria		157500					Lake Endemic	2	0 - 5 years	Wild type	Wild type	undetermined	2011-06-15	2011	2	0	0	2-2013	Fever	11.9672	3. Lake Endemic		1. 0 - 5 years
KDH1010498	Kisumu DH	10/5/2010	Kisumu	Male	Kisumu	No		Yes		4	2	No			Vomiting	3	19	37.8	120	Malaria		166500					Lake Endemic	6	6 - 15 years	undetermined	wild type/Mutant	Mutant	2010-10-05	2010	4	1	2	4-2010	Others	12.0228	3. Lake Endemic	MDR184	2. 6 - 15 years
KDH1108680	Kisumu DH	8/8/2011	Kisumu	Male	Kisumu	Yes	1-2 months	Yes	1			No			Headache	6	51	39.6	120	Malaria		27000					Lake Endemic	14	6 - 15 years	Wild type	Wild type	undetermined	2011-08-08	2011	3	0	0	3-2011	Headache	10.2036	3. Lake Endemic		2. 6 - 15 years
KDH14021330	Kisumu DH	2/19/2014	Kisumu	Female	Kisumu	No		Yes		4	4	No			Fever	2	17	37.8	120	Malaria		121500					Lake Endemic	4	0 - 5 years	Wild type	Wild type	Wild type	2014-02-19	2014	1	0	0	1-2014	Fever	11.7077	3. Lake Endemic		1. 0 - 5 years
KDH0910275	Kisumu DH	10/16/2009	Kisumu	Male	Kisumu	Yes	1-2 months	Yes	5			No			Fever	3	70	39.7	94	Malaria		18000					Lake Endemic	24	Above 15 years	Mutant	Wild type	Mutant	2009-10-16	2009	4	1	1	4-2009	Fever	9.79813	3. Lake Endemic	MDR184	3. Above 15 years
KDH0812162	Kisumu DH	12/15/2008	Kisumu	Female	Kisumu	No		Yes		3	2	No			Fever	2	11	38	134	Malaria		49500					Lake Endemic	2	0 - 5 years	wild type/Mutant	Wild type	Wild type	2008-12-15	2008	4	0	0	4-2008	Fever	10.8097	3. Lake Endemic		1. 0 - 5 years
KDH1007455	Kisumu DH	7/8/2010	Kisumu	Female	Kisumu	No		Yes	1			No			Fever	3	18.4	38.2	134	Malaria		60750					Lake Endemic	5	0 - 5 years	undetermined	Wild type	Mutant	2010-07-08	2010	3	1	2	3-2010	Fever	11.0145	3. Lake Endemic	MDR184	1. 0 - 5 years
KDH0901169	Kisumu DH	1/21/2009	Kisumu	Male	Kisumu	Yes	2-4 weeks	Yes		1	1	Yes	Quinine	Hospital/Dispensary	Fever	3	18.5	38.7	119	Malaria	RTI	76500					Lake Endemic	4	0 - 5 years	Mutant	Wild type	Mutant	2009-01-21	2009	1	1	1	1-2009	Fever	11.245	3. Lake Endemic	MDR184	1. 0 - 5 years
KDH14011285	Kisumu DH	1/14/2014	Kisumu	Female	Kisumu	Yes	2-4 weeks	Yes	1		0	No			Headache	3	64	37	108	Malaria		13500					Lake Endemic	26	Above 15 years	Wild type	Wild type	Wild type	2014-01-14	2014	1	0	0	1-2014	Headache	9.51044	3. Lake Endemic		3. Above 15 years
KDH0904201	Kisumu DH	4/14/2009	Kisumu	Female	Kisumu	Yes	<2weeks	Yes		4	0	No			Vomiting	2	78	38.2	93	Malaria		63000					Lake Endemic	43	Above 15 years	wild type/Mutant	Wild type	Wild type	2009-04-14	2009	2	0	0	2-2009	Others	11.0509	3. Lake Endemic		3. Above 15 years
KDH1005428	Kisumu DH	5/27/2010	Kisumu	Female	Kisumu	No		Yes		4	5	No			Fever	1	10.6	36.3	163	Malaria		20250					Lake Endemic	2	0 - 5 years	undetermined	Wild type	Wild type	2010-05-27	2010	2	0	2	2-2010	Fever	9.91591	3. Lake Endemic		1. 0 - 5 years
KDH1011525	Kisumu DH	11/30/2010	Kisumu	Female	Kisumu	Yes	1-2 months	Yes		4	2	No			Fever	4	20	36.1	100	Malaria		186750	120				Lake Endemic	8	6 - 15 years	undetermined	undetermined	Mutant	2010-11-30	2010	4	1	2	4-2010	Fever	12.1375	3. Lake Endemic	MDR184	2. 6 - 15 years
KDH1006448	Kisumu DH	6/28/2010	Kisumu	Male	Kisumu	No		Yes		4	3	No			Fever	3	20	38.8	101	Malaria		22500					Lake Endemic	7	6 - 15 years	Mutant	Wild type	Wild type	2010-06-28	2010	2	1	1	2-2010	Fever	10.0213	3. Lake Endemic	CRT76	2. 6 - 15 years
KDH0805056	Kisumu DH	5/28/2008	Kisumu	Male	Kisumu	Yes	<2weeks	Yes		4	3	No				4	11.5	39.6	110			249750					Lake Endemic	2	0 - 5 years	wild type/Mutant	Wild type	Mutant	2008-05-28	2008	2	1	0	2-2008		12.4282	3. Lake Endemic	MDR184	1. 0 - 5 years
KDH14021342	Kisumu DH	2/27/2014	Kisumu	Male	Kisumu	Yes	<2weeks	Yes		4	1	No			Fever	2	15	39.6	176	Malaria		11250					Lake Endemic	2	0 - 5 years	Wild type	Wild type	Mutant	2014-02-27	2014	1	1	0	1-2014	Fever	9.32812	3. Lake Endemic	MDR184	1. 0 - 5 years
KOM1406261	Kombewa DH	6/11/2014	Kisumu	Female	Kisumu	No		Yes		1	3	Yes	Other	Hospital/Dispensary	Fever	2	11	38.2	133	Malaria		2880					Lake Endemic	3	0 - 5 years	Wild type	Wild type	wild type/Mutant	2014-06-11	2014	2	0	0	2-2014	Fever	7.96555	3. Lake Endemic		1. 0 - 5 years
KDH14011280	Kisumu DH	1/13/2014	Kisumu	Female	Kisumu	Yes	<2weeks	Yes		5	2	No			Fever	1	16	38.3	130	Malaria		27000					Lake Endemic	4	0 - 5 years	Wild type	Wild type	wild type/Mutant	2014-01-13	2014	1	0	0	1-2014	Fever	10.2036	3. Lake Endemic		1. 0 - 5 years
KDH0811147	Kisumu DH	11/4/2008	Kisumu	Female	Kisumu	Yes	2-4 weeks	Yes		2	2	No			Fever	3	10	40.4	182	Malaria	RTI	83250					Lake Endemic	1	0 - 5 years	Mutant	Mutant	Wild type	2008-11-04	2008	4	1	1	4-2008	Fever	11.3296	3. Lake Endemic	MDR86	1. 0 - 5 years
KDH0808098	Kisumu DH	8/14/2008	Kisumu	Male	Kisumu	No		Yes		1	2	Yes	Other	Hospital/Dispensary	Fever	2	86	37.8	159	Malaria		92250					Lake Endemic	0	0 - 5 years	Mutant	Wild type	Wild type	2008-08-14	2008	3	1	1	3-2008	Fever	11.4323	3. Lake Endemic	CRT76	1. 0 - 5 years
KDH13121260	Kisumu DH	12/3/2013	Kisumu	Female	Kisumu	Yes	<2weeks	Yes		3	4	No			Fever	4	26	37.4	132	Malaria		45000					Lake Endemic	7	6 - 15 years	Wild type	Wild type	Wild type	2013-12-03	2013	4	0	0	4-2013	Fever	10.7144	3. Lake Endemic		2. 6 - 15 years
KDH1108683	Kisumu DH	8/10/2011	Kisumu	Female	Kisumu	No		Yes	1	4		No			Headache	10	64	36.2	108	Malaria		11250					Lake Endemic	30	Above 15 years	Wild type	undetermined	Mutant	2011-08-10	2011	3	1	0	3-2011	Headache	9.32812	3. Lake Endemic	MDR184	3. Above 15 years
KDH1111749	Kisumu DH	11/9/2011	Kisumu	Female	Kisumu	No		No				No			Fever	1	12	37.3	96	Malaria		29250					Lake Endemic	1	0 - 5 years	Wild type	wild type/Mutant	Mutant	2011-11-09	2011	4	1	0	4-2011	Fever	10.2836	3. Lake Endemic	MDR184	1. 0 - 5 years
KDH0910285	Kisumu DH	10/23/2009	Kisumu	Female	Kisumu	No		Yes		4	3	No			Fever		9	38.5	90	Malaria		4500					Lake Endemic	1	0 - 5 years	wild type/Mutant	undetermined	undetermined	2009-10-23	2009	4	0	0	4-2009	Fever	8.41183	3. Lake Endemic		1. 0 - 5 years
KDH1003359	Kisumu DH	3/3/2010	Kisumu	Male	Kisumu	No		Yes		8	1	No			Headache	8	32	36.2	108	Malaria		11250					Lake Endemic	10	6 - 15 years	undetermined	wild type/Mutant	Wild type	2010-03-03	2010	1	0	2	1-2010	Headache	9.32812	3. Lake Endemic		2. 6 - 15 years
KDH1004401	Kisumu DH	4/19/2010	Kisumu	Female	Kisumu	No		Yes		3	10	No			Fever	2	16	38.5	171	Malaria		303750					Lake Endemic	3	0 - 5 years	Wild type	Wild type	Mutant	2010-04-19	2010	2	1	0	2-2010	Fever	12.624	3. Lake Endemic	MDR184	1. 0 - 5 years
KDH0804029	Kisumu DH	4/21/2008	Kisumu	Female	Kisumu	Yes	<2weeks	Yes		5	1	No			Fever	5	11.5	39.8	170	Malaria		65250					Lake Endemic	2	0 - 5 years	wild type/Mutant	Wild type	Mutant	2008-04-21	2008	2	1	0	2-2008	Fever	11.086	3. Lake Endemic	MDR184	1. 0 - 5 years
KDH1005419	Kisumu DH	5/7/2010	Kisumu	Male	Kisumu	No		Yes		2	4	No			Fever	2	16.9	38.4	146	Malaria		36000					Lake Endemic	5	0 - 5 years	Mutant	Wild type	Wild type	2010-05-07	2010	2	1	1	2-2010	Fever	10.4913	3. Lake Endemic	CRT76	1. 0 - 5 years
KDH1209888	Kisumu DH	9/14/2012	Kisumu	Female	Kisumu	No		Yes		5	1	No			Fever	7	16	39.8	112	Malaria		42750					Lake Endemic	5	0 - 5 years	undetermined	Wild type	wild type/Mutant	2012-09-14	2012	3	0	2	2-2013	Fever	10.6631	3. Lake Endemic		1. 0 - 5 years
KOM1407288	Kombewa DH	7/8/2014	Kisumu	Female	Kisumu	No		Yes		2	3	No			Fever	3	14	39.3	103	Malaria		246400					Lake Endemic	4	0 - 5 years	Wild type	Wild type	Wild type	2014-07-08	2014	3	0	0	3-2014	Fever	12.4147	3. Lake Endemic		1. 0 - 5 years
KDH0907244	Kisumu DH	7/14/2009	Kisumu	Male	Kisumu	No		Yes		1	6	Yes	Artenam	Hospital/Dispensary	Fever	4	15	37.1	125	Malaria		787500					Lake Endemic	4	0 - 5 years	wild type/Mutant	Wild type	undetermined	2009-07-14	2009	3	0	0	3-2009	Fever	13.5766	3. Lake Endemic		1. 0 - 5 years
KOM1402158	Kombewa DH	2/17/2014	Kisumu	Male	Kisumu	No		Yes		3	4	No			Fever	2	12	38.1	117	Malaria		138720					Lake Endemic	3	0 - 5 years	Wild type	Wild type	wild type/Mutant	2014-02-17	2014	1	0	0	1-2014	Fever	11.8402	3. Lake Endemic		1. 0 - 5 years
KDH0808104	Kisumu DH	8/26/2008	Kisumu	Female	Kisumu	Yes	2-4 weeks	Yes		4	2	No			Fever	14	18	37.9	129	Malaria	RTI	38250					Lake Endemic	6	6 - 15 years	Mutant	Mutant	Wild type	2008-08-26	2008	3	1	1	3-2008	Fever	10.5519	3. Lake Endemic	MDR86	2. 6 - 15 years
KDH1206860	Kisumu DH	6/25/2012	Kisumu	Female	Kisumu	No		Yes	1	1	0	No			Fever	1	14	39.5	152	Malaria		6750					Lake Endemic	3	0 - 5 years	Wild type	wild type/Mutant	Wild type	2012-06-25	2012	2	0	0	2-2012	Fever	8.8173	3. Lake Endemic		1. 0 - 5 years
KDH1207863	Kisumu DH	7/11/2012	Kisumu	Male	Kisumu	Yes	1-2 months	Yes	2		0	No			Headache	2	72	35.9	80	Malaria		110250					Lake Endemic	56	Above 15 years	Wild type	Wild type	Mutant	2012-07-11	2012	3	1	0	2-2013	Headache	11.6105	3. Lake Endemic	MDR184	3. Above 15 years
KOM1405230	Kombewa DH	5/8/2014	Kisumu	Female	Kisumu	Yes	1-2 months	Yes		2	3	No			Vomiting	2	14	37.1	97	Malaria		77720					Lake Endemic	4	0 - 5 years	Wild type	Wild type	wild type/Mutant	2014-05-08	2014	2	0	0	2-2014	Others	11.2609	3. Lake Endemic		1. 0 - 5 years
KDH0911303	Kisumu DH	11/23/2009	Kisumu	Male	Kisumu	No		Yes	1			No			Headache	6	49	36.2	104	Malaria		157500					Lake Endemic	28	Above 15 years	wild type/Mutant	Mutant	undetermined	2009-11-23	2009	4	1	0	4-2009	Headache	11.9672	3. Lake Endemic	MDR86	3. Above 15 years
KDH14021322	Kisumu DH	2/7/2014	Kisumu	Male	Kisumu	No		Yes		5	3	No			Fever	2	17.1	38.3	136	Malaria		13500					Lake Endemic	4	0 - 5 years	Wild type	Wild type	wild type/Mutant	2014-02-07	2014	1	0	0	1-2014	Fever	9.51044	3. Lake Endemic		1. 0 - 5 years
KDH1004395	Kisumu DH	4/14/2010	Kisumu	Female	Kisumu	No		Yes	1	2		No			Dizziness	2	61	37.7	80	Malaria		9000					Lake Endemic	20	Above 15 years	Wild type	Wild type	Wild type	2010-04-14	2010	2	0	0	2-2010	Others	9.10498	3. Lake Endemic		3. Above 15 years
KDH0905223	Kisumu DH	5/27/2009	Kisumu	Male	Kisumu	Yes	<2weeks	Yes		3	3	Yes	Other	Hospital/Dispensary	Fever	1	12.5	37.4	92	Malaria		101250					Lake Endemic			Mutant	wild type/Mutant	Wild type	2009-05-27	2009	2	1	1	2-2009	Fever	11.5253	3. Lake Endemic	CRT76
KDH0902181	Kisumu DH	2/16/2009	Kisumu	Female	Kisumu	Yes	1-2 months	Yes	5			No			Fever	2	28	39.4	145	Malaria		63000					Lake Endemic	8	6 - 15 years	Mutant	Mutant	Wild type	2009-02-16	2009	1	1	1	1-2009	Fever	11.0509	3. Lake Endemic	MDR86	2. 6 - 15 years
KDH0809133	Kisumu DH	9/24/2008	Kisumu	Female	Kisumu	Yes		Yes			4	Yes	Quinine		Headache	2	28	38.3	112	Malaria		92250					Lake Endemic	7	6 - 15 years	Mutant	Mutant	Wild type	2008-09-24	2008	3	1	1	3-2008	Headache	11.4323	3. Lake Endemic	MDR86	2. 6 - 15 years
KDH0903188	Kisumu DH	3/4/2009	Kisumu	Male	Kisumu	Yes	2-4 weeks	No				No			Headache	5	56	36.8	68	Malaria		27000					Lake Endemic	19	Above 15 years	Mutant	Wild type	Mutant	2009-03-04	2009	1	1	1	1-2009	Headache	10.2036	3. Lake Endemic	MDR184	3. Above 15 years
KDH1001340	Kisumu DH	1/27/2010	Kisumu	Female	Kisumu	No		Yes		3	3	No			Fever	2	15	38.5	152	Malaria		65250					Lake Endemic	3	0 - 5 years	undetermined	Mutant	Wild type	2010-01-27	2010	1	1	2	1-2010	Fever	11.086	3. Lake Endemic	MDR86	1. 0 - 5 years
KDH1107663	Kisumu DH	7/14/2011	Kisumu	Female	Kisumu	No		Yes		9		No			Fever	2	7.4	39	144	Malaria		2120					Lake Endemic	1	0 - 5 years	Wild type	undetermined	undetermined	2011-07-14	2011	3	0	0	3-2011	Fever	7.65917	3. Lake Endemic		1. 0 - 5 years
KDH1001342	Kisumu DH	1/27/2010	Kisumu	Male	Kisumu	Yes	1-2 months	No				No			Vomiting	7	35	36	119	Malaria		54000					Lake Endemic	14	6 - 15 years	wild type/Mutant	wild type/Mutant	undetermined	2010-01-27	2010	1	0	0	1-2010	Others	10.8967	3. Lake Endemic		2. 6 - 15 years
KDH14011273	Kisumu DH	1/9/2014	Kisumu	Male	Kisumu	Yes	2-4 weeks	Yes	1		0	No			Headache	4	70	37	96	Malaria		38250					Lake Endemic	24	Above 15 years	Wild type	wild type/Mutant	wild type/Mutant	2014-01-09	2014	1	0	0	1-2014	Headache	10.5519	3. Lake Endemic		3. Above 15 years
KDH0905219	Kisumu DH	5/22/2009	Kisumu	Male	Kisumu	No		Yes			1	No			Headache	7	15	39.6	109	Malaria		40500					Lake Endemic			Mutant	wild type/Mutant	Wild type	2009-05-22	2009	2	1	1	2-2009	Headache	10.6091	3. Lake Endemic	CRT76
KDH1005422	Kisumu DH	5/18/2010	Kisumu	Female	Kisumu	Yes	1-2 months	Yes		6	1	No			Headache	2	23	39.3	132	Malaria		24750					Lake Endemic	11	6 - 15 years	wild type/Mutant	Wild type	Wild type	2010-05-18	2010	2	0	0	2-2010	Headache	10.1166	3. Lake Endemic		2. 6 - 15 years
KDH0803014	Kisumu DH	3/27/2009	Kisumu	Female	Kisumu	No		Yes		1	1	Yes	Other		Stomachache	6	65	36.2	110	Malaria		27000					Lake Endemic	18	Above 15 years	Mutant	Wild type	Mutant	2009-03-27	2009	1	1	1	1-2009	Others	10.2036	3. Lake Endemic	MDR184	3. Above 15 years
KDH14011281	Kisumu DH	1/14/2014	Kisumu	Female	Kisumu	No		No				No			Fever	1	7	38	149	Malaria		9000					Lake Endemic	0	0 - 5 years	Wild type	Wild type	Mutant	2014-01-14	2014	1	1	0	1-2014	Fever	9.10498	3. Lake Endemic	MDR184	1. 0 - 5 years
KOM1311102	Kombewa DH	11/6/2013	Kisumu	Female	Kisumu	No		Yes	1		0	No			Headache	2	55	38.1	121	Malaria		36800					Lake Endemic	25	Above 15 years	Wild type	undetermined	undetermined	2013-11-06	2013	4	0	0	4-2013	Headache	10.5133	3. Lake Endemic		3. Above 15 years
KDH1111754	Kisumu DH	11/11/2011	Kisumu	Female	Kisumu	No		Yes	1		1	No			Fever	4	34	37.6	96	Malaria		29250					Lake Endemic	12	6 - 15 years	wild type/Mutant	Wild type	wild type/Mutant	2011-11-11	2011	4	0	0	4-2011	Fever	10.2836	3. Lake Endemic		2. 6 - 15 years
KDH1108679	Kisumu DH	8/8/2011	Kisumu	Male	Kisumu	Yes	1-2 months	Yes				No			Headache	2	28	36.4	124	Malaria		13500					Lake Endemic	9	6 - 15 years	Mutant	Wild type	undetermined	2011-08-08	2011	3	1	1	3-2011	Headache	9.51044	3. Lake Endemic	CRT76	2. 6 - 15 years
KOM1405274	Kombewa DH	6/23/2014	Kisumu	Female	Kisumu	No		Yes		3	1	No			Headache	2	25	37.2	77	Malaria		395520					Lake Endemic	10	6 - 15 years	Wild type	Wild type	Mutant	2014-06-23	2014	2	1	0	2-2014	Headache	12.888	3. Lake Endemic	MDR184	2. 6 - 15 years
KDH1106644	Kisumu DH	6/3/2011	Kisumu	Female	Kisumu	Yes	2-4 weeks	Yes		9	1	No			Fever	1	15	38.7	164	Malaria		63000					Lake Endemic	4	0 - 5 years	Wild type	Wild type	undetermined	2011-06-03	2011	2	0	0	2-2013	Fever	11.0509	3. Lake Endemic		1. 0 - 5 years
KDH1201788	Kisumu DH	1/23/2012	Kisumu	Female	Kisumu	No		Yes		7	1	No			Headache	2	55	38.6	128	Malaria		720000					Lake Endemic	15	6 - 15 years	wild type/Mutant	wild type/Mutant	Mutant	2012-01-23	2012	1	1	0	1-2012	Headache	13.487	3. Lake Endemic	MDR184	2. 6 - 15 years
KDH14011272	Kisumu DH	1/9/2014	Kisumu	Male	Kisumu	Yes	2-4 weeks	Yes	10		0	No			Fever	1	79	36.9	84	Malaria		11250					Lake Endemic	27	Above 15 years	Wild type	Wild type	Wild type	2014-01-09	2014	1	0	0	1-2014	Fever	9.32812	3. Lake Endemic		3. Above 15 years
KDH0903192	Kisumu DH	3/16/2009	Kisumu	Male	Kisumu	Yes	<2weeks	Yes		2	0	No			Headache	14	36	39.1	94	Malaria		4500					Lake Endemic	15	6 - 15 years	wild type/Mutant	Wild type	wild type/Mutant	2009-03-16	2009	1	0	0	1-2009	Headache	8.41183	3. Lake Endemic		2. 6 - 15 years
KOM1311114	Kombewa DH	11/21/2013	Kisumu	Male	Kisumu	No		Yes		6	2	No			Headache	3	23	37.3	126	Malaria		200					Lake Endemic	5	0 - 5 years	Wild type	Wild type	wild type/Mutant	2013-11-21	2013	4	0	0	4-2013	Headache	5.29832	3. Lake Endemic		1. 0 - 5 years
KDH0904202	Kisumu DH	4/15/2009	Kisumu	Female	Kisumu	No		Yes		6	2	No			Seizure	1	12.5	35.8	123	Malaria		119250					Lake Endemic	2	0 - 5 years	Wild type	Mutant	Wild type	2009-04-15	2009	2	1	0	2-2009	Others	11.689	3. Lake Endemic	MDR86	1. 0 - 5 years
KDH1009487	Kisumu DH	9/14/2010	Kisumu	Female	Kisumu	Yes	<2weeks	Yes		1	2	Yes	Fansidar	Hospital/Dispensary	Fever	1	10.6	39.2	168	Malaria		81000					Lake Endemic	1	0 - 5 years	wild type/Mutant	Wild type	Mutant	2010-09-14	2010	3	1	0	3-2010	Fever	11.3022	3. Lake Endemic	MDR184	1. 0 - 5 years
KDH1011524	Kisumu DH	11/30/2010	Kisumu	Male	Kisumu	No		Yes		7	1	No			Vomiting	3	58	36.3	104	Malaria		56250					Lake Endemic	37	Above 15 years	Wild type	wild type/Mutant	Wild type	2010-11-30	2010	4	0	0	4-2010	Others	10.9376	3. Lake Endemic		3. Above 15 years
KOM1403169	Kombewa DH	3/3/2014	Kisumu	Female	Kisumu	No		Yes		2	3	No			Fever	2	29	37.6	104	Malaria		25600					Lake Endemic	9	6 - 15 years	Wild type	Wild type	Mutant	2014-03-03	2014	1	1	0	1-2014	Fever	10.1503	3. Lake Endemic	MDR184	2. 6 - 15 years
KDH0805039	Kisumu DH	5/8/2008	Kisumu	Female	Kisumu	Yes	<2weeks	Yes		9	1	No			Stomachache	14	15	36.5	86	Malaria		6840					Lake Endemic	3	0 - 5 years	Mutant	Mutant	Wild type	2008-05-08	2008	2	1	1	2-2008	Others	8.83054	3. Lake Endemic	MDR86	1. 0 - 5 years
KDH1002348	Kisumu DH	2/8/2010	Kisumu	Female	Kisumu	No		Yes		6	1	No			Headache	1	30	37.4	104	Malaria		9000					Lake Endemic	11	6 - 15 years	wild type/Mutant	Wild type	undetermined	2010-02-08	2010	1	0	0	1-2010	Headache	9.10498	3. Lake Endemic		2. 6 - 15 years
KDH1002347	Kisumu DH	2/8/2010	Kisumu	Female	Kisumu	Yes	1-2 months	Yes		6	2	No			Headache	5	55	36.8	87	Malaria		54000					Lake Endemic	18	Above 15 years	Mutant	Wild type	undetermined	2010-02-08	2010	1	1	1	1-2010	Headache	10.8967	3. Lake Endemic	CRT76	3. Above 15 years
KOM1401140	Kombewa DH	1/27/2014	Kisumu	Female	Kisumu	No		Yes		6	2	No			Fever	2	11	37.8	109	Malaria		177280					Lake Endemic	1	0 - 5 years	Wild type	Wild type	Wild type	2014-01-27	2014	1	0	0	1-2014	Fever	12.0855	3. Lake Endemic		1. 0 - 5 years
KDH1005412	Kisumu DH	5/3/2010	Kisumu	Male	Kisumu	No		No				No			Fever	2	8.6	38.2	142	Malaria		45000					Lake Endemic	12	6 - 15 years	Wild type	Wild type	Mutant	2010-05-03	2010	2	1	0	2-2010	Fever	10.7144	3. Lake Endemic	MDR184	2. 6 - 15 years
KDH0902175	Kisumu DH	2/4/2009	Kisumu	Female	Kisumu	Yes	<2weeks	No				No			Vomiting	9	21	37.5	120	Malaria		45000					Lake Endemic	6	6 - 15 years	wild type/Mutant	Wild type	undetermined	2009-02-04	2009	1	0	0	1-2009	Others	10.7144	3. Lake Endemic		2. 6 - 15 years
KDH0806074	Kisumu DH	6/17/2008	Kisumu	Female	Kisumu	Yes	1-2 months	Yes			5	Yes	Chloroquine		Headache	2	39	36.6	87	Malaria		33750					Lake Endemic	13	6 - 15 years	Mutant	Mutant	Wild type	2008-06-17	2008	2	1	1	2-2008	Headache	10.4267	3. Lake Endemic	MDR86	2. 6 - 15 years
KDH1101549	Kisumu DH	1/14/2011	Kisumu	Male	Kisumu	Yes	<2weeks	Yes		9	1	No			Fever	2	11	37	136	Malaria		27000					Lake Endemic	2	0 - 5 years	Wild type	Wild type	Mutant	2011-01-14	2011	1	1	0	1-2011	Fever	10.2036	3. Lake Endemic	MDR184	1. 0 - 5 years
KDH0910266	Kisumu DH	10/7/2009	Siaya	Male	Siaya	No		Yes			2	No			Fever	7	19	36.4	80	Malaria		4500					Lake Endemic	10	6 - 15 years	wild type/Mutant	wild type/Mutant	Mutant	2009-10-07	2009	4	1	0	4-2009	Fever	8.41183	3. Lake Endemic	MDR184	2. 6 - 15 years
KDH1002349	Kisumu DH	2/9/2010	Kisumu	Female	Kisumu	No		Yes		3	1	No			Fever	2	10	39.2	120	Malaria		18000					Lake Endemic	2	0 - 5 years	undetermined	wild type/Mutant	undetermined	2010-02-09	2010	1	0	2	1-2010	Fever	9.79813	3. Lake Endemic		1. 0 - 5 years
KOM1406252	Kombewa DH	6/4/2014	Kisumu	Female	Kisumu	No		Yes		1	2	Yes	Other	Hospital/Dispensary	Fever	2	14	37.4	88	Malaria		24480					Lake Endemic	3	0 - 5 years	Wild type	Wild type	wild type/Mutant	2014-06-04	2014	2	0	0	2-2014	Fever	10.1056	3. Lake Endemic		1. 0 - 5 years
KDH1004405	Kisumu DH	4/26/2010	Kisumu	Male	Kisumu	No		No				No			Fever	9	20	36.7	84	Malaria		27000					Lake Endemic	6	6 - 15 years	Mutant	Wild type	Mutant	2010-04-26	2010	2	1	1	2-2010	Fever	10.2036	3. Lake Endemic	MDR184	2. 6 - 15 years
KOM1405235	Kombewa DH	5/15/2014	Kisumu	Male	Kisumu	No		Yes		5	2	No			Fever	2	10	37.5	92	Malaria		120					Lake Endemic	3	0 - 5 years	wild type/Mutant	Wild type	wild type/Mutant	2014-05-15	2014	2	0	0	2-2014	Fever	4.78749	3. Lake Endemic		1. 0 - 5 years
KDH1102565	Kisumu DH	2/8/2011	Kisumu	Male	Kisumu	No		Yes		2	2	No			Fever	1	31	37.1	100	Malaria		29250					Lake Endemic	10	6 - 15 years	wild type/Mutant	Wild type	Wild type	2011-02-08	2011	1	0	0	1-2011	Fever	10.2836	3. Lake Endemic		2. 6 - 15 years
KDH1105637	Kisumu DH	5/24/2011	Kisumu	Male	Kisumu	No		Yes		2	1	No			Fever	2	8	38.6	172	Malaria		2960					Lake Endemic	0	0 - 5 years	Wild type	Wild type	undetermined	2011-05-24	2011	2	0	0	2-2013	Fever	7.99294	3. Lake Endemic		1. 0 - 5 years
KDH1101554	Kisumu DH	1/20/2011	Kisumu	Male	Kisumu	No		Yes		2	2	No			Fever	2	15	36.7	11	Malaria		216000					Lake Endemic	3	0 - 5 years	Wild type	Wild type	Wild type	2011-01-20	2011	1	0	0	1-2011	Fever	12.283	3. Lake Endemic		1. 0 - 5 years
KOM1311113	Kombewa DH	11/20/2013	Kisumu	Female	Kisumu	No		Yes		3	4	No			Fever	4	16.1	37.1	121	Malaria		560					Lake Endemic	4	0 - 5 years	Wild type	Wild type	wild type/Mutant	2013-11-20	2013	4	0	0	4-2013	Fever	6.32794	3. Lake Endemic		1. 0 - 5 years
KDH1004398	Kisumu DH	4/16/2010	Kisumu	Female	Kisumu	No		Yes	2			No			Fever	2	15	39.9	160	Malaria		49500					Lake Endemic	4	0 - 5 years	Mutant	Wild type	Wild type	2010-04-16	2010	2	1	1	2-2010	Fever	10.8097	3. Lake Endemic	CRT76	1. 0 - 5 years
KDH1201791	Kisumu DH	1/27/2012	Kisumu	Male	Kisumu	Yes	1-2 months	Yes		3	3	No			Headache	1	51	37.1	124	Malaria		263250					Lake Endemic	30	Above 15 years	Mutant	Mutant	Wild type	2012-01-27	2012	1	1	1	1-2012	Headache	12.4809	3. Lake Endemic	MDR86	3. Above 15 years
KDH0804030	Kisumu DH	4/21/2008	Kisumu	Male	Kisumu	Yes	2-4 weeks	Yes		9	1	No			Headache	4	64	37.7	70	Malaria		31500					Lake Endemic	21	Above 15 years	wild type/Mutant	wild type/Mutant	Wild type	2008-04-21	2008	2	0	0	2-2008	Headache	10.3577	3. Lake Endemic		3. Above 15 years
KDH1006441	Kisumu DH	6/14/2010	Kisumu	Male	Kisumu	Yes	1-2 months	Yes	4			No			Headache	2	71	37	79	Malaria		13500					Lake Endemic	42	Above 15 years	Mutant	Mutant	Wild type	2010-06-14	2010	2	1	1	2-2010	Headache	9.51044	3. Lake Endemic	MDR86	3. Above 15 years
KDH14031350	Kisumu DH	3/12/2014	Kisumu	Female	Kisumu	Yes	1-2 months	Yes		7	1	No			Fever	3	10.5	39.4	154	Malaria		78750					Lake Endemic	1	0 - 5 years	Wild type	Wild type	wild type/Mutant	2014-03-12	2014	1	0	0	1-2014	Fever	11.274	3. Lake Endemic		1. 0 - 5 years
KDH1206856	Kisumu DH	6/15/2012	Kisumu	Male	Kisumu	Yes	1-2 months	No				No			Fever	2	14	40	156	Malaria		56250					Lake Endemic	2	0 - 5 years	wild type/Mutant	Wild type	Mutant	2012-06-15	2012	2	1	0	2-2012	Fever	10.9376	3. Lake Endemic	MDR184	1. 0 - 5 years
KDH1108676	Kisumu DH	8/4/2011	Kisumu	Male	Kisumu	No		Yes		1	1	No			Headache	9	28	36.3	76			67500					Lake Endemic	10	6 - 15 years	wild type/Mutant	Wild type	Mutant	2011-08-04	2011	3	1	0	3-2011	Headache	11.1199	3. Lake Endemic	MDR184	2. 6 - 15 years
KOM1403187	Kombewa DH	3/17/2014	Kisumu	Female	Kisumu	No		Yes		2	4	No			Fever	2	15	39.1	128	Malaria		25120					Lake Endemic	3	0 - 5 years	Wild type	Wild type	wild type/Mutant	2014-03-17	2014	1	0	0	1-2014	Fever	10.1314	3. Lake Endemic		1. 0 - 5 years
KDH1108685	Kisumu DH	8/12/2011	Kisumu	Female	Kisumu	Yes	2-4 weeks	Yes		3	1	No			Fever	1	13	38.4	152	Malaria		18000					Lake Endemic	3	0 - 5 years	Wild type	Wild type	undetermined	2011-08-12	2011	3	0	0	3-2011	Fever	9.79813	3. Lake Endemic		1. 0 - 5 years
KDH1003388	Kisumu DH	3/29/2010	Kisumu	Male	Kisumu	No		Yes		1	5	Yes	Other	Hospital/Dispensary	Fever	3	10.4	39.4	160	Malaria		11250					Lake Endemic	2	0 - 5 years	wild type/Mutant	Wild type	wild type/Mutant	2010-03-29	2010	1	0	0	1-2010	Fever	9.32812	3. Lake Endemic		1. 0 - 5 years
KDH1003387	Kisumu DH	3/23/2010	Kisumu	Female	Kisumu	Yes	2-4 weeks	No				No			Fever	3	8.1	37.8	167	Malaria		130500					Lake Endemic	1	0 - 5 years	Mutant	Mutant	Wild type	2010-03-23	2010	1	1	1	1-2010	Fever	11.7791	3. Lake Endemic	MDR86	1. 0 - 5 years
KDH1003386	Kisumu DH	3/23/2010	Kisumu	Female	Kisumu	No		Yes		7	1	No			Headache	4	32	36.8	124	Malaria		11250					Lake Endemic	13	6 - 15 years	Mutant	Mutant	Wild type	2010-03-23	2010	1	1	1	1-2010	Headache	9.32812	3. Lake Endemic	MDR86	2. 6 - 15 years
KDH1007457	Kisumu DH	7/8/2010	Kisumu	Female	Kisumu	No		Yes		4	4	No			Fever	1	13	37.3	146	Malaria		735750					Lake Endemic	2	0 - 5 years	wild type/Mutant	Wild type	wild type/Mutant	2010-07-08	2010	3	0	0	3-2010	Fever	13.5086	3. Lake Endemic		1. 0 - 5 years
KOM1402145	Kombewa DH	2/4/2014	Kisumu	Female	Kisumu	No		Yes		3	4	No			Fever	4	27	38.1	97	Malaria		69400					Lake Endemic	6	6 - 15 years	Wild type	Wild type	Wild type	2014-02-04	2014	1	0	0	1-2014	Fever	11.1476	3. Lake Endemic		2. 6 - 15 years
KDH0910282	Kisumu DH	10/22/2009	Kisumu	Female	Kisumu	No		Yes		5	5	No			Fever	4	12	39.2	94	Malaria		9000					Lake Endemic	2	0 - 5 years	wild type/Mutant	Wild type	undetermined	2009-10-22	2009	4	0	0	4-2009	Fever	9.10498	3. Lake Endemic		1. 0 - 5 years
KDH1005421	Kisumu DH	5/18/2010	Kisumu	Male	Kisumu	Yes	1-2 months	Yes	3			No			Fever	3	60	38.5	90	Malaria		130500					Lake Endemic	19	Above 15 years	undetermined	Wild type	undetermined	2010-05-18	2010	2	0	2	2-2010	Fever	11.7791	3. Lake Endemic		3. Above 15 years
KDH1012530	Kisumu DH	12/3/2010	Kisumu	Male	Kisumu	No		Yes		3	2	No			Diarrhea	3	9.4	36.8	160	Malaria		36000					Lake Endemic	0	0 - 5 years	undetermined	Wild type	Wild type	2010-12-03	2010	4	0	2	4-2010	Others	10.4913	3. Lake Endemic		1. 0 - 5 years
KDH1010501	Kisumu DH	10/15/2010	Kisumu	Male	Kisumu	No		Yes		2	4	No			Fever	2	12.3	38.4	134	Malaria		5760					Lake Endemic	2	0 - 5 years	Mutant	Wild type	Mutant	2010-10-15	2010	4	1	1	4-2010	Fever	8.65869	3. Lake Endemic	MDR184	1. 0 - 5 years
KDH1006439	Kisumu DH	6/7/2010	Kisumu	Male	Kisumu	No		No				No			Fever	2	7	38	180	Malaria		117000					Lake Endemic	0	0 - 5 years	Mutant	Mutant	Wild type	2010-06-07	2010	2	1	1	2-2010	Fever	11.6699	3. Lake Endemic	MDR86	1. 0 - 5 years
KOM1405237	Kombewa DH	5/15/2014	Kisumu	Male	Kisumu	No		Yes		4	3	No			Coughing	2	18	38.2	101	Malaria		108480					Lake Endemic	6	6 - 15 years	Mutant	Wild type	Mutant	2014-05-15	2014	2	1	1	2-2014	Coughing	11.5943	3. Lake Endemic	MDR184	2. 6 - 15 years
KOM1402163	Kombewa DH	2/21/2014	Kisumu	Female	Kisumu	Yes	<2weeks	Yes		2	3	No			Headache	4	70	37.1	81	Malaria		12320					Lake Endemic	23	Above 15 years	Wild type	Wild type	Mutant	2014-02-21	2014	1	1	0	1-2014	Headache	9.41898	3. Lake Endemic	MDR184	3. Above 15 years
KDH1208878	Kisumu DH	8/2/2012	Kisumu	Female	Kisumu	Yes	1-2 months	Yes	12		0	No			Headache	5	48	35.4	100	Malaria		33750					Lake Endemic	29	Above 15 years	wild type/Mutant	Mutant	Wild type	2012-08-02	2012	3	1	0	2-2013	Headache	10.4267	3. Lake Endemic	MDR86	3. Above 15 years
KDH1002358	Kisumu DH	2/10/2010	Kisumu	Female	Kisumu	No		Yes	2			No			Fever	2	14	38.5	100	Malaria		6750					Lake Endemic	2	0 - 5 years	wild type/Mutant	Wild type	Wild type	2010-02-10	2010	1	0	0	1-2010	Fever	8.8173	3. Lake Endemic		1. 0 - 5 years
KDH0910264	Kisumu DH	10/6/2009	Kisumu	Female	Kisumu	No		Yes		5	4	No			Fever	2	20	38.8	90	Malaria		40500					Lake Endemic	5	0 - 5 years	wild type/Mutant	Wild type	Mutant	2009-10-06	2009	4	1	0	4-2009	Fever	10.6091	3. Lake Endemic	MDR184	1. 0 - 5 years
KDH0803009	Kisumu DH	3/25/2008	Kisumu	Female	Kisumu	Yes	<2weeks	Yes		7	1	No			Fever	4	14	37.9	140	Malaria		22500					Lake Endemic	2	0 - 5 years	wild type/Mutant	Wild type	wild type/Mutant	2008-03-25	2008	1	0	0	1-2008	Fever	10.0213	3. Lake Endemic		1. 0 - 5 years
KDH1103582	Kisumu DH	3/18/2011	Kisumu	Male	Kisumu	Yes	2-4 weeks	Yes	4			No			Fever	14	59	36.7	93	Malaria		6750					Lake Endemic	36	Above 15 years	Wild type	undetermined	wild type/Mutant	2011-03-18	2011	1	0	0	1-2011	Fever	8.8173	3. Lake Endemic		3. Above 15 years
KDH14011271	Kisumu DH	1/9/2014	Kisumu	Female	Kisumu	No		Yes		9	1	No			Fever	1	18	38.5	128	Malaria		83250					Lake Endemic	4	0 - 5 years	Wild type	Wild type	wild type/Mutant	2014-01-09	2014	1	0	0	1-2014	Fever	11.3296	3. Lake Endemic		1. 0 - 5 years
KDH14011283	Kisumu DH	1/14/2014	Kisumu	Male	Kisumu	Yes	2-4 weeks	Yes		2	4	No			Fever	1	15.2	39.4	168	Malaria		85500					Lake Endemic	4	0 - 5 years	Wild type	Wild type	wild type/Mutant	2014-01-14	2014	1	0	0	1-2014	Fever	11.3563	3. Lake Endemic		1. 0 - 5 years
KOM1310085	Kombewa DH	10/15/2013	Kisumu	Male	Kisumu	No		Yes		3	6	No			Fever	2	24.5	37.9	106	Malaria		3040					Lake Endemic	8	6 - 15 years	Wild type	Wild type	Mutant	2013-10-15	2013	4	1	0	4-2013	Fever	8.01961	3. Lake Endemic	MDR184	2. 6 - 15 years
KDH1006440	Kisumu DH	6/14/2010	Kisumu	Male	Kisumu	No		Yes	2			No			Fever	5	24	39.3	150	Malaria		119250					Lake Endemic	8	6 - 15 years	Wild type	Wild type	Mutant	2010-06-14	2010	2	1	0	2-2010	Fever	11.689	3. Lake Endemic	MDR184	2. 6 - 15 years
KDH1201797	Kisumu DH	1/31/2012	Kisumu	Male	Kisumu	No		Yes		7	2	No			Fever	1	25	39.9	136	Malaria		128250					Lake Endemic	9	6 - 15 years	wild type/Mutant	Wild type	Mutant	2012-01-31	2012	1	1	0	1-2012	Fever	11.7617	3. Lake Endemic	MDR184	2. 6 - 15 years
KDH0810144	Kisumu DH	10/28/2008	Kisumu	Male	Kisumu	No		Yes		7	2	No			Fever	2	11	39	156	Malaria	RTI	177750					Lake Endemic	2	0 - 5 years	Mutant	wild type/Mutant	Wild type	2008-10-28	2008	4	1	1	4-2008	Fever	12.0881	3. Lake Endemic	CRT76	1. 0 - 5 years
KDH1003368	Kisumu DH	3/15/2010	Kisumu	Male	Kisumu	No		Yes		8	1	No			Headache	4	76	38.3	104	Malaria		31500					Lake Endemic	30	Above 15 years	Wild type	Wild type	Wild type	2010-03-15	2010	1	0	0	1-2010	Headache	10.3577	3. Lake Endemic		3. Above 15 years
KOM1403195	Kombewa DH	3/24/2014	Kisumu	Female	Kisumu	No		Yes		2	3	No			Fever	2	16	37.3	121	Malaria		50720					Lake Endemic	4	0 - 5 years	Wild type	Wild type	Wild type	2014-03-24	2014	1	0	0	1-2014	Fever	10.8341	3. Lake Endemic		1. 0 - 5 years
KDH1001334	Kisumu DH	1/26/2010	Kisumu	Female	Kisumu	No		Yes		8	1	No			Fever	3	15	39	153	Malaria		141750					Lake Endemic	4	0 - 5 years	undetermined	Wild type	undetermined	2010-01-26	2010	1	0	2	1-2010	Fever	11.8618	3. Lake Endemic		1. 0 - 5 years
KOM1407291	Kombewa DH	7/21/2014	Kisumu	Female	Kisumu	No		Yes		1	5	Yes	Other	Hospital/Dispensary	Headache	2	68	37.4	69	Malaria							Lake Endemic	39	Above 15 years	undetermined	wild type/Mutant	wild type/Mutant	2014-07-21	2014	3	0	2	3-2014	Headache		3. Lake Endemic		3. Above 15 years
KDH0808102	Kisumu DH	8/20/2008	Kisumu	Female	Kisumu	No		Yes	2			No			Fever	1	61	38.8	92			33750					Lake Endemic	24	Above 15 years	Mutant	Mutant	Wild type	2008-08-20	2008	3	1	1	3-2008	Fever	10.4267	3. Lake Endemic	MDR86	3. Above 15 years
KOM1404218	Kombewa DH	4/24/2014	Kisumu	Female	Kisumu	Yes	2-4 weeks	Yes		7	1	No			Joint Pains	2	69	37.5	79	Malaria		19360					Lake Endemic	31	Above 15 years	Wild type	Wild type	wild type/Mutant	2014-04-24	2014	2	0	0	2-2014	Joint Pains	9.87096	3. Lake Endemic		3. Above 15 years
KDH1012526	Kisumu DH	12/2/2010	Kisumu	Female	Kisumu	No		Yes		5	2	No			Headache	4	65	36	86	Malaria		101250					Lake Endemic	33	Above 15 years	undetermined	Mutant	Wild type	2010-12-02	2010	4	1	2	4-2010	Headache	11.5253	3. Lake Endemic	MDR86	3. Above 15 years
KDH1012527	Kisumu DH	12/3/2010	Kisumu	Female	Kisumu	No		No				No			Fever	1	12.5	39.3	108	Malaria		213750					Lake Endemic	2	0 - 5 years	undetermined	Wild type	Mutant	2010-12-03	2010	4	1	2	4-2010	Fever	12.2726	3. Lake Endemic	MDR184	1. 0 - 5 years
KDH1105621	Kisumu DH	5/5/2011	Kisumu	Male	Kisumu	No		Yes		8	1	No			Headache	2	35	37.6	108	Malaria		36000					Lake Endemic	9	6 - 15 years	wild type/Mutant	Wild type	Wild type	2011-05-05	2011	2	0	0	2-2013	Headache	10.4913	3. Lake Endemic		2. 6 - 15 years
KDH1003382	Kisumu DH	3/22/2010	Kisumu	Male	Kisumu	No		Yes		7	1	No			Fever	1	14.5	38.3	160	Malaria		29250					Lake Endemic	2	0 - 5 years	Mutant	Wild type	Wild type	2010-03-22	2010	1	1	1	1-2010	Fever	10.2836	3. Lake Endemic	CRT76	1. 0 - 5 years
KDH0911313	Kisumu DH	11/30/2009	Kisumu	Female	Kisumu	No		Yes	1		1	No			Fever	4	14	39.4	160	Malaria		114750					Lake Endemic	3	0 - 5 years	Mutant	undetermined	undetermined	2009-11-30	2009	4	1	1	4-2009	Fever	11.6505	3. Lake Endemic	CRT76	1. 0 - 5 years
KDH1004392	Kisumu DH	4/10/2010	Kisumu	Male	Kisumu	No		Yes	3			No			Headache	2	62	35.5	96	Malaria		110250					Lake Endemic	16	Above 15 years	Mutant	Wild type	Wild type	2010-04-10	2010	2	1	1	2-2010	Headache	11.6105	3. Lake Endemic	CRT76	3. Above 15 years
KDH13111223	Kisumu DH	11/5/2013	Kisumu	Female	Kisumu	Yes	1-2 months	Yes	1		0	No			Headache	6	55	35.9	84	Malaria							Lake Endemic	31	Above 15 years	Wild type	Wild type	wild type/Mutant	2013-11-05	2013	4	0	0	4-2013	Headache		3. Lake Endemic		3. Above 15 years
KDH0904205	Kisumu DH	4/24/2009	Kisumu	Male	Kisumu	No		No				No			Fever	1	6	38.3	100	Malaria		344250					Lake Endemic	9	6 - 15 years	wild type/Mutant	Wild type	Mutant	2009-04-24	2009	2	1	0	2-2009	Fever	12.7491	3. Lake Endemic	MDR184	2. 6 - 15 years
KDH1111755	Kisumu DH	11/14/2011	Kisumu	Male	Kisumu	No		Yes		5	1	No			Fever	3	12	37.9	140	Malaria	RTI	51750					Lake Endemic	3	0 - 5 years	wild type/Mutant	Wild type	wild type/Mutant	2011-11-14	2011	4	0	0	4-2011	Fever	10.8542	3. Lake Endemic		1. 0 - 5 years
KDH14041379	Kisumu DH	4/22/2014	Kisumu	Female	Kisumu	Yes	<2weeks	Yes	3		0	No			Fever	1	60	38.1	110	Malaria		873000					Lake Endemic	31	Above 15 years	Wild type	Wild type	wild type/Mutant	2014-04-22	2014	2	0	0	2-2014	Fever	13.6797	3. Lake Endemic		3. Above 15 years
KDH14051412	Kisumu DH	5/20/2014	Kisumu	Female	Kisumu	No		Yes		3	1	No			Headache	1	25	37.9	176	Malaria		81000					Lake Endemic	7	6 - 15 years	Wild type	Wild type	wild type/Mutant	2014-05-20	2014	2	0	0	2-2014	Headache	11.3022	3. Lake Endemic		2. 6 - 15 years
KDH0909258	Kisumu DH	9/24/2009	Kisumu	Male	Kisumu	No		Yes		2	3	No			Fever	5	16	38.4	90	Malaria		69750					Lake Endemic	6	6 - 15 years	Wild type	wild type/Mutant	Wild type	2009-09-24	2009	3	0	0	3-2009	Fever	11.1527	3. Lake Endemic		2. 6 - 15 years
KDH1109708	Kisumu DH	9/20/2011	Kisumu	Female	Kisumu	No		Yes		3	5	No			Headache	1	79	36.7	80	Malaria		204750					Lake Endemic	40	Above 15 years	wild type/Mutant	Wild type	undetermined	2011-09-20	2011	3	0	0	3-2011	Headache	12.2295	3. Lake Endemic		3. Above 15 years
KDH1003380	Kisumu DH	3/18/2010	Kisumu	Male	Kisumu	Yes	2-4 weeks	Yes		2	3	No			Stomachache	6	29	35.6	86	Malaria		126000					Lake Endemic	8	6 - 15 years	Wild type	Wild type	Wild type	2010-03-18	2010	1	0	0	1-2010	Others	11.744	3. Lake Endemic		2. 6 - 15 years
KDH1105630	Kisumu DH	5/12/2011	Kisumu	Female	Kisumu	Yes	2-4 weeks	Yes		11	1	No			Headache	3	104	36.6	112	Malaria		92250					Lake Endemic	31	Above 15 years	undetermined	Wild type	undetermined	2011-05-12	2011	2	0	2	2-2013	Headache	11.4323	3. Lake Endemic		3. Above 15 years
KDH1104614	Kisumu DH	4/27/2011	Kisumu	Female	Kisumu	No		Yes	3			No			Headache	2	64	35.1	120	Malaria		49500					Lake Endemic	20	Above 15 years	wild type/Mutant	wild type/Mutant	wild type/Mutant	2011-04-27	2011	2	0	0	2-2013	Headache	10.8097	3. Lake Endemic		3. Above 15 years
KDH14031345	Kisumu DH	3/7/2014	Kisumu	Female	Kisumu	Yes	<2weeks	Yes		3	3	No			Fever	3	13.2	37.1	161	Malaria	RTI	11250					Lake Endemic	3	0 - 5 years	Wild type	wild type/Mutant	wild type/Mutant	2014-03-07	2014	1	0	0	1-2014	Fever	9.32812	3. Lake Endemic		1. 0 - 5 years
KOM1401132	Kombewa DH	1/20/2014	Kisumu	Female	Kisumu	No		Yes		3	2	No			Coughing	3	14	37.7	120	Malaria		124000					Lake Endemic	3	0 - 5 years	Wild type	Wild type	wild type/Mutant	2014-01-20	2014	1	0	0	1-2014	Coughing	11.728	3. Lake Endemic		1. 0 - 5 years
KDH1008476	Kisumu DH	8/17/2010	Kisumu	Male	Kisumu	No		Yes			12	Yes	Camoquine	Hospital/Dispensary	Fever	4	15.5	38.1	160	Malaria		67500					Lake Endemic	2	0 - 5 years	Mutant	undetermined	undetermined	2010-08-17	2010	3	1	1	3-2010	Fever	11.1199	3. Lake Endemic	CRT76	1. 0 - 5 years
KDH1202803	Kisumu DH	2/8/2012	Kisumu	Male	Kisumu	No		Yes		3	1	No			Fever	3	8	37.2	148	Malaria		182250					Lake Endemic	0	0 - 5 years	Mutant	Wild type	wild type/Mutant	2012-02-08	2012	1	1	1	1-2012	Fever	12.1131	3. Lake Endemic	CRT76	1. 0 - 5 years
KDH1101543	Kisumu DH	1/6/2011	Kisumu	Male	Kisumu	Yes	2-4 weeks	Yes		4	3	No			Diarrhea	1	10.7	37.1	160	Malaria		58500					Lake Endemic	2	0 - 5 years	undetermined	Wild type	Wild type	2011-01-06	2011	1	0	2	1-2011	Others	10.9768	3. Lake Endemic		1. 0 - 5 years
KDH0805044	Kisumu DH	5/13/2008	Kisumu	Female	Kisumu	Yes	2-4 weeks	Yes		5		No			Fever	7	91	38.6	96	Malaria		3480					Lake Endemic	22	Above 15 years	wild type/Mutant	wild type/Mutant	wild type/Mutant	2008-05-13	2008	2	0	0	2-2008	Fever	8.15479	3. Lake Endemic		3. Above 15 years
KDH1006445	Kisumu DH	6/21/2010	Kisumu	Female	Kisumu	No		Yes	2			No			Headache	3	73	39.6	136	Malaria		38250					Lake Endemic	21	Above 15 years	Wild type	Wild type	undetermined	2010-06-21	2010	2	0	0	2-2010	Headache	10.5519	3. Lake Endemic		3. Above 15 years
KDH0811150	Kisumu DH	11/17/2008	Kisumu	Male	Kisumu	Yes	<2weeks	Yes		1	2	Yes	Other		Fever	6	14	38.2	135	Malaria	Tinea Capitis	139500					Lake Endemic	2	0 - 5 years	Mutant	Mutant	Wild type	2008-11-17	2008	4	1	1	4-2008	Fever	11.8458	3. Lake Endemic	MDR86	1. 0 - 5 years
KDH1204832	Kisumu DH	4/30/2012	Kisumu	Female	Kisumu	No		Yes		4	1	No			Headache	3	45	39.7	120	Malaria		42750					Lake Endemic	12	6 - 15 years	wild type/Mutant	Wild type	Wild type	2012-04-30	2012	2	0	0	2-2012	Headache	10.6631	3. Lake Endemic		2. 6 - 15 years
KDH1105627	Kisumu DH	5/10/2011	Kisumu	Female	Kisumu	No		Yes		9	1	No			Fever	2	14	38.5	116	Malaria							Lake Endemic	1	0 - 5 years	Wild type	undetermined	undetermined	2011-05-10	2011	2	0	0	2-2013	Fever		3. Lake Endemic		1. 0 - 5 years
KOM1407285	Kombewa DH	7/1/2014	Kisumu	Female	Kisumu	No		Yes		1	4	Yes	Other	Hospital/Dispensary	Fever		13	39	129	Malaria		102560					Lake Endemic	3	0 - 5 years	Wild type	Wild type	wild type/Mutant	2014-07-01	2014	3	0	0	3-2014	Fever	11.5382	3. Lake Endemic		1. 0 - 5 years
KOM1403175	Kombewa DH	3/6/2014	Kisumu	Female	Kisumu	No		Yes			5	Yes	Other	Hospital/Dispensary	Seizure	2	25	38.9	109	Malaria		73760					Lake Endemic	6	6 - 15 years	Wild type	Wild type	Wild type	2014-03-06	2014	1	0	0	1-2014	Others	11.2086	3. Lake Endemic		2. 6 - 15 years
KDH1102571	Kisumu DH	2/21/2011	Kisumu	Female	Kisumu	No		Yes		2	5	No			Fever	3	19	38	137	Malaria		51750					Lake Endemic	6	6 - 15 years	undetermined	Wild type	undetermined	2011-02-21	2011	1	0	2	1-2011	Fever	10.8542	3. Lake Endemic		2. 6 - 15 years
KDH1202806	Kisumu DH	2/15/2012	Kisumu	Male	Kisumu	No		Yes		5	2	No			Vomiting	7	15	35.6	96	Malaria		40500					Lake Endemic	4	0 - 5 years	wild type/Mutant	Wild type	wild type/Mutant	2012-02-15	2012	1	0	0	1-2012	Others	10.6091	3. Lake Endemic		1. 0 - 5 years
KDH1105634	Kisumu DH	5/18/2011	Kisumu	Female	Kisumu	Yes	1-2 months	Yes		3	1	No			Headache	2	58	36.2	64	Malaria		4500					Lake Endemic	24	Above 15 years	undetermined	wild type/Mutant	undetermined	2011-05-18	2011	2	0	2	2-2013	Headache	8.41183	3. Lake Endemic		3. Above 15 years
KOM1407293	Kombewa DH	7/22/2014	Kisumu	Female	Kisumu	No		Yes		1	3	Yes	Other	Hospital/Dispensary	Fever	3	28	39	117	Malaria		58400					Lake Endemic	10	6 - 15 years	Wild type	Wild type	Mutant	2014-07-22	2014	3	1	0	3-2014	Fever	10.9751	3. Lake Endemic	MDR184	2. 6 - 15 years
KDH1106649	Kisumu DH	6/14/2011	Kisumu	Female	Kisumu	No		Yes		2	3	No			Fever	1	11	35.4	112	Malaria		20250					Lake Endemic	3	0 - 5 years	Wild type	Wild type	undetermined	2011-06-14	2011	2	0	0	2-2013	Fever	9.91591	3. Lake Endemic		1. 0 - 5 years
KDH0910284	Kisumu DH	10/23/2009	Kisumu	Female	Kisumu	No		Yes		6	1	No			Fever	3	11	39.1	108	Malaria		20250					Lake Endemic	1	0 - 5 years	wild type/Mutant	Wild type	Wild type	2009-10-23	2009	4	0	0	4-2009	Fever	9.91591	3. Lake Endemic		1. 0 - 5 years
KOM1407287	Kombewa DH	7/3/2014	Kisumu	Female	Kisumu	No		Yes		2	5	Yes	Artenam	Hospital/Dispensary	Fever	4	10	39.4	130	Malaria		45920					Lake Endemic	2	0 - 5 years	Wild type	Wild type	Mutant	2014-07-03	2014	3	1	0	3-2014	Fever	10.7347	3. Lake Endemic	MDR184	1. 0 - 5 years
KDH0807082	Kisumu DH	7/1/2008	Kisumu	Male	Kisumu	Yes	<2weeks	Yes	2			No			Fever	5	12	38.3	136	Malaria		58500					Lake Endemic	2	0 - 5 years	Mutant	wild type/Mutant	wild type/Mutant	2008-07-01	2008	3	1	1	3-2008	Fever	10.9768	3. Lake Endemic	CRT76	1. 0 - 5 years
KDH1008473	Kisumu DH	8/17/2010	Kisumu	Female	Kisumu	Yes	1-2 months	Yes		1	1	Yes	Quinine	Hospital/Dispensary	Fever	3	23.5	38.8	136	Malaria		135000					Lake Endemic	8	6 - 15 years	Wild type	Wild type	Mutant	2010-08-17	2010	3	1	0	3-2010	Fever	11.813	3. Lake Endemic	MDR184	2. 6 - 15 years
KDH1004410	Kisumu DH	4/30/2010	Kisumu	Male	Kisumu	No		Yes		10	1	No			Fever	1	13.5	38.2	150	Malaria		67500					Lake Endemic	3	0 - 5 years	undetermined	Wild type	Mutant	2010-04-30	2010	2	1	2	2-2010	Fever	11.1199	3. Lake Endemic	MDR184	1. 0 - 5 years
KDH14031351	Kisumu DH	3/13/2014	Kisumu	Male	Kisumu	No		Yes	2		0	No			Fever	1	16	35.9	100	Malaria		22500					Lake Endemic	4	0 - 5 years	Wild type	Wild type	Mutant	2014-03-13	2014	1	1	0	1-2014	Fever	10.0213	3. Lake Endemic	MDR184	1. 0 - 5 years
KDH1101544	Kisumu DH	1/7/2011	Kisumu	Male	Kisumu	Yes	<2weeks	Yes		4	2	No			Fever	1	7.7	37.5	160	Malaria		33750					Lake Endemic	0	0 - 5 years	Wild type	Wild type	Wild type	2011-01-07	2011	1	0	0	1-2011	Fever	10.4267	3. Lake Endemic		1. 0 - 5 years
KDH0806061	Kisumu DH	6/5/2008	Kisumu	Female	Kisumu	No		Yes		4	1	No			Headache	1	57	36.6	86	Malaria		60750					Lake Endemic	18	Above 15 years	wild type/Mutant	Wild type	Wild type	2008-06-05	2008	2	0	0	2-2008	Headache	11.0145	3. Lake Endemic		3. Above 15 years
KDH1102563	Kisumu DH	2/7/2011	Kisumu	Female	Kisumu	No		Yes		5	1	No			Fever	1	13	35.9	130	Malaria		13500					Lake Endemic	2	0 - 5 years	Wild type	Wild type	Wild type	2011-02-07	2011	1	0	0	1-2011	Fever	9.51044	3. Lake Endemic		1. 0 - 5 years
KOM1309057	Kombewa DH	9/16/2013	Kisumu	Female	Kisumu	No		Yes	1		0	No			Fever	7	69.3	37.1	72	RTI	RTI						Lake Endemic	32	Above 15 years	Wild type	wild type/Mutant	wild type/Mutant	2013-09-16	2013	3	0	0	3-2013	Fever		3. Lake Endemic		3. Above 15 years
KDH1011509	Kisumu DH	11/9/2010	Kisumu	Male	Kisumu	Yes	<2weeks	Yes		8	1	No			Stomachache	3	15	36.5	92	Malaria		342000					Lake Endemic	2	0 - 5 years	undetermined	Wild type	Wild type	2010-11-09	2010	4	0	2	4-2010	Others	12.7426	3. Lake Endemic		1. 0 - 5 years
KOM1404214	Kombewa DH	4/22/2014	Kisumu	Male	Kisumu	No		No				No			Fever	2	9.5	39.9	129	Malaria		70720					Lake Endemic	0	0 - 5 years	Wild type	Wild type	Mutant	2014-04-22	2014	2	1	0	2-2014	Fever	11.1665	3. Lake Endemic	MDR184	1. 0 - 5 years
KDH0903196	Kisumu DH	3/31/2009	Kisumu	Female	Kisumu	Yes	1-2 months	Yes	2			No			Vomiting	2	48	35.7	82	Malaria		54000					Lake Endemic	21	Above 15 years	Mutant	Mutant	Mutant	2009-03-31	2009	1	1	1	1-2009	Others	10.8967	3. Lake Endemic	MDR184	3. Above 15 years
KDH1103586	Kisumu DH	3/23/2011	Kisumu	Male	Kisumu	No		Yes		4	3	No			Fever	7	15	39.2	154	Malaria		29250					Lake Endemic	3	0 - 5 years	wild type/Mutant	Wild type	Wild type	2011-03-23	2011	1	0	0	1-2011	Fever	10.2836	3. Lake Endemic		1. 0 - 5 years
KDH0905213	Kisumu DH	5/13/2009	Kisumu	Female	Kisumu	No		Yes		5	4	No			Headache	4	27	36.1	94	Malaria		393750					Lake Endemic	8	6 - 15 years	undetermined	wild type/Mutant	Wild type	2009-05-13	2009	2	0	2	2-2009	Headache	12.8835	3. Lake Endemic		2. 6 - 15 years
KDH1207861	Kisumu DH	7/10/2012	Kisumu	Male	Kisumu	No		Yes		2	4	No			Fever	3	18	36.7	108	Malaria	RTI	94500					Lake Endemic	4	0 - 5 years	wild type/Mutant	Mutant	Wild type	2012-07-10	2012	3	1	0	2-2013	Fever	11.4564	3. Lake Endemic	MDR86	1. 0 - 5 years
KDH0807084	Kisumu DH	7/2/2008	Kisumu	Male	Kisumu	No		Yes	3		0	No			Diarrhea	1	15	36.5	82	Malaria	Gastroenteritis	11250					Lake Endemic	4	0 - 5 years	Mutant	Mutant	Wild type	2008-07-02	2008	3	1	1	3-2008	Others	9.32812	3. Lake Endemic	MDR86	1. 0 - 5 years
KDH0911317	Kisumu DH	11/30/2009	Kisumu	Female	Kisumu	Yes	<2weeks	No				No			Fever	3	9	37.4	112	Malaria		15750					Lake Endemic	2	0 - 5 years	Mutant	Wild type	undetermined	2009-11-30	2009	4	1	1	4-2009	Fever	9.6646	3. Lake Endemic	CRT76	1. 0 - 5 years
KOM1403192	Kombewa DH	3/19/2014	Kisumu	Female	Kisumu	No		Yes		3	4	No			Fever	3	13	37.3	98	Malaria		4800					Lake Endemic	4	0 - 5 years	Wild type	Wild type	Mutant	2014-03-19	2014	1	1	0	1-2014	Fever	8.47637	3. Lake Endemic	MDR184	1. 0 - 5 years
KOM1406250	Kombewa DH	6/3/2014	Kisumu	Male	Kisumu	No		Yes		5	2	No			Fever	3	18	35.8	92	Malaria		111040					Lake Endemic	4	0 - 5 years	Wild type	Wild type	Mutant	2014-06-03	2014	2	1	0	2-2014	Fever	11.6176	3. Lake Endemic	MDR184	1. 0 - 5 years
KDH0910269	Kisumu DH	10/14/2009	Nyando	Female	Kisumu	No		Yes		3	2	No			Fever	12	20	36.5	96	Malaria		6750					Lake Endemic	9	6 - 15 years	wild type/Mutant	Wild type	Wild type	2009-10-14	2009	4	0	0	4-2009	Fever	8.8173	3. Lake Endemic		2. 6 - 15 years
KDH14051407	Kisumu DH	5/19/2014	Kisumu	Male	Kisumu	Yes	2-4 weeks	Yes		5	2	No			Fever	1	14	38.7	136	Malaria		90000					Lake Endemic	3	0 - 5 years	Wild type	Wild type	Wild type	2014-05-19	2014	2	0	0	2-2014	Fever	11.4076	3. Lake Endemic		1. 0 - 5 years
KDH1102574	Kisumu DH	2/24/2011	Kisumu	Male	Kisumu	Yes	2-4 weeks	Yes		2	1	No			Fever	2	8.6	37.2	130	Malaria		141750					Lake Endemic	1	0 - 5 years	undetermined	Mutant	Mutant	2011-02-24	2011	1	1	2	1-2011	Fever	11.8618	3. Lake Endemic	MDR184	1. 0 - 5 years
KDH1101546	Kisumu DH	1/12/2011	Kisumu	Male	Kisumu	No		Yes	2			No			Headache	1	29	37.8	108	Malaria		65250					Lake Endemic	10	6 - 15 years	Wild type	Wild type	wild type/Mutant	2011-01-12	2011	1	0	0	1-2011	Headache	11.086	3. Lake Endemic		2. 6 - 15 years
KDH1006444	Kisumu DH	6/21/2010	Kisumu	Female	Kisumu	No		No				No			Fever	2	20	37.3	104	Malaria		135000					Lake Endemic	7	6 - 15 years	Wild type	Wild type	Mutant	2010-06-21	2010	2	1	0	2-2010	Fever	11.813	3. Lake Endemic	MDR184	2. 6 - 15 years
KDH0806057	Kisumu DH	6/3/2008	Kisumu	Female	Kisumu	No		No				No			Fever	4	16	38.6	86	Malaria		150750					Lake Endemic	4	0 - 5 years	Mutant	wild type/Mutant	Wild type	2008-06-03	2008	2	1	1	2-2008	Fever	11.9234	3. Lake Endemic	CRT76	1. 0 - 5 years
KOM1403174	Kombewa DH	3/5/2014	Kisumu	Female	Kisumu	No		Yes		1	4	No	Other	Hospital/Dispensary	Fever	2	10	38.1	122	Malaria		75640					Lake Endemic	2	0 - 5 years	Wild type	Wild type	Wild type	2014-03-05	2014	1	0	0	1-2014	Fever	11.2337	3. Lake Endemic		1. 0 - 5 years
KOM1404198	Kombewa DH	4/7/2014	Kisumu	Female	Kisumu	No		Yes		2	4	No			Fever	3	14	35.8	91	Malaria		1440			480		Lake Endemic	3	0 - 5 years	Wild type	Wild type	Mutant	2014-04-07	2014	2	1	0	2-2014	Fever	7.2724	3. Lake Endemic	MDR184	1. 0 - 5 years
KDH1005427	Kisumu DH	5/21/2010	Kisumu	Male	Kisumu	No		Yes		2		No			Fever	14	74	37.2	87	Malaria		22500					Lake Endemic	33	Above 15 years	Mutant	Wild type	Wild type	2010-05-21	2010	2	1	1	2-2010	Fever	10.0213	3. Lake Endemic	CRT76	3. Above 15 years
KDH1001326	Kisumu DH	1/7/2010	Kisumu	Female	Kisumu	No		No				No			Fever	14	13	38.1	102	Malaria		15750					Lake Endemic	1	0 - 5 years	Mutant	Mutant	undetermined	2010-01-07	2010	1	1	1	1-2010	Fever	9.6646	3. Lake Endemic	MDR86	1. 0 - 5 years
KDH1206843	Kisumu DH	6/4/2012	Kisumu	Female	Kisumu	No		Yes		6	1	No			Fever	8	8	39	176	Malaria	RTI	20250					Lake Endemic	0	0 - 5 years	wild type/Mutant	Wild type	wild type/Mutant	2012-06-04	2012	2	0	0	2-2012	Fever	9.91591	3. Lake Endemic		1. 0 - 5 years
KDH0906235	Kisumu DH	6/22/2009	Kisumu	Male	Kisumu	Yes	<2weeks	No				No			Vomiting	21	11	36.9	108	Malaria		38250					Lake Endemic	2	0 - 5 years	Mutant	Mutant	Wild type	2009-06-22	2009	2	1	1	2-2009	Others	10.5519	3. Lake Endemic	MDR86	1. 0 - 5 years
KDH0906238	Kisumu DH	6/25/2009	Kisumu	Male	Kisumu	No		Yes		2	4	No			Vomiting	8	17	36.7	132	Malaria		42750					Lake Endemic	4	0 - 5 years	wild type/Mutant	wild type/Mutant	wild type/Mutant	2009-06-25	2009	2	0	0	2-2009	Others	10.6631	3. Lake Endemic		1. 0 - 5 years
KDH1002350	Kisumu DH	2/9/2010	Kisumu	Female	Kisumu	No		Yes		3	1	No			Fever	3	9	39.4	100	Malaria		18000					Lake Endemic	2	0 - 5 years	undetermined	Mutant	Wild type	2010-02-09	2010	1	1	2	1-2010	Fever	9.79813	3. Lake Endemic	MDR86	1. 0 - 5 years
KDH1112762	Kisumu DH	12/14/2011	Kisumu	Female	Kisumu	No		Yes	1		0	No			Fever	1	15	36.4	128	Malaria	RTI	90000					Lake Endemic	2	0 - 5 years	Mutant	Wild type	undetermined	2011-12-14	2011	4	1	1	4-2011	Fever	11.4076	3. Lake Endemic	CRT76	1. 0 - 5 years
KDH0803004	Kisumu DH	3/14/2008	Kisumu	Female	Kisumu	No		Yes		5	2	No			Fever	3	14	37.3		Malaria	RTI	58500					Lake Endemic	3	0 - 5 years	Mutant	Wild type	Wild type	2008-03-14	2008	1	1	1	1-2008	Fever	10.9768	3. Lake Endemic	CRT76	1. 0 - 5 years
KDH1111753	Kisumu DH	11/10/2011	Kisumu	Female	Kisumu	No		No				No			Fever	1	13	39.1	98	Malaria		47250					Lake Endemic	5	0 - 5 years	wild type/Mutant	wild type/Mutant	Mutant	2011-11-10	2011	4	1	0	4-2011	Fever	10.7632	3. Lake Endemic	MDR184	1. 0 - 5 years
KOM1406259	Kombewa DH	6/11/2014	Kisumu	Female	Kisumu	No		Yes		2	4	No			Fever	3	28	37.3	92	Malaria		301440					Lake Endemic	9	6 - 15 years	Wild type	Wild type	Mutant	2014-06-11	2014	2	1	0	2-2014	Fever	12.6163	3. Lake Endemic	MDR184	2. 6 - 15 years
KOM1404201	Kombewa DH	4/9/2014	Kisumu	Female	Kisumu	No		Yes	2		0	No			Fever	2	28	37.4	111	Malaria		147040					Lake Endemic	10	6 - 15 years	Wild type	Wild type	Mutant	2014-04-09	2014	2	1	0	2-2014	Fever	11.8985	3. Lake Endemic	MDR184	2. 6 - 15 years
KDH1001329	Kisumu DH	1/11/2010	Kisumu	Female	Kisumu	Yes	2-4 weeks	Yes		2	2	No			Headache	1	53	38.3	131	Malaria		9000					Lake Endemic	25	Above 15 years	wild type/Mutant	Wild type	Mutant	2010-01-11	2010	1	1	0	1-2010	Headache	9.10498	3. Lake Endemic	MDR184	3. Above 15 years
KDH1201765	Kisumu DH	1/5/2012	Kisumu	Female	Kisumu	No		Yes		3	2	No			Headache	2	16	37.3	124	Malaria		18000					Lake Endemic	4	0 - 5 years	wild type/Mutant	Wild type	Wild type	2012-01-05	2012	1	0	0	1-2012	Headache	9.79813	3. Lake Endemic		1. 0 - 5 years
KDH14031349	Kisumu DH	3/11/2014	Kisumu	Male	Kisumu	No		Yes			7	Yes	Quinine	Hospital/Dispensary	Fever	1	20	36.6	112	Malaria		24750					Lake Endemic	4	0 - 5 years	Wild type	Wild type	Wild type	2014-03-11	2014	1	0	0	1-2014	Fever	10.1166	3. Lake Endemic		1. 0 - 5 years
KDH1012539	Kisumu DH	12/14/2010	Kisumu	Female	Kisumu	No		Yes	1		1	No			Fever	1	12	38.1	150	Malaria		74250					Lake Endemic	4	0 - 5 years	Wild type	Wild type	Wild type	2010-12-14	2010	4	0	0	4-2010	Fever	11.2152	3. Lake Endemic		1. 0 - 5 years
KDH1001325	Kisumu DH	1/6/2010	Kisumu	Male	Kisumu	Yes	2-4 weeks	Yes	1	1		No			Headache	3	79	36.5	64	Malaria		18000					Lake Endemic	28	Above 15 years	wild type/Mutant	Mutant	undetermined	2010-01-06	2010	1	1	0	1-2010	Headache	9.79813	3. Lake Endemic	MDR86	3. Above 15 years
KDH1006442	Kisumu DH	6/14/2010	Kisumu	Female	Kisumu	No		Yes	2			No			Headache	4	24	39.3	160	Malaria		54000					Lake Endemic	0	0 - 5 years	Wild type	Wild type	Mutant	2010-06-14	2010	2	1	0	2-2010	Headache	10.8967	3. Lake Endemic	MDR184	1. 0 - 5 years
KOM1310079	Kombewa DH	10/9/2013	Kisumu	Male	Kisumu	Yes	2-4 weeks	Yes		2	5	No			Fever	3	21	37.9	79	Malaria		61280					Lake Endemic	5	0 - 5 years	Wild type	Wild type	wild type/Mutant	2013-10-09	2013	4	0	0	4-2013	Fever	11.0232	3. Lake Endemic		1. 0 - 5 years
KDH1105625	Kisumu DH	5/10/2011	Kisumu	Male	Kisumu	Yes	<2weeks	Yes	2			No			Headache	2	79	39.7	110	Malaria		13500					Lake Endemic	31	Above 15 years	Mutant	Wild type	Mutant	2011-05-10	2011	2	1	1	2-2013	Headache	9.51044	3. Lake Endemic	MDR184	3. Above 15 years
KDH1104597	Kisumu DH	4/8/2011	Kisumu	Female	Kisumu	Yes	<2weeks	Yes		4	4	No			Fever	1	12	38.1	162	Malaria		78750					Lake Endemic	2	0 - 5 years	wild type/Mutant	Wild type	Mutant	2011-04-08	2011	2	1	0	2-2013	Fever	11.274	3. Lake Endemic	MDR184	1. 0 - 5 years
KDH1001332	Kisumu DH	1/12/2010	Kisumu	Female	Kisumu	Yes	1-2 months	Yes		5	1	No			Headache	3	47	38.7	123	Malaria		11250					Lake Endemic	13	6 - 15 years	wild type/Mutant	Mutant	undetermined	2010-01-12	2010	1	1	0	1-2010	Headache	9.32812	3. Lake Endemic	MDR86	2. 6 - 15 years
KDH1008469	Kisumu DH	8/10/2010	Kisumu	Male	Kisumu	Yes	<2weeks	Yes		4	1	No			Fever	4	9.2	38.4	196	Malaria		15750					Lake Endemic	0	0 - 5 years	wild type/Mutant	Wild type	Wild type	2010-08-10	2010	3	0	0	3-2010	Fever	9.6646	3. Lake Endemic		1. 0 - 5 years
KDH1111758	Kisumu DH	11/21/2011	Kisumu	Male	Kisumu	No		Yes	1	5	0	No			Fever	2	18	39.9	196	Malaria		47250					Lake Endemic	4	0 - 5 years	Wild type	Wild type	wild type/Mutant	2011-11-21	2011	4	0	0	4-2011	Fever	10.7632	3. Lake Endemic		1. 0 - 5 years
KOM1407286	Kombewa DH	7/3/2014	Kisumu	Male	Kisumu	No		Yes		2	3	No			Fever	3	15.5	38	97	Malaria		15200					Lake Endemic	4	0 - 5 years	Wild type	Wild type	Wild type	2014-07-03	2014	3	0	0	3-2014	Fever	9.62905	3. Lake Endemic		1. 0 - 5 years
KOM1404207	Kombewa DH	4/15/2014	Kisumu	Male	Kisumu	No		Yes	1		1	No			Fever	2	10	37.6	123	Malaria		156960					Lake Endemic	1	0 - 5 years	Wild type	Wild type	Mutant	2014-04-15	2014	2	1	0	2-2014	Fever	11.9637	3. Lake Endemic	MDR184	1. 0 - 5 years
KOM1403196	Kombewa DH	3/24/2014	Kisumu	Male	Kisumu	No		Yes			2	Yes	Other	Hospital/Dispensary	Headache	4	67	38.9	69	Malaria		38720					Lake Endemic	27	Above 15 years	Wild type	Wild type	Mutant	2014-03-24	2014	1	1	0	1-2014	Headache	10.5641	3. Lake Endemic	MDR184	3. Above 15 years
KDH1001330	Kisumu DH	1/12/2010	Kisumu	Male	Kisumu	Yes	1-2 months	Yes		3	2	No			Headache	5	37	39.3	116	Malaria		15750					Lake Endemic	13	6 - 15 years	undetermined	Wild type	undetermined	2010-01-12	2010	1	0	2	1-2010	Headache	9.6646	3. Lake Endemic		2. 6 - 15 years
KDH1207875	Kisumu DH	7/20/2012	Kisumu	Female	Kisumu	No		Yes		2	5	No			Fever	1	11	36.3	128	Malaria		27000					Lake Endemic	2	0 - 5 years	Wild type	Mutant	Wild type	2012-07-20	2012	3	1	0	2-2013	Fever	10.2036	3. Lake Endemic	MDR86	1. 0 - 5 years
KDH1104610	Kisumu DH	4/21/2011	Kisumu	Female	Kisumu	Yes	<2weeks	Yes		2	2	No			Fever	1	10.2	39.4	164	Malaria		90000					Lake Endemic	2	0 - 5 years	wild type/Mutant	wild type/Mutant	Wild type	2011-04-21	2011	2	0	0	2-2013	Fever	11.4076	3. Lake Endemic		1. 0 - 5 years
KDH1004391	Kisumu DH	4/12/2010	Kisumu	Female	Kisumu	No		Yes		4	2	No			Fever	3	8	38.7	188	Malaria		15750					Lake Endemic	1	0 - 5 years	Wild type	Mutant	Wild type	2010-04-12	2010	2	1	0	2-2010	Fever	9.6646	3. Lake Endemic	MDR86	1. 0 - 5 years
KDH1205833	Kisumu DH	5/2/2012	Kisumu	Female	Kisumu	Yes	1-2 months	Yes	3		0	No			Fever	6	20	38.5	140	Malaria		11250					Lake Endemic	5	0 - 5 years	wild type/Mutant	Wild type	wild type/Mutant	2012-05-02	2012	2	0	0	2-2012	Fever	9.32812	3. Lake Endemic		1. 0 - 5 years
KDH1206850	Kisumu DH	6/11/2012	Kisumu	Female	Kisumu	No		Yes	1		0	No			Vomiting	1	14	36.6	161	Malaria		69750					Lake Endemic	2	0 - 5 years	Mutant	Wild type	Mutant	2012-06-11	2012	2	1	1	2-2012	Others	11.1527	3. Lake Endemic	MDR184	1. 0 - 5 years
KDH1104619	Kisumu DH	4/29/2011	Kisumu	Male	Kisumu	No		Yes		2	4	No			Headache	1	89	36.7	64	Malaria		54000					Lake Endemic	31	Above 15 years	undetermined	undetermined	Wild type	2011-04-29	2011	2	0	2	2-2013	Headache	10.8967	3. Lake Endemic		3. Above 15 years
KDH0910274	Kisumu DH	10/15/2009	Kisumu	Male	Kisumu	No		Yes		6	1	No			Fever		18	38.2	98	Malaria		31500					Lake Endemic	3	0 - 5 years	Mutant	Mutant	undetermined	2009-10-15	2009	4	1	1	4-2009	Fever	10.3577	3. Lake Endemic	MDR86	1. 0 - 5 years
KOM1403172	Kombewa DH	3/5/2014	Kisumu	Female	Kisumu	No		Yes		2	3	No			Fever	1	15	38.1	114	Malaria		167480					Lake Endemic	3	0 - 5 years	Wild type	Wild type	Wild type	2014-03-05	2014	1	0	0	1-2014	Fever	12.0286	3. Lake Endemic		1. 0 - 5 years
KDH14051400	Kisumu DH	5/13/2014	Kisumu	Female	Kisumu	No		Yes			6	Yes	Other	Hospital/Dispensary	Fever	1	19	38.7	142	Malaria		6750					Lake Endemic	6	6 - 15 years	Wild type	Wild type	wild type/Mutant	2014-05-13	2014	2	0	0	2-2014	Fever	8.8173	3. Lake Endemic		2. 6 - 15 years
KDH14041373	Kisumu DH	4/14/2014	Kisumu	Female	Kisumu	No		Yes		3	2	No			Fever	3	12	38.7	160	Malaria		13500					Lake Endemic	4	0 - 5 years	Wild type	Wild type	Wild type	2014-04-14	2014	2	0	0	2-2014	Fever	9.51044	3. Lake Endemic		1. 0 - 5 years
KDH1101541	Kisumu DH	1/5/2011	Kisumu	Female	Kisumu	No		Yes		3	4	No			Headache	6	4	38.3	136	Malaria		51750					Lake Endemic	13	6 - 15 years	Wild type	undetermined	wild type/Mutant	2011-01-05	2011	1	0	0	1-2011	Headache	10.8542	3. Lake Endemic		2. 6 - 15 years
KOM1405239	Kombewa DH	5/19/2014	Kisumu	Female	Kisumu	No		Yes		3	3	No			Headache	2	45	36.5	81	Malaria		3360					Lake Endemic	49	Above 15 years	Wild type	Wild type	Mutant	2014-05-19	2014	2	1	0	2-2014	Headache	8.1197	3. Lake Endemic	MDR184	3. Above 15 years
KDH1102561	Kisumu DH	2/7/2011	Kisumu	Male	Kisumu	No		Yes		6	1	No			Fever	1	21	35.5	110	Malaria		24750					Lake Endemic	8	6 - 15 years	Wild type	Wild type	Mutant	2011-02-07	2011	1	1	0	1-2011	Fever	10.1166	3. Lake Endemic	MDR184	2. 6 - 15 years
KDH1204822	Kisumu DH	4/4/2012	Kisumu	Female	Kisumu	No		Yes		3	1	No			Fever	2	8	38.3	196	Malaria		15750					Lake Endemic	0	0 - 5 years	undetermined	Wild type	wild type/Mutant	2012-04-04	2012	2	0	2	2-2012	Fever	9.6646	3. Lake Endemic		1. 0 - 5 years
KDH0806062	Kisumu DH	6/6/2008	Kisumu	Male	Kisumu	No		Yes		4	1	No			Headache	2	19	36.7	120	Malaria		326250					Lake Endemic	5	0 - 5 years	Mutant	Wild type	Wild type	2008-06-06	2008	2	1	1	2-2008	Headache	12.6954	3. Lake Endemic	CRT76	1. 0 - 5 years
KDH1110718	Kisumu DH	10/10/2011	Kisumu	Female	Kisumu	No		Yes	1		1	No			Fever	2	18	38.6	112	Malaria		11250					Lake Endemic	4	0 - 5 years	Wild type	Wild type	Wild type	2011-10-10	2011	4	0	0	4-2011	Fever	9.32812	3. Lake Endemic		1. 0 - 5 years
KDH14041380	Kisumu DH	4/22/2014	Kisumu	Female	Kisumu	No		Yes		6	2	No			Fever	3	21	37.5	148	Malaria		40500					Lake Endemic	5	0 - 5 years	Wild type	Wild type	wild type/Mutant	2014-04-22	2014	2	0	0	2-2014	Fever	10.6091	3. Lake Endemic		1. 0 - 5 years
KDH1207870	Kisumu DH	7/18/2012	Kisumu	Male	Kisumu	Yes	2-4 weeks	No				No			Fever	12	12	37.7	152	Malaria	RTI	47250					Lake Endemic	3	0 - 5 years	Mutant	Mutant	Wild type	2012-07-18	2012	3	1	1	2-2013	Fever	10.7632	3. Lake Endemic	MDR86	1. 0 - 5 years
KDH14041384	Kisumu DH	4/29/2014	Kisumu	Female	Kisumu	Yes	<2weeks	Yes	1		0	No			Fever	1	12	38.6	160	Malaria		123750					Lake Endemic	2	0 - 5 years	Mutant	Wild type	Mutant	2014-04-29	2014	2	1	1	2-2014	Fever	11.726	3. Lake Endemic	MDR184	1. 0 - 5 years
KOM1402154	Kombewa DH	2/13/2014	Kisumu	Female	Kisumu	No		Yes		7	2	No			Backache	3	61	37	83	Malaria		4160					Lake Endemic	20	Above 15 years	Wild type	Wild type	wild type/Mutant	2014-02-13	2014	1	0	0	1-2014	Others	8.33327	3. Lake Endemic		3. Above 15 years
KDH1108686	Kisumu DH	8/12/2011	Kisumu	Male	Kisumu	Yes	<2weeks	Yes		4	1	No			Fever	7	11.5	36.6	100	Malaria		148500					Lake Endemic	1	0 - 5 years	Wild type	Wild type	Mutant	2011-08-12	2011	3	1	0	3-2011	Fever	11.9083	3. Lake Endemic	MDR184	1. 0 - 5 years
KDH0912322	Kisumu DH	12/7/2009	Kisumu	Female	Kisumu	No		Yes		4	2	No			Fever	2	27	37.7	164	Malaria		40500					Lake Endemic	10	6 - 15 years	wild type/Mutant	Mutant	Wild type	2009-12-07	2009	4	1	0	4-2009	Fever	10.6091	3. Lake Endemic	MDR86	2. 6 - 15 years
KDH0803003	Kisumu DH	3/13/2008	Kisumu	Male	Kisumu	Yes	2-4 weeks	Yes		2	1	No			Fever	6	20	36.5		Malaria		51750					Lake Endemic	6	6 - 15 years	Mutant	wild type/Mutant	wild type/Mutant	2008-03-13	2008	1	1	1	1-2008	Fever	10.8542	3. Lake Endemic	CRT76	2. 6 - 15 years
KDH1106648	Kisumu DH	6/13/2011	Kisumu	Female	Kisumu	No		Yes		1	1	Yes	Quinine	Hospital/Dispensary	Headache	1	66	36	108	Malaria		18000					Lake Endemic	22	Above 15 years	wild type/Mutant	Wild type	undetermined	2011-06-13	2011	2	0	0	2-2013	Headache	9.79813	3. Lake Endemic		3. Above 15 years
KDH1209883	Kisumu DH	9/11/2012	Kisumu	Female	Kisumu	No		Yes		3	3	No			Fever	1	18	39.2	130	Malaria		11250					Lake Endemic	5	0 - 5 years	undetermined	Wild type	wild type/Mutant	2012-09-11	2012	3	0	2	2-2013	Fever	9.32812	3. Lake Endemic		1. 0 - 5 years
KDH1104613	Kisumu DH	4/27/2011	Kisumu	Male	Kisumu	No		Yes		7	2	No			Seizure	2	12.6	38.1	164	Malaria		69750					Lake Endemic	2	0 - 5 years	wild type/Mutant	wild type/Mutant	Mutant	2011-04-27	2011	2	1	0	2-2013	Others	11.1527	3. Lake Endemic	MDR184	1. 0 - 5 years
KDH14031360	Kisumu DH	3/24/2014	Kisumu	Female	Kisumu	No		Yes	2		0	No			Fever	3	16.8	39.8	164	Malaria							Lake Endemic	5	0 - 5 years	undetermined	wild type/Mutant	Wild type	2014-03-24	2014	1	0	2	1-2014	Fever		3. Lake Endemic		1. 0 - 5 years
KDH0902179	Kisumu DH	2/12/2009	Kisumu	Female	Kisumu	No		Yes	2			No			Fever	6	17	38.4	124	Malaria		45000					Lake Endemic	3	0 - 5 years	Mutant	Mutant	undetermined	2009-02-12	2009	1	1	1	1-2009	Fever	10.7144	3. Lake Endemic	MDR86	1. 0 - 5 years
KOM1404224	Kombewa DH	4/30/2014	Kisumu	Male	Kisumu	No		Yes		1	3	Yes	Other	Hospital/Dispensary	Coughing	2	18	39.1	131	Malaria		48480					Lake Endemic	4	0 - 5 years	Wild type	Wild type	Mutant	2014-04-30	2014	2	1	0	2-2014	Coughing	10.7889	3. Lake Endemic	MDR184	1. 0 - 5 years
KDH1011515	Kisumu DH	11/19/2010	Kisumu	Male	Kisumu	Yes	<2weeks	Yes		4	2	No			Fever	1	13.3	38.8	132	Malaria		6750					Lake Endemic	2	0 - 5 years	undetermined	Mutant	Wild type	2010-11-19	2010	4	1	2	4-2010	Fever	8.8173	3. Lake Endemic	MDR86	1. 0 - 5 years
KDH0906226	Kisumu DH	6/2/2009	Kisumu	Male	Kisumu	Yes	2-4 weeks	Yes		3	2	No			Fever	3	13.8	38.3	110	Malaria		15750					Lake Endemic	3	0 - 5 years	Mutant	Wild type	Wild type	2009-06-02	2009	2	1	1	2-2009	Fever	9.6646	3. Lake Endemic	CRT76	1. 0 - 5 years
KDH1208877	Kisumu DH	8/2/2012	Kisumu	Male	Kisumu	No		Yes		4	2	No			Fever	2	9.5	37.7	152	Malaria	RTI	20250					Lake Endemic	1	0 - 5 years	Wild type	Wild type	Wild type	2012-08-02	2012	3	0	0	2-2013	Fever	9.91591	3. Lake Endemic		1. 0 - 5 years
KDH1107664	Kisumu DH	7/14/2011	Kisumu	Male	Kisumu	Yes		Yes		7	2	No			Headache	1	51	36.1	72	Malaria		1449000					Lake Endemic	24	Above 15 years	Wild type	Mutant	undetermined	2011-07-14	2011	3	1	0	3-2011	Headache	14.1864	3. Lake Endemic	MDR86	3. Above 15 years
KDH1111750	Kisumu DH	11/10/2011	Kisumu	Female	Kisumu	No		Yes		3	1	No			Fever	2	17	40	122	Malaria		270000					Lake Endemic	4	0 - 5 years	Wild type	Mutant	Wild type	2011-11-10	2011	4	1	0	4-2011	Fever	12.5062	3. Lake Endemic	MDR86	1. 0 - 5 years
KDH1207864	Kisumu DH	7/11/2012	Kisumu	Male	Kisumu	No		Yes		2	4	No			Fever	1	13	39.2	152	Malaria		99000					Lake Endemic	3	0 - 5 years	Wild type	Wild type	Wild type	2012-07-11	2012	3	0	0	2-2013	Fever	11.5029	3. Lake Endemic		1. 0 - 5 years
KDH1005415	Kisumu DH	5/4/2010	Kisumu	Female	Kisumu	Yes	2-4 weeks	Yes	3			No			Joint Pains	2	50	36.3	100	Malaria		22500					Lake Endemic	24	Above 15 years	Wild type	Wild type	Wild type	2010-05-04	2010	2	0	0	2-2010	Joint Pains	10.0213	3. Lake Endemic		3. Above 15 years
KDH1207872	Kisumu DH	7/19/2012	Kisumu	Female	Kisumu	No		Yes	3		0	No			Headache	1	55	37.6	96	Malaria	RTI	4500					Lake Endemic	20	Above 15 years	Wild type	Wild type	Wild type	2012-07-19	2012	3	0	0	2-2013	Headache	8.41183	3. Lake Endemic		3. Above 15 years
KDH14031366	Kisumu DH	3/25/2014	Kisumu	Female	Kisumu	Yes	2-4 weeks	Yes		7	2	No			Headache	2	24	35.9	100	Malaria		51750					Lake Endemic	9	6 - 15 years	Wild type	Wild type	Mutant	2014-03-25	2014	1	1	0	1-2014	Headache	10.8542	3. Lake Endemic	MDR184	2. 6 - 15 years
KDH0808106	Kisumu DH	8/26/2008	Kisumu	Female	Kisumu	Yes	<2weeks	Yes		7	1	No			Stomachache	2	63	35.8	62	Malaria		920					Lake Endemic	24	Above 15 years	Wild type	Mutant	Wild type	2008-08-26	2008	3	1	0	3-2008	Others	6.82437	3. Lake Endemic	MDR86	3. Above 15 years
KDH1107665	Kisumu DH	7/14/2011	Kisumu	Female	Kisumu	No		Yes		1	1	Yes	Quinine	Hospital/Dispensary	Fever	9	15	39	144	Malaria		9000					Lake Endemic	2	0 - 5 years	Wild type	Wild type	undetermined	2011-07-14	2011	3	0	0	3-2011	Fever	9.10498	3. Lake Endemic		1. 0 - 5 years
KDH1107674	Kisumu DH	7/25/2011	Kisumu	Female	Kisumu	Yes	<2weeks	Yes		6	4	No			Headache	3	67	37.7	112	Malaria		13500					Lake Endemic	30	Above 15 years	wild type/Mutant	wild type/Mutant	Mutant	2011-07-25	2011	3	1	0	3-2011	Headache	9.51044	3. Lake Endemic	MDR184	3. Above 15 years
KDH1106647	Kisumu DH	6/7/2011	Kisumu	Male	Kisumu	Yes		No				No			Fever	2	14.5	35.8	134	Malaria		63000					Lake Endemic	3	0 - 5 years	Mutant	Wild type	undetermined	2011-06-07	2011	2	1	1	2-2013	Fever	11.0509	3. Lake Endemic	CRT76	1. 0 - 5 years
KDH0910281	Kisumu DH	10/22/2009	Kisumu	Female	Kisumu	No		Yes		3	2	No			Fever	4	21	37	80	Malaria							Lake Endemic	9	6 - 15 years	Mutant	Mutant	Wild type	2009-10-22	2009	4	1	1	4-2009	Fever		3. Lake Endemic	MDR86	2. 6 - 15 years
KDH0805038	Kisumu DH	5/7/2008	Kisumu	Female	Kisumu	Yes	<2weeks	Yes	2			No			Headache	2	54	37	72	Malaria		132750					Lake Endemic	17	Above 15 years	wild type/Mutant	Mutant	Wild type	2008-05-07	2008	2	1	0	2-2008	Headache	11.7962	3. Lake Endemic	MDR86	3. Above 15 years
KDH1207865	Kisumu DH	7/11/2012	Kisumu	Female	Kisumu	No		Yes		2	2	No			Fever	2	10	36.3	128	Malaria	RTI	78750					Lake Endemic	1	0 - 5 years	Mutant	Wild type	Wild type	2012-07-11	2012	3	1	1	2-2013	Fever	11.274	3. Lake Endemic	CRT76	1. 0 - 5 years
KDH1207866	Kisumu DH	7/12/2012	Kisumu	Male	Kisumu	No		Yes		6	3	No			Fever	1	16	37.4	132	Malaria	RTI	45000			600		Lake Endemic	6	6 - 15 years	Wild type	Wild type	wild type/Mutant	2012-07-12	2012	3	0	0	2-2013	Fever	10.7144	3. Lake Endemic		2. 6 - 15 years
KDH14011313	Kisumu DH	1/28/2014	Kisumu	Female	Kisumu	Yes	<2weeks	No				No			Fever	1	11.4	39.1	160	Malaria		11250					Lake Endemic	2	0 - 5 years	Wild type	Wild type	Mutant	2014-01-28	2014	1	1	0	1-2014	Fever	9.32812	3. Lake Endemic	MDR184	1. 0 - 5 years
KDH0807080	Kisumu DH	7/1/2008	Kisumu	Male	Kisumu	Yes	2-4 weeks	Yes		7	5	No			Fever	2	20	39.3	129	Malaria		180000					Lake Endemic	4	0 - 5 years	wild type/Mutant	Wild type	Wild type	2008-07-01	2008	3	0	0	3-2008	Fever	12.1007	3. Lake Endemic		1. 0 - 5 years
KOM1311116	Kombewa DH	11/25/2013	Kisumu	Female	Kisumu	No		Yes		4	3	No			Headache	2	15	36.4	96	Malaria		115040					Lake Endemic	5	0 - 5 years	Wild type	Wild type	Mutant	2013-11-25	2013	4	1	0	4-2013	Headache	11.653	3. Lake Endemic	MDR184	1. 0 - 5 years
KDH1101548	Kisumu DH	1/13/2011	Kisumu	Male	Kisumu	Yes	2-4 weeks	Yes		4	1	No			Fever	1	20	36.9	116	Malaria		42750					Lake Endemic	4	0 - 5 years	undetermined	Mutant	Wild type	2011-01-13	2011	1	1	2	1-2011	Fever	10.6631	3. Lake Endemic	MDR86	1. 0 - 5 years
KOM1405249	Kombewa DH	5/29/2014	Kisumu	Male	Kisumu	No		Yes		2	3	No			Headache	3	29	37.4	94	Malaria		30840					Lake Endemic	10	6 - 15 years	Wild type	Wild type	Wild type	2014-05-29	2014	2	0	0	2-2014	Headache	10.3366	3. Lake Endemic		2. 6 - 15 years
KOM1402153	Kombewa DH	2/11/2014	Kisumu	Male	Kisumu	No		Yes		1	3	Yes	Other	Hospital/Dispensary	Fever	2	9	38.1	123	Malaria		321280					Lake Endemic	2	0 - 5 years	Wild type	Wild type	wild type/Mutant	2014-02-11	2014	1	0	0	1-2014	Fever	12.6801	3. Lake Endemic		1. 0 - 5 years
KDH14031357	Kisumu DH	3/19/2014	Kisumu	Male	Kisumu	Yes	<2weeks	Yes	2		0	No			Fever	2	20.5	38.5	121	Malaria		11250					Lake Endemic	5	0 - 5 years	wild type/Mutant	Wild type	wild type/Mutant	2014-03-19	2014	1	0	0	1-2014	Fever	9.32812	3. Lake Endemic		1. 0 - 5 years
KDH1003383	Kisumu DH	3/22/2010	Kisumu	Male	Kisumu	Yes	2-4 weeks	Yes		3	3	No			Fever	3	16	39.2	132	Malaria		24750					Lake Endemic	9	6 - 15 years	Wild type	Wild type	Wild type	2010-03-22	2010	1	0	0	1-2010	Fever	10.1166	3. Lake Endemic		2. 6 - 15 years
KDH14011270	Kisumu DH	1/9/2014	Kisumu	Male	Kisumu	Yes	<2weeks	Yes	1		0	No			Fever	1	12.5	39.9	176	Malaria		200250					Lake Endemic	2	0 - 5 years	Wild type	Wild type	Mutant	2014-01-09	2014	1	1	0	1-2014	Fever	12.2073	3. Lake Endemic	MDR184	1. 0 - 5 years
KDH1206858	Kisumu DH	6/18/2012	Kisumu	Female	Kisumu	Yes	2-4 weeks	Yes		2	4	No			Vomiting	3	24	37.9	128	Malaria		72000					Lake Endemic	6	6 - 15 years	Mutant	Wild type	Mutant	2012-06-18	2012	2	1	1	2-2012	Others	11.1844	3. Lake Endemic	MDR184	2. 6 - 15 years
KDH1107660	Kisumu DH	7/11/2011	Kisumu	Female	Kisumu	No		Yes	1	2		No			Fever	2	15	38.9	120	Malaria		135000					Lake Endemic	5	0 - 5 years	wild type/Mutant	wild type/Mutant	undetermined	2011-07-11	2011	3	0	0	3-2011	Fever	11.813	3. Lake Endemic		1. 0 - 5 years
KDH0809123	Kisumu DH	9/10/2008	Kisumu	Male	Kisumu	Yes	1-2 months	Yes		4	2	No			Fever	3	16	39	100	Malaria		229500					Lake Endemic	4	0 - 5 years	Mutant	Wild type	Wild type	2008-09-10	2008	3	1	1	3-2008	Fever	12.3437	3. Lake Endemic	CRT76	1. 0 - 5 years
KDH1105629	Kisumu DH	5/11/2011	Kisumu	Male	Kisumu	Yes	<2weeks	Yes		3	1	No			Fever	1	11	36.1	156	Malaria		38250					Lake Endemic	1	0 - 5 years	Mutant	Wild type	undetermined	2011-05-11	2011	2	1	1	2-2013	Fever	10.5519	3. Lake Endemic	CRT76	1. 0 - 5 years
KDH0911310	Kisumu DH	11/26/2009	Kisumu	Male	Kisumu	Yes	2-4 weeks	Yes		5	2	No			Fever	4	7.6	36.7	140	Malaria		51750					Lake Endemic	0	0 - 5 years	Mutant	undetermined	Wild type	2009-11-26	2009	4	1	1	4-2009	Fever	10.8542	3. Lake Endemic	CRT76	1. 0 - 5 years
KOM1310089	Kombewa DH	10/22/2013	Kisumu	Female	Kisumu	No		Yes		4	5	No			Coughing	3	10.5	37.3	113	Malaria		50440					Lake Endemic	2	0 - 5 years	Wild type	Wild type	Wild type	2013-10-22	2013	4	0	0	4-2013	Coughing	10.8285	3. Lake Endemic		1. 0 - 5 years
KDH1107667	Kisumu DH	7/18/2011	Kisumu	Male	Kisumu	No		Yes		4	2	No			Diarrhea	3	22	37.2	124	Malaria		4500					Lake Endemic	6	6 - 15 years	Mutant	Wild type	undetermined	2011-07-18	2011	3	1	1	3-2011	Others	8.41183	3. Lake Endemic	CRT76	2. 6 - 15 years
KDH14051386	Kisumu DH	5/6/2014	Kisumu	Male	Kisumu	No		Yes		4	2	No			Fever	3	22	37.5	134	Malaria		72000					Lake Endemic	5	0 - 5 years	Wild type	Wild type	Wild type	2014-05-06	2014	2	0	0	2-2014	Fever	11.1844	3. Lake Endemic		1. 0 - 5 years
KDH1107668	Kisumu DH	7/18/2011	Kisumu	Female	Kisumu	No		Yes		3	3	No			Fever	3	15	39.2	144	Malaria		27000					Lake Endemic	3	0 - 5 years	Wild type	wild type/Mutant	undetermined	2011-07-18	2011	3	0	0	3-2011	Fever	10.2036	3. Lake Endemic		1. 0 - 5 years
KDH1005414	Kisumu DH	5/4/2010	Kisumu	Female	Kisumu	Yes	2-4 weeks	Yes		2	1	No			Fever	1	10	39.3	140	Malaria		33750					Lake Endemic	1	0 - 5 years	Wild type	Wild type	Mutant	2010-05-04	2010	2	1	0	2-2010	Fever	10.4267	3. Lake Endemic	MDR184	1. 0 - 5 years
KDH14031346	Kisumu DH	3/10/2014	Kisumu	Female	Kisumu	No		Yes			5	Yes	Quinine	Hospital/Dispensary	Vomiting	4	37	36.4	95	Malaria		33750					Lake Endemic	12	6 - 15 years	Mutant	Wild type	Mutant	2014-03-10	2014	1	1	1	1-2014	Others	10.4267	3. Lake Endemic	MDR184	2. 6 - 15 years
KOM1309068	Kombewa DH	9/25/2013	Kisumu	Male	Kisumu	Yes	1-2 months	Yes		8	3	No			Fever	3	32	38.1	97	Malaria		1040					Lake Endemic	9	6 - 15 years	wild type/Mutant	Wild type	wild type/Mutant	2013-09-25	2013	3	0	0	3-2013	Fever	6.94698	3. Lake Endemic		2. 6 - 15 years
KDH1205842	Kisumu DH	5/31/2012	Kisumu	Male	Kisumu	Yes	1-2 months	Yes	1		0	No			Fever	21	16	36.4	120	Malaria		27000					Lake Endemic	4	0 - 5 years	Mutant	Mutant	undetermined	2012-05-31	2012	2	1	1	2-2012	Fever	10.2036	3. Lake Endemic	MDR86	1. 0 - 5 years
KDH1206851	Kisumu DH	6/11/2012	Kisumu	Male	Kisumu	No		Yes		4	3	No			Fever	2	13	35.6	112	Malaria		78750					Lake Endemic	4	0 - 5 years	wild type/Mutant	Wild type	undetermined	2012-06-11	2012	2	0	0	2-2012	Fever	11.274	3. Lake Endemic		1. 0 - 5 years
KDH0906225	Kisumu DH	6/2/2009	Kisumu	Female	Kisumu	No		Yes				No			Stomachache	3	20	38.9	133	Malaria		220500					Lake Endemic	6	6 - 15 years	wild type/Mutant	Wild type	Mutant	2009-06-02	2009	2	1	0	2-2009	Others	12.3037	3. Lake Endemic	MDR184	2. 6 - 15 years
KDH14051397	Kisumu DH	5/13/2014	Kisumu	Male	Kisumu	No		Yes		9	1	No			Fever	1	19	39.1	149	Malaria		29250					Lake Endemic	4	0 - 5 years	wild type/Mutant	Wild type	wild type/Mutant	2014-05-13	2014	2	0	0	2-2014	Fever	10.2836	3. Lake Endemic		1. 0 - 5 years
KDH1109700	Kisumu DH	9/6/2011	Kisumu	Female	Kisumu	No		Yes		6	1	No			Fever	3	13	39.7	164	Malaria		184500					Lake Endemic	3	0 - 5 years	wild type/Mutant	wild type/Mutant	Mutant	2011-09-06	2011	3	1	0	3-2011	Fever	12.1254	3. Lake Endemic	MDR184	1. 0 - 5 years
KDH1108684	Kisumu DH	8/10/2011	Kisumu	Female	Kisumu	No		Yes		6	1	No			Headache	3	60	36.7	80	Malaria		13500					Lake Endemic	2	0 - 5 years	Wild type	undetermined	undetermined	2011-08-10	2011	3	0	0	3-2011	Headache	9.51044	3. Lake Endemic		1. 0 - 5 years
KDH1201785	Kisumu DH	1/19/2012	Kisumu	Female	Kisumu	No		Yes		3	3	No			Headache	3	60	38.3	112	Malaria	RTI	605250					Lake Endemic	24	Above 15 years	wild type/Mutant	Wild type	Mutant	2012-01-19	2012	1	1	0	1-2012	Headache	13.3134	3. Lake Endemic	MDR184	3. Above 15 years
KDH1104604	Kisumu DH	4/18/2011	Kisumu	Male	Kisumu	No		Yes		8	2	No			Diarrhea	1	12.4	36.1	156	Malaria		47250					Lake Endemic	4	0 - 5 years	wild type/Mutant	wild type/Mutant	Mutant	2011-04-18	2011	2	1	0	2-2013	Others	10.7632	3. Lake Endemic	MDR184	1. 0 - 5 years
KDH1111741	Kisumu DH	11/2/2011	Kisumu	Male	Kisumu	No		Yes		2	1	No			Fever	1	12	37.2	92	Malaria		92250					Lake Endemic	2	0 - 5 years	Mutant	Wild type	undetermined	2011-11-02	2011	4	1	1	4-2011	Fever	11.4323	3. Lake Endemic	CRT76	1. 0 - 5 years
KDH1205839	Kisumu DH	5/29/2012	Kisumu	Female	Kisumu	Yes	1-2 months	Yes		4	2	No			Headache	3	58	36.6	108	Malaria		45000					Lake Endemic	19	Above 15 years	wild type/Mutant	wild type/Mutant	wild type/Mutant	2012-05-29	2012	2	0	0	2-2012	Headache	10.7144	3. Lake Endemic		3. Above 15 years
KDH1008467	Kisumu DH	8/9/2010	Kisumu	Female	Kisumu	Yes	<2weeks	Yes		3	2	No			Fever	5	19	36	129	Malaria		36000					Lake Endemic	5	0 - 5 years	Mutant	Wild type	Wild type	2010-08-09	2010	3	1	1	3-2010	Fever	10.4913	3. Lake Endemic	CRT76	1. 0 - 5 years
KDH0910267	Kisumu DH	10/7/2009	Kisumu	Female	Kisumu	Yes	2-4 weeks	Yes		2	3	No			Fever	7	55	36.5	76			193500					Lake Endemic	21	Above 15 years	wild type/Mutant	wild type/Mutant	Wild type	2009-10-07	2009	4	0	0	4-2009	Fever	12.173	3. Lake Endemic		3. Above 15 years
KDH1107662	Kisumu DH	7/14/2011	Kisumu	Male	Kisumu	No		No				No			Fever	3	7.2	37.2	156	Malaria		157500					Lake Endemic	0	0 - 5 years	Wild type	Wild type	undetermined	2011-07-14	2011	3	0	0	3-2011	Fever	11.9672	3. Lake Endemic		1. 0 - 5 years
KDH1103585	Kisumu DH	3/23/2011	Kisumu	Female	Kisumu	No		Yes		3	5	No			Headache	2	62	36	106	Malaria		9000					Lake Endemic	18	Above 15 years	wild type/Mutant	Wild type	Wild type	2011-03-23	2011	1	0	0	1-2011	Headache	9.10498	3. Lake Endemic		3. Above 15 years
KDH0905216	Kisumu DH	5/20/2009	Kisumu	Female	Kisumu	No		Yes	2			No			Headache	1	46	37.5	92	Malaria		31500					Lake Endemic	14	6 - 15 years	Mutant	Wild type	Wild type	2009-05-20	2009	2	1	1	2-2009	Headache	10.3577	3. Lake Endemic	CRT76	2. 6 - 15 years
KOM1402144	Kombewa DH	2/4/2014	Kisumu	Male	Kisumu	No		Yes		1	3	Yes	Other	Hospital/Dispensary	Headache	2	74	37.9	79	Malaria		14560					Lake Endemic	32	Above 15 years	Wild type	Wild type	Wild type	2014-02-04	2014	1	0	0	1-2014	Headache	9.58603	3. Lake Endemic		3. Above 15 years
KDH14071457	Kisumu DH	7/31/2014	Kisumu	Female	Kisumu	Yes	<2weeks	No				No			Fever	2	8.5	37.6	164	Malaria		47250					Lake Endemic	1	0 - 5 years	Wild type	Wild type	Mutant	2014-07-31	2014	3	1	0	3-2014	Fever	10.7632	3. Lake Endemic	MDR184	1. 0 - 5 years
KDH1010499	Kisumu DH	10/6/2010	Kisumu	Female	Kisumu	No		Yes		3	2	No			Fever	1	11	37.7	160	Malaria		78750					Lake Endemic	1	0 - 5 years	undetermined	Wild type	Mutant	2010-10-06	2010	4	1	2	4-2010	Fever	11.274	3. Lake Endemic	MDR184	1. 0 - 5 years
KDH1205837	Kisumu DH	5/11/2012	Kisumu	Female	Kisumu	No		Yes		3	2	No			Vomiting	5	61	38.1	136	Malaria		9000					Lake Endemic	26	Above 15 years	undetermined	Wild type	undetermined	2012-05-11	2012	2	0	2	2-2012	Others	9.10498	3. Lake Endemic		3. Above 15 years
KDH1201790	Kisumu DH	1/26/2012	Kisumu	Male	Kisumu	No		Yes		11	1	No				2	15	35.9	128	Malaria	RTI	195750					Lake Endemic	3	0 - 5 years	Mutant	wild type/Mutant	Wild type	2012-01-26	2012	1	1	1	1-2012		12.1846	3. Lake Endemic	CRT76	1. 0 - 5 years
KOM1404213	Kombewa DH	4/17/2014	Kisumu	Male	Kisumu	No		Yes		2	1	No			Fever	4	12	39.9	100	Malaria		9600					Lake Endemic	4	0 - 5 years	Wild type	Wild type	wild type/Mutant	2014-04-17	2014	2	0	0	2-2014	Fever	9.16952	3. Lake Endemic		1. 0 - 5 years
KOM1312122	Kombewa DH	12/17/2013	Kisumu	Male	Kisumu	No		Yes		3	4	No			Fever	2	10	38.5	121	Malaria		51280					Lake Endemic	1	0 - 5 years	Wild type	Wild type	wild type/Mutant	2013-12-17	2013	4	0	0	4-2013	Fever	10.8451	3. Lake Endemic		1. 0 - 5 years
KDH0804031	Kisumu DH	4/21/2008	Kisumu	Male	Kisumu	No		Yes		5	2	No			Fever	1	12.3	39.6	150	Malaria		5360					Lake Endemic	2	0 - 5 years	Mutant	wild type/Mutant	Wild type	2008-04-21	2008	2	1	1	2-2008	Fever	8.58672	3. Lake Endemic	CRT76	1. 0 - 5 years
KDH1109704	Kisumu DH	9/8/2011	Kisumu	Male	Kisumu	Yes	2-4 weeks	Yes	2	4		No			Fever	1	12	38.3	140	Malaria		114750					Lake Endemic	2	0 - 5 years	wild type/Mutant	Wild type	Wild type	2011-09-08	2011	3	0	0	3-2011	Fever	11.6505	3. Lake Endemic		1. 0 - 5 years
KDH14081458	Kisumu DH	8/7/2014	Kisumu	Male	Kisumu	Yes	2-4 weeks	Yes		5	1	No			Fever	3	14	40.5	176	Malaria		47250					Lake Endemic	2	0 - 5 years	Wild type	Wild type	Wild type	2014-08-07	2014	3	0	0	3-2014	Fever	10.7632	3. Lake Endemic		1. 0 - 5 years
KDH1107658	Kisumu DH	7/11/2011	Kisumu	Male	Kisumu	No		Yes	2			No			Fever	2	19	38.7	146	Malaria		189000					Lake Endemic	44	Above 15 years	wild type/Mutant	wild type/Mutant	undetermined	2011-07-11	2011	3	0	0	3-2011	Fever	12.1495	3. Lake Endemic		3. Above 15 years
KDH0804034	Kisumu DH	4/25/2008	Rachuonyo	Female	Homa Bay	No		Yes		6	1	No			Fever	4	18.5	37.6	133	Malaria		29250					Lake Endemic	4	0 - 5 years	Mutant	Mutant	Wild type	2008-04-25	2008	2	1	1	2-2008	Fever	10.2836	3. Lake Endemic	MDR86	1. 0 - 5 years
KOM1310084	Kombewa DH	10/14/2013	Kisumu	Female	Kisumu	No		Yes		3	7	No			Coughing	2	30	37.1	101	Glardiasis	Glardiasis						Lake Endemic	10	6 - 15 years	undetermined	wild type/Mutant	Wild type	2013-10-14	2013	4	0	2	4-2013	Coughing		3. Lake Endemic		2. 6 - 15 years
KDH1011514	Kisumu DH	11/18/2010	Kisumu	Male	Kisumu	No		Yes		4	5	No			Vomiting	7	9.2	36.3	116	Malaria		22500					Lake Endemic	1	0 - 5 years	undetermined	Wild type	wild type/Mutant	2010-11-18	2010	4	0	2	4-2010	Others	10.0213	3. Lake Endemic		1. 0 - 5 years
KOM1405247	Kombewa DH	5/26/2014	Kisumu	Male	Kisumu	No		Yes		1	5	Yes	Other	Hospital/Dispensary	Headache	3	22	39.3	123	Malaria		358400					Lake Endemic	6	6 - 15 years	Wild type	Wild type	wild type/Mutant	2014-05-26	2014	2	0	0	2-2014	Headache	12.7894	3. Lake Endemic		2. 6 - 15 years
KDH0907249	Kisumu DH	7/22/2009	Kisumu	Male	Kisumu	No		No				No			Fever	2	55	39.5	96	Malaria		29250					Lake Endemic	18	Above 15 years	Mutant	wild type/Mutant	undetermined	2009-07-22	2009	3	1	1	3-2009	Fever	10.2836	3. Lake Endemic	CRT76	3. Above 15 years
KDH0911314	Kisumu DH	11/30/2009	Kisumu	Female	Kisumu	No		Yes		7	1	No			Fever	1	15.8	38.1	132	Malaria		85500					Lake Endemic	3	0 - 5 years	wild type/Mutant	Wild type	Wild type	2009-11-30	2009	4	0	0	4-2009	Fever	11.3563	3. Lake Endemic		1. 0 - 5 years
KDH0902186	Kisumu DH	2/23/2009	Kisumu	Male	Kisumu	Yes	2-4 weeks	Yes			1	Yes	Quinine	Hospital/Dispensary	Fever	2	15.5	36.6	138	Malaria		67500					Lake Endemic	3	0 - 5 years	Mutant	wild type/Mutant	Mutant	2009-02-23	2009	1	1	1	1-2009	Fever	11.1199	3. Lake Endemic	MDR184	1. 0 - 5 years
KDH1206848	Kisumu DH	6/8/2012	Kisumu	Female	Kisumu	No		Yes		3	3	No			Fever	2	12	36.5	128	Malaria	RTI	72000					Lake Endemic	2	0 - 5 years	wild type/Mutant	Wild type	Wild type	2012-06-08	2012	2	0	0	2-2012	Fever	11.1844	3. Lake Endemic		1. 0 - 5 years
KDH1009492	Kisumu DH	9/22/2010	Kisumu	Female	Kisumu	No		Yes		2	5	No			Fever	2	15	35.5	124			67500					Lake Endemic	4	0 - 5 years	undetermined	Wild type	wild type/Mutant	2010-09-22	2010	3	0	2	3-2010	Fever	11.1199	3. Lake Endemic		1. 0 - 5 years
KOM1403178	Kombewa DH	3/6/2014	Kisumu	Male	Kisumu	Yes		Yes		2	3	No			Fever	5	9	38.3	123	Malaria		97280					Lake Endemic	1	0 - 5 years	Wild type	Wild type	wild type/Mutant	2014-03-06	2014	1	0	0	1-2014	Fever	11.4853	3. Lake Endemic		1. 0 - 5 years
KDH1003365	Kisumu DH	3/10/2010	Kisumu	Female	Kisumu	No		Yes		6	1	No			Fever	6	19	37.4	109	Malaria		15750					Lake Endemic	6	6 - 15 years	Wild type	Wild type	Wild type	2010-03-10	2010	1	0	0	1-2010	Fever	9.6646	3. Lake Endemic		2. 6 - 15 years
KDH0911292	Kisumu DH	11/10/2009	Kisumu	Female	Kisumu	No		Yes		9	2	No			Headache	2	69	39.5	69	Malaria		22500					Lake Endemic	18	Above 15 years	Mutant	Mutant	Wild type	2009-11-10	2009	4	1	1	4-2009	Headache	10.0213	3. Lake Endemic	MDR86	3. Above 15 years
KDH1105626	Kisumu DH	5/10/2011	Kisumu	Female	Kisumu	Yes	2-4 weeks	Yes		8	1	No			Fever	1	12.2	38.3	124	Malaria		45000					Lake Endemic	3	0 - 5 years	Mutant	Wild type	Wild type	2011-05-10	2011	2	1	1	2-2013	Fever	10.7144	3. Lake Endemic	CRT76	1. 0 - 5 years
KDH0805036	Kisumu DH	5/5/2008	Kisumu	Male	Kisumu	Yes	2-4 weeks	Yes		1	1	Yes	Artenam		Fever	3	13	38.7	140	Malaria		47250					Lake Endemic	2	0 - 5 years	Mutant	Wild type	Wild type	2008-05-05	2008	2	1	1	2-2008	Fever	10.7632	3. Lake Endemic	CRT76	1. 0 - 5 years
KDH0911302	Kisumu DH	11/23/2009	Kisumu	Female	Kisumu	No		Yes	4			No			Headache	2	20	39.7	119	Malaria		72000					Lake Endemic	6	6 - 15 years	wild type/Mutant	Wild type	Wild type	2009-11-23	2009	4	0	0	4-2009	Headache	11.1844	3. Lake Endemic		2. 6 - 15 years
KDH14041374	Kisumu DH	4/14/2014	Kisumu	Female	Kisumu	Yes	1-2 months	No				No			Fever	3	8	39.1	160	Malaria		128250					Lake Endemic	0	0 - 5 years	Wild type	Wild type	Mutant	2014-04-14	2014	2	1	0	2-2014	Fever	11.7617	3. Lake Endemic	MDR184	1. 0 - 5 years
KDH1202815	Kisumu DH	2/28/2012	Kisumu	Male	Kisumu	Yes	1-2 months	Yes		6	4	No			Fever	5	11	38.5	148	Malaria	RTI						Lake Endemic	1	0 - 5 years	Mutant	Wild type	wild type/Mutant	2012-02-28	2012	1	1	1	1-2012	Fever		3. Lake Endemic	CRT76	1. 0 - 5 years
KDH1109707	Kisumu DH	9/19/2011	Kisumu	Male	Kisumu	Yes	1-2 months	Yes		5	2	No			Diarrhea	3	33	38.6	112	Malaria		90000					Lake Endemic	11	6 - 15 years	Wild type	Mutant	Wild type	2011-09-19	2011	3	1	0	3-2011	Others	11.4076	3. Lake Endemic	MDR86	2. 6 - 15 years
KDH1203820	Kisumu DH	3/19/2012	Kisumu	Male	Kisumu	No		Yes		1	1	Yes	Quinine	Hospital/Dispensary	Fever	1	12	39.7	172	Malaria		283500					Lake Endemic	2	0 - 5 years	wild type/Mutant	Wild type	Mutant	2012-03-19	2012	1	1	0	1-2012	Fever	12.555	3. Lake Endemic	MDR184	1. 0 - 5 years
KDH1204827	Kisumu DH	4/23/2012	Kisumu	Male	Kisumu	No		Yes		2	2	No			Fever	4	17	39.7	180	Malaria	RTI	83250					Lake Endemic	3	0 - 5 years	Wild type	Wild type	Mutant	2012-04-23	2012	2	1	0	2-2012	Fever	11.3296	3. Lake Endemic	MDR184	1. 0 - 5 years
KDH0809132	Kisumu DH	9/23/2008	Kisumu	Female	Kisumu	No		Yes		3	4	No			Fever	1	21	39.5	150	Malaria		243000					Lake Endemic	5	0 - 5 years	Mutant	Wild type	Wild type	2008-09-23	2008	3	1	1	3-2008	Fever	12.4008	3. Lake Endemic	CRT76	1. 0 - 5 years
KDH1202817	Kisumu DH	2/29/2012	Kisumu	Male	Kisumu	No		Yes	2		0	No			Headache	14	67	39.8	98	Malaria	RTI	578250					Lake Endemic	30	Above 15 years	wild type/Mutant	Wild type	wild type/Mutant	2012-02-29	2012	1	0	0	1-2012	Headache	13.2678	3. Lake Endemic		3. Above 15 years
KDH0911296	Kisumu DH	11/12/2009	Kisumu	Male	Kisumu	No		Yes		5	3	No			Fever	2	24	37.5	14	Malaria		27000					Lake Endemic	9	6 - 15 years	wild type/Mutant	Mutant	Wild type	2009-11-12	2009	4	1	0	4-2009	Fever	10.2036	3. Lake Endemic	MDR86	2. 6 - 15 years
KDH0905224	Kisumu DH	5/27/2009	Kisumu	Male	Kisumu	Yes	<2weeks	Yes		4	1	No			Fever	2	15	38.8	80	Malaria		94500					Lake Endemic	3	0 - 5 years	Mutant	Mutant	Wild type	2009-05-27	2009	2	1	1	2-2009	Fever	11.4564	3. Lake Endemic	MDR86	1. 0 - 5 years
KDH14041371	Kisumu DH	4/10/2014	Kisumu	Female	Kisumu	No		Yes	2		0	No			Fever	6	17.3	38	160	Malaria		83250					Lake Endemic	3	0 - 5 years	Wild type	Wild type	Mutant	2014-04-10	2014	2	1	0	2-2014	Fever	11.3296	3. Lake Endemic	MDR184	1. 0 - 5 years
KOM1406278	Kombewa DH	6/26/2014	Kisumu	Male	Kisumu	No		Yes		4	1	No			Headache	2	65	37.3	71	Malaria		7680					Lake Endemic	20	Above 15 years	Wild type	Wild type	Mutant	2014-06-26	2014	2	1	0	2-2014	Headache	8.94637	3. Lake Endemic	MDR184	3. Above 15 years
KDH14021323	Kisumu DH	2/7/2014	Kisumu	Female	Kisumu	Yes	2-4 weeks	Yes	3		0	No			Headache	4	52	38	101	Malaria		333000					Lake Endemic	28	Above 15 years	Wild type	Wild type	Mutant	2014-02-07	2014	1	1	0	1-2014	Headache	12.7159	3. Lake Endemic	MDR184	3. Above 15 years
KDH1104616	Kisumu DH	4/27/2011	Kisumu	Male	Kisumu	No		No				No			Fever	3	8	38	155	Malaria		51750					Lake Endemic	0	0 - 5 years	Mutant	Wild type	Mutant	2011-04-27	2011	2	1	1	2-2013	Fever	10.8542	3. Lake Endemic	MDR184	1. 0 - 5 years
KDH1002353	Kisumu DH	2/9/2010	Kisumu	Male	Kisumu	No		Yes		5	1	No			Fever	2	16	39.8	110	Malaria		49500					Lake Endemic	5	0 - 5 years	wild type/Mutant	wild type/Mutant	undetermined	2010-02-09	2010	1	0	0	1-2010	Fever	10.8097	3. Lake Endemic		1. 0 - 5 years
KDH1011518	Kisumu DH	11/22/2010	Kisumu	Female	Kisumu	No		Yes		8	1	No			Vomiting	1	10	36.8	146	Malaria		15750					Lake Endemic	2	0 - 5 years	Wild type	Wild type	Mutant	2010-11-22	2010	4	1	0	4-2010	Others	9.6646	3. Lake Endemic	MDR184	1. 0 - 5 years
KOM1407289	Kombewa DH	7/10/2014	Kisumu	Male	Kisumu	No		Yes		6	2	No			Fever	4	17	38	137			13760					Lake Endemic	4	0 - 5 years	Wild type	Wild type	Wild type	2014-07-10	2014	3	0	0	3-2014	Fever	9.52952	3. Lake Endemic		1. 0 - 5 years
KDH1110720	Kisumu DH	10/10/2011	Kisumu	Female	Kisumu	No		No				No			Fever	1	10	39	118	Malaria		9000					Lake Endemic	3	0 - 5 years	Wild type	wild type/Mutant	Mutant	2011-10-10	2011	4	1	0	4-2011	Fever	9.10498	3. Lake Endemic	MDR184	1. 0 - 5 years
KDH14031364	Kisumu DH	3/25/2014	Kisumu	Male	Kisumu	No		Yes		2	3	No			Headache	2	18	36.6	144	Malaria		103500					Lake Endemic	7	6 - 15 years	Wild type	Wild type	wild type/Mutant	2014-03-25	2014	1	0	0	1-2014	Headache	11.5473	3. Lake Endemic		2. 6 - 15 years
KOM1407294	Kombewa DH	7/22/2014	Kisumu	Male	Kisumu	No		Yes		1	4	Yes	Other	Pharmacist	Fever	1	15	37.7	100	Malaria		38720					Lake Endemic	5	0 - 5 years	Wild type	Wild type	Mutant	2014-07-22	2014	3	1	0	3-2014	Fever	10.5641	3. Lake Endemic	MDR184	1. 0 - 5 years
KDH0803015	Kisumu DH	3/28/2008	Kisumu	Male	Kisumu	Yes	1-2 months	Yes		1	5	Yes	Quinine	Hospital/Dispensary	Fever	1	12	38.8	155	Malaria		191250					Lake Endemic	1	0 - 5 years	Mutant	Mutant	Mutant	2008-03-28	2008	1	1	1	1-2008	Fever	12.1613	3. Lake Endemic	MDR184	1. 0 - 5 years
KOM1404210	Kombewa DH	4/16/2014	Kisumu	Male	Kisumu	No		Yes	2			No			Vomiting	3	14.5	37.9	111	Malaria		232000					Lake Endemic	3	0 - 5 years	Wild type	Wild type	Wild type	2014-04-16	2014	2	0	0	2-2014	Others	12.3545	3. Lake Endemic		1. 0 - 5 years
KDH1111745	Kisumu DH	11/3/2011	Kisumu	Female	Kisumu	No		Yes		2	1	No			Fever	2	10	37.6	88	Malaria		33750					Lake Endemic	1	0 - 5 years	Mutant	Wild type	Mutant	2011-11-03	2011	4	1	1	4-2011	Fever	10.4267	3. Lake Endemic	MDR184	1. 0 - 5 years
KDH1101557	Kisumu DH	1/24/2011	Kisumu	Female	Kisumu	No		Yes		4	2	No			Fever	2	9.5	36.7	132	Malaria		6750					Lake Endemic	1	0 - 5 years	Wild type	Wild type	Wild type	2011-01-24	2011	1	0	0	1-2011	Fever	8.8173	3. Lake Endemic		1. 0 - 5 years
KDH1111748	Kisumu DH	11/9/2011	Kisumu	Male	Kisumu	No		No				No			Fever	3	22	37.8	92	Malaria		6750					Lake Endemic	7	6 - 15 years	wild type/Mutant	wild type/Mutant	Mutant	2011-11-09	2011	4	1	0	4-2011	Fever	8.8173	3. Lake Endemic	MDR184	2. 6 - 15 years
KDH1103589	Kisumu DH	3/24/2011	Kisumu	Female	Kisumu	Yes	1-2 months	Yes			1	No			Fever	7	16	37.7	192	Malaria		54000					Lake Endemic	4	0 - 5 years	wild type/Mutant	Wild type	Wild type	2011-03-24	2011	1	0	0	1-2011	Fever	10.8967	3. Lake Endemic		1. 0 - 5 years
KDH14011289	Kisumu DH	1/15/2014	Kisumu	Female	Kisumu	Yes	<2weeks	Yes		5	1	No			Fever	2	65	39	102	Malaria		501750					Lake Endemic	25	Above 15 years	Wild type	Wild type	Mutant	2014-01-15	2014	1	1	0	1-2014	Fever	13.1259	3. Lake Endemic	MDR184	3. Above 15 years
KDH1202807	Kisumu DH	2/15/2012	Kisumu	Female	Kisumu	No		Yes		2	3	No			Vomiting	1	11	38.1	154	Malaria		123750					Lake Endemic	3	0 - 5 years	Mutant	Wild type	wild type/Mutant	2012-02-15	2012	1	1	1	1-2012	Others	11.726	3. Lake Endemic	CRT76	1. 0 - 5 years
KOM1312118	Kombewa DH	12/10/2013	Kisumu	Female	Kisumu	Yes	2-4 weeks	Yes		4	3	No			Coughing	2	19	37.5	91	Malaria	RTI						Lake Endemic	4	0 - 5 years	Wild type	wild type/Mutant	wild type/Mutant	2013-12-10	2013	4	0	0	4-2013	Coughing		3. Lake Endemic		1. 0 - 5 years
KOM1404223	Kombewa DH	4/30/2014	Kisumu	Female	Kisumu	No		Yes		5	2	No			Fever	2	10	39	121	Malaria		234480					Lake Endemic	0	0 - 5 years	Wild type	Wild type	Mutant	2014-04-30	2014	2	1	0	2-2014	Fever	12.3651	3. Lake Endemic	MDR184	1. 0 - 5 years
KOM1406262	Kombewa DH	4/12/2014	Kisumu	Female	Kisumu	Yes	<2weeks	Yes	3		0	No			Headache	2	66	37.7	86	Malaria		7840					Lake Endemic	20	Above 15 years	Wild type	Wild type	Wild type	2014-04-12	2014	2	0	0	2-2014	Headache	8.96699	3. Lake Endemic		3. Above 15 years
KDH0904199	Kisumu DH	4/7/2009	Kisumu	Male	Kisumu	No		Yes		2	3	No			Fever	1	15	36.5	110	Malaria		29250					Lake Endemic	2	0 - 5 years	Mutant	Mutant	Wild type	2009-04-07	2009	2	1	1	2-2009	Fever	10.2836	3. Lake Endemic	MDR86	1. 0 - 5 years
KDH14011279	Kisumu DH	1/13/2014	Kisumu	Male	Kisumu	No		Yes		2	3	No			Fever	1	12.3	39.2	164	Malaria		45000					Lake Endemic	2	0 - 5 years	Wild type	Wild type	Mutant	2014-01-13	2014	1	1	0	1-2014	Fever	10.7144	3. Lake Endemic	MDR184	1. 0 - 5 years
KDH1202804	Kisumu DH	2/9/2012	Kisumu	Male	Kisumu	No		Yes		5	2	No			Fever	2	14	39.2	144	Malaria		245250					Lake Endemic	3	0 - 5 years	Wild type	Wild type	Mutant	2012-02-09	2012	1	1	0	1-2012	Fever	12.41	3. Lake Endemic	MDR184	1. 0 - 5 years
KDH1111757	Kisumu DH	11/15/2011	Kisumu	Male	Kisumu	No		Yes	1		0	No			Vomiting	3	27	38.1	96	Malaria		13500					Lake Endemic	5	0 - 5 years	Wild type	wild type/Mutant	wild type/Mutant	2011-11-15	2011	4	0	0	4-2011	Others	9.51044	3. Lake Endemic		1. 0 - 5 years
KDH1202800	Kisumu DH	2/3/2012	Kisumu	Female	Kisumu	No		Yes		5	2	No			Headache	13	63	35	93	Malaria		146250					Lake Endemic	50	Above 15 years	wild type/Mutant	Wild type	Wild type	2012-02-03	2012	1	0	0	1-2012	Headache	11.8931	3. Lake Endemic		3. Above 15 years
KDH1202799	Kisumu DH	2/2/2012	Kisumu	Female	Kisumu	No		Yes		2	4	No			Headache	1	34	37.9	140	Malaria	RTI	180000					Lake Endemic	11	6 - 15 years	wild type/Mutant	Wild type	wild type/Mutant	2012-02-02	2012	1	0	0	1-2012	Headache	12.1007	3. Lake Endemic		2. 6 - 15 years
KDH1105622	Kisumu DH	5/5/2011	Kisumu	Female	Kisumu	Yes	<2weeks	Yes		2	1	No			Headache	1	89	38.6	92	Malaria		11250					Lake Endemic	25	Above 15 years	wild type/Mutant	Wild type	Wild type	2011-05-05	2011	2	0	0	2-2013	Headache	9.32812	3. Lake Endemic		3. Above 15 years
KDH1108698	Kisumu DH	8/26/2011	Kisumu	Female	Kisumu	Yes	2-4 weeks	Yes	1	2		No			Headache	2	60	39.2	140	Malaria		22500					Lake Endemic	26	Above 15 years	wild type/Mutant	wild type/Mutant	Mutant	2011-08-26	2011	3	1	0	3-2011	Headache	10.0213	3. Lake Endemic	MDR184	3. Above 15 years
KDH1102569	Kisumu DH	2/14/2011	Kisumu	Male	Kisumu	No		Yes		4	2	No			Fever	3	18	36.4	110	Malaria		9000					Lake Endemic	5	0 - 5 years	wild type/Mutant	Wild type	Mutant	2011-02-14	2011	1	1	0	1-2011	Fever	9.10498	3. Lake Endemic	MDR184	1. 0 - 5 years
KDH0906228	Kisumu DH	6/3/2009	Kisumu	Female	Kisumu	No		Yes		6	1	No			Headache	2	22	36.3	100	Malaria		470250					Lake Endemic	10	6 - 15 years	Wild type	Wild type	undetermined	2009-06-03	2009	2	0	0	2-2009	Headache	13.061	3. Lake Endemic		2. 6 - 15 years
KDH1106643	Kisumu DH	6/2/2011	Kisumu	Male	Kisumu	No		Yes		4	2	No			Fever	2	17	36.5	136	Malaria		13500					Lake Endemic	4	0 - 5 years	Wild type	wild type/Mutant	undetermined	2011-06-02	2011	2	0	0	2-2013	Fever	9.51044	3. Lake Endemic		1. 0 - 5 years
KDH0910270	Kisumu DH	10/14/2009	Kisumu	Female	Kisumu	No		Yes		3	3	No			Fever	3	7.5	36	88	Malaria		27000					Lake Endemic	2	0 - 5 years	Mutant	Mutant	Wild type	2009-10-14	2009	4	1	1	4-2009	Fever	10.2036	3. Lake Endemic	MDR86	1. 0 - 5 years
KOM1405240	Kombewa DH	5/19/2014	Kisumu	Female	Kisumu	No		Yes		4	4	No			Fever	2	15	38.3	121	Malaria		177440					Lake Endemic	4	0 - 5 years	Wild type	Wild type	Wild type	2014-05-19	2014	2	0	0	2-2014	Fever	12.0864	3. Lake Endemic		1. 0 - 5 years
KDH1003376	Kisumu DH	3/18/2010	Kisumu	Female	Kisumu	Yes	2-4 weeks	No				No			Seizure	1	11	39.5	146	Malaria		4500					Lake Endemic	2	0 - 5 years	wild type/Mutant	Wild type	wild type/Mutant	2010-03-18	2010	1	0	0	1-2010	Others	8.41183	3. Lake Endemic		1. 0 - 5 years
KDH1201795	Kisumu DH	1/31/2012	Kisumu	Male	Kisumu	No		No				No			Stomachache	3	19	36.5	120	Malaria		225000					Lake Endemic	5	0 - 5 years	Mutant	Wild type	Wild type	2012-01-31	2012	1	1	1	1-2012	Others	12.3239	3. Lake Endemic	CRT76	1. 0 - 5 years
KDH1201768	Kisumu DH	1/9/2012	Kisumu	Female	Kisumu	Yes	<2weeks	No				No			Fever	1	15	39.1	148	Malaria		11250					Lake Endemic	3	0 - 5 years	Mutant	undetermined	undetermined	2012-01-09	2012	1	1	1	1-2012	Fever	9.32812	3. Lake Endemic	CRT76	1. 0 - 5 years
KDH1201769	Kisumu DH	1/9/2012	Kisumu	Female	Kisumu	Yes	<2weeks	Yes		6	1	No			Fever	2	14	39.7	156	Malaria		45000					Lake Endemic	2	0 - 5 years	Mutant	undetermined	Wild type	2012-01-09	2012	1	1	1	1-2012	Fever	10.7144	3. Lake Endemic	CRT76	1. 0 - 5 years
KOM1404211	Kombewa DH	4/17/2014	Kisumu	Male	Kisumu	No		No				No			Fever	3	19	39.2	114	Malaria		157120					Lake Endemic	6	6 - 15 years	Wild type	wild type/Mutant	wild type/Mutant	2014-04-17	2014	2	0	0	2-2014	Fever	11.9648	3. Lake Endemic		2. 6 - 15 years
KDH1102564	Kisumu DH	2/8/2011	Kisumu	Female	Kisumu	No		Yes	2			No			Fever	1	29	39.6	100	Malaria		441000					Lake Endemic	9	6 - 15 years	Wild type	Wild type	Wild type	2011-02-08	2011	1	0	0	1-2011	Fever	12.9968	3. Lake Endemic		2. 6 - 15 years
KDH1201793	Kisumu DH	1/27/2012	Kisumu	Male	Kisumu	No		Yes		8	2	No			Vomiting	1	16	39.2	156	Malaria		283500					Lake Endemic	4	0 - 5 years	wild type/Mutant	undetermined	undetermined	2012-01-27	2012	1	0	0	1-2012	Others	12.555	3. Lake Endemic		1. 0 - 5 years
KDH1205834	Kisumu DH	5/2/2012	Kisumu	Female	Kisumu	Yes	<2weeks	Yes		8	1	No				4	14	39.8	168	Malaria		65250					Lake Endemic	2	0 - 5 years	wild type/Mutant	Mutant	Wild type	2012-05-02	2012	2	1	0	2-2012		11.086	3. Lake Endemic	MDR86	1. 0 - 5 years
KDH1201792	Kisumu DH	1/27/2012	Kisumu	Female	Kisumu	No		No				No			Fever	1	12	39.2	160	Malaria		238500					Lake Endemic	3	0 - 5 years	wild type/Mutant	undetermined	Mutant	2012-01-27	2012	1	1	0	1-2012	Fever	12.3821	3. Lake Endemic	MDR184	1. 0 - 5 years
KDH14051390	Kisumu DH	5/8/2014	Kisumu	Male	Kisumu	No		Yes		8	3	No			Headache	5	30	37.2	109	Malaria		114750					Lake Endemic	10	6 - 15 years	Wild type	Wild type	wild type/Mutant	2014-05-08	2014	2	0	0	2-2014	Headache	11.6505	3. Lake Endemic		2. 6 - 15 years
KDH1103579	Kisumu DH	3/14/2011	Kisumu	Male	Kisumu	No		Yes		3	3	No			Fever	2	10	38.3	144	Malaria		33750					Lake Endemic	1	0 - 5 years	Wild type	Wild type	Wild type	2011-03-14	2011	1	0	0	1-2011	Fever	10.4267	3. Lake Endemic		1. 0 - 5 years
KOM1310096	Kombewa DH	10/31/2013	Kisumu	Male	Kisumu	No		Yes		8	3	No			Fever	2	16.1	37.3	111	Malaria		105600					Lake Endemic	4	0 - 5 years	Wild type	Wild type	Wild type	2013-10-31	2013	4	0	0	4-2013	Fever	11.5674	3. Lake Endemic		1. 0 - 5 years
KDH1201786	Kisumu DH	1/19/2012	Kisumu	Male	Kisumu	Yes	1-2 months	Yes		6	1	No			Vomiting	2	34	37.1	104	Malaria		182250					Lake Endemic	10	6 - 15 years	wild type/Mutant	Wild type	wild type/Mutant	2012-01-19	2012	1	0	0	1-2012	Others	12.1131	3. Lake Endemic		2. 6 - 15 years
KDH1201780	Kisumu DH	1/17/2012	Kisumu	Female	Kisumu	Yes	1-2 months	Yes	2		0	No			Fever	3	22	39.9	108	Malaria		830250					Lake Endemic	8	6 - 15 years	Mutant	Wild type	Mutant	2012-01-17	2012	1	1	1	1-2012	Fever	13.6295	3. Lake Endemic	MDR184	2. 6 - 15 years
KDH1201781	Kisumu DH	1/17/2012	Kisumu	Female	Kisumu	No		No				No			Fever	1	13	39.3	160	Malaria		762750					Lake Endemic	2	0 - 5 years	wild type/Mutant	wild type/Mutant	wild type/Mutant	2012-01-17	2012	1	0	0	1-2012	Fever	13.5447	3. Lake Endemic		1. 0 - 5 years
KDH1002356	Kisumu DH	2/10/2010	Kisumu	Female	Kisumu	No		Yes		7	1	No			Fever	3	10.5	38.7	106	Malaria		63000					Lake Endemic	2	0 - 5 years	wild type/Mutant	Mutant	Wild type	2010-02-10	2010	1	1	0	1-2010	Fever	11.0509	3. Lake Endemic	MDR86	1. 0 - 5 years
KDH1207874	Kisumu DH	7/19/2012	Kisumu	Female	Kisumu	No		No				No			Fever	1	21	39.1	136	Malaria	RTI	42750					Lake Endemic	6	6 - 15 years	Wild type	Wild type	Wild type	2012-07-19	2012	3	0	0	2-2013	Fever	10.6631	3. Lake Endemic		2. 6 - 15 years
KDH0910277	Kisumu DH	10/19/2009	Kisumu	Female	Kisumu	No		Yes		3	3	No			Fever	2	15	37.5	90	Malaria		117000					Lake Endemic	4	0 - 5 years	wild type/Mutant	Wild type	Wild type	2009-10-19	2009	4	0	0	4-2009	Fever	11.6699	3. Lake Endemic		1. 0 - 5 years
KDH1205836	Kisumu DH	5/3/2012	Kisumu	Male	Kisumu	No		Yes		8	2	No			Fever	1	21	39.1	160	Malaria		20250					Lake Endemic			undetermined	Wild type	Mutant	2012-05-03	2012	2	1	2	2-2012	Fever	9.91591	3. Lake Endemic	MDR184
KDH1010504	Kisumu DH	10/26/2010	Kisumu	Male	Kisumu	No		No				No			Vomiting	2	14	35.2	94	Malaria		168750					Lake Endemic			Mutant	Wild type	wild type/Mutant	2010-10-26	2010	4	1	1	4-2010	Others	12.0362	3. Lake Endemic	CRT76
KOM1406270	Kombewa DH	6/19/2014	Kisumu	Male	Kisumu	No		Yes		1	3	Yes	Other	Hospital/Dispensary	Fever	3	18	38.9	138	Malaria		395760					Lake Endemic	4	0 - 5 years	Wild type	Wild type	Mutant	2014-06-19	2014	2	1	0	2-2014	Fever	12.8886	3. Lake Endemic	MDR184	1. 0 - 5 years
KDH0803007	Kisumu DH	3/19/2008	Nyando	Male	Kisumu	No		Yes	1		1	No			Fever	4	13.7	37.3	145	Malaria		99000					Lake Endemic	4	0 - 5 years	Mutant	wild type/Mutant	Wild type	2008-03-19	2008	1	1	1	1-2008	Fever	11.5029	3. Lake Endemic	CRT76	1. 0 - 5 years
KDH0911289	Kisumu DH	11/3/2009	Kisumu	Male	Kisumu	No		Yes		3	3	No			Fever	2	58	38	78	Malaria		40500					Lake Endemic	35	Above 15 years	Mutant	Wild type	undetermined	2009-11-03	2009	4	1	1	4-2009	Fever	10.6091	3. Lake Endemic	CRT76	3. Above 15 years
KDH0910288	Kisumu DH	10/29/2009	Kisumu	Female	Kisumu	No		Yes	1		0	No			Headache	2	21	37.4	96	Malaria		22500					Lake Endemic	5	0 - 5 years	wild type/Mutant	Wild type	undetermined	2009-10-29	2009	4	0	0	4-2009	Headache	10.0213	3. Lake Endemic		1. 0 - 5 years
KDH14041372	Kisumu DH	4/10/2014	Kisumu	Female	Kisumu	No		Yes		11	1	No			Fever	1	12.9	37.9	137	Malaria		74250					Lake Endemic	3	0 - 5 years	wild type/Mutant	Wild type	Mutant	2014-04-10	2014	2	1	0	2-2014	Fever	11.2152	3. Lake Endemic	MDR184	1. 0 - 5 years
KDH14011290	Kisumu DH	1/15/2014	Kisumu	Female	Kisumu	Yes	<2weeks	Yes		5	1	No			Fever	1	9.5	37	140	Malaria		60750					Lake Endemic	1	0 - 5 years	Wild type	Wild type	Wild type	2014-01-15	2014	1	0	0	1-2014	Fever	11.0145	3. Lake Endemic		1. 0 - 5 years
KDH1005423	Kisumu DH	5/18/2010	Kisumu	Male	Kisumu	Yes	2-4 weeks	Yes		9	1	No			Headache	2	71	38.3	70	Malaria		45000					Lake Endemic	48	Above 15 years	Wild type	Wild type	Wild type	2010-05-18	2010	2	0	0	2-2010	Headache	10.7144	3. Lake Endemic		3. Above 15 years
KOM1406281	Kombewa DH	6/26/2014	Kisumu	Female	Kisumu	No		Yes		4	2	No			Fever	4	76	37.2	81	Malaria		16000					Lake Endemic	20	Above 15 years	Wild type	Wild type	Wild type	2014-06-26	2014	2	0	0	2-2014	Fever	9.68034	3. Lake Endemic		3. Above 15 years
KOM1402152	Kombewa DH	2/11/2014	Kisumu	Male	Kisumu	No		Yes		3	3	No			Fever	3	12	37.4	117	Malaria		28800					Lake Endemic	2	0 - 5 years	Wild type	Wild type	wild type/Mutant	2014-02-11	2014	1	0	0	1-2014	Fever	10.2681	3. Lake Endemic		1. 0 - 5 years
KDH1107675	Kisumu DH	7/27/2011	Kisumu	Female	Kisumu	No		Yes		5		No			Headache	2	33	39.7	146	Malaria		31500					Lake Endemic	11	6 - 15 years	Wild type	Wild type	undetermined	2011-07-27	2011	3	0	0	3-2011	Headache	10.3577	3. Lake Endemic		2. 6 - 15 years
KDH0910276	Kisumu DH	10/16/2009	Kisumu	Male	Kisumu	No		Yes	1		1	No			Headache	2	70	36.6	72	Malaria		20250					Lake Endemic	23	Above 15 years	wild type/Mutant	Wild type	Mutant	2009-10-16	2009	4	1	0	4-2009	Headache	9.91591	3. Lake Endemic	MDR184	3. Above 15 years
KDH1202812	Kisumu DH	2/27/2012	Kisumu	Female	Kisumu	No		Yes		5	1	No			Fever	3	13	37.3	132	Malaria		443250					Lake Endemic	4	0 - 5 years	Wild type	wild type/Mutant	Mutant	2012-02-27	2012	1	1	0	1-2012	Fever	13.0019	3. Lake Endemic	MDR184	1. 0 - 5 years
KOM1406284	Kombewa DH	6/30/2014	Kisumu	Female	Kisumu	No		Yes		1	4	Yes	Other	Hospital/Dispensary	Headache	1	59	38.1	120	Malaria		8320					Lake Endemic	36	Above 15 years	Wild type	Wild type	Wild type	2014-06-30	2014	2	0	0	2-2014	Headache	9.02642	3. Lake Endemic		3. Above 15 years
KDH1101555	Kisumu DH	1/21/2011	Kisumu	Male	Kisumu	Yes	2-4 weeks	Yes		2	2	No			Vomiting	4	15.1	36.2	108	Malaria		92250					Lake Endemic	4	0 - 5 years	Wild type	Wild type	Wild type	2011-01-21	2011	1	0	0	1-2011	Others	11.4323	3. Lake Endemic		1. 0 - 5 years
KDH1104599	Kisumu DH	4/12/2011	Kisumu	Female	Kisumu	No		Yes		2	3	No			Headache	2	28	35.8	124	Malaria		27000					Lake Endemic	11	6 - 15 years	wild type/Mutant	Wild type	Wild type	2011-04-12	2011	2	0	0	2-2013	Headache	10.2036	3. Lake Endemic		2. 6 - 15 years
KDH14061423	Kisumu DH	6/3/2014	Kisumu	Female	Kisumu	No		Yes		3	1	No			Fever	3	15	37.1	136	Malaria		9000					Lake Endemic	4	0 - 5 years	undetermined	wild type/Mutant	wild type/Mutant	2014-06-03	2014	2	0	2	2-2014	Fever	9.10498	3. Lake Endemic		1. 0 - 5 years
KDH0906230	Kisumu DH	6/9/2009	Kisumu	Male	Kisumu	No		No				No			Fever	1	22	39.3	113	Malaria		67500					Lake Endemic	7	6 - 15 years	wild type/Mutant	Mutant	Wild type	2009-06-09	2009	2	1	0	2-2009	Fever	11.1199	3. Lake Endemic	MDR86	2. 6 - 15 years
KDH0803016	Kisumu DH	3/31/2011	Kisumu	Male	Kisumu	Yes	<2weeks	Yes	10			No			Stomachache	3	78	38.3	94	Malaria		24750					Lake Endemic	37	Above 15 years	Mutant	wild type/Mutant	wild type/Mutant	2011-03-31	2011	1	1	1	1-2011	Others	10.1166	3. Lake Endemic	CRT76	3. Above 15 years
KDH14031347	Kisumu DH	3/10/2014	Kisumu	Male	Kisumu	Yes	<2weeks	Yes		7	2	No			Fever	5	19.5	38.3	161	Malaria		40500					Lake Endemic	4	0 - 5 years	Wild type	Wild type	Mutant	2014-03-10	2014	1	1	0	1-2014	Fever	10.6091	3. Lake Endemic	MDR184	1. 0 - 5 years
KDH0904207	Kisumu DH	4/27/2009	Kisumu	Female	Kisumu	No		Yes	3		0	No			Headache	1	24	37.9	120	Malaria		78750					Lake Endemic	9	6 - 15 years	wild type/Mutant	Mutant	Wild type	2009-04-27	2009	2	1	0	2-2009	Headache	11.274	3. Lake Endemic	MDR86	2. 6 - 15 years
KDH1003377	Kisumu DH	3/18/2010	Kisumu	Male	Kisumu	Yes	1-2 months	Yes		2	2	No			Fever	1	14.3	38.9	132	Malaria		18000					Lake Endemic	4	0 - 5 years	Wild type	Wild type	Wild type	2010-03-18	2010	1	0	0	1-2010	Fever	9.79813	3. Lake Endemic		1. 0 - 5 years
KDH1110721	Kisumu DH	11/10/2011	Kisumu	Male	Kisumu	No		No				No			Fever	1	13	38.5	110	Malaria		112500					Lake Endemic	2	0 - 5 years	wild type/Mutant	Wild type	Mutant	2011-11-10	2011	4	1	0	4-2011	Fever	11.6307	3. Lake Endemic	MDR184	1. 0 - 5 years
KDH1011508	Kisumu DH	11/8/2010	Kisumu	Male	Kisumu	No		Yes		4	4	No			Fever	1	19	35.6	120	Malaria		74250					Lake Endemic	4	0 - 5 years	Mutant	Wild type	wild type/Mutant	2010-11-08	2010	4	1	1	4-2010	Fever	11.2152	3. Lake Endemic	CRT76	1. 0 - 5 years
KDH1101553	Kisumu DH	1/18/2011	Kisumu	Male	Kisumu	Yes	<2weeks	No				No			Fever	2	10.5	39	136	Malaria		168750					Lake Endemic	2	0 - 5 years	Wild type	undetermined	Wild type	2011-01-18	2011	1	0	0	1-2011	Fever	12.0362	3. Lake Endemic		1. 0 - 5 years
KDH1106646	Kisumu DH	6/7/2011	Kisumu	Female	Kisumu	Yes	2-4 weeks	Yes	7			No			Headache	4	61	36.8	96	Malaria		11250					Lake Endemic	23	Above 15 years	Mutant	undetermined	undetermined	2011-06-07	2011	2	1	1	2-2013	Headache	9.32812	3. Lake Endemic	CRT76	3. Above 15 years
KDH1201779	Kisumu DH	1/17/2012	Kisumu	Male	Kisumu	No		Yes		3	2	No			Fever	1	11.5	40	204	Malaria		380250					Lake Endemic	3	0 - 5 years	Mutant	Wild type	Wild type	2012-01-17	2012	1	1	1	1-2012	Fever	12.8486	3. Lake Endemic	CRT76	1. 0 - 5 years
KDH14011282	Kisumu DH	1/14/2014	Kisumu	Male	Kisumu	Yes	<2weeks	Yes		5	3	No			Fever	1	15.3	39.2	136	Malaria		76500					Lake Endemic	2	0 - 5 years	Wild type	Wild type	Mutant	2014-01-14	2014	1	1	0	1-2014	Fever	11.245	3. Lake Endemic	MDR184	1. 0 - 5 years
KDH13111222	Kisumu DH	11/1/2013	Kisumu	Male	Kisumu	Yes	<2weeks	No				No			Fever	1	17	37.8	133	Malaria							Lake Endemic	4	0 - 5 years	undetermined	wild type/Mutant	wild type/Mutant	2013-11-01	2013	4	0	2	4-2013	Fever		3. Lake Endemic		1. 0 - 5 years
KOM1406265	Kombewa DH	6/16/2014	Kisumu	Male	Kisumu	No		Yes		9	3	No			Fever	4	18	38	131	Malaria		259840					Lake Endemic	4	0 - 5 years	Wild type	Wild type	wild type/Mutant	2014-06-16	2014	2	0	0	2-2014	Fever	12.4678	3. Lake Endemic		1. 0 - 5 years
KDH14011286	Kisumu DH	1/15/2014	Kisumu	Female	Kisumu	Yes	<2weeks	Yes	1		0	No			Fever	0	15.9	39.9	164	Malaria		54000					Lake Endemic	4	0 - 5 years	Wild type	Wild type	Mutant	2014-01-15	2014	1	1	0	1-2014	Fever	10.8967	3. Lake Endemic	MDR184	1. 0 - 5 years
KDH0903193	Kisumu DH	3/16/2009	Kisumu	Male	Kisumu	Yes	<2weeks	Yes		3	2	No			Fever	2	18	39.9	181	Malaria		67500					Lake Endemic	5	0 - 5 years	wild type/Mutant	Wild type	Mutant	2009-03-16	2009	1	1	0	1-2009	Fever	11.1199	3. Lake Endemic	MDR184	1. 0 - 5 years
KDH0806066	Kisumu DH	6/10/2008	Kisumu	Male	Kisumu	No		Yes		3	1	No			Headache	2	34	37	73	Malaria		42750					Lake Endemic			wild type/Mutant	Mutant	Wild type	2008-06-10	2008	2	1	0	2-2008	Headache	10.6631	3. Lake Endemic	MDR86
KDH0808092	Kisumu DH	8/6/2008	Kisumu	Female	Kisumu	No		Yes		1	6	Yes	Camoquine	Pharmacist	Fever	4	10	38	108	Malaria		49500					Lake Endemic	1	0 - 5 years	Mutant	wild type/Mutant	Wild type	2008-08-06	2008	3	1	1	3-2008	Fever	10.8097	3. Lake Endemic	CRT76	1. 0 - 5 years
KOM1401133	Kombewa DH	1/20/2014	Kisumu	Male	Kisumu	No		Yes		3	2	No			Fever	4	9.3	38.4	11	Malaria		244160					Lake Endemic	1	0 - 5 years	Wild type	Wild type	Mutant	2014-01-20	2014	1	1	0	1-2014	Fever	12.4056	3. Lake Endemic	MDR184	1. 0 - 5 years
KDH1112759	Kisumu DH	12/6/2011	Kisumu	Female	Kisumu	Yes	2-4 weeks	Yes			5	Yes	Other	Hospital/Dispensary	Joint Pains	3	84	37.1	88	Malaria		22500					Lake Endemic	30	Above 15 years	Mutant	Wild type	undetermined	2011-12-06	2011	4	1	1	4-2011	Joint Pains	10.0213	3. Lake Endemic	CRT76	3. Above 15 years
KDH0903194	Kisumu DH	3/23/2009	Kisumu	Male	Kisumu	Yes	<2weeks	Yes			1	No			Headache	2	78	36.8	71	Malaria		45000					Lake Endemic	20	Above 15 years	Mutant	Mutant	Wild type	2009-03-23	2009	1	1	1	1-2009	Headache	10.7144	3. Lake Endemic	MDR86	3. Above 15 years
KDH0910263	Kisumu DH	10/5/2009	Kisumu	Female	Kisumu	No		Yes	1		1	No			Fever	3	68	38.2	82	Malaria		18000					Lake Endemic	22	Above 15 years	wild type/Mutant	Wild type	Wild type	2009-10-05	2009	4	0	0	4-2009	Fever	9.79813	3. Lake Endemic		3. Above 15 years
KDH14051404	Kisumu DH	5/19/2014	Kisumu	Female	Kisumu	Yes	<2weeks	No				No			Fever	1	7	38.1	164	Malaria		9000					Lake Endemic	0	0 - 5 years	Wild type	Wild type	Wild type	2014-05-19	2014	2	0	0	2-2014	Fever	9.10498	3. Lake Endemic		1. 0 - 5 years
KOM1312120	Kombewa DH	12/10/2013	Kisumu	Male	Kisumu	No		Yes		2	4	No			Coughing	2	10	38.9	121	Malaria		36320					Lake Endemic	1	0 - 5 years	Wild type	Wild type	Mutant	2013-12-10	2013	4	1	0	4-2013	Coughing	10.5001	3. Lake Endemic	MDR184	1. 0 - 5 years
KOM1403189	Kombewa DH	3/18/2014	Kisumu	Male	Kisumu	Yes	1-2 months	Yes		4	3	No			Fever	3	15	40.1	92	Malaria		103040					Lake Endemic	3	0 - 5 years	undetermined	wild type/Mutant	Wild type	2014-03-18	2014	1	0	2	1-2014	Fever	11.5429	3. Lake Endemic		1. 0 - 5 years
KDH1109712	Kisumu DH	9/26/2011	Kisumu	Male	Kisumu	No		Yes	2			No			Headache	1	31	36.2	108	Malaria		621000					Lake Endemic	12	6 - 15 years	wild type/Mutant	Wild type	Mutant	2011-09-26	2011	3	1	0	3-2011	Headache	13.3391	3. Lake Endemic	MDR184	2. 6 - 15 years
KDH0905212	Kisumu DH	5/13/2009	Kisumu	Male	Kisumu	Yes	<2weeks	Yes		4	3	No			Headache	3	59	36.7	73	Malaria		14240					Lake Endemic	29	Above 15 years	wild type/Mutant	wild type/Mutant	Wild type	2009-05-13	2009	2	0	0	2-2009	Headache	9.56381	3. Lake Endemic		3. Above 15 years
KDH13091199	Kisumu DH	9/26/2013	Kisumu	Male	Kisumu	Yes	<2weeks	Yes		2	3	No			Fever	3	9	39.4	126	Malaria	RTI						Lake Endemic	1	0 - 5 years	undetermined	wild type/Mutant	wild type/Mutant	2013-09-26	2013	3	0	2	3-2013	Fever		3. Lake Endemic		1. 0 - 5 years
KDH1001343	Kisumu DH	1/28/2010	Kisumu	Male	Kisumu	No		Yes		5	2	Yes	Fansidar	Self	Headache	27	61	36.3	76	Malaria		11250					Lake Endemic	20	Above 15 years	Mutant	Wild type	undetermined	2010-01-28	2010	1	1	1	1-2010	Headache	9.32812	3. Lake Endemic	CRT76	3. Above 15 years
KDH0906240	Kisumu DH	6/25/2009	Kisumu	Male	Kisumu	No		Yes		2	3	No			Headache	3	40	38.1	104	Malaria		184500					Lake Endemic	12	6 - 15 years	wild type/Mutant	wild type/Mutant	Mutant	2009-06-25	2009	2	1	0	2-2009	Headache	12.1254	3. Lake Endemic	MDR184	2. 6 - 15 years
KDH0803013	Kisumu DH	3/27/2008	Kisumu	Female	Kisumu	Yes	2-4 weeks	Yes	1		1	No			Fever	3	13.1	40.3	160	Malaria		81000					Lake Endemic	2	0 - 5 years	wild type/Mutant	Mutant	Wild type	2008-03-27	2008	1	1	0	1-2008	Fever	11.3022	3. Lake Endemic	MDR86	1. 0 - 5 years
KDH14051398	Kisumu DH	5/13/2014	Kisumu	Male	Kisumu	Yes	2-4 weeks	Yes	6		0	No			Fever	2	56	38.7	104	Malaria		22500					Lake Endemic	21	Above 15 years	wild type/Mutant	Wild type	wild type/Mutant	2014-05-13	2014	2	0	0	2-2014	Fever	10.0213	3. Lake Endemic		3. Above 15 years
KDH14011312	Kisumu DH	1/27/2014	Kisumu	Female	Kisumu	No		Yes		3	2	No			Headache	1	52	38.1	116	Malaria		13500					Lake Endemic	18	Above 15 years	Wild type	Wild type	Wild type	2014-01-27	2014	1	0	0	1-2014	Headache	9.51044	3. Lake Endemic		3. Above 15 years
KDH0906236	Kisumu DH	6/22/2009	Kisumu	Male	Kisumu	Yes	<2weeks	No				No			Fever	7	7	36.7	130	Malaria		173250					Lake Endemic	0	0 - 5 years	Mutant	wild type/Mutant	Wild type	2009-06-22	2009	2	1	1	2-2009	Fever	12.0625	3. Lake Endemic	CRT76	1. 0 - 5 years
KDH14021331	Kisumu DH	2/19/2014	Kisumu	Male	Kisumu	No		Yes		2	3	No			Fever	2	10.6	39.9	150	Malaria		65250					Lake Endemic	1	0 - 5 years	Wild type	Wild type	wild type/Mutant	2014-02-19	2014	1	0	0	1-2014	Fever	11.086	3. Lake Endemic		1. 0 - 5 years
KDH0805040	Kisumu DH	5/8/2008	Kisumu	Female	Kisumu	Yes	2-4 weeks	Yes		1	2	Yes	Other		Headache	7	58	37.4	89	Malaria							Lake Endemic	60	Above 15 years	Mutant	wild type/Mutant	Wild type	2008-05-08	2008	2	1	1	2-2008	Headache		3. Lake Endemic	CRT76	3. Above 15 years
KOM1310087	Kombewa DH	10/16/2013	Kisumu	Male	Kisumu	No		Yes		1	8	Yes	Other	Hospital/Dispensary	Fever	2	16.1	38.1	123	Malaria		104000					Lake Endemic	2	0 - 5 years	Wild type	Wild type	wild type/Mutant	2013-10-16	2013	4	0	0	4-2013	Fever	11.5521	3. Lake Endemic		1. 0 - 5 years
KDH0808090	Kisumu DH	8/4/2008	Kisumu	Female	Kisumu	Yes	1-2 months	Yes		1	2	Yes	Fansidar	Hospital/Dispensary	Headache	4	54	37.7	101	Malaria		18000					Lake Endemic	14	6 - 15 years	Mutant	Mutant	Wild type	2008-08-04	2008	3	1	1	3-2008	Headache	9.79813	3. Lake Endemic	MDR86	2. 6 - 15 years
KDH14051419	Kisumu DH	5/29/2014	Kisumu	Male	Kisumu	Yes	1-2 months	No				No			Fever	2	53	37.4	104	Malaria		6750					Lake Endemic	35	Above 15 years	Wild type	wild type/Mutant	wild type/Mutant	2014-05-29	2014	2	0	0	2-2014	Fever	8.8173	3. Lake Endemic		3. Above 15 years
KOM1401139	Kombewa DH	1/27/2014	GEM	Female	Siaya	Yes	<2weeks	Yes		3	2	No			Fever	2	13	37.9	101	Malaria		295040					Lake Endemic	3	0 - 5 years	Wild type	Wild type	wild type/Mutant	2014-01-27	2014	1	0	0	1-2014	Fever	12.5949	3. Lake Endemic		1. 0 - 5 years
KOM1403191	Kombewa DH	3/19/2014	Kisumu	Male	Kisumu	No		Yes		1	3	Yes	Quinine	Hospital/Dispensary	Fever	2	15	37.9	121	Malaria		269280					Lake Endemic	3	0 - 5 years	Wild type	Wild type	Mutant	2014-03-19	2014	1	1	0	1-2014	Fever	12.5035	3. Lake Endemic	MDR184	1. 0 - 5 years
KDH1201771	Kisumu DH	1/9/2012	Kisumu	Female	Kisumu	Yes	2-4 weeks	Yes		2	2	No			Fever	3	66	40	140	Malaria		54000					Lake Endemic	28	Above 15 years	wild type/Mutant	Wild type	Mutant	2012-01-09	2012	1	1	0	1-2012	Fever	10.8967	3. Lake Endemic	MDR184	3. Above 15 years
KDH14051416	Kisumu DH	5/27/2014	Kisumu	Female	Kisumu	No		No				No			Fever	5	20	38.7	132	Malaria		18000					Lake Endemic	6	6 - 15 years	undetermined	Wild type	Wild type	2014-05-27	2014	2	0	2	2-2014	Fever	9.79813	3. Lake Endemic		2. 6 - 15 years
KDH0804025	Kisumu DH	4/7/2008	Kisumu	Male	Kisumu	No		Yes		6	3	No			Fever	3	12.8	37.5	140	Malaria		480					Lake Endemic	2	0 - 5 years	wild type/Mutant	Mutant	Wild type	2008-04-07	2008	2	1	0	2-2008	Fever	6.17379	3. Lake Endemic	MDR86	1. 0 - 5 years
KDH1204830	Kisumu DH	4/24/2012	Kisumu	Male	Kisumu	No		Yes		2	3	No			Fever	9	11	37.9	156	Malaria	RTI	56250					Lake Endemic	2	0 - 5 years	undetermined	Wild type	undetermined	2012-04-24	2012	2	0	2	2-2012	Fever	10.9376	3. Lake Endemic		1. 0 - 5 years
KDH0901173	Kisumu DH	1/29/2009	Kisumu	Male	Kisumu	No		Yes		2	2	No			Vomiting	3	16	38.1	140	Malaria							Lake Endemic	4	0 - 5 years	Mutant	Mutant	Wild type	2009-01-29	2009	1	1	1	1-2009	Others		3. Lake Endemic	MDR86	1. 0 - 5 years
KDH14021336	Kisumu DH	2/25/2014	Kisumu	Female	Kisumu	Yes	<2weeks	No				No			Headache	1	41	39.5	120	Malaria		15750					Lake Endemic	21	Above 15 years	Wild type	Wild type	Mutant	2014-02-25	2014	1	1	0	1-2014	Headache	9.6646	3. Lake Endemic	MDR184	3. Above 15 years
KDH14021338	Kisumu DH	2/25/2014	Kisumu	Female	Kisumu	No		No				No			Fever	1	9	39.5	129	Malaria		20250					Lake Endemic	1	0 - 5 years	Wild type	Wild type	Mutant	2014-02-25	2014	1	1	0	1-2014	Fever	9.91591	3. Lake Endemic	MDR184	1. 0 - 5 years
KOM1403194	Kombewa DH	3/20/2014	Kisumu	Female	Kisumu	Yes	<2weeks	Yes	4		0	No			Fever	2	63	39	114	Malaria		7360					Lake Endemic	25	Above 15 years	Wild type	Wild type	Mutant	2014-03-20	2014	1	1	0	1-2014	Fever	8.90382	3. Lake Endemic	MDR184	3. Above 15 years
KDH1001335	Kisumu DH	1/26/2010	Kisumu	Female	Kisumu	Yes	<2weeks	Yes		3	1	No			Fever	3	10	39.8	160	Malaria		7200					Lake Endemic	1	0 - 5 years	wild type/Mutant	Wild type	undetermined	2010-01-26	2010	1	0	0	1-2010	Fever	8.88184	3. Lake Endemic		1. 0 - 5 years
KDH1109715	Kisumu DH	9/29/2011	Kisumu	Male	Kisumu	No		Yes	3			No			Headache	2	34	39.4	108	Malaria		9080					Lake Endemic	11	6 - 15 years	wild type/Mutant	Wild type	Mutant	2011-09-29	2011	3	1	0	3-2011	Headache	9.11383	3. Lake Endemic	MDR184	2. 6 - 15 years
KDH0906239	Kisumu DH	6/25/2009	Kisumu	Male	Kisumu	No		Yes	1		1	No			Fever	1	18	38.6	155	Malaria		36000					Lake Endemic	4	0 - 5 years	Mutant	wild type/Mutant	Wild type	2009-06-25	2009	2	1	1	2-2009	Fever	10.4913	3. Lake Endemic	CRT76	1. 0 - 5 years
KDH0808089	Kisumu DH	8/1/2008	Kisumu	Male	Kisumu	Yes	2-4 weeks	Yes			4	No			Headache	1	28	37.7	113	Malaria		164250					Lake Endemic	9	6 - 15 years	Wild type	Mutant	Wild type	2008-08-01	2008	3	1	0	3-2008	Headache	12.0091	3. Lake Endemic	MDR86	2. 6 - 15 years
KDH1012534	Kisumu DH	12/7/2010	Kisumu	Female	Kisumu	Yes	1-2 months	Yes		6	1	No			Dizziness	2	56	36	96	Malaria		11250					Lake Endemic	26	Above 15 years	Mutant	Wild type	Mutant	2010-12-07	2010	4	1	1	4-2010	Others	9.32812	3. Lake Endemic	MDR184	3. Above 15 years
KDH1202809	Kisumu DH	2/17/2012	Kisumu	Female	Kisumu	No		Yes		7	1	No			Fever	4	16	38.6	132	Malaria		99000					Lake Endemic	5	0 - 5 years	Wild type	Wild type	Mutant	2012-02-17	2012	1	1	0	1-2012	Fever	11.5029	3. Lake Endemic	MDR184	1. 0 - 5 years
KDH1001344	Kisumu DH	1/28/2010	Kisumu	Female	Kisumu	No		No				No			Fever	2	20	35	100	Malaria		54000					Lake Endemic	6	6 - 15 years	undetermined	Mutant	Wild type	2010-01-28	2010	1	1	2	1-2010	Fever	10.8967	3. Lake Endemic	MDR86	2. 6 - 15 years
KOM1401130	Kombewa DH	1/16/2014	Kisumu	Female	Kisumu	No		Yes		4	3	No			Fever	2	20	37.4	99	Malaria		30560					Lake Endemic	5	0 - 5 years	Wild type	Wild type	Mutant	2014-01-16	2014	1	1	0	1-2014	Fever	10.3274	3. Lake Endemic	MDR184	1. 0 - 5 years
KDH1201766	Kisumu DH	1/5/2012	Kisumu	Male	Kisumu	Yes	<2weeks	Yes		5	1	No			Fever	3	14	39.7	160	Malaria		31500					Lake Endemic	5	0 - 5 years	Mutant	Wild type	wild type/Mutant	2012-01-05	2012	1	1	1	1-2012	Fever	10.3577	3. Lake Endemic	CRT76	1. 0 - 5 years
KDH1007454	Kisumu DH	7/5/2010	Kisumu	Male	Kisumu	No		Yes		2	1	No			Fever	3	17	37.6	102	Malaria		153000					Lake Endemic	4	0 - 5 years	undetermined	Wild type	Mutant	2010-07-05	2010	3	1	2	3-2010	Fever	11.9382	3. Lake Endemic	MDR184	1. 0 - 5 years
KDH1202808	Kisumu DH	2/15/2012	Kisumu	Female	Kisumu	No		Yes		7	3	No			Fever	4	14	40.2	188	Malaria		234000					Lake Endemic	2	0 - 5 years	Mutant	Wild type	Mutant	2012-02-15	2012	1	1	1	1-2012	Fever	12.3631	3. Lake Endemic	MDR184	1. 0 - 5 years
KDH0803008	Kisumu DH	3/19/2008	Kisumu	Male	Kisumu	No		Yes		1	1	Yes	Chloroquine	Pharmacist	Fever	3	16.4	39.4	160	Malaria		58500					Lake Endemic	5	0 - 5 years	Mutant	Wild type	Mutant	2008-03-19	2008	1	1	1	1-2008	Fever	10.9768	3. Lake Endemic	MDR184	1. 0 - 5 years
KDH14041383	Kisumu DH	4/29/2014	Kisumu	Female	Kisumu	Yes	<2weeks	Yes		4	2	No			Fever	2	18.4	39.1	145	Malaria		56250					Lake Endemic	4	0 - 5 years	Wild type	Wild type	Mutant	2014-04-29	2014	2	1	0	2-2014	Fever	10.9376	3. Lake Endemic	MDR184	1. 0 - 5 years
KOM1311106	Kombewa DH	11/12/2013	Kisumu	Female	Kisumu	No		Yes		2	3	No			Coughing	3	17	37.2	97	Malaria		98560					Lake Endemic	4	0 - 5 years	Wild type	Wild type	Mutant	2013-11-12	2013	4	1	0	4-2013	Coughing	11.4984	3. Lake Endemic	MDR184	1. 0 - 5 years
KOM1403190	Kombewa DH	3/18/2014	Kisumu	Female	Kisumu	No		Yes		1		Yes	Other	Hospital/Dispensary	Fever	2	10	37.9	118	Malaria		30560					Lake Endemic	2	0 - 5 years	Wild type	Wild type	wild type/Mutant	2014-03-18	2014	1	0	0	1-2014	Fever	10.3274	3. Lake Endemic		1. 0 - 5 years
KDH1106645	Kisumu DH	6/6/2011	Kisumu	Female	Kisumu	Yes	2-4 weeks	Yes	1	2		No			Headache	7	47	37.7	100	Malaria		6750					Lake Endemic	21	Above 15 years	Mutant	Wild type	undetermined	2011-06-06	2011	2	1	1	2-2013	Headache	8.8173	3. Lake Endemic	CRT76	3. Above 15 years
KDH0808100	Kisumu DH	8/15/2008	Kisumu	Male	Kisumu	Yes	<2weeks	Yes	1		0	No			Fever	1	14	38.1	154	Malaria		24750					Lake Endemic	2	0 - 5 years	Mutant	Mutant	Wild type	2008-08-15	2008	3	1	1	3-2008	Fever	10.1166	3. Lake Endemic	MDR86	1. 0 - 5 years
KDH0911315	Kisumu DH	11/30/2009	Kisumu	Female	Kisumu	No		Yes		4	1	No			Headache	3	24	37.4	120	Malaria		96750					Lake Endemic	8	6 - 15 years	Mutant	Wild type	undetermined	2009-11-30	2009	4	1	1	4-2009	Headache	11.4799	3. Lake Endemic	CRT76	2. 6 - 15 years
KDH14021327	Kisumu DH	2/12/2014	Kisumu	Male	Kisumu	Yes	1-2 months	Yes		2	4	No			Fever	1	13	36.2	131	Malaria							Lake Endemic	1	0 - 5 years	Wild type	Wild type	wild type/Mutant	2014-02-12	2014	1	0	0	1-2014	Fever		3. Lake Endemic		1. 0 - 5 years
KDH1009494	Kisumu DH	9/27/2010	Kisumu	Male	Kisumu	Yes	2-4 weeks	Yes		5		No			Fever	1	10	38.3	160	Malaria		13500					Lake Endemic	1	0 - 5 years	undetermined	Wild type	Mutant	2010-09-27	2010	3	1	2	3-2010	Fever	9.51044	3. Lake Endemic	MDR184	1. 0 - 5 years
KDH0805042	Kisumu DH	5/13/2008	Kisumu	Female	Kisumu	Yes	2-4 weeks	Yes		2	5	No			Fever	5	10	39.2	168	Malaria		380250					Lake Endemic	1	0 - 5 years	Mutant	Mutant	wild type/Mutant	2008-05-13	2008	2	1	1	2-2008	Fever	12.8486	3. Lake Endemic	MDR86	1. 0 - 5 years
KDH0906227	Kisumu DH	6/3/2009	Kisumu	Male	Kisumu	No		Yes		6	2	No			Fever	4	13.2	38.3	165	Malaria		81000					Lake Endemic	1	0 - 5 years	undetermined	wild type/Mutant	Wild type	2009-06-03	2009	2	0	2	2-2009	Fever	11.3022	3. Lake Endemic		1. 0 - 5 years
KDH0909256	Kisumu DH	9/23/2009	Kisumu	Female	Kisumu	No		Yes		7	3	No			Headache	7	70	36.5	78	Malaria		405000					Lake Endemic	18	Above 15 years	wild type/Mutant	Wild type	Mutant	2009-09-23	2009	3	1	0	3-2009	Headache	12.9116	3. Lake Endemic	MDR184	3. Above 15 years
KDH0811146	Kisumu DH	11/4/2008	Kisumu	Female	Kisumu	No		No				No			Fever		15	38	129	Malaria	RTI	119250					Lake Endemic	2	0 - 5 years	Mutant	Wild type	Wild type	2008-11-04	2008	4	1	1	4-2008	Fever	11.689	3. Lake Endemic	CRT76	1. 0 - 5 years
KDH0809116	Kisumu DH	9/9/2008	Kisumu	Male	Kisumu	No		Yes		2		No			Fever	9	12	36.5	121	Malaria		180000					Lake Endemic	2	0 - 5 years	Mutant	Mutant	Wild type	2008-09-09	2008	3	1	1	3-2008	Fever	12.1007	3. Lake Endemic	MDR86	1. 0 - 5 years
KDH1003362	Kisumu DH	3/9/2010	Kisumu	Male	Kisumu	No		Yes		5	1	No			Headache	6	20	36.1	98	Malaria		4500					Lake Endemic	6	6 - 15 years	Mutant	Wild type	wild type/Mutant	2010-03-09	2010	1	1	1	1-2010	Headache	8.41183	3. Lake Endemic	CRT76	2. 6 - 15 years
KDH1207868	Kisumu DH	7/12/2012	Kisumu	Male	Kisumu	No		Yes	1		0	No			Fever	1	15	37.9	124	Malaria		96750					Lake Endemic	4	0 - 5 years	Wild type	Wild type	Mutant	2012-07-12	2012	3	1	0	2-2013	Fever	11.4799	3. Lake Endemic	MDR184	1. 0 - 5 years
KDH14041376	Kisumu DH	4/15/2014	Kisumu	Female	Kisumu	Yes	<2weeks	Yes		8	1	No			Vomiting	8	12	37.9	115	Malaria		175500					Lake Endemic	2	0 - 5 years	Wild type	Wild type	Mutant	2014-04-15	2014	2	1	0	2-2014	Others	12.0754	3. Lake Endemic	MDR184	1. 0 - 5 years
KDH14071454	Kisumu DH	7/24/2014	Kisumu	Male	Kisumu	Yes	2-4 weeks	No				No			Fever	2	7.8	39.4	188	Malaria		45000					Lake Endemic	0	0 - 5 years	Wild type	Wild type	Wild type	2014-07-24	2014	3	0	0	3-2014	Fever	10.7144	3. Lake Endemic		1. 0 - 5 years
KDH1109699	Kisumu DH	9/5/2011	Kisumu	Male	Kisumu	Yes	2-4 weeks	Yes		4	4	No			Fever	1	12	37.6	144	Malaria		186750					Lake Endemic	2	0 - 5 years	wild type/Mutant	undetermined	undetermined	2011-09-05	2011	3	0	0	3-2011	Fever	12.1375	3. Lake Endemic		1. 0 - 5 years
KDH14011277	Kisumu DH	1/13/2014	Kisumu	Female	Kisumu	Yes	<2weeks	Yes		5	2	No			Fever	2	14	38.6	121	Malaria		33750					Lake Endemic	3	0 - 5 years	Wild type	wild type/Mutant	Mutant	2014-01-13	2014	1	1	0	1-2014	Fever	10.4267	3. Lake Endemic	MDR184	1. 0 - 5 years
KDH14031367	Kisumu DH	3/26/2014	Kisumu	Female	Kisumu	Yes	<2weeks	Yes		2	2	No			Fever	2	57	36.3	92	Malaria	RTI						Lake Endemic	24	Above 15 years	Wild type	Wild type	wild type/Mutant	2014-03-26	2014	1	0	0	1-2014	Fever		3. Lake Endemic		3. Above 15 years
KDH1007458	Kisumu DH	7/9/2010	Kisumu	Female	Kisumu	No		Yes	1	1		No			Fever	2	12.6	38.9	152	Malaria		15750					Lake Endemic	3	0 - 5 years	Mutant	Mutant	Wild type	2010-07-09	2010	3	1	1	3-2010	Fever	9.6646	3. Lake Endemic	MDR86	1. 0 - 5 years
KDH0904198	Kisumu DH	4/6/2009	Kisumu	Male	Kisumu	No		No				No			Fever	4	12.3	33.9	122	Malaria		126000					Lake Endemic	3	0 - 5 years	wild type/Mutant	Wild type	Wild type	2009-04-06	2009	2	0	0	2-2009	Fever	11.744	3. Lake Endemic		1. 0 - 5 years
KOM1406269	Kombewa DH	6/18/2014	Kisumu	Female	Kisumu	No		Yes		6	1	No			Stomachache	3	13.5	36.4	113	Malaria		7840					Lake Endemic	4	0 - 5 years	Wild type	Wild type	Mutant	2014-06-18	2014	2	1	0	2-2014	Others	8.96699	3. Lake Endemic	MDR184	1. 0 - 5 years
KOM1406280	Kombewa DH	6/26/2014	Kisumu	Female	Kisumu	No		Yes		1	3	Yes	Other	Hospital/Dispensary	Fever	2	13	38.4	123	Malaria		53920					Lake Endemic	3	0 - 5 years	Wild type	Wild type	Mutant	2014-06-26	2014	2	1	0	2-2014	Fever	10.8953	3. Lake Endemic	MDR184	1. 0 - 5 years
KDH14051395	Kisumu DH	5/8/2014	Kisumu	Female	Kisumu	Yes	<2weeks	Yes		1	5	Yes	Other	Hospital/Dispensary	Fever	1	15	39.1	137	Malaria		193500					Lake Endemic	4	0 - 5 years	Wild type	Wild type	wild type/Mutant	2014-05-08	2014	2	0	0	2-2014	Fever	12.173	3. Lake Endemic		1. 0 - 5 years
KOM1404204	Kombewa DH	4/10/2014	Kisumu	Female	Kisumu	No		Yes		1	4	Yes	Other	Hospital/Dispensary	Diarrhea	5	9.8	36.2	117	Malaria		1200					Lake Endemic	1	0 - 5 years	Wild type	Wild type	wild type/Mutant	2014-04-10	2014	2	0	0	2-2014	Others	7.09008	3. Lake Endemic		1. 0 - 5 years
KDH1006446	Kisumu DH	6/21/2010	Kisumu	Male	Kisumu	No		No				No			Fever	4	18	35.6	94	Malaria		45000					Lake Endemic	3	0 - 5 years	Wild type	Wild type	Mutant	2010-06-21	2010	2	1	0	2-2010	Fever	10.7144	3. Lake Endemic	MDR184	1. 0 - 5 years
KDH13111251	Kisumu DH	11/29/2013	Kisumu	Male	Kisumu	Yes	<2weeks	No				No			Fever	2	17	39.2	136	Malaria		168750					Lake Endemic	4	0 - 5 years	wild type/Mutant	Wild type	Mutant	2013-11-29	2013	4	1	0	4-2013	Fever	12.0362	3. Lake Endemic	MDR184	1. 0 - 5 years
KDH14051402	Kisumu DH	5/14/2014	Kisumu	Female	Kisumu	Yes	<2weeks	No				No			Fever	2	6.9	37.8	152	Malaria		101250					Lake Endemic	0	0 - 5 years	Wild type	Wild type	Mutant	2014-05-14	2014	2	1	0	2-2014	Fever	11.5253	3. Lake Endemic	MDR184	1. 0 - 5 years
KDH0807083	Kisumu DH	7/2/2008	Kisumu	Female	Kisumu	No		Yes	1	3		No			Fever	3	23	39.2	82	Malaria		101250					Lake Endemic	8	6 - 15 years	Mutant	Wild type	Mutant	2008-07-02	2008	3	1	1	3-2008	Fever	11.5253	3. Lake Endemic	MDR184	2. 6 - 15 years
KDH0907243	Kisumu DH	7/14/2009	Kisumu	Female	Kisumu	Yes	2-4 weeks	Yes		7	2	No			Headache	4	36	36.8	90	Malaria		9760					Lake Endemic	10	6 - 15 years	Mutant	undetermined	undetermined	2009-07-14	2009	3	1	1	3-2009	Headache	9.18605	3. Lake Endemic	CRT76	2. 6 - 15 years
KDH14051409	Kisumu DH	5/20/2014	Kisumu	Male	Kisumu	No		Yes		4	1	No			Vomiting	1	20	36.3	124	Malaria		58500			1000		Lake Endemic	6	6 - 15 years	Wild type	Wild type	Mutant	2014-05-20	2014	2	1	0	2-2014	Others	10.9768	3. Lake Endemic	MDR184	2. 6 - 15 years
KDH1008465	Kisumu DH	8/9/2010	Kisumu	Male	Kisumu	No		Yes		1	1	Yes	Chloroquine	Hospital/Dispensary	Vomiting	4	20	38.8	120	Malaria		148500					Lake Endemic	5	0 - 5 years	Mutant	Wild type	Mutant	2010-08-09	2010	3	1	1	3-2010	Others	11.9083	3. Lake Endemic	MDR184	1. 0 - 5 years
KDH14051411	Kisumu DH	5/20/2014	Kisumu	Female	Kisumu	Yes	<2weeks	Yes	3		0	No			Fever	2	60	39.8	124	Malaria		45000					Lake Endemic	22	Above 15 years	Wild type	Wild type	Mutant	2014-05-20	2014	2	1	0	2-2014	Fever	10.7144	3. Lake Endemic	MDR184	3. Above 15 years
KOM1310075	Kombewa DH	10/7/2013	Kisumu	Male	Kisumu	No		Yes		5	4	No			Fever	2	19	37.9	113	Malaria		7640					Lake Endemic	4	0 - 5 years	Wild type	Wild type	Mutant	2013-10-07	2013	4	1	0	4-2013	Fever	8.94115	3. Lake Endemic	MDR184	1. 0 - 5 years
KDH0806069	Kisumu DH	6/13/2008	Kisumu	Female	Kisumu	Yes	1-2 months	Yes		4	7	No				1	77	38.1	95	Malaria		67500					Lake Endemic	30	Above 15 years	Mutant	Mutant	Wild type	2008-06-13	2008	2	1	1	2-2008		11.1199	3. Lake Endemic	MDR86	3. Above 15 years
KDH1103584	Kisumu DH	3/22/2011	Kisumu	Male	Kisumu	No		Yes		3	3	No			Fever	3	11.5	39.2	160	Malaria		166500					Lake Endemic	2	0 - 5 years	wild type/Mutant	wild type/Mutant	Mutant	2011-03-22	2011	1	1	0	1-2011	Fever	12.0228	3. Lake Endemic	MDR184	1. 0 - 5 years
KOM1309045	Kombewa DH	9/2/2013	Kisumu	Male	Kisumu	No		Yes		4	5	No			Headache	4	40.1	36.7	103	Malaria					5000		Lake Endemic	11	6 - 15 years	Wild type	wild type/Mutant	Wild type	2013-09-02	2013	3	0	0	3-2013	Headache		3. Lake Endemic		2. 6 - 15 years
KDH14011276	Kisumu DH	1/10/2014	Kisumu	Male	Kisumu	No		Yes	1		0	No			Headache	3	66	36.2	100	Malaria		11250					Lake Endemic	20	Above 15 years	Wild type	Wild type	Wild type	2014-01-10	2014	1	0	0	1-2014	Headache	9.32812	3. Lake Endemic		3. Above 15 years
KOM1310076	Kombewa DH	10/8/2013	Kisumu	Male	Kisumu	Yes	2-4 weeks	Yes		3	6	Yes	Other	Hospital/Dispensary	Fever	5	15	37.3	100	Malaria		68880					Lake Endemic	3	0 - 5 years	Wild type	Wild type	Mutant	2013-10-08	2013	4	1	0	4-2013	Fever	11.1401	3. Lake Endemic	MDR184	1. 0 - 5 years
KDH0804026	Kisumu DH	4/7/2008	Kisumu	Female	Kisumu	No		Yes		9	1	No			Fever	1	11	39.1	140	Malaria		29250					Lake Endemic	1	0 - 5 years	wild type/Mutant	Wild type	Wild type	2008-04-07	2008	2	0	0	2-2008	Fever	10.2836	3. Lake Endemic		1. 0 - 5 years
KDH1006437	Kisumu DH	6/7/2010	Kisumu	Male	Kisumu	No		Yes		3	2	No			Fever	2	15.5	39	141	Malaria		49500					Lake Endemic	4	0 - 5 years	Wild type	Wild type	Mutant	2010-06-07	2010	2	1	0	2-2010	Fever	10.8097	3. Lake Endemic	MDR184	1. 0 - 5 years
KDH14051421	Kisumu DH	5/30/2014	Kisumu	Male	Kisumu	No		Yes	2		0	No			Headache	4	68	37	96	Malaria		56250					Lake Endemic	32	Above 15 years	Wild type	Wild type	Wild type	2014-05-30	2014	2	0	0	2-2014	Headache	10.9376	3. Lake Endemic		3. Above 15 years
KDH14021320	Kisumu DH	2/6/2014	Kisumu	Female	Kisumu	No		Yes		2	1	No			Headache	4	41	37.5	108	Malaria		281250					Lake Endemic	26	Above 15 years	Wild type	Wild type	Wild type	2014-02-06	2014	1	0	0	1-2014	Headache	12.547	3. Lake Endemic		3. Above 15 years
KOM1404206	Kombewa DH	4/14/2014	Kisumu EAST	Female	Kisumu	No		Yes		3	1	No			Fever	3	14	39.4	122	Malaria		230400					Lake Endemic	4	0 - 5 years	Wild type	Wild type	Mutant	2014-04-14	2014	2	1	0	2-2014	Fever	12.3476	3. Lake Endemic	MDR184	1. 0 - 5 years
KDH1206859	Kisumu DH	6/20/2012	Kisumu	Male	Kisumu	Yes	<2weeks	Yes		8	1	No			Headache	1	67	39	92	Malaria		85500					Lake Endemic	23	Above 15 years	undetermined	Mutant	Wild type	2012-06-20	2012	2	1	2	2-2012	Headache	11.3563	3. Lake Endemic	MDR86	3. Above 15 years
KDH14061425	Kisumu DH	6/4/2014	Kisumu	Female	Kisumu	No		Yes		2	2	No			Fever	14	12.9	37.8	144	Malaria		18000					Lake Endemic	1	0 - 5 years	undetermined	wild type/Mutant	Wild type	2014-06-04	2014	2	0	2	2-2014	Fever	9.79813	3. Lake Endemic		1. 0 - 5 years
KDH14061426	Kisumu DH	6/5/2014	Kisumu	Male	Kisumu	Yes	2-4 weeks	No				No			Fever	1	11.6	40	148	Malaria		78750					Lake Endemic	1	0 - 5 years	Wild type	Wild type	wild type/Mutant	2014-06-05	2014	2	0	0	2-2014	Fever	11.274	3. Lake Endemic		1. 0 - 5 years
KDH1203819	Kisumu DH	3/19/2012	Kisumu	Male	Kisumu	Yes	<2weeks	No				No			Fever	5	9	39.2	180	Malaria	RTI	600750					Lake Endemic	1	0 - 5 years	wild type/Mutant	Wild type	undetermined	2012-03-19	2012	1	0	0	1-2012	Fever	13.3059	3. Lake Endemic		1. 0 - 5 years
KDH1202813	Kisumu DH	2/27/2012	Kisumu	Female	Kisumu	Yes		Yes		1	3	Yes	Quinine	Hospital/Dispensary	Fever	1	16	37.9	140	Malaria		328500					Lake Endemic	4	0 - 5 years	Wild type	undetermined	undetermined	2012-02-27	2012	1	0	0	1-2012	Fever	12.7023	3. Lake Endemic		1. 0 - 5 years
KDH1104600	Kisumu DH	4/15/2011	Kisumu	Male	Kisumu	Yes	<2weeks	Yes		4	2	No			Fever	3	19	36.7	140	Malaria		164250					Lake Endemic	5	0 - 5 years	wild type/Mutant	Wild type	Mutant	2011-04-15	2011	2	1	0	2-2013	Fever	12.0091	3. Lake Endemic	MDR184	1. 0 - 5 years
KDH1104607	Kisumu DH	4/19/2011	Kisumu	Male	Kisumu	No		Yes		2	3	No			Fever	2	13	37.9	160	Malaria		60750					Lake Endemic	2	0 - 5 years	wild type/Mutant	Wild type	Wild type	2011-04-19	2011	2	0	0	2-2013	Fever	11.0145	3. Lake Endemic		1. 0 - 5 years
KDH14071455	Kisumu DH	7/31/2014	Kisumu	Female	Kisumu	No		Yes		7	1	No			Headache	6	62	35.9	72	Malaria		24750					Lake Endemic	21	Above 15 years	Wild type	Wild type	Wild type	2014-07-31	2014	3	0	0	3-2014	Headache	10.1166	3. Lake Endemic		3. Above 15 years
KDH0812161	Kisumu DH	12/10/2008	Kisumu	Female	Kisumu	Yes		Yes		1		Yes		Self	Fever	6	18	36.5	85	Malaria		24750					Lake Endemic	6	6 - 15 years	Mutant	wild type/Mutant	wild type/Mutant	2008-12-10	2008	4	1	1	4-2008	Fever	10.1166	3. Lake Endemic	CRT76	2. 6 - 15 years
KOM1403185	Kombewa DH	3/12/2014	Kisumu	Female	Kisumu	Yes	2-4 weeks	Yes		6	3	No			Fever	3	58	37.3	68	Clinical Malaria							Lake Endemic	28	Above 15 years	undetermined	undetermined	Wild type	2014-03-12	2014	1	0	2	1-2014	Fever		3. Lake Endemic		3. Above 15 years
KOM1403183	Kombewa DH	3/12/2014	Bondo	Female	Siaya	No		No				No			Fever	1	63	37.6	79	Clinical Malaria							Lake Endemic	22	Above 15 years	undetermined	undetermined	Wild type	2014-03-12	2014	1	0	2	1-2014	Fever		3. Lake Endemic		3. Above 15 years
KDH0910260	Kisumu DH	10/1/2009	Kisumu	Female	Kisumu	No		Yes		2	3	No			Fever	3	13	39	96	Malaria		49500					Lake Endemic	4	0 - 5 years	Mutant	Wild type	undetermined	2009-10-01	2009	4	1	1	4-2009	Fever	10.8097	3. Lake Endemic	CRT76	1. 0 - 5 years
KOM1308021	Kombewa DH	8/2/2013	Kisumu	Male	Kisumu	No		Yes	1		0	No			Stomachache	5	59.5	36.7	97	Malaria		760					Lake Endemic	19	Above 15 years	Wild type	wild type/Mutant	wild type/Mutant	2013-08-02	2013	3	0	0	3-2013	Others	6.63332	3. Lake Endemic		3. Above 15 years
KOM1308025	Kombewa DH	8/7/2013	Kisumu west	Male	Kisumu	No		Yes		2	4	No			Fever	2	10.5	40.4	136	Malaria		51600					Lake Endemic	1	0 - 5 years	Wild type	Wild type	Mutant	2013-08-07	2013	3	1	0	3-2013	Fever	10.8513	3. Lake Endemic	MDR184	1. 0 - 5 years
KDH0805046	Kisumu DH	5/19/2008	Kisumu	Female	Kisumu	No		Yes		3	1	No			Fever	5	13	38.5	151	Malaria		166500					Lake Endemic	3	0 - 5 years	Mutant	Mutant	Wild type	2008-05-19	2008	2	1	1	2-2008	Fever	12.0228	3. Lake Endemic	MDR86	1. 0 - 5 years
KDH1205840	Kisumu DH	5/29/2012	Kisumu	Female	Kisumu	No		Yes		2	2	No			Headache	3	55	39.2	148	Malaria		20250					Lake Endemic	20	Above 15 years	wild type/Mutant	Wild type	Wild type	2012-05-29	2012	2	0	0	2-2012	Headache	9.91591	3. Lake Endemic		3. Above 15 years
KDH0804022	Kisumu DH	4/3/2008	Kisumu	Male	Kisumu	No		Yes	2			No			Fever	1	82	40	109	Malaria		324000					Lake Endemic	50	Above 15 years	Mutant	undetermined	Mutant	2008-04-03	2008	2	1	1	2-2008	Fever	12.6885	3. Lake Endemic	MDR184	3. Above 15 years
KDH1010505	Kisumu DH	10/27/2010	Kisumu	Male	Kisumu	No		Yes		3	2	No			Fever	2	12.1	37.1	136	Malaria		209250					Lake Endemic	2	0 - 5 years	Mutant	Wild type	Wild type	2010-10-27	2010	4	1	1	4-2010	Fever	12.2513	3. Lake Endemic	CRT76	1. 0 - 5 years
KOM1309062	Kombewa DH	9/19/2013	Kisumu	Female	Kisumu	No		Yes		4	4	No			Fever	3	13.2	38.5	117	Malaria		9600	480				Lake Endemic	3	0 - 5 years	Wild type	Wild type	wild type/Mutant	2013-09-19	2013	3	0	0	3-2013	Fever	9.16952	3. Lake Endemic		1. 0 - 5 years
KOM1405245	Kombewa DH	5/22/2014	Kisumu	Female	Kisumu	No		Yes		8	3	No			Headache	2	48	39.2	118	Malaria		194560					Lake Endemic	18	Above 15 years	Wild type	Wild type	Mutant	2014-05-22	2014	2	1	0	2-2014	Headache	12.1785	3. Lake Endemic	MDR184	3. Above 15 years
KOM1406271	Kombewa DH	6/19/2014	Kisumu	Female	Kisumu	No		Yes		3	4	No			Headache	2	28	38.1	131	Malaria		111040					Lake Endemic	3	0 - 5 years	Wild type	Wild type	Mutant	2014-06-19	2014	2	1	0	2-2014	Headache	11.6176	3. Lake Endemic	MDR184	1. 0 - 5 years
KDH1104601	Kisumu DH	4/18/2011	Kisumu	Female	Kisumu	Yes	<2weeks	Yes		1	3	Yes	Quinine	Hospital/Dispensary	Fever	2	10	38.8	140	Malaria		56250					Lake Endemic	2	0 - 5 years	Mutant	wild type/Mutant	Mutant	2011-04-18	2011	2	1	1	2-2013	Fever	10.9376	3. Lake Endemic	MDR184	1. 0 - 5 years
KDH0804035	Kisumu DH	4/29/2008	Kisumu	Female	Kisumu	No		Yes	2			No			Headache	3	52	38.5	123	Malaria		96750					Lake Endemic	36	Above 15 years	Mutant	Mutant	Wild type	2008-04-29	2008	2	1	1	2-2008	Headache	11.4799	3. Lake Endemic	MDR86	3. Above 15 years
KOM1402156	Kombewa DH	2/13/2014	Kisumu	Female	Kisumu	No		Yes		1		Yes	Other	Hospital/Dispensary	Fever	3	10	36.6	113	Clinical Malaria	RTI						Lake Endemic	2	0 - 5 years	undetermined	Wild type	Mutant	2014-02-13	2014	1	1	2	1-2014	Fever		3. Lake Endemic	MDR184	1. 0 - 5 years
KDH1104598	Kisumu DH	4/8/2011	Kisumu	Female	Kisumu	Yes	1-2 months	Yes		2	3	No			Vomiting	3	20	37.4	136	Malaria		60750					Lake Endemic	5	0 - 5 years	Wild type	Wild type	wild type/Mutant	2011-04-08	2011	2	0	0	2-2013	Others	11.0145	3. Lake Endemic		1. 0 - 5 years
KOM1310086	Kombewa DH	10/16/2013	Kisumu	Male	Kisumu	Yes	1-2 months	Yes		4	7	No			Fever	2	25	38.1	117	Malaria		230400					Lake Endemic	5	0 - 5 years	Wild type	Wild type	Wild type	2013-10-16	2013	4	0	0	4-2013	Fever	12.3476	3. Lake Endemic		1. 0 - 5 years
KDH1206845	Kisumu DH	6/5/2012	Kisumu	Female	Kisumu	No		Yes	1		0	No			Fever	2	16	38.4	190	Malaria		33750					Lake Endemic	5	0 - 5 years	Wild type	Wild type	Mutant	2012-06-05	2012	2	1	0	2-2012	Fever	10.4267	3. Lake Endemic	MDR184	1. 0 - 5 years
KOM1310088	Kombewa DH	10/17/2013	Kisumu	Female	Kisumu	No		Yes		2	4	No			Fever	3	18.5	39.1	141	Malaria		67880					Lake Endemic	4	0 - 5 years	wild type/Mutant	Wild type	Wild type	2013-10-17	2013	4	0	0	4-2013	Fever	11.1255	3. Lake Endemic		1. 0 - 5 years
KDH14051415	Kisumu DH	5/26/2014	Kisumu	Male	Kisumu	No		Yes		1	5	Yes	Artenam	Hospital/Dispensary	Fever	1	32	38.7	132	Malaria		184500					Lake Endemic	8	6 - 15 years	undetermined	wild type/Mutant	wild type/Mutant	2014-05-26	2014	2	0	2	2-2014	Fever	12.1254	3. Lake Endemic		2. 6 - 15 years
KDH1206853	Kisumu DH	6/14/2012	Kisumu	Male	Kisumu	Yes	1-2 months	Yes		2	5	No			Fever	1	16	39.5	168	Malaria		38250					Lake Endemic	4	0 - 5 years	Wild type	Wild type	Wild type	2012-06-14	2012	2	0	0	2-2012	Fever	10.5519	3. Lake Endemic		1. 0 - 5 years
KDH1201784	Kisumu DH	1/18/2012	Kisumu	Male	Kisumu	No		Yes		2	6	No			Headache	1	55	38.8	112	Malaria		216000					Lake Endemic	26	Above 15 years	wild type/Mutant	Wild type	Wild type	2012-01-18	2012	1	0	0	1-2012	Headache	12.283	3. Lake Endemic		3. Above 15 years
KDH14031348	Kisumu DH	3/11/2014	Kisumu	Male	Kisumu	No		Yes		3	0	No			Fever	1	12.5	36.3	136	Malaria		9000					Lake Endemic	1	0 - 5 years	Wild type	Wild type	Mutant	2014-03-11	2014	1	1	0	1-2014	Fever	9.10498	3. Lake Endemic	MDR184	1. 0 - 5 years
KDH1011517	Kisumu DH	11/22/2010	Kisumu	Male	Kisumu	No		Yes		2	5	No			Fever	2	18	36.7	76	Malaria		2000					Lake Endemic	5	0 - 5 years	Wild type	wild type/Mutant	Wild type	2010-11-22	2010	4	0	0	4-2010	Fever	7.6009	3. Lake Endemic		1. 0 - 5 years
KDH1005425	Kisumu DH	5/20/2010	Kisumu	Male	Kisumu	Yes	<2weeks	Yes	3			No			Headache	4	52	38.8	110	Malaria		6750					Lake Endemic	20	Above 15 years	Wild type	Wild type	undetermined	2010-05-20	2010	2	0	0	2-2010	Headache	8.8173	3. Lake Endemic		3. Above 15 years
KDH0906231	Kisumu DH	6/9/2009	Kisumu	Male	Kisumu	Yes	2-4 weeks	Yes		8	1	No			Fever	4	30	36.3	64	Malaria		600					Lake Endemic	11	6 - 15 years	Wild type	wild type/Mutant	undetermined	2009-06-09	2009	2	0	0	2-2009	Fever	6.39693	3. Lake Endemic		2. 6 - 15 years
KDH1207873	Kisumu DH	7/19/2012	Kisumu	Female	Kisumu	No		Yes	2		0	No			Seizure	2	20	38.8	112	Malaria		6750					Lake Endemic	5	0 - 5 years	Wild type	Wild type	Wild type	2012-07-19	2012	3	0	0	2-2013	Others	8.8173	3. Lake Endemic		1. 0 - 5 years
KDH1001336	Kisumu DH	1/26/2010	Kisumu	Male	Kisumu	Yes	1-2 months	Yes			3	No			Headache	3	20	37.1	122	Malaria		45000					Lake Endemic	6	6 - 15 years	undetermined	Wild type	Wild type	2010-01-26	2010	1	0	2	1-2010	Headache	10.7144	3. Lake Endemic		2. 6 - 15 years
KOM1312119	Kombewa DH	12/10/2013	Kisumu	Male	Kisumu	No		Yes		6	4	No			Fever	4	15	38.1	141	Malaria	RTI						Lake Endemic	3	0 - 5 years	Wild type	wild type/Mutant	wild type/Mutant	2013-12-10	2013	4	0	0	4-2013	Fever		3. Lake Endemic		1. 0 - 5 years
KDH1009490	Kisumu DH	9/22/2010	Kisumu	Female	Kisumu	Yes	2-4 weeks	Yes		3	1	No			Vomiting	1	16	36.5	120	Malaria		33750					Lake Endemic	4	0 - 5 years	undetermined	Wild type	Mutant	2010-09-22	2010	3	1	2	3-2010	Others	10.4267	3. Lake Endemic	MDR184	1. 0 - 5 years
KDH1008470	Kisumu DH	8/10/2010	Kisumu	Male	Kisumu	Yes	<2weeks	Yes		3	5	No			Headache	6	30	36.7	96	Malaria		13500					Lake Endemic	9	6 - 15 years	undetermined	Wild type	Wild type	2010-08-10	2010	3	0	2	3-2010	Headache	9.51044	3. Lake Endemic		2. 6 - 15 years
KDH0805049	Kisumu DH	5/22/2008	Kisumu	Female	Kisumu	No		Yes		1	2	Yes	Quinine	Hospital/Dispensary	Headache	2	23	36.5	140	Malaria		81000					Lake Endemic	7	6 - 15 years	wild type/Mutant	Mutant	Wild type	2008-05-22	2008	2	1	0	2-2008	Headache	11.3022	3. Lake Endemic	MDR86	2. 6 - 15 years
KOM1401124	Kombewa DH	1/9/2014	Kisumu	Male	Kisumu	No		Yes		4	2	No			Coughing	4	20	38	97	Malaria		102240					Lake Endemic	11	6 - 15 years	Wild type	Wild type	Mutant	2014-01-09	2014	1	1	0	1-2014	Coughing	11.5351	3. Lake Endemic	MDR184	2. 6 - 15 years
KOM1401125	Kombewa DH	1/9/2014	Kisumu	Male	Kisumu	No		Yes		3	5	No			Coughing	4	17	38.1	126	Malaria		116160					Lake Endemic	4	0 - 5 years	Wild type	Wild type	Mutant	2014-01-09	2014	1	1	0	1-2014	Coughing	11.6627	3. Lake Endemic	MDR184	1. 0 - 5 years
KOM1405228	Kombewa DH	5/6/2014	Kisumu	Male	Kisumu	No		Yes		3	6	No			Fever	3	15	37.9	113	Malaria		96840					Lake Endemic	4	0 - 5 years	Wild type	Wild type	Wild type	2014-05-06	2014	2	0	0	2-2014	Fever	11.4808	3. Lake Endemic		1. 0 - 5 years
KDH0810143	Kisumu DH	10/27/2008	Kisumu	Male	Kisumu	Yes	2-4 weeks	Yes		3	4	No			Fever	21	12	38.3	147	Malaria		38250					Lake Endemic	3	0 - 5 years	Mutant	Wild type	wild type/Mutant	2008-10-27	2008	4	1	1	4-2008	Fever	10.5519	3. Lake Endemic	CRT76	1. 0 - 5 years
KDH1103588	Kisumu DH	3/24/2010	Kisumu	Female	Kisumu	No		Yes	1	3		No			Fever	3	19	38.8	176	Malaria		22500					Lake Endemic	6	6 - 15 years	Mutant	Wild type	wild type/Mutant	2010-03-24	2010	1	1	1	1-2010	Fever	10.0213	3. Lake Endemic	CRT76	2. 6 - 15 years
KOM1401131	Kombewa DH	1/20/2014	Kisumu	Female	Kisumu	No		Yes		3	4	No			Fever	2	20	38.8	121	Malaria		55200					Lake Endemic	5	0 - 5 years	Wild type	Wild type	Mutant	2014-01-20	2014	1	1	0	1-2014	Fever	10.9187	3. Lake Endemic	MDR184	1. 0 - 5 years
KDH0808099	Kisumu DH	8/15/2008	Kisumu	Female	Kisumu	No		Yes		6	1	No			Headache	1	47	35.4	70	Malaria		27000					Lake Endemic	20	Above 15 years	wild type/Mutant	Wild type	Wild type	2008-08-15	2008	3	0	0	3-2008	Headache	10.2036	3. Lake Endemic		3. Above 15 years
KOM1401134	Kombewa DH	1/20/2014	Kisumu	Female	Kisumu	No		Yes	1		1	No			Fever	2	13	36.5	96	Malaria		7400					Lake Endemic	2	0 - 5 years	Wild type	Wild type	Wild type	2014-01-20	2014	1	0	0	1-2014	Fever	8.90924	3. Lake Endemic		1. 0 - 5 years
KOM1401123	Kombewa DH	1/9/2014	Kisumu	Male	Kisumu	No		Yes		6		No			Fever	2	10	37.4	131	Malaria		194240					Lake Endemic	1	0 - 5 years	wild type/Mutant	Wild type	Wild type	2014-01-09	2014	1	0	0	1-2014	Fever	12.1768	3. Lake Endemic		1. 0 - 5 years
KDH14021329	Kisumu DH	2/17/2014	Kisumu	Male	Kisumu	No		No				No			Fever	1	10	39	168	Malaria		29250					Lake Endemic	1	0 - 5 years	Wild type	Wild type	Wild type	2014-02-17	2014	1	0	0	1-2014	Fever	10.2836	3. Lake Endemic		1. 0 - 5 years
KDH14021326	Kisumu DH	2/12/2014	Kisumu	Male	Kisumu	Yes	1-2 months	Yes			5	No			Headache	1	20	37.3	124	Malaria		31500					Lake Endemic	7	6 - 15 years	Wild type	Wild type	Wild type	2014-02-12	2014	1	0	0	1-2014	Headache	10.3577	3. Lake Endemic		2. 6 - 15 years
KDH1108695	Kisumu DH	8/23/2011	Kisumu	Male	Kisumu	Yes	<2weeks	Yes	1	4		No			Fever	1	23	36.2	132	Malaria		195750					Lake Endemic	7	6 - 15 years	wild type/Mutant	Wild type	undetermined	2011-08-23	2011	3	0	0	3-2011	Fever	12.1846	3. Lake Endemic		2. 6 - 15 years
KDH14041370	Kisumu DH	4/8/2014	Kisumu	Male	Kisumu	Yes	1-2 months	Yes		2	1	No			Fever	2	12.4	38.2	168	Malaria		9000					Lake Endemic	3	0 - 5 years	Wild type	Wild type	Mutant	2014-04-08	2014	2	1	0	2-2014	Fever	9.10498	3. Lake Endemic	MDR184	1. 0 - 5 years
KDH0902182	Kisumu DH	2/17/2009	Kisumu	Male	Kisumu	Yes	2-4 weeks	Yes		1	3	No	Other	Hospital/Dispensary	Fever	1	16	38.8	151	Malaria		54000					Lake Endemic	2	0 - 5 years	Mutant	Wild type	wild type/Mutant	2009-02-17	2009	1	1	1	1-2009	Fever	10.8967	3. Lake Endemic	CRT76	1. 0 - 5 years
KOM1401141	Kombewa DH	1/28/2014	Kisumu	Female	Kisumu	No		Yes		2	4	No			Headache	3	22.5	35.6	94	Malaria		135520					Lake Endemic	9	6 - 15 years	Wild type	Wild type	Mutant	2014-01-28	2014	1	1	0	1-2014	Headache	11.8169	3. Lake Endemic	MDR184	2. 6 - 15 years
KDH0909253	Kisumu DH	9/16/2009	Kisumu	Female	Kisumu	Yes	1-2 months	Yes		1	1	Yes	Artenam	Hospital/Dispensary	Fever	1	15.3	39.6	90	Malaria		54000					Lake Endemic	4	0 - 5 years	wild type/Mutant	Wild type	Wild type	2009-09-16	2009	3	0	0	3-2009	Fever	10.8967	3. Lake Endemic		1. 0 - 5 years
KOM1401143	Kombewa DH	1/30/2014	Kisumu	Male	Kisumu	No		Yes		1	5	Yes	Quinine		Coughing	2	9.2	37.8	114	Malaria							Lake Endemic	1	0 - 5 years	Wild type	Wild type	Mutant	2014-01-30	2014	1	1	0	1-2014	Coughing		3. Lake Endemic	MDR184	1. 0 - 5 years
KDH1108681	Kisumu DH	8/9/2011	Kisumu	Male	Kisumu	No		No				No			Fever	2	13.4	38	132	Malaria		11250					Lake Endemic	1	0 - 5 years	Wild type	Wild type	undetermined	2011-08-09	2011	3	0	0	3-2011	Fever	9.32812	3. Lake Endemic		1. 0 - 5 years
KDH14031352	Kisumu DH	3/17/2014	Siaya	Male	Siaya	No		Yes		8	2	No			Headache	3	29	38.9	144	Malaria		22500					Lake Endemic	11	6 - 15 years	Mutant	Wild type	Mutant	2014-03-17	2014	1	1	1	1-2014	Headache	10.0213	3. Lake Endemic	MDR184	2. 6 - 15 years
KDH1010496	Kisumu DH	10/5/2010	Kisumu	Male	Kisumu	No		Yes			4	Yes	Quinine	Hospital/Dispensary	Fever	1	11.1	39.5	13	Malaria		177750					Lake Endemic	2	0 - 5 years	Mutant	Wild type	Wild type	2010-10-05	2010	4	1	1	4-2010	Fever	12.0881	3. Lake Endemic	CRT76	1. 0 - 5 years
KDH1209882	Kisumu DH	9/11/2012	Kisumu	Male	Kisumu	No		Yes	1	2	0	No			Fever	1	13	39	128	Malaria		33750					Lake Endemic	2	0 - 5 years	undetermined	Wild type	Wild type	2012-09-11	2012	3	0	2	2-2013	Fever	10.4267	3. Lake Endemic		1. 0 - 5 years
KOM1401138	Kombewa DH	1/27/2014	Kisumu	Male	Kisumu	No		Yes		4	3	No			Fever	3	10	39	120	Malaria		143520					Lake Endemic	3	0 - 5 years	Wild type	Wild type	Mutant	2014-01-27	2014	1	1	0	1-2014	Fever	11.8742	3. Lake Endemic	MDR184	1. 0 - 5 years
KDH0910286	Kisumu DH	10/26/2009	Kisumu	Female	Kisumu	No		Yes	3		0	No			Fever	4	80	37.8	80	Malaria		1880					Lake Endemic	23	Above 15 years	Mutant	undetermined	undetermined	2009-10-26	2009	4	1	1	4-2009	Fever	7.53903	3. Lake Endemic	CRT76	3. Above 15 years
KOM1402150	Kombewa DH	2/7/2014	Kisumu	Male	Kisumu	No		Yes			4	Yes	Other	Hospital/Dispensary	Fever	2	15	36.9	121	Clinical Malaria							Lake Endemic	4	0 - 5 years	undetermined	undetermined	Wild type	2014-02-07	2014	1	0	2	1-2014	Fever		3. Lake Endemic		1. 0 - 5 years
KDH0808093	Kisumu DH	8/6/2008	Kisumu	Female	Kisumu	No		Yes		1	1	Yes	Amodiaquine	Hospital/Dispensary	Headache	1	23	37.5	92	Malaria		63000					Lake Endemic	7	6 - 15 years	Wild type	Wild type	Wild type	2008-08-06	2008	3	0	0	3-2008	Headache	11.0509	3. Lake Endemic		2. 6 - 15 years
KDH1004397	Kisumu DH	4/15/2010	Kisumu	Male	Kisumu	Yes	<2weeks	Yes		3	1	No			Vomiting	4	17.5	37.8	134	Malaria		74250					Lake Endemic	5	0 - 5 years	Mutant	Wild type	Mutant	2010-04-15	2010	2	1	1	2-2010	Others	11.2152	3. Lake Endemic	MDR184	1. 0 - 5 years
KDH1005429	Kisumu DH	5/27/2010	Kisumu	Female	Kisumu	No		Yes		2		No			Fever	2	108	37.4	96	Malaria		60750					Lake Endemic	2	0 - 5 years	Mutant	Mutant	Wild type	2010-05-27	2010	2	1	1	2-2010	Fever	11.0145	3. Lake Endemic	MDR86	1. 0 - 5 years
KDH1201773	Kisumu DH	1/11/2012	Kisumu	Female	Kisumu	Yes	<2weeks	Yes		3	6	No			Vomiting	4	19	35	100	Malaria		15750					Lake Endemic	5	0 - 5 years	wild type/Mutant	Wild type	wild type/Mutant	2012-01-11	2012	1	0	0	1-2012	Others	9.6646	3. Lake Endemic		1. 0 - 5 years
KDH14031343	Kisumu DH	3/6/2014	Kisumu	Female	Kisumu	Yes	1-2 months	No				No			Fever	4	22	39.2	124	Malaria		58500					Lake Endemic	7	6 - 15 years	Wild type	Wild type	wild type/Mutant	2014-03-06	2014	1	0	0	1-2014	Fever	10.9768	3. Lake Endemic		2. 6 - 15 years
KDH13111237	Kisumu DH	11/18/2013	Kisumu	Male	Kisumu	Yes	1-2 months	No				No			Fever	1	8.8	39.1	148	Malaria							Lake Endemic	1	0 - 5 years	undetermined	Wild type	wild type/Mutant	2013-11-18	2013	4	0	2	4-2013	Fever		3. Lake Endemic		1. 0 - 5 years
KDH0905221	Kisumu DH	5/25/2009	Kisumu	Male	Kisumu	Yes	2-4 weeks	Yes		6	2	Yes	Other	Hospital/Dispensary	Fever		117	37.6	102	Malaria		96750					Lake Endemic	2	0 - 5 years	Mutant	wild type/Mutant	Wild type	2009-05-25	2009	2	1	1	2-2009	Fever	11.4799	3. Lake Endemic	CRT76	1. 0 - 5 years
KDH1004406	Kisumu DH	4/26/2010	Kisumu	Male	Kisumu	Yes		Yes		3	3	No			Headache	2	25	39.3	126	Malaria		45000					Lake Endemic	9	6 - 15 years	Mutant	Mutant	Wild type	2010-04-26	2010	2	1	1	2-2010	Headache	10.7144	3. Lake Endemic	MDR86	2. 6 - 15 years
KOM1401136	Kombewa DH	1/22/2014	Kisumu	Male	Kisumu	No		Yes		2	3	No			Vomiting	3	9	37.5	99	Malaria		184800					Lake Endemic	2	0 - 5 years	Wild type	Wild type	Wild type	2014-01-22	2014	1	0	0	1-2014	Others	12.127	3. Lake Endemic		1. 0 - 5 years
KOM1402167	Kombewa DH	2/25/2014	Kisumu	Male	Kisumu	No		Yes		2	4	No			Fever	1	15	38.1	101	Malaria		60800					Lake Endemic	6	6 - 15 years	Wild type	Wild type	Wild type	2014-02-25	2014	1	0	0	1-2014	Fever	11.0153	3. Lake Endemic		2. 6 - 15 years
KOM1403168	Kombewa DH	3/3/2014	Kisumu	Male	Kisumu	No		Yes			5	Yes	Other	Hospital/Dispensary	Fever	3	18	39.3	127	Malaria		87360					Lake Endemic	3	0 - 5 years	Wild type	Wild type	Mutant	2014-03-03	2014	1	1	0	1-2014	Fever	11.3778	3. Lake Endemic	MDR184	1. 0 - 5 years
KDH0911312	Kisumu DH	11/27/2009	Kisumu	Male	Kisumu	No		Yes		3	2	No			Fever	3	22	39.2	96	Malaria		20250					Lake Endemic	7	6 - 15 years	Mutant	Wild type	Mutant	2009-11-27	2009	4	1	1	4-2009	Fever	9.91591	3. Lake Endemic	MDR184	2. 6 - 15 years
KOM1403171	Kombewa DH	3/4/2014	Kisumu	Male	Kisumu	No		Yes		4	3	No			Fever	3	10	38.7	121	Malaria		1120					Lake Endemic	3	0 - 5 years	Wild type	Wild type	wild type/Mutant	2014-03-04	2014	1	0	0	1-2014	Fever	7.02108	3. Lake Endemic		1. 0 - 5 years
KDH1102568	Kisumu DH	2/14/2011	Kisumu	Male	Kisumu	No		Yes		7	1	No			Fever	3	21.5	39.7	120	Malaria		9000					Lake Endemic	5	0 - 5 years	wild type/Mutant	Wild type	Wild type	2011-02-14	2011	1	0	0	1-2011	Fever	9.10498	3. Lake Endemic		1. 0 - 5 years
KDH0911295	Kisumu DH	11/12/2009	Kisumu	Female	Kisumu	No		Yes		11	1	No			Headache	1	61	39.6	104	Malaria		33750					Lake Endemic	23	Above 15 years	wild type/Mutant	Wild type	undetermined	2009-11-12	2009	4	0	0	4-2009	Headache	10.4267	3. Lake Endemic		3. Above 15 years
KDH1112761	Kisumu DH	12/7/2011	Kisumu	Female	Kisumu	No		Yes		2	2	No			Fever	2	54	38.8	120	Malaria	RTI	15750					Lake Endemic	17	Above 15 years	Wild type	Wild type	undetermined	2011-12-07	2011	4	0	0	4-2011	Fever	9.6646	3. Lake Endemic		3. Above 15 years
KDH1204826	Kisumu DH	4/23/2012	Kisumu	Female	Kisumu	No		Yes	1	6		No			Fever	2	14	36.2	118	Malaria	RTI	31500					Lake Endemic	3	0 - 5 years	undetermined	Wild type	wild type/Mutant	2012-04-23	2012	2	0	2	2-2012	Fever	10.3577	3. Lake Endemic		1. 0 - 5 years
KDH1007462	Kisumu DH	7/13/2010	Kisumu	Female	Kisumu	No		Yes	1			No			Fever	3	15	38.4	136	Malaria		42750					Lake Endemic	5	0 - 5 years	Mutant	Wild type	wild type/Mutant	2010-07-13	2010	3	1	1	3-2010	Fever	10.6631	3. Lake Endemic	CRT76	1. 0 - 5 years
KDH1110723	Kisumu DH	10/10/2011	Kisumu	Female	Kisumu	No		No				No			Fever	2	7.6	37.5	108	Malaria		218250					Lake Endemic	0	0 - 5 years	Wild type	wild type/Mutant	Wild type	2011-10-10	2011	4	0	0	4-2011	Fever	12.2934	3. Lake Endemic		1. 0 - 5 years
KOM1310083	Kombewa DH	10/14/2013	Kisumu	Male	Kisumu	No		Yes		3	5	No			Fever	5	22	37.2	107	RTI	RTI						Lake Endemic	6	6 - 15 years	Wild type	Wild type	Wild type	2013-10-14	2013	4	0	0	4-2013	Fever		3. Lake Endemic		2. 6 - 15 years
KDH1111747	Kisumu DH	11/9/2011	Kisumu	Male	Kisumu	No		Yes		7	1	No			Fever	1	16	39.2	122	Malaria		13500					Lake Endemic	2	0 - 5 years	wild type/Mutant	Wild type	Mutant	2011-11-09	2011	4	1	0	4-2011	Fever	9.51044	3. Lake Endemic	MDR184	1. 0 - 5 years
KDH1109713	Kisumu DH	9/29/2011	Kisumu	Female	Kisumu	No		Yes		3	4	No			Fever	2	12	39.4	172	Malaria		42750					Lake Endemic	3	0 - 5 years	wild type/Mutant	wild type/Mutant	Wild type	2011-09-29	2011	3	0	0	3-2011	Fever	10.6631	3. Lake Endemic		1. 0 - 5 years
KDH1005416	Kisumu DH	5/4/2010	Kisumu	Male	Kisumu	No		No				No			Fever	2	9.8	37.1	164	Malaria		22500					Lake Endemic	1	0 - 5 years	Wild type	wild type/Mutant	Wild type	2010-05-04	2010	2	0	0	2-2010	Fever	10.0213	3. Lake Endemic		1. 0 - 5 years
KDH1107659	Kisumu DH	7/11/2011	Kisumu	Male	Kisumu	Yes	<2weeks	No				No			Fever	3	11	39.6	184			33750					Lake Endemic	1	0 - 5 years	wild type/Mutant	wild type/Mutant	undetermined	2011-07-11	2011	3	0	0	3-2011	Fever	10.4267	3. Lake Endemic		1. 0 - 5 years
KOM1405243	Kombewa DH	5/21/2014	Kisumu	Female	Kisumu	No		Yes		1	3	Yes	Other	Hospital/Dispensary	Fever	2	10	38.8	124	Malaria		102560					Lake Endemic	1	0 - 5 years	Wild type	Wild type	wild type/Mutant	2014-05-21	2014	2	0	0	2-2014	Fever	11.5382	3. Lake Endemic		1. 0 - 5 years
KDH1109710	Kisumu DH	9/22/2011	Kisumu	Female	Kisumu	Yes	<2weeks	Yes		6	2	No			Fever	3	14	37	128	Malaria		312750					Lake Endemic	3	0 - 5 years	wild type/Mutant	Wild type	wild type/Mutant	2011-09-22	2011	3	0	0	3-2011	Fever	12.6532	3. Lake Endemic		1. 0 - 5 years
KDH0805048	Kisumu DH	5/20/2008	Kisumu	Male	Kisumu	Yes	2-4 weeks	Yes		5	1	No			Headache	5	16	39.8	140	Malaria		175500					Lake Endemic	4	0 - 5 years	wild type/Mutant	Mutant	Wild type	2008-05-20	2008	2	1	0	2-2008	Headache	12.0754	3. Lake Endemic	MDR86	1. 0 - 5 years
KDH1102570	Kisumu DH	2/17/2011	Kisumu	Male	Kisumu	No		No				No			Fever	3	67	37.7	120	Malaria		9000					Lake Endemic	0	0 - 5 years	Mutant	Mutant	Mutant	2011-02-17	2011	1	1	1	1-2011	Fever	9.10498	3. Lake Endemic	MDR184	1. 0 - 5 years
KDH0806064	Kisumu DH	6/10/2008	Kisumu	Male	Kisumu	No		Yes	6			No			Headache	6	62	36.2	90	Malaria		389250					Lake Endemic	19	Above 15 years	Wild type	Wild type	Mutant	2008-06-10	2008	2	1	0	2-2008	Headache	12.872	3. Lake Endemic	MDR184	3. Above 15 years
KOM1403184	Kombewa DH	3/12/2014	Kisumu	Female	Kisumu	No		Yes		3	5	No			Stomachache	2	18	37.9	107	Malaria		3680					Lake Endemic	4	0 - 5 years	Wild type	Wild type	Mutant	2014-03-12	2014	1	1	0	1-2014	Others	8.21067	3. Lake Endemic	MDR184	1. 0 - 5 years
KOM1403197	Kombewa DH	3/27/2014	Kisumu	Male	Kisumu	No		Yes		1	6	Yes	Quinine	Pharmacist	Fever	2	24	37.8	127	Malaria		6920					Lake Endemic	6	6 - 15 years	Wild type	Wild type	Mutant	2014-03-27	2014	1	1	0	1-2014	Fever	8.84217	3. Lake Endemic	MDR184	2. 6 - 15 years
KDH1206854	Kisumu DH	6/14/2012	Kisumu	Male	Kisumu	No		Yes			1	Yes	Quinine	Hospital/Dispensary	Fever	5	16	36.5	128	Malaria	Tinea Capitis	27000					Lake Endemic	3	0 - 5 years	Wild type	Wild type	Mutant	2012-06-14	2012	2	1	0	2-2012	Fever	10.2036	3. Lake Endemic	MDR184	1. 0 - 5 years
KOM1404199	Kombewa DH	4/7/2014	Kisumu	Female	Kisumu	No		Yes		2	3	No			Fever	4	13	39	123	Malaria		225280					Lake Endemic	3	0 - 5 years	Wild type	Wild type	wild type/Mutant	2014-04-07	2014	2	0	0	2-2014	Fever	12.3251	3. Lake Endemic		1. 0 - 5 years
KDH1105642	Kisumu DH	5/30/2011	Kisumu	Female	Kisumu	No		Yes		1		Yes	Quinine	Hospital/Dispensary	Headache	7	24	35	132	Malaria		36000					Lake Endemic	7	6 - 15 years	Wild type	Mutant	undetermined	2011-05-30	2011	2	1	0	2-2013	Headache	10.4913	3. Lake Endemic	MDR86	2. 6 - 15 years
KDH13111238	Kisumu DH	11/18/2013	Kisumu	Female	Kisumu	Yes	2-4 weeks	Yes	1	6	0	No			Fever	2	47	38.5	124	Malaria		42750					Lake Endemic	22	Above 15 years	Wild type	Wild type	Mutant	2013-11-18	2013	4	1	0	4-2013	Fever	10.6631	3. Lake Endemic	MDR184	3. Above 15 years
KDH0805055	Kisumu DH	5/28/2008	Kisumu	Female	Kisumu	Yes	<2weeks	Yes		3	4	No			Fever	4	15	38.8	79			387000					Lake Endemic	4	0 - 5 years	undetermined	wild type/Mutant	wild type/Mutant	2008-05-28	2008	2	0	2	2-2008	Fever	12.8662	3. Lake Endemic		1. 0 - 5 years
KDH1208880	Kisumu DH	8/6/2012	Kisumu	Female	Kisumu	Yes	2-4 weeks	Yes	6		0	No			Headache	5	59	39.2	112	Malaria		33750					Lake Endemic	16	Above 15 years	wild type/Mutant	Mutant	Wild type	2012-08-06	2012	3	1	0	2-2013	Headache	10.4267	3. Lake Endemic	MDR86	3. Above 15 years
KOM1404205	Kombewa DH	4/10/2014	Kisumu	Female	Kisumu	No		Yes	20		0	No			Headache	3	69	37	116	Malaria		64480					Lake Endemic	35	Above 15 years	Wild type	Wild type	Mutant	2014-04-10	2014	2	1	0	2-2014	Headache	11.0741	3. Lake Endemic	MDR184	3. Above 15 years
KDH14031344	Kisumu DH	3/6/2014	Kisumu	Female	Kisumu	Yes	<2weeks	No				No			Fever	2	7	39.6	146	Malaria		22500					Lake Endemic	0	0 - 5 years	Wild type	Wild type	Mutant	2014-03-06	2014	1	1	0	1-2014	Fever	10.0213	3. Lake Endemic	MDR184	1. 0 - 5 years
KDH1107669	Kisumu DH	7/19/2011	Kisumu	Female	Kisumu	No		Yes		6	2	No			Fever	3	10	39	132	Malaria		40500					Lake Endemic	2	0 - 5 years	Wild type	Wild type	undetermined	2011-07-19	2011	3	0	0	3-2011	Fever	10.6091	3. Lake Endemic		1. 0 - 5 years
KDH0902177	Kisumu DH	2/9/2009	Kisumu	Male	Kisumu	No		Yes			5	No			Seizure	1	17	39.3	101	Malaria		90000					Lake Endemic	4	0 - 5 years	Mutant	Wild type	undetermined	2009-02-09	2009	1	1	1	1-2009	Others	11.4076	3. Lake Endemic	CRT76	1. 0 - 5 years
KDH1003372	Kisumu DH	3/16/2010	Kisumu	Female	Kisumu	No		Yes		7	1	No			Fever	1	15	37.4	82	Malaria		157500					Lake Endemic	4	0 - 5 years	undetermined	Mutant	Wild type	2010-03-16	2010	1	1	2	1-2010	Fever	11.9672	3. Lake Endemic	MDR86	1. 0 - 5 years
KDH14021340	Kisumu DH	2/27/2014	Kisumu	Male	Kisumu	No		Yes		2	3	No			Fever	3	22	37.4	121	Malaria		9000					Lake Endemic	6	6 - 15 years	Wild type	Wild type	wild type/Mutant	2014-02-27	2014	1	0	0	1-2014	Fever	9.10498	3. Lake Endemic		2. 6 - 15 years
KOM1404215	Kombewa DH	4/22/2014	Kisumu	Female	Kisumu	No		Yes	2			No			Fever	3	13	38.9	102	Malaria		82080					Lake Endemic	2	0 - 5 years	Wild type	Wild type	Wild type	2014-04-22	2014	2	0	0	2-2014	Fever	11.3154	3. Lake Endemic		1. 0 - 5 years
KOM1404217	Kombewa DH	4/24/2014	Kisumu	Male	Kisumu	No		Yes	1		1	No			Fever	4	17	40	96	Malaria		106880					Lake Endemic	5	0 - 5 years	Wild type	Wild type	Mutant	2014-04-24	2014	2	1	0	2-2014	Fever	11.5795	3. Lake Endemic	MDR184	1. 0 - 5 years
KDH1107657	Kisumu DH	7/8/2011	Kisumu	Male	Kisumu	No		Yes		2		No			Fever	1	16	38.2	154	Malaria		470250					Lake Endemic	5	0 - 5 years	Wild type	Wild type	undetermined	2011-07-08	2011	3	0	0	3-2011	Fever	13.061	3. Lake Endemic		1. 0 - 5 years
KOM1403181	Kombewa DH	3/10/2014	Kisumu	Female	Kisumu	No		Yes		1	3	Yes	Other	Hospital/Dispensary	Fever	5	12	38.2	122	Malaria		34720					Lake Endemic	3	0 - 5 years	Wild type	Wild type	wild type/Mutant	2014-03-10	2014	1	0	0	1-2014	Fever	10.4551	3. Lake Endemic		1. 0 - 5 years
KOM1404220	Kombewa DH	4/29/2014	Kisumu	Male	Kisumu	No		Yes		3	4	No			Fever	4	14	37.4	111	Malaria		7920					Lake Endemic	4	0 - 5 years	Wild type	Wild type	Mutant	2014-04-29	2014	2	1	0	2-2014	Fever	8.97715	3. Lake Endemic	MDR184	1. 0 - 5 years
KDH1003367	Kisumu DH	3/12/2010		Female	Kisumu	No		Yes			3	No			Headache	3	18	36.3	116	Malaria		9000					Lake Endemic	6	6 - 15 years	undetermined	Wild type	undetermined	2010-03-12	2010	1	0	2	1-2010	Headache	9.10498	3. Lake Endemic		2. 6 - 15 years
KDH14031363	Kisumu DH	3/25/2014	Kisumu	Female	Kisumu	No		Yes		5	3	No			Fever	3	13	38.7	162	Malaria		49500					Lake Endemic	3	0 - 5 years	Wild type	Wild type	wild type/Mutant	2014-03-25	2014	1	0	0	1-2014	Fever	10.8097	3. Lake Endemic		1. 0 - 5 years
KDH1104596	Kisumu DH	4/8/2011	Kisumu	Female	Kisumu	Yes	<2weeks	Yes	4			No			Fever	1	26	39.8	168	Malaria		22500					Lake Endemic	8	6 - 15 years	Mutant	Mutant	Wild type	2011-04-08	2011	2	1	1	2-2013	Fever	10.0213	3. Lake Endemic	MDR86	2. 6 - 15 years
KDH0904209	Kisumu DH	4/29/2009	Kisumu	Female	Kisumu	Yes	1-2 months	Yes	2			No			Headache	2	67	37.6	60	Malaria		47250					Lake Endemic	20	Above 15 years	Wild type	Wild type	Mutant	2009-04-29	2009	2	1	0	2-2009	Headache	10.7632	3. Lake Endemic	MDR184	3. Above 15 years
KOM1405226	Kombewa DH	5/5/2014	Kisumu	Male	Kisumu	No		Yes		4	3	No			Fever	0	10	37.2	111	Malaria		68560					Lake Endemic	1	0 - 5 years	Wild type	Wild type	wild type/Mutant	2014-05-05	2014	2	0	0	2-2014	Fever	11.1355	3. Lake Endemic		1. 0 - 5 years
KDH1012535	Kisumu DH	12/8/2010	Kisumu	Male	Kisumu	No		Yes		8	1	No			Fever	1	10.2	39	120	Malaria		38250					Lake Endemic	1	0 - 5 years	Wild type	Wild type	Wild type	2010-12-08	2010	4	0	0	4-2010	Fever	10.5519	3. Lake Endemic		1. 0 - 5 years
KDH14051392	Kisumu DH	5/8/2014	Kisumu	Female	Kisumu	Yes	1-2 months	Yes		2	2	No			Fever	2	12	36.8	146	Malaria		9000					Lake Endemic	1	0 - 5 years	Wild type	Wild type	Wild type	2014-05-08	2014	2	0	0	2-2014	Fever	9.10498	3. Lake Endemic		1. 0 - 5 years
KOM1405233	Kombewa DH	5/14/2014	Kisumu	Male	Kisumu	No		Yes		3	3	No			Fever	3	13	38.3	103	Malaria		108480					Lake Endemic	2	0 - 5 years	Wild type	Wild type	wild type/Mutant	2014-05-14	2014	2	0	0	2-2014	Fever	11.5943	3. Lake Endemic		1. 0 - 5 years
KDH1004404	Kisumu DH	4/22/2010	Kisumu	Female	Kisumu	Yes	2-4 weeks	Yes	2			No			Headache	4	59	35.7	73	Malaria		15750					Lake Endemic	56	Above 15 years	undetermined	Wild type	Mutant	2010-04-22	2010	2	1	2	2-2010	Headache	9.6646	3. Lake Endemic	MDR184	3. Above 15 years
KDH0910283	Kisumu DH	10/23/2009	Kisumu	Female	Kisumu	No		Yes	1		1	No				7	13.5	37.2	102	Malaria		31500					Lake Endemic	3	0 - 5 years	wild type/Mutant	Wild type	undetermined	2009-10-23	2009	4	0	0	4-2009		10.3577	3. Lake Endemic		1. 0 - 5 years
KOM1405238	Kombewa DH	5/19/2014	Kisumu	Female	Kisumu	Yes	1-2 months	Yes	1		10	No			Fever	2	90	38.4	88	Malaria		17440					Lake Endemic	32	Above 15 years	Wild type	Wild type	wild type/Mutant	2014-05-19	2014	2	0	0	2-2014	Fever	9.76652	3. Lake Endemic		3. Above 15 years
KDH0903190	Kisumu DH	3/16/2009	Kisumu	Female	Kisumu	No		Yes	2			No			Headache	2	20	36.6	105	Malaria		90000					Lake Endemic	7	6 - 15 years	Mutant	Mutant	Wild type	2009-03-16	2009	1	1	1	1-2009	Headache	11.4076	3. Lake Endemic	MDR86	2. 6 - 15 years
KDH1001328	Kisumu DH	1/11/2010	Kisumu	Male	Kisumu	No		Yes		4	3	No			Fever		13	37.9	128	Malaria		13500					Lake Endemic	2	0 - 5 years	wild type/Mutant	Mutant	Wild type	2010-01-11	2010	1	1	0	1-2010	Fever	9.51044	3. Lake Endemic	MDR86	1. 0 - 5 years
KDH1004393	Kisumu DH	4/13/2010	Kisumu	Female	Kisumu	No		Yes		2	4	No			Vomiting	2	45	39.4	112	Malaria		22500					Lake Endemic	13	6 - 15 years	Mutant	Wild type	Mutant	2010-04-13	2010	2	1	1	2-2010	Others	10.0213	3. Lake Endemic	MDR184	2. 6 - 15 years
KDH0805043	Kisumu DH	5/13/2008	Kisumu	Male	Kisumu	No		Yes		9	3	No			Fever	2	12	38.2	137	Malaria	RTI	477000					Lake Endemic	4	0 - 5 years	undetermined	Mutant	Wild type	2008-05-13	2008	2	1	2	2-2008	Fever	13.0753	3. Lake Endemic	MDR86	1. 0 - 5 years
KOM1403193	Kombewa DH	3/19/2014	Kisumu	Male	Kisumu	No		Yes		10	2	No			Diarrhea	3	12	39.3	134	Malaria		69760					Lake Endemic	0	0 - 5 years	Wild type	Wild type	wild type/Mutant	2014-03-19	2014	1	0	0	1-2014	Others	11.1528	3. Lake Endemic		1. 0 - 5 years
KDH0901170	Kisumu DH	1/21/2009	Kisumu	Female	Kisumu	Yes	2-4 weeks	Yes		2	10	No			Headache	7	29	36	97	Malaria		85500					Lake Endemic	9	6 - 15 years	wild type/Mutant	Wild type	undetermined	2009-01-21	2009	1	0	0	1-2009	Headache	11.3563	3. Lake Endemic		2. 6 - 15 years
KDH1105623	Kisumu DH	5/5/2011	Kisumu	Male	Kisumu	No		Yes		4	2	No			Fever	1	15	38.1	148	Malaria		38250					Lake Endemic	3	0 - 5 years	Mutant	wild type/Mutant	undetermined	2011-05-05	2011	2	1	1	2-2013	Fever	10.5519	3. Lake Endemic	CRT76	1. 0 - 5 years
KOM1403182	Kombewa DH	4/10/2014	Kisumu	Female	Kisumu	Yes	1-2 months	Yes		4	3	No			Fever	3	28	37.8	117	Malaria		35360					Lake Endemic	10	6 - 15 years	Wild type	Wild type	Wild type	2014-04-10	2014	2	0	0	2-2014	Fever	10.4733	3. Lake Endemic		2. 6 - 15 years
KOM1311117	Kombewa DH	11/26/2013	Kisumu	Male	Kisumu	No		Yes		3	5	No			Fever	4	20	38.1	101	Malaria		149440					Lake Endemic	4	0 - 5 years	Wild type	Wild type	Mutant	2013-11-26	2013	4	1	0	4-2013	Fever	11.9146	3. Lake Endemic	MDR184	1. 0 - 5 years
KOM1406255	Kombewa DH	6/10/2014	Kisumu	Male	Kisumu	No		Yes		5	2	No			Fever	3	20	39.1	112	Malaria		102080					Lake Endemic	6	6 - 15 years	Wild type	Wild type	Mutant	2014-06-10	2014	2	1	0	2-2014	Fever	11.5335	3. Lake Endemic	MDR184	2. 6 - 15 years
KOM1406254	Kombewa DH	6/9/2014	Kisumu	Male	Kisumu	No		Yes		4	3	No			Fever	2	19	38	92	Malaria		152960					Lake Endemic	6	6 - 15 years	Mutant	Wild type	Wild type	2014-06-09	2014	2	1	1	2-2014	Fever	11.9379	3. Lake Endemic	CRT76	2. 6 - 15 years
KDH1004409	Kisumu DH	4/30/2010	Kisumu	Female	Kisumu	Yes	1-2 months	Yes	1			No			Fever	3	20	39.2	140	Malaria		56250					Lake Endemic	6	6 - 15 years	Mutant	Mutant	Wild type	2010-04-30	2010	2	1	1	2-2010	Fever	10.9376	3. Lake Endemic	MDR86	2. 6 - 15 years
KOM1404208	Kombewa DH	4/15/2014	Kisumu	Male	Kisumu	No		Yes	2		0	No			Fever	2	13	38	100	Malaria		4800					Lake Endemic	3	0 - 5 years	Wild type	Wild type	Mutant	2014-04-15	2014	2	1	0	2-2014	Fever	8.47637	3. Lake Endemic	MDR184	1. 0 - 5 years
KDH1004403	Kisumu DH	4/22/2010	Kisumu	Male	Kisumu	Yes	<2weeks	Yes		5	4	No			Fever	1	14	38.9	157	Malaria		103500					Lake Endemic	2	0 - 5 years	Mutant	Wild type	Wild type	2010-04-22	2010	2	1	1	2-2010	Fever	11.5473	3. Lake Endemic	CRT76	1. 0 - 5 years
KOM1406263	Kombewa DH	6/12/2014	Kisumu	Female	Kisumu	No		Yes		6	1	No			Fever	2	52	37.7	133	Malaria		6400					Lake Endemic	20	Above 15 years	Wild type	Wild type	Wild type	2014-06-12	2014	2	0	0	2-2014	Fever	8.76405	3. Lake Endemic		3. Above 15 years
KOM1406266	Kombewa DH	6/16/2014	Kisumu	Female	Kisumu	No		Yes		1	6	Yes	Other	Hospital/Dispensary	Fever	2	20	38.1	141	Malaria		320760					Lake Endemic	7	6 - 15 years	Wild type	Wild type	Wild type	2014-06-16	2014	2	0	0	2-2014	Fever	12.6784	3. Lake Endemic		2. 6 - 15 years
KDH1006447	Kisumu DH	6/22/2010	Kisumu	Female	Kisumu	No		Yes		7		No			Fever	4	12.7	39.3	168	Malaria		45000					Lake Endemic	3	0 - 5 years	Wild type	Wild type	Mutant	2010-06-22	2010	2	1	0	2-2010	Fever	10.7144	3. Lake Endemic	MDR184	1. 0 - 5 years
KDH1201776	Kisumu DH	1/11/2012	Kisumu	Male	Kisumu	Yes	<2weeks	Yes		8	2	No			Fever	3	15	36.6	108	Malaria	Tinea Capitis	11250					Lake Endemic	4	0 - 5 years	wild type/Mutant	Wild type	Wild type	2012-01-11	2012	1	0	0	1-2012	Fever	9.32812	3. Lake Endemic		1. 0 - 5 years
KDH14011275	Kisumu DH	1/9/2014	Kisumu	Male	Kisumu	No		Yes		4	2	No			Headache	2	25	37.4	120	Malaria		173250					Lake Endemic	8	6 - 15 years	wild type/Mutant	wild type/Mutant	Wild type	2014-01-09	2014	1	0	0	1-2014	Headache	12.0625	3. Lake Endemic		2. 6 - 15 years
KOM1406276	Kombewa DH	6/24/2014	Kisumu	Male	Kisumu	No		Yes	4		0	No			Fever	2	65	37.5	60	Malaria		38560					Lake Endemic	57	Above 15 years	Wild type	wild type/Mutant	wild type/Mutant	2014-06-24	2014	2	0	0	2-2014	Fever	10.56	3. Lake Endemic		3. Above 15 years
KDH0906232	Kisumu DH	6/15/2009	Kisumu	Male	Kisumu	No		Yes	1	5		No			Headache	3	41	36.1	80	Malaria		292500					Lake Endemic	15	6 - 15 years	Wild type	Wild type	undetermined	2009-06-15	2009	2	0	0	2-2009	Headache	12.5862	3. Lake Endemic		2. 6 - 15 years
KDH0912323	Kisumu DH	12/7/2009	Kisumu	Male	Kisumu	Yes	<2weeks	Yes		7	1	No			Fever	3	9.5	38.6	153	Malaria		141750					Lake Endemic	2	0 - 5 years	Mutant	Wild type	wild type/Mutant	2009-12-07	2009	4	1	1	4-2009	Fever	11.8618	3. Lake Endemic	CRT76	1. 0 - 5 years
KDH1105641	Kisumu DH	5/26/2011	Kisumu	Male	Kisumu	No		Yes	1	2		No			Fever	7	14	38.8	140	Malaria		130500					Lake Endemic	3	0 - 5 years	Wild type	Mutant	undetermined	2011-05-26	2011	2	1	0	2-2013	Fever	11.7791	3. Lake Endemic	MDR86	1. 0 - 5 years
KDH14051408	Kisumu DH	5/19/2014	Kisumu	Male	Kisumu	Yes	<2weeks	Yes	5		0	No			Fever	7	18	37.6	141	Malaria		22500					Lake Endemic	6	6 - 15 years	Wild type	Wild type	Mutant	2014-05-19	2014	2	1	0	2-2014	Fever	10.0213	3. Lake Endemic	MDR184	2. 6 - 15 years
KDH1105640	Kisumu DH	5/25/2011	Kisumu	Male	Kisumu	Yes	<2weeks	Yes		4	1	No			Fever	5	13	38.3	140	Malaria		800					Lake Endemic	2	0 - 5 years	Wild type	Wild type	undetermined	2011-05-25	2011	2	0	0	2-2013	Fever	6.68461	3. Lake Endemic		1. 0 - 5 years
KDH1101550	Kisumu DH	1/17/2011	Kisumu	Male	Kisumu	No		Yes	2			No			Fever	14	19	35.6	160	Malaria		155250					Lake Endemic	4	0 - 5 years	undetermined	undetermined	wild type/Mutant	2011-01-17	2011	1	0	2	1-2011	Fever	11.9528	3. Lake Endemic		1. 0 - 5 years
KDH14061427	Kisumu DH	6/6/2014	Kisumu	Male	Kisumu	No		Yes		4	2	No			Fever	7	21	36.3	112	Malaria							Lake Endemic	6	6 - 15 years	Wild type	Wild type	Mutant	2014-06-06	2014	2	1	0	2-2014	Fever		3. Lake Endemic	MDR184	2. 6 - 15 years
KDH0905214	Kisumu DH	5/14/2009	Kisumu	Male	Kisumu	Yes	1-2 months	Yes		2	3	No			Headache	7	49	35.5	66	Malaria		54000					Lake Endemic	18	Above 15 years	Mutant	wild type/Mutant	Mutant	2009-05-14	2009	2	1	1	2-2009	Headache	10.8967	3. Lake Endemic	MDR184	3. Above 15 years
KDH0809130	Kisumu DH	9/17/2008	Kisumu	Male	Kisumu	No		Yes		1	3	Yes	Chloroquine	Hospital/Dispensary	Fever	1	14	37.5	139	Malaria		99000					Lake Endemic	2	0 - 5 years	Mutant	Mutant	Wild type	2008-09-17	2008	3	1	1	3-2008	Fever	11.5029	3. Lake Endemic	MDR86	1. 0 - 5 years
KDH1102567	Kisumu DH	2/14/2011	Kisumu	Female	Kisumu	No		Yes		5	1	No			Fever	3	16	36.7	110	Malaria		67500					Lake Endemic	4	0 - 5 years	wild type/Mutant	Wild type	Mutant	2011-02-14	2011	1	1	0	1-2011	Fever	11.1199	3. Lake Endemic	MDR184	1. 0 - 5 years
KDH0904208	Kisumu DH	4/28/2009	Kisumu	Male	Kisumu	No		No				No			Fever	4	7.6	40	157	Malaria		90000					Lake Endemic	9	6 - 15 years	Mutant	Mutant	Wild type	2009-04-28	2009	2	1	1	2-2009	Fever	11.4076	3. Lake Endemic	MDR86	2. 6 - 15 years
KDH0804021	Kisumu DH	4/2/2008	Kisumu	Male	Kisumu	Yes	1-2 months	Yes		2	1	No			Fever	5	20	38	151	Malaria		3360					Lake Endemic	5	0 - 5 years	Mutant	Mutant	Wild type	2008-04-02	2008	2	1	1	2-2008	Fever	8.1197	3. Lake Endemic	MDR86	1. 0 - 5 years
KOM1407295	Kombewa DH	7/23/2014	Kisumu	Female	Kisumu	No		No				No			Fever	4	11	38.4	107	Malaria		32280					Lake Endemic	2	0 - 5 years	Wild type	Wild type	Wild type	2014-07-23	2014	3	0	0	3-2014	Fever	10.3822	3. Lake Endemic		1. 0 - 5 years
KDH0809136	Kisumu DH	9/29/2008	Kisumu	Male	Kisumu	Yes	<2weeks	Yes		2	3	No			Vomiting	1	13	37.5	125	Malaria		49500					Lake Endemic	2	0 - 5 years	undetermined	Mutant	Wild type	2008-09-29	2008	3	1	2	3-2008	Others	10.8097	3. Lake Endemic	MDR86	1. 0 - 5 years
KOM1407297	Kombewa DH	7/25/2014	Kisumu	Female	Kisumu	Yes	<2weeks	No				No			Fever	2	55	38.1	80	Malaria							Lake Endemic	26	Above 15 years	Wild type	Wild type	Wild type	2014-07-25	2014	3	0	0	3-2014	Fever		3. Lake Endemic		3. Above 15 years
KDH14051417	Kisumu DH	5/28/2014	Kisumu	Female	Kisumu	Yes	1-2 months	Yes		5	1	No			Dizziness	4	31	38.5	145	Malaria		22500					Lake Endemic	12	6 - 15 years	undetermined	Wild type	wild type/Mutant	2014-05-28	2014	2	0	2	2-2014	Others	10.0213	3. Lake Endemic		2. 6 - 15 years
KDH1002355	Kisumu DH	2/10/2010	KisumuU	Male	Kisumu	No		Yes		1	2	Yes	Other	Hospital/Dispensary	Fever	4	21	36.4	90	Malaria		9000					Lake Endemic	6	6 - 15 years	undetermined	Wild type	Mutant	2010-02-10	2010	1	1	2	1-2010	Fever	9.10498	3. Lake Endemic	MDR184	2. 6 - 15 years
KDH1106654	Kisumu DH	6/17/2011	Kisumu	Female	Kisumu	Yes	<2weeks	Yes	13			No			Headache	1	55	37.1	96	Malaria		45000					Lake Endemic	2	0 - 5 years	Mutant	Mutant	undetermined	2011-06-17	2011	2	1	1	2-2013	Headache	10.7144	3. Lake Endemic	MDR86	1. 0 - 5 years
KDH0911308	Kisumu DH	11/24/2009	Kisumu	Female	Kisumu	No		Yes	7			No			Headache	3	59	37.8	109	Malaria		31500					Lake Endemic	18	Above 15 years	Mutant	Wild type	undetermined	2009-11-24	2009	4	1	1	4-2009	Headache	10.3577	3. Lake Endemic	CRT76	3. Above 15 years
KDH1101542	Kisumu DH	1/5/2011	Kisumu	Female	Kisumu	No		Yes		4	4	No			Vomiting	7	20	36.3	128	Malaria		65250					Lake Endemic	7	6 - 15 years	Wild type	Wild type	wild type/Mutant	2011-01-05	2011	1	0	0	1-2011	Others	11.086	3. Lake Endemic		2. 6 - 15 years
KDH0901168	Kisumu DH	1/20/2009	Kisumu	Female	Kisumu	No		Yes		4	2	No			Fever	3	11.5	37.1	126	Malaria		81000					Lake Endemic	2	0 - 5 years	Mutant	Wild type	wild type/Mutant	2009-01-20	2009	1	1	1	1-2009	Fever	11.3022	3. Lake Endemic	CRT76	1. 0 - 5 years
KDH1002357	Kisumu DH	2/10/2010	Kisumu	Female	Kisumu	No		Yes		6	1	No			Fever	3				Malaria		47250					Lake Endemic	6	6 - 15 years	undetermined	Mutant	undetermined	2010-02-10	2010	1	1	2	1-2010	Fever	10.7632	3. Lake Endemic	MDR86	2. 6 - 15 years
KDH1108678	Kisumu DH	8/5/2011	Kisumu	Female	Kisumu	Yes		No				No			Fever	2	10	37.8	160	Malaria		33750					Lake Endemic	1	0 - 5 years	Wild type	Wild type	undetermined	2011-08-05	2011	3	0	0	3-2011	Fever	10.4267	3. Lake Endemic		1. 0 - 5 years
KDH14051399	Kisumu DH	5/13/2014	Kisumu	Male	Kisumu	No		Yes		7	2	No			Fever	4	9.8	38.9	124	Malaria		6750					Lake Endemic	2	0 - 5 years	Wild type	Wild type	Wild type	2014-05-13	2014	2	0	0	2-2014	Fever	8.8173	3. Lake Endemic		1. 0 - 5 years
KDH1104611	Kisumu DH	4/21/2011	Kisumu	Male	Kisumu	Yes	2-4 weeks	No				No			Seizure	1	11.8	36.4	124	Malaria		110250					Lake Endemic	2	0 - 5 years	wild type/Mutant	wild type/Mutant	wild type/Mutant	2011-04-21	2011	2	0	0	2-2013	Others	11.6105	3. Lake Endemic		1. 0 - 5 years
KDH14011274	Kisumu DH	1/9/2014	Kisumu	Female	Kisumu	Yes	<2weeks	Yes	2		0	No			Headache	1	48	36.2	100	Malaria		522000					Lake Endemic	14	6 - 15 years	Wild type	Wild type	Mutant	2014-01-09	2014	1	1	0	1-2014	Headache	13.1654	3. Lake Endemic	MDR184	2. 6 - 15 years
KDH0907245	Kisumu DH	7/21/2009	Kisumu	Female	Kisumu	No		Yes		2	2	No			Fever	7	75	38.6	140	Malaria		22500					Lake Endemic	2	0 - 5 years	undetermined	wild type/Mutant	Wild type	2009-07-21	2009	3	0	2	3-2009	Fever	10.0213	3. Lake Endemic		1. 0 - 5 years
KOM1406272	Kombewa DH	6/19/2014	Kisumu	Male	Kisumu	No		Yes		1	3	Yes	Other	Hospital/Dispensary	Fever	2	22	37.3	130	Malaria		39680					Lake Endemic	6	6 - 15 years	Wild type	Wild type	Mutant	2014-06-19	2014	2	1	0	2-2014	Fever	10.5886	3. Lake Endemic	MDR184	2. 6 - 15 years
KDH1007460	Kisumu DH	7/13/2010	Kisumu	Female	Kisumu	No		Yes	1	6		No			Headache	1	30	39.5	188	Malaria		45000					Lake Endemic	9	6 - 15 years	Mutant	Wild type	Wild type	2010-07-13	2010	3	1	1	3-2010	Headache	10.7144	3. Lake Endemic	CRT76	2. 6 - 15 years
KOM1402161	Kombewa DH	2/19/2014	Kisumu	Male	Kisumu	No		Yes		4	4	No			Headache	2	40	37.6	141	Malaria		109120					Lake Endemic	11	6 - 15 years	Wild type	Wild type	wild type/Mutant	2014-02-19	2014	1	0	0	1-2014	Headache	11.6002	3. Lake Endemic		2. 6 - 15 years
KDH1110722	Kisumu DH	10/10/2011	Kisumu	Female	Kisumu	No		No				No			Fever	2	14	36.1	110	Malaria		204750					Lake Endemic	4	0 - 5 years	Wild type	wild type/Mutant	Wild type	2011-10-10	2011	4	0	0	4-2011	Fever	12.2295	3. Lake Endemic		1. 0 - 5 years
KOM1402146	Kombewa DH	2/4/2014	Kisumu	Male	Kisumu	No		Yes		2	3	No			Fever	4	20	37.6	104	Malaria		104800					Lake Endemic	8	6 - 15 years	Wild type	Wild type	Wild type	2014-02-04	2014	1	0	0	1-2014	Fever	11.5598	3. Lake Endemic		2. 6 - 15 years
KDH0902178	Kisumu DH	2/9/2009	Kisumu	Male	Kisumu	Yes	1-2 months	Yes		8	1	No			Fever	1	61	36.7	79	Malaria		22500	200				Lake Endemic	54	Above 15 years	Mutant	Mutant	undetermined	2009-02-09	2009	1	1	1	1-2009	Fever	10.0213	3. Lake Endemic	MDR86	3. Above 15 years
KDH1101547	Kisumu DH	1/13/2011	Kisumu	Male	Kisumu	No		No				No			Fever	1	17	38.1	148	Malaria		42750					Lake Endemic	5	0 - 5 years	undetermined	Wild type	Mutant	2011-01-13	2011	1	1	2	1-2011	Fever	10.6631	3. Lake Endemic	MDR184	1. 0 - 5 years
KDH14041378	Kisumu DH	4/22/2014	Kisumu	Female	Kisumu	No		No				No			Fever	10	11	37.1	141	Malaria		396000					Lake Endemic	1	0 - 5 years	Wild type	Wild type	Wild type	2014-04-22	2014	2	0	0	2-2014	Fever	12.8892	3. Lake Endemic		1. 0 - 5 years
KDH1103593	Kisumu DH	3/29/2010	Kisumu	Male	Kisumu	No		Yes		2	3	No			Headache	2	24	36.4	120	Malaria		405000					Lake Endemic	8	6 - 15 years	undetermined	wild type/Mutant	Mutant	2010-03-29	2010	1	1	2	1-2010	Headache	12.9116	3. Lake Endemic	MDR184	2. 6 - 15 years
KDH1009486	Kisumu DH	9/14/2010	Kisumu	Female	Kisumu	Yes	<2weeks	Yes		1	1	Yes	Quinine	Hospital/Dispensary	Vomiting	2	21	37.9	128	Malaria		15750					Lake Endemic	8	6 - 15 years	undetermined	undetermined	Wild type	2010-09-14	2010	3	0	2	3-2010	Others	9.6646	3. Lake Endemic		2. 6 - 15 years
KDH0809125	Kisumu DH	9/12/2008	Kisumu	Female	Kisumu	Yes	2-4 weeks	Yes			4	Yes	Other	Pharmacist	Fever	2	92	36.5	138	Malaria		218250					Lake Endemic	1	0 - 5 years	Mutant	Mutant	Wild type	2008-09-12	2008	3	1	1	3-2008	Fever	12.2934	3. Lake Endemic	MDR86	1. 0 - 5 years
KOM1309061	Kombewa DH	9/18/2013	Kisumu east	Female	Kisumu	No	<2weeks	Yes		6	3	No			Fever	4	73.6	37.4	89	RTI	RTI						Lake Endemic	53	Above 15 years	Wild type	wild type/Mutant	wild type/Mutant	2013-09-18	2013	3	0	0	3-2013	Fever		3. Lake Endemic		3. Above 15 years
KDH0904210	Kisumu DH	4/29/2009	Kisumu	Male	Kisumu	No		No				No			Fever	2	15.5	37.3	146	Malaria		382500					Lake Endemic	3	0 - 5 years	Mutant	Wild type	Wild type	2009-04-29	2009	2	1	1	2-2009	Fever	12.8545	3. Lake Endemic	CRT76	1. 0 - 5 years
KDH1101540	Kisumu DH	1/3/2011	Kisumu	Female	Kisumu	No		Yes		4	4	No			Fever	9	18	38.1	126	Malaria		112500					Lake Endemic	4	0 - 5 years	Wild type	Wild type	Wild type	2011-01-03	2011	1	0	0	1-2011	Fever	11.6307	3. Lake Endemic		1. 0 - 5 years
KOM1406258	Kombewa DH	6/10/2014	Kisumu	Male	Kisumu	No		Yes		4	2	No			Fever	5	13	37.3	147	Malaria		155520					Lake Endemic	3	0 - 5 years	Mutant	Wild type	Wild type	2014-06-10	2014	2	1	1	2-2014	Fever	11.9545	3. Lake Endemic	CRT76	1. 0 - 5 years
KDH1104603	Kisumu DH	4/18/2011	Kisumu	Female	Kisumu	No		Yes		2	1	No			Fever	1	13.9	35.6	140	Malaria		92250					Lake Endemic	2	0 - 5 years	wild type/Mutant	wild type/Mutant	Wild type	2011-04-18	2011	2	0	0	2-2013	Fever	11.4323	3. Lake Endemic		1. 0 - 5 years
KDH1201767	Kisumu DH	1/6/2012	Kisumu	Female	Kisumu	Yes	1-2 months	Yes		2	2	No			Fever	4	11	36.9	140	Malaria		33750					Lake Endemic	2	0 - 5 years	Wild type	Wild type	undetermined	2012-01-06	2012	1	0	0	1-2012	Fever	10.4267	3. Lake Endemic		1. 0 - 5 years
KDH1202801	Kisumu DH	2/6/2012	Kisumu	Male	Kisumu	No		Yes	2		0	No			Fever	1	15	37.8	140	Malaria		216000					Lake Endemic	3	0 - 5 years	wild type/Mutant	Wild type	Mutant	2012-02-06	2012	1	1	0	1-2012	Fever	12.283	3. Lake Endemic	MDR184	1. 0 - 5 years
KDH1105633	Kisumu DH	5/16/2011	Kisumu	Female	Kisumu	Yes	1-2 months	Yes		5	1	No			Fever	2	12	37.9	152	Malaria		465750					Lake Endemic	3	0 - 5 years	Wild type	Mutant	undetermined	2011-05-16	2011	2	1	0	2-2013	Fever	13.0514	3. Lake Endemic	MDR86	1. 0 - 5 years
KDH0906234	Kisumu DH	6/17/2009	Kisumu	Male	Kisumu	Yes	1-2 months	No				No			Fever	2	8.7	39.3	150	Malaria		141750					Lake Endemic	0	0 - 5 years	wild type/Mutant	wild type/Mutant	Wild type	2009-06-17	2009	2	0	0	2-2009	Fever	11.8618	3. Lake Endemic		1. 0 - 5 years
KOM1402151	Kombewa DH	2/10/2014	Kisumu	Female	Kisumu	No		Yes		4	2	No			Fever	2	10.5	38.1	141	Malaria		160960					Lake Endemic	2	0 - 5 years	Wild type	Wild type	Wild type	2014-02-10	2014	1	0	0	1-2014	Fever	11.9889	3. Lake Endemic		1. 0 - 5 years
KDH0806068	Kisumu DH	6/11/2008	Kisumu	Male	Kisumu	No		Yes		6	1	No			Vomiting	1	38	38	60	Malaria		33750					Lake Endemic	11	6 - 15 years	Mutant	Mutant	Wild type	2008-06-11	2008	2	1	1	2-2008	Others	10.4267	3. Lake Endemic	MDR86	2. 6 - 15 years
KDH1105624	Kisumu DH	5/9/2011	Kisumu	Female	Kisumu	Yes	2-4 weeks	Yes	1	1		No			Fever	3	70	38.1	96	Malaria							Lake Endemic	26	Above 15 years	wild type/Mutant	Wild type	undetermined	2011-05-09	2011	2	0	0	2-2013	Fever		3. Lake Endemic		3. Above 15 years
KDH14011284	Kisumu DH	1/14/2014	Kisumu	Female	Kisumu	Yes	2-4 weeks	Yes		3	2	No			Fever	1	10.7	37.6	148	Malaria		63000					Lake Endemic	2	0 - 5 years	Wild type	Wild type	Wild type	2014-01-14	2014	1	0	0	1-2014	Fever	11.0509	3. Lake Endemic		1. 0 - 5 years
KDH1206849	Kisumu DH	6/11/2012	Kisumu	Male	Kisumu	No		Yes		10	1	No			Diarrhea	3	11	35.4	136	Malaria		15750					Lake Endemic	1	0 - 5 years	wild type/Mutant	Wild type	wild type/Mutant	2012-06-11	2012	2	0	0	2-2012	Others	9.6646	3. Lake Endemic		1. 0 - 5 years
KDH14051391	Kisumu DH	5/8/2014	Kisumu	Male	Kisumu	Yes	<2weeks	Yes		7	3	No			Fever	1	11.7	38.5	135	Malaria		216000					Lake Endemic	2	0 - 5 years	Wild type	Wild type	Mutant	2014-05-08	2014	2	1	0	2-2014	Fever	12.283	3. Lake Endemic	MDR184	1. 0 - 5 years
KDH0811148	Kisumu DH	11/10/2008	Kisumu	Male	Kisumu	Yes	<2weeks	Yes	1			No			Fever	3	13	40.2	150	Malaria		130500					Lake Endemic	3	0 - 5 years	Mutant	Wild type	wild type/Mutant	2008-11-10	2008	4	1	1	4-2008	Fever	11.7791	3. Lake Endemic	CRT76	1. 0 - 5 years
KDH0909255	Kisumu DH	9/22/2009	Kisumu	Male	Kisumu	Yes	<2weeks	Yes	2			No			Fever	2	30	36.9	86	Malaria		22500					Lake Endemic	12	6 - 15 years	Mutant	Wild type	Wild type	2009-09-22	2009	3	1	1	3-2009	Fever	10.0213	3. Lake Endemic	CRT76	2. 6 - 15 years
KDH0910287	Kisumu DH	10/26/2009	Kisumu	Female	Kisumu	No		Yes	3			No			Headache	2	20	37.5	80	Malaria		123750					Lake Endemic	6	6 - 15 years	Mutant	Mutant	undetermined	2009-10-26	2009	4	1	1	4-2009	Headache	11.726	3. Lake Endemic	MDR86	2. 6 - 15 years
KDH1011521	Kisumu DH	11/23/2010	Kisumu	Male	Kisumu	No		Yes		3	3	No			Fever	1	8	39.1	172	Malaria		83250					Lake Endemic	0	0 - 5 years	Wild type	Wild type	Wild type	2010-11-23	2010	4	0	0	4-2010	Fever	11.3296	3. Lake Endemic		1. 0 - 5 years
KDH1008468	Kisumu DH	8/9/2010	Kisumu	Female	Kisumu	No		Yes		1	2	Yes	Quinine	Hospital/Dispensary	Fever	2	11.5	37.2	156	Malaria		105750					Lake Endemic	1	0 - 5 years	wild type/Mutant	Mutant	Mutant	2010-08-09	2010	3	1	0	3-2010	Fever	11.5688	3. Lake Endemic	MDR184	1. 0 - 5 years
KDH0803006	Kisumu DH	3/18/2008	Nyando	Male	Kisumu	Yes	1-2 months	Yes		8		No			Fever	5	11	37	118	Malaria		47250					Lake Endemic	3	0 - 5 years	Mutant	Mutant	Wild type	2008-03-18	2008	1	1	1	1-2008	Fever	10.7632	3. Lake Endemic	MDR86	1. 0 - 5 years
KDH0904206	Kisumu DH	4/24/2009	Kisumu	Female	Kisumu	No		No				No			Fever	2	16.2	39.2	153	Malaria		56250					Lake Endemic	4	0 - 5 years	Mutant	Wild type	Wild type	2009-04-24	2009	2	1	1	2-2009	Fever	10.9376	3. Lake Endemic	CRT76	1. 0 - 5 years
KOM1309053	Kombewa DH	9/11/2013	Siaya	Female	Siaya	Yes	<2weeks	Yes	1		0	No			Backache	2	63	36.4	73	RTI	RTI						Lake Endemic	48	Above 15 years	Wild type	Wild type	Mutant	2013-09-11	2013	3	1	0	3-2013	Others		3. Lake Endemic	MDR184	3. Above 15 years
KDH0910272	Kisumu DH	9/15/2009	Kisumu	Female	Kisumu	No		No				No			Fever	3	9	39.1	104	Malaria		18000					Lake Endemic	1	0 - 5 years	Mutant	Wild type	Wild type	2009-09-15	2009	3	1	1	3-2009	Fever	9.79813	3. Lake Endemic	CRT76	1. 0 - 5 years
KOM1406279	Kombewa DH	6/26/2014	Kisumu	Female	Kisumu	No		Yes		7	2	No			Headache	7	54	37.6	81	Malaria		9920					Lake Endemic	19	Above 15 years	Wild type	Wild type	Wild type	2014-06-26	2014	2	0	0	2-2014	Headache	9.20231	3. Lake Endemic		3. Above 15 years
KDH1201794	Kisumu DH	1/30/2012	Kisumu	Male	Kisumu	No		Yes		5		No			Fever	3	15	38	100	Malaria	RTI	220500					Lake Endemic	4	0 - 5 years	Mutant	Wild type	Mutant	2012-01-30	2012	1	1	1	1-2012	Fever	12.3037	3. Lake Endemic	MDR184	1. 0 - 5 years
KDH0905218	Kisumu DH	5/21/2009	Kisumu	Female	Kisumu	Yes	<2weeks	Yes			1	No			Fever	1	55	39.3	100	Malaria		45000					Lake Endemic	20	Above 15 years	Mutant	Mutant	Wild type	2009-05-21	2009	2	1	1	2-2009	Fever	10.7144	3. Lake Endemic	MDR86	3. Above 15 years
KDH1108682	Kisumu DH	8/9/2011	Kisumu	Female	Kisumu	No		Yes		4	2	No			Fever	1	10	39.6	172	Malaria		18000					Lake Endemic	1	0 - 5 years	wild type/Mutant	wild type/Mutant	undetermined	2011-08-09	2011	3	0	0	3-2011	Fever	9.79813	3. Lake Endemic		1. 0 - 5 years
KDH0907246	Kisumu DH	7/29/2009	Kisumu	Female	Kisumu	Yes	<2weeks	Yes		1	3	Yes	Quinine	Hospital/Dispensary	Fever	5	8	38.4	146	Malaria		362250					Lake Endemic	1	0 - 5 years	wild type/Mutant	undetermined	undetermined	2009-07-29	2009	3	0	0	3-2009	Fever	12.8001	3. Lake Endemic		1. 0 - 5 years
KDH0812156	Kisumu DH	12/1/2008	Kisumu	Female	Kisumu	No		Yes		4	4	No			Fever	7	25	39.9	134	Malaria		47250					Lake Endemic	9	6 - 15 years	Mutant	Wild type	Wild type	2008-12-01	2008	4	1	1	4-2008	Fever	10.7632	3. Lake Endemic	CRT76	2. 6 - 15 years
KOM1309067	Kombewa DH	9/24/2013	Kisumu	Male	Kisumu	No		Yes		7	2	No			Fever	6	32	38.1	107								Lake Endemic	13	6 - 15 years	Wild type	Wild type	Mutant	2013-09-24	2013	3	1	0	3-2013	Fever		3. Lake Endemic	MDR184	2. 6 - 15 years
KDH0905215	Kisumu DH	5/20/2009	Kisumu	Male	Kisumu	No		Yes		2	4	No			Headache	3	82	36.2	75	Malaria		1520					Lake Endemic			Mutant	wild type/Mutant	Wild type	2009-05-20	2009	2	1	1	2-2009	Headache	7.32647	3. Lake Endemic	CRT76
KDH1009480	Kisumu DH	9/1/2010	Kisumu	Male	Kisumu	No		No				No			Fever	1	9.5	38.2	147	Malaria		63000					Lake Endemic	1	0 - 5 years	undetermined	Wild type	Wild type	2010-09-01	2010	3	0	2	3-2010	Fever	11.0509	3. Lake Endemic		1. 0 - 5 years
KOM1405229	Kombewa DH	5/6/2014	Kisumu	Male	Kisumu	No		Yes		2	4	No			Vomiting	2	11	38.1	120	Malaria		186880					Lake Endemic	2	0 - 5 years	Wild type	Wild type	Mutant	2014-05-06	2014	2	1	0	2-2014	Others	12.1382	3. Lake Endemic	MDR184	1. 0 - 5 years
KOM1310078	Kombewa DH	10/9/2013	Kisumu	Male	Kisumu	No		Yes		4	3	No			Headache	2	27	38.1	101	Malaria		59840					Lake Endemic	9	6 - 15 years	Wild type	Wild type	wild type/Mutant	2013-10-09	2013	4	0	0	4-2013	Headache	10.9994	3. Lake Endemic		2. 6 - 15 years
KDH1004396	Kisumu DH	4/15/2010	Kisumu	Female	Kisumu	No		Yes		6	3	No			Vomiting	2	8.9	38.3	163	Malaria		117000					Lake Endemic	1	0 - 5 years	Mutant	Mutant	Wild type	2010-04-15	2010	2	1	1	2-2010	Others	11.6699	3. Lake Endemic	MDR86	1. 0 - 5 years
KOM1402159	Kombewa DH	2/19/2014	Kisumu	Female	Kisumu	Yes	2-4 weeks	Yes		7	2	No			Coughing	3	9	37.1	91	Malaria		18400					Lake Endemic	2	0 - 5 years	Wild type	Wild type	Wild type	2014-02-19	2014	1	0	0	1-2014	Coughing	9.82011	3. Lake Endemic		1. 0 - 5 years
KDH1202814	Kisumu DH	2/28/2012	Kisumu	Female	Kisumu	No		Yes	4			No			Headache	14	68.5	38.4	104	Malaria		51750					Lake Endemic	31	Above 15 years	Mutant	undetermined	Mutant	2012-02-28	2012	1	1	1	1-2012	Headache	10.8542	3. Lake Endemic	MDR184	3. Above 15 years
KDH1101552	Kisumu DH	1/17/2011	Kisumu	Female	Kisumu	No		Yes		2	5	No			Fever	3	21	37.1	124	Malaria		175500					Lake Endemic	7	6 - 15 years	undetermined	undetermined	Mutant	2011-01-17	2011	1	1	2	1-2011	Fever	12.0754	3. Lake Endemic	MDR184	2. 6 - 15 years
KDH1201787	Kisumu DH	1/23/2012	Kisumu	Male	Kisumu	Yes	2-4 weeks	Yes		3	2	No			Fever	2	12	39.8	148	Malaria	RTI	180000					Lake Endemic	2	0 - 5 years	wild type/Mutant	Wild type	wild type/Mutant	2012-01-23	2012	1	0	0	1-2012	Fever	12.1007	3. Lake Endemic		1. 0 - 5 years
KDH1003385	Kisumu DH	3/22/2010	Kisumu	Male	Kisumu	No		Yes	2			No			Fever	14	21	39.7	88	Malaria		49500					Lake Endemic	7	6 - 15 years	Mutant	Mutant	Wild type	2010-03-22	2010	1	1	1	1-2010	Fever	10.8097	3. Lake Endemic	MDR86	2. 6 - 15 years
KDH1101558	Kisumu DH	1/25/2011	Kisumu	Female	Kisumu	Yes	<2weeks	Yes		1	2	Yes	Other	Self	Fever	2	11.8	38	140	Malaria		18000					Lake Endemic	1	0 - 5 years	Wild type	Mutant	Wild type	2011-01-25	2011	1	1	0	1-2011	Fever	9.79813	3. Lake Endemic	MDR86	1. 0 - 5 years
KDH1107670	Kisumu DH	7/20/2011	Kisumu	Male	Kisumu	No		Yes		3	1	No			Fever	5	10.4	39.8	134	Malaria							Lake Endemic	1	0 - 5 years	wild type/Mutant	undetermined	undetermined	2011-07-20	2011	3	0	0	3-2011	Fever		3. Lake Endemic		1. 0 - 5 years
KDH1206855	Kisumu DH	6/15/2012	Kisumu	Male	Kisumu	Yes	2-4 weeks	Yes		3	4	No			Fever	1	12	39.4	140	Malaria		33750					Lake Endemic	2	0 - 5 years	wild type/Mutant	Wild type	Wild type	2012-06-15	2012	2	0	0	2-2012	Fever	10.4267	3. Lake Endemic		1. 0 - 5 years
KDH1009485	Kisumu DH	9/14/2010	Kisumu	Male	Kisumu	Yes	2-4 weeks	Yes		2	1	No			Vomiting	1	15.5	39.3	164	Malaria		87750					Lake Endemic	4	0 - 5 years	Mutant	Wild type	Mutant	2010-09-14	2010	3	1	1	3-2010	Others	11.3822	3. Lake Endemic	MDR184	1. 0 - 5 years
KDH1112760	Kisumu DH	12/7/2011	Kisumu	Male	Kisumu	No		Yes		6	4	No			Fever	3	12	37.1	144	Malaria							Lake Endemic	3	0 - 5 years	wild type/Mutant	Wild type	undetermined	2011-12-07	2011	4	0	0	4-2011	Fever		3. Lake Endemic		1. 0 - 5 years
KDH1107672	Kisumu DH	7/21/2011	Kisumu	Male	Kisumu	No		No				No			Fever	2	10	39.7	156	Malaria		33750					Lake Endemic	0	0 - 5 years	wild type/Mutant	wild type/Mutant	undetermined	2011-07-21	2011	3	0	0	3-2011	Fever	10.4267	3. Lake Endemic		1. 0 - 5 years
KDH1007461	Kisumu DH	7/13/2010	Kisumu	Female	Kisumu	No		Yes	1	3		No			Headache	9	21	38.5	136	Malaria		11250					Lake Endemic	6	6 - 15 years	wild type/Mutant	Wild type	wild type/Mutant	2010-07-13	2010	3	0	0	3-2010	Headache	9.32812	3. Lake Endemic		2. 6 - 15 years
KDH1108677	Kisumu DH	8/5/2011	Kisumu	Female	Kisumu	No		Yes		2	2	No			Vomiting	1	11	36	104	Malaria		9000					Lake Endemic	3	0 - 5 years	wild type/Mutant	Wild type	undetermined	2011-08-05	2011	3	0	0	3-2011	Others	9.10498	3. Lake Endemic		1. 0 - 5 years
KOM1404203	Kombewa DH	4/10/2014	Kisumu	Female	Kisumu	No		Yes		11	3	No			Fever	5	17.5	39.1	100	Malaria							Lake Endemic	6	6 - 15 years	undetermined	Wild type	Wild type	2014-04-10	2014	2	0	2	2-2014	Fever		3. Lake Endemic		2. 6 - 15 years
KDH1201796	Kisumu DH	1/31/2012	Kisumu	Male	Kisumu	No		Yes		1	1	Yes	Other	Hospital/Dispensary	Diarrhea	7	11	36.7	124	Malaria	RTI	380250					Lake Endemic	1	0 - 5 years	undetermined	Wild type	wild type/Mutant	2012-01-31	2012	1	0	2	1-2012	Others	12.8486	3. Lake Endemic		1. 0 - 5 years
KDH0810137	Kisumu DH	10/13/2008	Kisumu	Female	Kisumu	No		Yes	2			No			Dizziness	2	57	38.7	69	Malaria		72000					Lake Endemic	24	Above 15 years	Mutant	Wild type	Mutant	2008-10-13	2008	4	1	1	4-2008	Others	11.1844	3. Lake Endemic	MDR184	3. Above 15 years
KDH1009488	Kisumu DH	9/15/2010	Kisumu	Female	Kisumu	No		No				No			Fever	1	12.5	40	180	Malaria		112500					Lake Endemic	4	0 - 5 years	undetermined	Wild type	Mutant	2010-09-15	2010	3	1	2	3-2010	Fever	11.6307	3. Lake Endemic	MDR184	1. 0 - 5 years
KDH1005420	Kisumu DH	5/12/2010	Kisumu	Female	Kisumu	Yes	2-4 weeks	Yes		4	1	No			Fever	2	13	37.9	160	Malaria		573750					Lake Endemic	4	0 - 5 years	Wild type	Wild type	Mutant	2010-05-12	2010	2	1	0	2-2010	Fever	13.2599	3. Lake Endemic	MDR184	1. 0 - 5 years
KDH0910265	Kisumu DH	10/7/2009	Kisumu	Male	Kisumu	No		Yes	5			No			Fever	2	58	38.5	84	Malaria		120					Lake Endemic	23	Above 15 years	wild type/Mutant	Wild type	Wild type	2009-10-07	2009	4	0	0	4-2009	Fever	4.78749	3. Lake Endemic		3. Above 15 years
KDH1201764	Kisumu DH	1/5/2012	Kisumu	Male	Kisumu	Yes	1-2 months	Yes		2	2	No			Fever	2	8.3	37.3	148	Malaria		45000					Lake Endemic	0	0 - 5 years	Mutant	Wild type	wild type/Mutant	2012-01-05	2012	1	1	1	1-2012	Fever	10.7144	3. Lake Endemic	CRT76	1. 0 - 5 years
KDH1204829	Kisumu DH	4/24/2012	Kisumu	Female	Kisumu	No		Yes		8	1	No			Fever	1	13	39.4	152	Malaria		18000					Lake Endemic	2	0 - 5 years	Wild type	Wild type	Wild type	2012-04-24	2012	2	0	0	2-2012	Fever	9.79813	3. Lake Endemic		1. 0 - 5 years
KDH0803001	Kisumu DH	3/13/2008	Kisumu	Male	Kisumu	Yes	<2weeks	Yes		4	4	No			Fever	1	23	37.7		Malaria		3040					Lake Endemic	7	6 - 15 years	Mutant	Mutant	Wild type	2008-03-13	2008	1	1	1	1-2008	Fever	8.01961	3. Lake Endemic	MDR86	2. 6 - 15 years
KDH14071452	Kisumu DH	7/22/2014	Kisumu	Male	Kisumu	Yes	1-2 months	No				No			Vomiting	4	16.9	38.4	148	Malaria		20250					Lake Endemic	5	0 - 5 years	Wild type	Wild type	wild type/Mutant	2014-07-22	2014	3	0	0	3-2014	Others	9.91591	3. Lake Endemic		1. 0 - 5 years
KDH1207871	Kisumu DH	7/19/2012	Kisumu	Male	Kisumu	No		Yes	3		0	No			Fever	1	18	39.9	172	Malaria		33750					Lake Endemic	4	0 - 5 years	Mutant	Wild type	Wild type	2012-07-19	2012	3	1	1	2-2013	Fever	10.4267	3. Lake Endemic	CRT76	1. 0 - 5 years
KDH0911291	Kisumu DH	11/9/2009	Kisumu	Male	Kisumu	Yes	<2weeks	No				No			Vomiting	4	62	37.8	91	Malaria		11250					Lake Endemic	54	Above 15 years	wild type/Mutant	Wild type	undetermined	2009-11-09	2009	4	0	0	4-2009	Others	9.32812	3. Lake Endemic		3. Above 15 years
KDH1111746	Kisumu DH	11/3/2011	Kisumu	Female	Kisumu	No		Yes	1		1	No			Fever	3	50	37.6	98	Malaria		22500					Lake Endemic	50	Above 15 years	wild type/Mutant	Wild type	wild type/Mutant	2011-11-03	2011	4	0	0	4-2011	Fever	10.0213	3. Lake Endemic		3. Above 15 years
KDH1109714	Kisumu DH	9/28/2011	Kisumu	Female	Kisumu	No		Yes		3	2	No			Fever	6	19	36.3	98	Malaria		1200					Lake Endemic	6	6 - 15 years	wild type/Mutant	wild type/Mutant	Mutant	2011-09-28	2011	3	1	0	3-2011	Fever	7.09008	3. Lake Endemic	MDR184	2. 6 - 15 years
KOM1307009	Kombewa DH	7/4/2013	Kisumu	Male	Kisumu	No		Yes		1	5	Yes	Other	Hospital/Dispensary	Fever	4	11	38.1	151	Malaria		18280					Lake Endemic	3	0 - 5 years	Wild type	Wild type	Mutant	2013-07-04	2013	3	1	0	3-2013	Fever	9.81356	3. Lake Endemic	MDR184	1. 0 - 5 years
KDH1003371	Kisumu DH	3/16/2010	Kisumu	Female	Kisumu	No		Yes		5	1	No			Fever	4	16	37.9	161	Malaria		15750					Lake Endemic	3	0 - 5 years	undetermined	Wild type	Wild type	2010-03-16	2010	1	0	2	1-2010	Fever	9.6646	3. Lake Endemic		1. 0 - 5 years
KDH1010502	Kisumu DH	10/19/2010	Kisumu	Female	Kisumu	No		Yes		3	5	No			Fever	1	14	39	120	Malaria		618750					Lake Endemic	3	0 - 5 years	Mutant	Mutant	Wild type	2010-10-19	2010	4	1	1	4-2010	Fever	13.3355	3. Lake Endemic	MDR86	1. 0 - 5 years
KDH0911309	Kisumu DH	11/25/2009	Kisumu	Male	Kisumu	No		Yes		2	1	No			Headache	4	22	37	150	Malaria		78750					Lake Endemic	6	6 - 15 years	wild type/Mutant	Wild type	Wild type	2009-11-25	2009	4	0	0	4-2009	Headache	11.274	3. Lake Endemic		2. 6 - 15 years
KDH0909254	Kisumu DH	9/17/2009	Kisumu	Female	Kisumu	No		Yes		7	3	No			Fever	4	40	37.7	80	Malaria		22500					Lake Endemic	23	Above 15 years	Mutant	undetermined	undetermined	2009-09-17	2009	3	1	1	3-2009	Fever	10.0213	3. Lake Endemic	CRT76	3. Above 15 years
KDH0807085	Kisumu DH	7/7/2008	Kisumu	Female	Kisumu	No		Yes	6		0	No			Headache	3	69	37.3	65	Malaria		317250					Lake Endemic	16	Above 15 years	Mutant	Wild type	Mutant	2008-07-07	2008	3	1	1	3-2008	Headache	12.6674	3. Lake Endemic	MDR184	3. Above 15 years
KDH14041368	Kisumu DH	4/8/2014	Kisumu	Female	Kisumu	Yes	1-2 months	No				No			Fever	4	24	37.9	120	Malaria							Lake Endemic	6	6 - 15 years	undetermined	wild type/Mutant	wild type/Mutant	2014-04-08	2014	2	0	2	2-2014	Fever		3. Lake Endemic		2. 6 - 15 years
KDH0902185	Kisumu DH	2/23/2009	Kisumu	Female	Kisumu	Yes	1-2 months	Yes		3	1	No			Fever	4	22	36.6	120	Malaria		45000					Lake Endemic	8	6 - 15 years	wild type/Mutant	Wild type	Mutant	2009-02-23	2009	1	1	0	1-2009	Fever	10.7144	3. Lake Endemic	MDR184	2. 6 - 15 years
KDH1005411	Kisumu DH	5/3/2010	Kisumu	Male	Kisumu	Yes	1-2 months	No				No			Fever	1	10	38.5	172	Malaria		22500					Lake Endemic	1	0 - 5 years	Wild type	Wild type	Wild type	2010-05-03	2010	2	0	0	2-2010	Fever	10.0213	3. Lake Endemic		1. 0 - 5 years
KDH1104595	Kisumu DH	4/7/2011	Kisumu	Female	Kisumu	Yes	<2weeks	Yes		2	4	No			Fever	3	11	37.7	164	Malaria		29250					Lake Endemic	2	0 - 5 years	wild type/Mutant	Wild type	Wild type	2011-04-07	2011	2	0	0	2-2013	Fever	10.2836	3. Lake Endemic		1. 0 - 5 years
KDH0809129	Kisumu DH	9/17/2008	Kisumu	Male	Kisumu	No		Yes		1	4	Yes	Other			1	12	36.6	150	Malaria		193500					Lake Endemic	1	0 - 5 years	Mutant	Wild type	Mutant	2008-09-17	2008	3	1	1	3-2008		12.173	3. Lake Endemic	MDR184	1. 0 - 5 years
KDH1201770	Kisumu DH	1/9/2012	Kisumu	Male	Kisumu	Yes	1-2 months	Yes		5	1	No			Seizure	1	10	39.3	176	Malaria	RTI	42750					Lake Endemic	0	0 - 5 years	Wild type	Wild type	Wild type	2012-01-09	2012	1	0	0	1-2012	Others	10.6631	3. Lake Endemic		1. 0 - 5 years
KDH0903195	Kisumu DH	3/24/2009	Kisumu	Female	Kisumu	No		Yes	2		0	No			Stomachache	5	66	36.2	66	Malaria		31500					Lake Endemic	53	Above 15 years	Mutant	Wild type	Mutant	2009-03-24	2009	1	1	1	1-2009	Others	10.3577	3. Lake Endemic	MDR184	3. Above 15 years
KOM1404219	Kombewa DH	4/29/2014	Kisumu	Male	Kisumu	No		Yes		5	4	No			Fever	4	12	38.1	93	Malaria		29040					Lake Endemic	2	0 - 5 years	Wild type	Wild type	Mutant	2014-04-29	2014	2	1	0	2-2014	Fever	10.2764	3. Lake Endemic	MDR184	1. 0 - 5 years
KOM1406256	Kombewa DH	6/10/2014	Kisumu	Male	Kisumu	No		Yes		1	6	Yes	Other	Hospital/Dispensary	Fever	3	13	36.8	117	Malaria		102080					Lake Endemic	1	0 - 5 years	Wild type	Wild type	Mutant	2014-06-10	2014	2	1	0	2-2014	Fever	11.5335	3. Lake Endemic	MDR184	1. 0 - 5 years
KDH14021341	Kisumu DH	2/27/2014	Kisumu	Male	Kisumu	No		Yes		10	2	No			Fever	1	29	36.5	106	Malaria		87750			2320		Lake Endemic	5	0 - 5 years	Wild type	Wild type	Mutant	2014-02-27	2014	1	1	0	1-2014	Fever	11.3822	3. Lake Endemic	MDR184	1. 0 - 5 years
KDH0912321	Kisumu DH	12/4/2009	Kisumu	Female	Kisumu	Yes	2-4 weeks	Yes	1			No			Headache	7	50	36.4	77	Malaria		9000					Lake Endemic	26	Above 15 years	wild type/Mutant	undetermined	undetermined	2009-12-04	2009	4	0	0	4-2009	Headache	9.10498	3. Lake Endemic		3. Above 15 years
KDH0909257	Kisumu DH	9/23/2009	Kisumu	Female	Kisumu	Yes	1-2 months	Yes			2	No			Headache	7	35	36.9	90	Malaria		24750					Lake Endemic	12	6 - 15 years	wild type/Mutant	Mutant	Mutant	2009-09-23	2009	3	1	0	3-2009	Headache	10.1166	3. Lake Endemic	MDR184	2. 6 - 15 years
KDH1107673	Kisumu DH	7/25/2011	Kisumu	Male	Kisumu	Yes	<2weeks	Yes		2	4	No			Fever	4	65	37.3	92	Malaria		9000					Lake Endemic	35	Above 15 years	wild type/Mutant	Wild type	undetermined	2011-07-25	2011	3	0	0	3-2011	Fever	9.10498	3. Lake Endemic		3. Above 15 years
KDH1108692	Kisumu DH	8/22/2011	Kisumu	Male	Kisumu	No		Yes		3	2	No			Fever	2	7.2	38.7	132	Malaria		40500					Lake Endemic	0	0 - 5 years	Wild type	Wild type	undetermined	2011-08-22	2011	3	0	0	3-2011	Fever	10.6091	3. Lake Endemic		1. 0 - 5 years
KDH0804028	Kisumu DH	4/11/2008	Kisumu	Female	Kisumu	Yes	1-2 months	Yes		3	3	No			Headache	3	63	36.4	90	Malaria		13500					Lake Endemic	23	Above 15 years	wild type/Mutant	wild type/Mutant	wild type/Mutant	2008-04-11	2008	2	0	0	2-2008	Headache	9.51044	3. Lake Endemic		3. Above 15 years
KDH0805053	Kisumu DH	5/26/2008	Kisumu	Female	Kisumu	Yes	<2weeks	Yes		5	2	No			Headache	1	25	37.7	85	Malaria		45000					Lake Endemic	9	6 - 15 years	wild type/Mutant	Mutant	wild type/Mutant	2008-05-26	2008	2	1	0	2-2008	Headache	10.7144	3. Lake Endemic	MDR86	2. 6 - 15 years
KDH1107671	Kisumu DH	7/21/2011	Kisumu	Female	Kisumu	No		Yes		4	1	No			Headache	1	23	39	140	Malaria		80					Lake Endemic	7	6 - 15 years	Mutant	Wild type	undetermined	2011-07-21	2011	3	1	1	3-2011	Headache	4.38203	3. Lake Endemic	CRT76	2. 6 - 15 years
KDH1204828	Kisumu DH	4/24/2012	Kisumu	Male	Kisumu	No		Yes	1		0	No			Fever	2	22	39.9	144	Malaria		15750					Lake Endemic	6	6 - 15 years	Wild type	Wild type	Mutant	2012-04-24	2012	2	1	0	2-2012	Fever	9.6646	3. Lake Endemic	MDR184	2. 6 - 15 years
KDH14051422	Kisumu DH	5/30/2014	Kisumu	Male	Kisumu	Yes	1-2 months	Yes	1	3	0	No			Fever	1	14.2	37	196	Malaria		72000					Lake Endemic	1	0 - 5 years	Wild type	Wild type	Wild type	2014-05-30	2014	2	0	0	2-2014	Fever	11.1844	3. Lake Endemic		1. 0 - 5 years
KDH1108688	Kisumu DH	8/15/2011	Kisumu	Female	Kisumu	Yes	2-4 weeks	No				No			Fever	1	15	37.1	122	Malaria		27000					Lake Endemic	1	0 - 5 years	Wild type	Wild type	Mutant	2011-08-15	2011	3	1	0	3-2011	Fever	10.2036	3. Lake Endemic	MDR184	1. 0 - 5 years
KDH0907247	Kisumu DH	7/21/2009	Kisumu	Male	Kisumu	No		No				No			Fever	3	10.2	39.9	120	Malaria		49500					Lake Endemic	1	0 - 5 years	wild type/Mutant	wild type/Mutant	Wild type	2009-07-21	2009	3	0	0	3-2009	Fever	10.8097	3. Lake Endemic		1. 0 - 5 years
KDH0805052	Kisumu DH	5/26/2008	Kisumu	Female	Kisumu	Yes	<2weeks	Yes		8	3	No			Fever	1	11	40	140	Malaria		5040					Lake Endemic	3	0 - 5 years	wild type/Mutant	wild type/Mutant	wild type/Mutant	2008-05-26	2008	2	0	0	2-2008	Fever	8.52516	3. Lake Endemic		1. 0 - 5 years
KDH0904200	Kisumu DH	4/7/2009	Kisumu	Female	Kisumu	Yes	<2weeks	Yes		6		No			Fever	2	16	38.4	141	Malaria		360000					Lake Endemic	3	0 - 5 years	Mutant	Wild type	Wild type	2009-04-07	2009	2	1	1	2-2009	Fever	12.7939	3. Lake Endemic	CRT76	1. 0 - 5 years
KOM1402147	Kombewa DH	2/5/2014	Kisumu	Female	Kisumu	No		Yes		3	4	No			Fever	2	20	36.4	74	Malaria		208640					Lake Endemic	4	0 - 5 years	Wild type	Wild type	wild type/Mutant	2014-02-05	2014	1	0	0	1-2014	Fever	12.2484	3. Lake Endemic		1. 0 - 5 years
KDH1104602	Kisumu DH	4/18/2011	Kisumu	Female	Kisumu	Yes	2-4 weeks	Yes	7			No			Headache	1	62	39.6	121	Malaria		15750					Lake Endemic	23	Above 15 years	wild type/Mutant	Wild type	wild type/Mutant	2011-04-18	2011	2	0	0	2-2013	Headache	9.6646	3. Lake Endemic		3. Above 15 years
KOM1402155	Kombewa DH	2/13/2014	Kisumu	Male	Kisumu	No		Yes		3	2	No			Fever	2	17	37.9	113	Malaria		6400					Lake Endemic	4	0 - 5 years	wild type/Mutant	Wild type	Mutant	2014-02-13	2014	1	1	0	1-2014	Fever	8.76405	3. Lake Endemic	MDR184	1. 0 - 5 years
KDH1102560	Kisumu DH	2/3/2011	Kisumu	Female	Kisumu	No		Yes		2	4	No			Fever	1	9.2	38.6	130	Malaria		27000					Lake Endemic	1	0 - 5 years	Wild type	Mutant	Wild type	2011-02-03	2011	1	1	0	1-2011	Fever	10.2036	3. Lake Endemic	MDR86	1. 0 - 5 years
KDH1011512	Kisumu DH	11/17/2010	Kisumu	Female	Kisumu	No		Yes	2			No			Headache	1	55	36.9	132	Malaria		348750					Lake Endemic	22	Above 15 years	undetermined	Wild type	wild type/Mutant	2010-11-17	2010	4	0	2	4-2010	Headache	12.7621	3. Lake Endemic		3. Above 15 years
KOM1405227	Kombewa DH	5/5/2014	Kisumu	Female	Kisumu	No		Yes		2	5	No			Seizure	3	21	38.3	121	Malaria		113600					Lake Endemic	3	0 - 5 years	Wild type	Wild type	wild type/Mutant	2014-05-05	2014	2	0	0	2-2014	Others	11.6404	3. Lake Endemic		1. 0 - 5 years
KOM1310080	Kombewa DH	10/11/2013	Kisumu	Male	Kisumu	No		Yes		6	2	No			Fever	3	9.6	37.1	99	Malaria		28040					Lake Endemic	1	0 - 5 years	Wild type	Wild type	Wild type	2013-10-11	2013	4	0	0	4-2013	Fever	10.2414	3. Lake Endemic		1. 0 - 5 years
KDH0910280	Kisumu DH	10/19/2009	Kisumu	Female	Kisumu	No		Yes			3	Yes	Other	Hospital/Dispensary	Fever	2	20	38.2	90	Malaria		85500					Lake Endemic	9	6 - 15 years	Mutant	Mutant	Wild type	2009-10-19	2009	4	1	1	4-2009	Fever	11.3563	3. Lake Endemic	MDR86	2. 6 - 15 years
KDH14021328	Kisumu DH	2/12/2014	Kisumu	Male	Kisumu	Yes	1-2 months	Yes	12		0	No			Joint Pains	5	33	37.6	112	Malaria		229500					Lake Endemic	13	6 - 15 years	Wild type	Wild type	Mutant	2014-02-12	2014	1	1	0	1-2014	Joint Pains	12.3437	3. Lake Endemic	MDR184	2. 6 - 15 years
KDH1104617	Kisumu DH	4/28/2011	Kisumu	Male	Kisumu	No		Yes		8	1	No			Fever	1	21.3	37.4	132	Malaria		92250					Lake Endemic	4	0 - 5 years	Wild type	Wild type	Mutant	2011-04-28	2011	2	1	0	2-2013	Fever	11.4323	3. Lake Endemic	MDR184	1. 0 - 5 years
KDH0809126	Kisumu DH	9/15/2008	Kisumu	Male	Kisumu	Yes	2-4 weeks	Yes		7	1	No			Fever	1	23	41		Malaria		81000					Lake Endemic	6	6 - 15 years	Mutant	Wild type	Wild type	2008-09-15	2008	3	1	1	3-2008	Fever	11.3022	3. Lake Endemic	CRT76	2. 6 - 15 years
KDH0804024	Kisumu DH	4/4/2008	Kisumu	Male	Kisumu	No		Yes		1	1	Yes			Fever	7	61	36.3	60	Malaria		22500					Lake Endemic	20	Above 15 years	wild type/Mutant	Mutant	Wild type	2008-04-04	2008	2	1	0	2-2008	Fever	10.0213	3. Lake Endemic	MDR86	3. Above 15 years
KDH0808105	Kisumu DH	8/26/2008	Kisumu	Female	Kisumu	Yes	2-4 weeks	No				No			Headache	1	21	35.9	99	Malaria	Tinea Capitis	36000					Lake Endemic	7	6 - 15 years	wild type/Mutant	wild type/Mutant	wild type/Mutant	2008-08-26	2008	3	0	0	3-2008	Headache	10.4913	3. Lake Endemic		2. 6 - 15 years
KOM1402157	Kombewa DH	2/13/2014	Kisumu	Male	Kisumu	No		Yes		2	4	No			Fever	3	17.1	37.3	106	Malaria		35840					Lake Endemic	4	0 - 5 years	Wild type	Wild type	wild type/Mutant	2014-02-13	2014	1	0	0	1-2014	Fever	10.4868	3. Lake Endemic		1. 0 - 5 years
KOM1406264	Kombewa DH	6/16/2014	Kisumu	Female	Kisumu	No		Yes		3	5	No			Fever	2	13	37.8	121	Malaria		266840					Lake Endemic	3	0 - 5 years	Wild type	Wild type	wild type/Mutant	2014-06-16	2014	2	0	0	2-2014	Fever	12.4944	3. Lake Endemic		1. 0 - 5 years
KDH0911300	Kisumu DH	11/18/2009	Kisumu	Male	Kisumu	No		Yes		1	4	Yes	Other	Self	Fever	1	10	39.7	160	Malaria		22500					Lake Endemic	1	0 - 5 years	wild type/Mutant	Wild type	Wild type	2009-11-18	2009	4	0	0	4-2009	Fever	10.0213	3. Lake Endemic		1. 0 - 5 years
KDH1202805	Kisumu DH	2/14/2012	Kisumu	Male	Kisumu	No		Yes		6	1	No			Fever	1	17	35.7	116	Malaria		470250					Lake Endemic	4	0 - 5 years	Mutant	Mutant	Wild type	2012-02-14	2012	1	1	1	1-2012	Fever	13.061	3. Lake Endemic	MDR86	1. 0 - 5 years
KDH0808088	Kisumu DH	8/1/2008	Kisumu	Female	Kisumu	No		Yes		3		No			Fever	2	12	39.3	134	Malaria		148500			120		Lake Endemic	3	0 - 5 years	Mutant	wild type/Mutant	Wild type	2008-08-01	2008	3	1	1	3-2008	Fever	11.9083	3. Lake Endemic	CRT76	1. 0 - 5 years
KDH1012528	Kisumu DH	12/3/2010	Kisumu	Female	Kisumu	No		Yes	2			No			Dizziness	7	55	36.4	68	Malaria		22500					Lake Endemic	17	Above 15 years	undetermined	Wild type	undetermined	2010-12-03	2010	4	0	2	4-2010	Others	10.0213	3. Lake Endemic		3. Above 15 years
KOM1406253	Kombewa DH	6/5/2014	Kisumu	Male	Kisumu	No		Yes		3	2	No			Fever	3	8.1	37.6	113	Malaria		36000					Lake Endemic	0	0 - 5 years	Mutant	Wild type	Wild type	2014-06-05	2014	2	1	1	2-2014	Fever	10.4913	3. Lake Endemic	CRT76	1. 0 - 5 years
KDH0807086	Kisumu DH	7/30/2008	Kisumu	Female	Kisumu	No		Yes	1		1	No			Headache	7	25	37.5	64	Malaria		7200					Lake Endemic	7	6 - 15 years	wild type/Mutant	wild type/Mutant	Wild type	2008-07-30	2008	3	0	0	3-2008	Headache	8.88184	3. Lake Endemic		2. 6 - 15 years
KDH0901172	Kisumu DH	1/28/2009	Kisumu	Male	Kisumu	Yes	2-4 weeks	Yes			4	Yes	Quinine	Pharmacist	Vomiting	3	16	38.2	154	Malaria		60750					Lake Endemic	5	0 - 5 years	undetermined	Wild type	undetermined	2009-01-28	2009	1	0	2	1-2009	Others	11.0145	3. Lake Endemic		1. 0 - 5 years
KOM1404212	Kombewa DH	4/17/2014	Kisumu	Female	Kisumu	No		Yes		2	1	No			Fever	1	15	39	126	Malaria		128800					Lake Endemic	2	0 - 5 years	Wild type	Wild type	Mutant	2014-04-17	2014	2	1	0	2-2014	Fever	11.766	3. Lake Endemic	MDR184	1. 0 - 5 years
KDH1202810	Kisumu DH	2/17/2012	Kisumu	Female	Kisumu	No		No				No			Fever	2	7.5	39.9	166	Malaria		380250					Lake Endemic	0	0 - 5 years	wild type/Mutant	Wild type	Mutant	2012-02-17	2012	1	1	0	1-2012	Fever	12.8486	3. Lake Endemic	MDR184	1. 0 - 5 years
KDH0805054	Kisumu DH	5/27/2008	Kisumu	Female	Kisumu	No		Yes	1		1	No			Headache	3	69	37.2	102	Malaria		29250					Lake Endemic	36	Above 15 years	Wild type	wild type/Mutant	wild type/Mutant	2008-05-27	2008	2	0	0	2-2008	Headache	10.2836	3. Lake Endemic		3. Above 15 years
KDH1209884	Kisumu DH	9/12/2012	Kisumu	Female	Kisumu	Yes	2-4 weeks	Yes		2	3	No			Fever	5	26	37.2	136	Malaria		51750					Lake Endemic	9	6 - 15 years	undetermined	Wild type	Mutant	2012-09-12	2012	3	1	2	2-2013	Fever	10.8542	3. Lake Endemic	MDR184	2. 6 - 15 years
KDH1201782	Kisumu DH	1/17/2012	Kisumu	Female	Kisumu	Yes	1-2 months	Yes		2	1	No			Headache	3	55	37.1	60	Malaria		920250					Lake Endemic	21	Above 15 years	wild type/Mutant	Wild type	Mutant	2012-01-17	2012	1	1	0	1-2012	Headache	13.7324	3. Lake Endemic	MDR184	3. Above 15 years
KDH1008472	Kisumu DH	8/16/2010	Kisumu	Female	Kisumu	Yes	2-4 weeks	Yes		3	3	No			Fever	2	15	37.8	152	Malaria		103500					Lake Endemic	3	0 - 5 years	Mutant	Mutant	Wild type	2010-08-16	2010	3	1	1	3-2010	Fever	11.5473	3. Lake Endemic	MDR86	1. 0 - 5 years
KDH1011522	Kisumu DH	11/25/2010	Kisumu	Male	Kisumu	No		Yes		7	1	No			Headache	1	55	39	92	Malaria		24750					Lake Endemic	15	6 - 15 years	undetermined	wild type/Mutant	Wild type	2010-11-25	2010	4	0	2	4-2010	Headache	10.1166	3. Lake Endemic		2. 6 - 15 years
KDH14031361	Kisumu DH	3/24/2014	Kisumu	Male	Kisumu	No		Yes		3	6	No			Fever	3	12.3	39.3	160	Malaria		675000					Lake Endemic	2	0 - 5 years	undetermined	undetermined	Wild type	2014-03-24	2014	1	0	2	1-2014	Fever	13.4225	3. Lake Endemic		1. 0 - 5 years
KOM1401127	Kombewa DH	1/15/2014	Kisumu	Male	Kisumu	No		Yes		1	3	Yes	Other	Hospital/Dispensary	Headache	2	29	38	121	Malaria		71040					Lake Endemic	11	6 - 15 years	Mutant	Wild type	Mutant	2014-01-15	2014	1	1	1	1-2014	Headache	11.171	3. Lake Endemic	MDR184	2. 6 - 15 years
KDH0805045	Kisumu DH	5/14/2008	Kisumu	Male	Kisumu	No		Yes		7	2	No			Headache		50	37.7	62	Malaria		407250					Lake Endemic	18	Above 15 years	Mutant	Wild type	Wild type	2008-05-14	2008	2	1	1	2-2008	Headache	12.9172	3. Lake Endemic	CRT76	3. Above 15 years
KDH1109705	Kisumu DH	9/8/2011	Kisumu	Female	Kisumu	Yes	<2weeks	Yes		9	1	No			Fever	5	20	37.7	140	Malaria		58500					Lake Endemic	6	6 - 15 years	wild type/Mutant	wild type/Mutant	undetermined	2011-09-08	2011	3	0	0	3-2011	Fever	10.9768	3. Lake Endemic		2. 6 - 15 years
KDH1006449	Kisumu DH	6/28/2010	Kisumu	Female	Kisumu	No		Yes		2	1	No			Fever	3	17.2	39.2	172	Malaria		49500					Lake Endemic	3	0 - 5 years	Mutant	Mutant	Mutant	2010-06-28	2010	2	1	1	2-2010	Fever	10.8097	3. Lake Endemic	MDR184	1. 0 - 5 years
KDH13121257	Kisumu DH	12/3/2013	Kisumu	Female	Kisumu	No		Yes	1	5	0	No			Fever	1	10.8	38.9	144	Malaria	RTI	13500					Lake Endemic	1	0 - 5 years	Wild type	Wild type	Mutant	2013-12-03	2013	4	1	0	4-2013	Fever	9.51044	3. Lake Endemic	MDR184	1. 0 - 5 years
KDH13121258	Kisumu DH	12/3/2013	Kisumu	Male	Kisumu	No		Yes		6	3	No			Fever	2	17	37.2	120	Malaria		83250					Lake Endemic	4	0 - 5 years	Wild type	Wild type	Mutant	2013-12-03	2013	4	1	0	4-2013	Fever	11.3296	3. Lake Endemic	MDR184	1. 0 - 5 years
KDH0906229	Kisumu DH	6/8/2009	Kisumu	Female	Kisumu	Yes	<2weeks	Yes		2	3	No			Headache	5	23	38.5	79	Malaria		567000					Lake Endemic	11	6 - 15 years	Wild type	Wild type	Wild type	2009-06-08	2009	2	0	0	2-2009	Headache	13.2481	3. Lake Endemic		2. 6 - 15 years
KDH1103578	Kisumu DH	3/4/2011	Kisumu	Male	Kisumu	No		Yes		11	1	No			Fever	2	34	37.2	108	Malaria		81000					Lake Endemic	11	6 - 15 years	Mutant	Wild type	Mutant	2011-03-04	2011	1	1	1	1-2011	Fever	11.3022	3. Lake Endemic	MDR184	2. 6 - 15 years
KDH14051403	Kisumu DH	5/19/2014	Kisumu	Female	Kisumu	No		Yes		6	1	No			Headache	2	56	36.5	70	Malaria		78750					Lake Endemic	21	Above 15 years	undetermined	wild type/Mutant	wild type/Mutant	2014-05-19	2014	2	0	2	2-2014	Headache	11.274	3. Lake Endemic		3. Above 15 years
KDH1006443	Kisumu DH	6/16/2010	Kisumu	Female	Kisumu	No		Yes	1	3		No			Fever	2	60	35.6	80	Malaria		29250					Lake Endemic	19	Above 15 years	Wild type	Wild type	Mutant	2010-06-16	2010	2	1	0	2-2010	Fever	10.2836	3. Lake Endemic	MDR184	3. Above 15 years
KDH1006434	Kisumu DH	6/2/2010	Kisumu	Female	Kisumu	No		Yes	3			No			Headache	6	45	39.6	144	Malaria		153000					Lake Endemic	15	6 - 15 years	Wild type	Wild type	Mutant	2010-06-02	2010	2	1	0	2-2010	Headache	11.9382	3. Lake Endemic	MDR184	2. 6 - 15 years
KDH1107655	Kisumu DH	7/4/2011	Kisumu	Female	Kisumu	No		Yes		2		No			Fever	1	171	39.2	136	Malaria		33750					Lake Endemic	4	0 - 5 years	Wild type	Wild type	undetermined	2011-07-04	2011	3	0	0	3-2011	Fever	10.4267	3. Lake Endemic		1. 0 - 5 years
KDH1012532	Kisumu DH	12/7/2010	Kisumu	Male	Kisumu	No		Yes		7		No			Fever	2	12	37.7	176	Malaria		126000					Lake Endemic	2	0 - 5 years	Wild type	Wild type	Mutant	2010-12-07	2010	4	1	0	4-2010	Fever	11.744	3. Lake Endemic	MDR184	1. 0 - 5 years
KDH1108693	Kisumu DH	8/22/2011	Kisumu	Female	Kisumu	Yes	<2weeks	Yes		2	4	No			Fever	8	21	36.4	128	Malaria		13500					Lake Endemic	6	6 - 15 years	Wild type	Wild type	undetermined	2011-08-22	2011	3	0	0	3-2011	Fever	9.51044	3. Lake Endemic		2. 6 - 15 years
KDH0905220	Kisumu DH	5/25/2009	Kisumu	Male	Kisumu	No		Yes	1	6		No			Fever	7	24	40.2	144	Malaria		22500					Lake Endemic	8	6 - 15 years	Mutant	undetermined	undetermined	2009-05-25	2009	2	1	1	2-2009	Fever	10.0213	3. Lake Endemic	CRT76	2. 6 - 15 years
KDH1111752	Kisumu DH	11/10/2011	Kisumu	Male	Kisumu	No		Yes	1		1	No			Fever	3	63	37.5	88	Malaria		159750					Lake Endemic	14	6 - 15 years	Wild type	Wild type	Mutant	2011-11-10	2011	4	1	0	4-2011	Fever	11.9814	3. Lake Endemic	MDR184	2. 6 - 15 years
KDH0803011	Kisumu DH	3/25/2008	Kisumu	Male	Kisumu	Yes	1-2 months	Yes		5	1	No			Fever	4	13	37.9	127	Malaria		1320					Lake Endemic	3	0 - 5 years	wild type/Mutant	Mutant	Wild type	2008-03-25	2008	1	1	0	1-2008	Fever	7.18539	3. Lake Endemic	MDR86	1. 0 - 5 years
KDH14011278	Kisumu DH	1/13/2014	Kisumu	Male	Kisumu	Yes	2-4 weeks	Yes		7	1	No			Fever	1	16	38.6	152	Malaria		3120					Lake Endemic	3	0 - 5 years	Wild type	Wild type	Wild type	2014-01-13	2014	1	0	0	1-2014	Fever	8.04559	3. Lake Endemic		1. 0 - 5 years
KDH14061428	Kisumu DH	6/6/2014	Kisumu	Female	Kisumu	Yes	1-2 months	Yes		1	2	Yes	Fansidar	Pharmacist	Fever	2	10	36.7	144	Malaria		33750					Lake Endemic	2	0 - 5 years	undetermined	wild type/Mutant	wild type/Mutant	2014-06-06	2014	2	0	2	2-2014	Fever	10.4267	3. Lake Endemic		1. 0 - 5 years
KDH14051393	Kisumu DH	5/8/2014	Kisumu	Male	Kisumu	No		Yes		5	2	No			Fever	4	68	37.5	102	Malaria		11250					Lake Endemic	20	Above 15 years	Mutant	Wild type	Wild type	2014-05-08	2014	2	1	1	2-2014	Fever	9.32812	3. Lake Endemic	CRT76	3. Above 15 years
KDH1108690	Kisumu DH	8/18/2011	Kisumu	Male	Kisumu	No		Yes		6	2	No			Fever	1	15.7	40.6	208	Malaria		24750					Lake Endemic	2	0 - 5 years		Wild type	undetermined	2011-08-18	2011	3	0	0	3-2011	Fever	10.1166	3. Lake Endemic		1. 0 - 5 years
KDH1101545	Kisumu DH	1/11/2011	Kisumu	Female	Kisumu	No		No				No			Fever	5	8.2	38.5	171	Malaria		33750					Lake Endemic	1	0 - 5 years	undetermined	wild type/Mutant	Wild type	2011-01-11	2011	1	0	2	1-2011	Fever	10.4267	3. Lake Endemic		1. 0 - 5 years
KDH1209885	Kisumu DH	9/12/2012	Kisumu	Male	Kisumu	Yes	2-4 weeks	Yes		2	2	No			Vomiting	5	22	36.6	128	Malaria		45000					Lake Endemic	7	6 - 15 years	undetermined	Wild type	wild type/Mutant	2012-09-12	2012	3	0	2	2-2013	Others	10.7144	3. Lake Endemic		2. 6 - 15 years
KDH0910271	Kisumu DH	10/14/2009	Kisumu	Female	Kisumu	No		Yes		4	1	No			Fever	2	13		90	Malaria		11250					Lake Endemic	3	0 - 5 years	Mutant	Wild type	Mutant	2009-10-14	2009	4	1	1	4-2009	Fever	9.32812	3. Lake Endemic	MDR184	1. 0 - 5 years
KDH14041375	Kisumu DH	4/14/2014	Kisumu	Female	Kisumu	Yes	<2weeks	Yes		2	3	No			Fever	2	15	39.8	146	Malaria		51750					Lake Endemic	3	0 - 5 years	Wild type	Wild type	Mutant	2014-04-14	2014	2	1	0	2-2014	Fever	10.8542	3. Lake Endemic	MDR184	1. 0 - 5 years
KDH1007463	Kisumu DH	7/13/2010	Kisumu	Female	Kisumu	No		Yes	2			No			Fever	2	11	39.5	172	Malaria		45000					Lake Endemic	2	0 - 5 years	Wild type	Wild type	Mutant	2010-07-13	2010	3	1	0	3-2010	Fever	10.7144	3. Lake Endemic	MDR184	1. 0 - 5 years
KDH1101556	Kisumu DH	1/21/2011	Kisumu	Female	Kisumu	Yes	2-4 weeks	Yes		2	3	No			Vomiting	3	17.3	36.6	108	Malaria		11250					Lake Endemic	7	6 - 15 years	Wild type	Wild type	Wild type	2011-01-21	2011	1	0	0	1-2011	Others	9.32812	3. Lake Endemic		2. 6 - 15 years
KOM1403177	Kombewa DH	3/6/2014	Kisumu	Female	Kisumu	No		Yes		7	2	No			Fever	3	18	36.5	97			1120					Lake Endemic	6	6 - 15 years	Wild type	Wild type	wild type/Mutant	2014-03-06	2014	1	0	0	1-2014	Fever	7.02108	3. Lake Endemic		2. 6 - 15 years
KDH1207862	Kisumu DH	7/11/2012	Kisumu	Male	Kisumu	No		Yes	7		0	No			Stomachache	2	52	35.4	60	Malaria		36000					Lake Endemic	15	6 - 15 years	wild type/Mutant	wild type/Mutant	Wild type	2012-07-11	2012	3	0	0	2-2013	Others	10.4913	3. Lake Endemic		2. 6 - 15 years
KDH0811149	Kisumu DH	11/12/2008	Kisumu	Male	Kisumu	Yes	<2weeks	Yes			1	Yes	Other	Hospital/Dispensary	Fever	4	14	39.2	102	Malaria	RTI	69750					Lake Endemic	3	0 - 5 years	Mutant	wild type/Mutant	Wild type	2008-11-12	2008	4	1	1	4-2008	Fever	11.1527	3. Lake Endemic	CRT76	1. 0 - 5 years
KOM1403179	Kombewa DH	3/10/2014	Kisumu	Female	Kisumu	No		Yes		3	4	No			Fever	3	15	37.9	113	Malaria		217920					Lake Endemic	5	0 - 5 years	Wild type	Wild type	Mutant	2014-03-10	2014	1	1	0	1-2014	Fever	12.2919	3. Lake Endemic	MDR184	1. 0 - 5 years
KDH1006450	Kisumu DH	6/29/2010	Kisumu	Male	Kisumu	No		Yes		3	4	No			Fever	3	11	39.3	180	Malaria		42750					Lake Endemic	2	0 - 5 years	Wild type	Wild type	Wild type	2010-06-29	2010	2	0	0	2-2010	Fever	10.6631	3. Lake Endemic		1. 0 - 5 years
KOM1404200	Kombewa DH	4/8/2014	Kisumu	Female	Kisumu	No		Yes		6	2	No			Fever	2	18	36.6	91	Malaria		200					Lake Endemic	6	6 - 15 years	Wild type	Wild type	wild type/Mutant	2014-04-08	2014	2	0	0	2-2014	Fever	5.29832	3. Lake Endemic		2. 6 - 15 years
KOM1401129	Kombewa DH	1/15/2014	Kisumu	Female	Kisumu	No		Yes		3	4	No			Fever	2	10	38	121	Malaria		10880					Lake Endemic	2	0 - 5 years	Wild type	Wild type	Mutant	2014-01-15	2014	1	1	0	1-2014	Fever	9.29468	3. Lake Endemic	MDR184	1. 0 - 5 years
KDH13111228	Kisumu DH	11/6/2013	Kisumu	Male	Kisumu	No		Yes		6	3	No			Fever	4	10.6	37.7	132	Malaria							Lake Endemic	2	0 - 5 years	Wild type	Wild type	wild type/Mutant	2013-11-06	2013	4	0	0	4-2013	Fever		3. Lake Endemic		1. 0 - 5 years
KDH0811151	Kisumu DH	11/18/2008	Kisumu	Male	Kisumu	Yes	2-4 weeks	Yes		3	5	No			Fever	2	14	35.7	121	Malaria		342000					Lake Endemic	2	0 - 5 years	Mutant	Wild type	Wild type	2008-11-18	2008	4	1	1	4-2008	Fever	12.7426	3. Lake Endemic	CRT76	1. 0 - 5 years
KDH1205838	Kisumu DH	5/11/2012	Kisumu	Male	Kisumu	Yes	2-4 weeks	Yes	1		0	No			Fever	1	15	37.9	140	Malaria		146250					Lake Endemic	3	0 - 5 years	Mutant	Mutant	Mutant	2012-05-11	2012	2	1	1	2-2012	Fever	11.8931	3. Lake Endemic	MDR184	1. 0 - 5 years
KDH1201783	Kisumu DH	1/18/2012	Kisumu	Male	Kisumu	Yes	1-2 months	Yes		6	2	No			Fever	1	12.5	37.2	144	Malaria		47250					Lake Endemic	2	0 - 5 years	wild type/Mutant	Wild type	wild type/Mutant	2012-01-18	2012	1	0	0	1-2012	Fever	10.7632	3. Lake Endemic		1. 0 - 5 years
KDH0811153	Kisumu DH	11/24/2008	Kisumu	Male	Kisumu	No		Yes	5		0	No			Headache	14	21	35.5	106	Malaria	Tinea Capitis	40500					Lake Endemic	6	6 - 15 years	Mutant	Wild type	Wild type	2008-11-24	2008	4	1	1	4-2008	Headache	10.6091	3. Lake Endemic	CRT76	2. 6 - 15 years
KDH13121261	Kisumu DH	12/5/2013	Kisumu	Female	Kisumu	No		Yes		4	1	No			Fever	1	13.4	37	132	Malaria		81000					Lake Endemic	2	0 - 5 years	Wild type	Wild type	Mutant	2013-12-05	2013	4	1	0	4-2013	Fever	11.3022	3. Lake Endemic	MDR184	1. 0 - 5 years
KDH1102575	Kisumu DH	2/25/2011	Kisumu	Male	Kisumu	Yes	2-4 weeks	Yes			1	Yes	Quinine	Pharmacist	Fever	4	12.2	38	124	Malaria		33750					Lake Endemic	1	0 - 5 years	Wild type	undetermined	Mutant	2011-02-25	2011	1	1	0	1-2011	Fever	10.4267	3. Lake Endemic	MDR184	1. 0 - 5 years
KDH0902184	Kisumu DH	2/23/2009	Kisumu	Male	Kisumu	No		Yes		2	6	No			Fever	3	15	35.5	113	Malaria		22500					Lake Endemic	2	0 - 5 years	Mutant	Mutant	Mutant	2009-02-23	2009	1	1	1	1-2009	Fever	10.0213	3. Lake Endemic	MDR184	1. 0 - 5 years
KDH14071453	Kisumu DH	7/22/2014	Kisumu	Male	Kisumu	No		No				No			Fever	3	12.4	38.4	164	Malaria		9000					Lake Endemic	2	0 - 5 years	Wild type	Wild type	Mutant	2014-07-22	2014	3	1	0	3-2014	Fever	9.10498	3. Lake Endemic	MDR184	1. 0 - 5 years
KDH1001339	Kisumu DH	1/26/2010	Kisumu	Female	Kisumu	Yes	2-4 weeks	Yes		4	2	No			Fever	5	17	38.5	160	Malaria		20250					Lake Endemic	5	0 - 5 years	undetermined	Mutant	undetermined	2010-01-26	2010	1	1	2	1-2010	Fever	9.91591	3. Lake Endemic	MDR86	1. 0 - 5 years
KDH0806058	Kisumu DH	6/3/2008	Kisumu	Male	Kisumu	Yes	2-4 weeks	Yes			1	No			Fever	3	16	39.8	98	Malaria		245250					Lake Endemic	3	0 - 5 years	undetermined	Mutant	Wild type	2008-06-03	2008	2	1	2	2-2008	Fever	12.41	3. Lake Endemic	MDR86	1. 0 - 5 years
KDH1209886	Kisumu DH	9/12/2012	Kisumu	Female	Kisumu	Yes	2-4 weeks	Yes		9	1	No			Fever	2	18	36.4	120	Malaria		22500					Lake Endemic	4	0 - 5 years	undetermined	Wild type	Wild type	2012-09-12	2012	3	0	2	2-2013	Fever	10.0213	3. Lake Endemic		1. 0 - 5 years
KOM1407290	Kombewa DH	7/9/2014	Kisumu	Male	Kisumu	No		Yes		3	4	No			Fever	3	15	37.9	121	Malaria		2280					Lake Endemic	3	0 - 5 years	Wild type	Wild type	Mutant	2014-07-09	2014	3	1	0	3-2014	Fever	7.73193	3. Lake Endemic	MDR184	1. 0 - 5 years
KOM1311100	Kombewa DH	11/6/2013	Kisumu	Female	Kisumu	No		Yes		1	5	Yes	Other		Fever	3	16	38.1	101	Malaria		268800					Lake Endemic	3	0 - 5 years	Wild type	Wild type	Mutant	2013-11-06	2013	4	1	0	4-2013	Fever	12.5017	3. Lake Endemic	MDR184	1. 0 - 5 years
KOM1310090	Kombewa DH	12/3/2013	Kisumu	Female	Kisumu	No		Yes		4	6	No			Fever	3	14	37.1	123	Malaria		680			2480		Lake Endemic	3	0 - 5 years	Wild type	Wild type	Wild type	2013-12-03	2013	4	0	0	4-2013	Fever	6.52209	3. Lake Endemic		1. 0 - 5 years
KDH1009493	Kisumu DH	9/27/2010	Kisumu	Female	Kisumu	Yes	2-4 weeks	Yes	1	3		No			Fever	3	13.8	35	116	Malaria		67500					Lake Endemic	3	0 - 5 years	Mutant	Wild type	Wild type	2010-09-27	2010	3	1	1	3-2010	Fever	11.1199	3. Lake Endemic	CRT76	1. 0 - 5 years
KDH0810138	Kisumu DH	10/14/2008	Kisumu	Male	Kisumu	Yes	2-4 weeks	Yes	1	1	0	No			Headache	1	19	38	114	Malaria		148500					Lake Endemic	5	0 - 5 years	Mutant	Wild type	Wild type	2008-10-14	2008	4	1	1	4-2008	Headache	11.9083	3. Lake Endemic	CRT76	1. 0 - 5 years
[truncated: 235 more rows]
